# Supplementary material for: Drosophila Fezf coordinates laminar-specific connectivity through cell-intrinsic and cell-extrinsic mechanisms
Source: eLife. 2018 Mar 7;7:e33962. doi: 10.7554/eLife.33962 (PMC5854465; doi:10.7554/eLife.33962)
Supplement: Figure 2—source data 1. [file elife-33962-fig2-data1.xlsx]

## Sheet: Sheet1
Source Data for graphs
Figure 2J
Legend	Wild Type (%)	dFezf (%)
M3: Normal	100	0
M1-M2	0	84
M3: Abnormal	0	5
M4-M6	0	11
