# Supplementary material for: Drosophila Fezf coordinates laminar-specific connectivity through cell-intrinsic and cell-extrinsic mechanisms
Source: eLife. 2018 Mar 7;7:e33962. doi: 10.7554/eLife.33962 (PMC5854465; doi:10.7554/eLife.33962)
Supplement: Figure 3—source data 1. [file elife-33962-fig3-data1.xlsx]

## Sheet: Sheet1
Source Data for graphs
Figure 3E
Legend	wt (all) (%)	dFezf (all) (%)	wt (yng) (%)	dFezf (yng) (%)	CadN, Sema-1a, dFezf (all) (%)
Prox OM	97	4	81	18	16
Distal OM	3	96	19	82	84
Figure 3K				Figure 3L
Legend	wt (%)	dFezf (%)		Legend	dFezf + BAC (%)
Dev M3	100	0		Proximal OM	96
M1-M2	0	67		Distal OM	4
M4-M6	0	18
Dev M3 abnl	0	16
Figure 3R					Figure 3-figure supplm 1
		Target beyond the outer medulla			Legend	dFezf2
CadN, Sema-1a (%)		44			Dev. M3	0
CadN, Sema-1a, dFezf (%)		1			Dev M1-M2	45
					Dev M3 abnl	20
					Dev M4-M6	35
Figure 3-figure supplm 2B					Figure 3-figure supplm 2D
legend	dFezf1 + BAC				legend	dFezf1 + BAC
Dev M3	100				M3	100
Dev M1-M2	0				M1-M2	0
Dev M3 abnl	0				M3 abnl	0
Dev M4-M6	0				M4-M6	0
Figure 3-figure supplm 2F
legend	dFezf2 + BAC
M3	100
M1-M2	0
M3 abnl	0
M4-M6	0
