# Supplementary material for: Drosophila Fezf coordinates laminar-specific connectivity through cell-intrinsic and cell-extrinsic mechanisms
Source: eLife. 2018 Mar 7;7:e33962. doi: 10.7554/eLife.33962 (PMC5854465; doi:10.7554/eLife.33962)
Supplement: Figure 4—source data 1. [file elife-33962-fig4-data1.xlsx]

## Sheet: Sheet1
Source data for bar graphs
Figure 4D					Figure 4H
legend	wt (%)	mis-exp (%)			legend	wt (%)	mis-exp (%)
Prox	100	100			normal	100	3
Distal	0	0			reduced	0	82
					adjacent column	0	15
Figure 4L					Figure 4O
legend	wt (%)	mis-exp (%)			legend	wt (%)	mis-exp (%)
distal	100	0			M2	100	12
proximal	0	100			M2+M3	0	88
