# Supplementary material for: Drosophila Fezf coordinates laminar-specific connectivity through cell-intrinsic and cell-extrinsic mechanisms
Source: eLife. 2018 Mar 7;7:e33962. doi: 10.7554/eLife.33962 (PMC5854465; doi:10.7554/eLife.33962)
Supplement: Figure 7—source data 1. [file elife-33962-fig7-data1.xlsx]

## Sheet: Sheet1
Source data for bar graphs
Figure 7M
legend	control (%)	RNAi (%)
M3	97	55
M4-M6	3	29
M0-M2	0	16
			morning
