# Supplementary material for: Drosophila Fezf coordinates laminar-specific connectivity through cell-intrinsic and cell-extrinsic mechanisms
Source: eLife. 2018 Mar 7;7:e33962. doi: 10.7554/eLife.33962 (PMC5854465; doi:10.7554/eLife.33962)
Supplement: Supplementary file 1. [file elife-33962-supp1.xlsx]

## Sheet: transcriptsPerMillion_Counts-1
ensgene	dFezf1-A	dFezf1-B	dFezf1-C	dFezf1-D	dFezf1-E	FRT40-A	FRT40-B	FRT40-C	FRT40-D	FRT40-E	symbol	description
FBgn0000008	0.0395063	0	0	0.119687	0	0	0.152468	0	0	0	a	arc [Source:FlyBase;Acc:FBgn0000008]
FBgn0000017	11.4507	7.13587	19.509	16.2096	9.02664	16.0452	16.3377	37.6141	12.1597	9.71796	Abl	Abl tyrosine kinase [Source:FlyBase;Acc:FBgn0000017]
FBgn0000018	0	1.53507	0.254167	0.0770731	0.339424	0.376219	1.15715	0	0	1.19719	abo	abnormal oocyte [Source:FlyBase;Acc:FBgn0000018]
FBgn0000024	1.5382	0.672877	11.2572	4.09711	2.25542	22.1631	30.0782	63.414	27.0358	25.8164	Ace	Acetylcholine esterase [Source:FlyBase;Acc:FBgn0000024]
FBgn0000028	0.0201157	0	0	0	0	0	0.228048	8.65237	0	0	acj6	abnormal chemosensory jump 6 [Source:FlyBase;Acc:FBgn0000028]
FBgn0000032	1.58179	2.39363	0	0.0234175	0.213175	0.992391	2.27714	12.463	0.782534	1.15187	Acph-1	Acid phosphatase 1 [Source:FlyBase;Acc:FBgn0000032]
FBgn0000036	6.50814	4.3858	10.4704	9.39837	6.05763	9.43775	7.29665	26.3866	6.55539	6.54422	nAChRalpha1	nicotinic Acetylcholine Receptor alpha1 [Source:FlyBase;Acc:FBgn0000036]
FBgn0000037	1.78431	1.01809	2.10915	3.18565	0.733895	9.48132	6.49446	12.8516	7.7688	1.75199	mAChR-A	muscarinic Acetylcholine Receptor, A-type [Source:FlyBase;Acc:FBgn0000037]
FBgn0000038	75.0446	59.3348	196.484	112.138	60.6697	69.6538	69.0828	225.925	53.3417	44.9224	nAChRbeta1	nicotinic Acetylcholine Receptor beta1 [Source:FlyBase;Acc:FBgn0000038]
FBgn0000039	2.72523	2.41989	6.42865	3.80883	1.28772	4.86787	6.14167	6.63256	10.6262	5.6363	nAChRalpha2	nicotinic Acetylcholine Receptor alpha2 [Source:FlyBase;Acc:FBgn0000039]
FBgn0000042	112.419	118.236	120.388	108.577	65.775	50.3327	131.869	132.863	116.748	91.7117	Act5C	Actin 5C [Source:FlyBase;Acc:FBgn0000042]
FBgn0000043	80.9159	114.93	87.8699	111.857	58.5516	154.538	171.344	231.571	162.837	131.283	Act42A	Actin 42A [Source:FlyBase;Acc:FBgn0000043]
FBgn0000044	0	0.083266	0	0	0.0296411	0	0	0	0	0	Act57B	Actin 57B [Source:FlyBase;Acc:FBgn0000044]
FBgn0000045	0	0	0	0.0306744	0	0	0.0307095	0	0	0	Act79B	Actin 79B [Source:FlyBase;Acc:FBgn0000045]
FBgn0000046	0	0.0470249	0.0374862	0	0	0	0	0	0	0	Act87E	Actin 87E [Source:FlyBase;Acc:FBgn0000046]
FBgn0000047	0.045888	0	0	0	0	0	0.0295328	0	0.0515953	0.0305477	Act88F	Actin 88F [Source:FlyBase;Acc:FBgn0000047]
FBgn0000053	0.0230347	0.0186788	0	0	0	0	0	0	0	0	ade3	adenosine 3 [Source:FlyBase;Acc:FBgn0000053]
FBgn0000054	16.049	11.6849	21.862	20.9353	21.4038	23.7127	22.4542	4.43753	26.0177	21.0361	Adf1	Adh transcription factor 1 [Source:FlyBase;Acc:FBgn0000054]
FBgn0000055	0	0.499688	0	0	0	0.118382	1.68751	0	0.0461241	1.27444	Adh	Alcohol dehydrogenase [Source:FlyBase;Acc:FBgn0000055]
FBgn0000056	0	2.91641	0	0	0	0	0.0291267	0	0	0.0100448	Adhr	Adh-related [Source:FlyBase;Acc:FBgn0000056]
FBgn0000057	1.08891	3.36654	5.54434	3.54683	0.021401	4.44243	2.37336	30.6266	1.54969	4.15781	adp	adipose [Source:FlyBase;Acc:FBgn0000057]
FBgn0000063	0.0447772	0.443775	0.0557101	0.853609	0	0.256349	0.255658	0.740812	0	0	ald	altered disjunction [Source:FlyBase;Acc:FBgn0000063]
FBgn0000064	7.55575	4.85174	7.47017	9.09462	5.42429	12.7279	16.2075	29.8012	11.6772	20.3286	Ald	Aldolase [Source:FlyBase;Acc:FBgn0000064]
FBgn0000077	2.69661	2.97545	0	1.7742	0.681407	0	0.619473	0	0.396609	2.9909	amx	almondex [Source:FlyBase;Acc:FBgn0000077]
FBgn0000083	15.2106	5.80821	16.2369	11.4308	11.319	7.70158	8.07909	8.50278	8.2439	9.29574	AnxB9	Annexin B9 [Source:FlyBase;Acc:FBgn0000083]
FBgn0000084	12.2138	6.68042	16.302	16.2517	13.2704	17.3923	15.2379	23.0274	17.8887	7.77971	AnxB10	Annexin B10 [Source:FlyBase;Acc:FBgn0000084]
FBgn0000092	0	0	0	0.295411	0	0	0	0.270232	0	0	CG2650	Circadian clock-controlled protein [Source:UniProtKB/Swiss-Prot;Acc:O76879]
FBgn0000097	18.6619	25.0006	48.0611	25.709	11.7353	15.5759	24.4665	54.82	19.8497	23.8349	aop	anterior open [Source:FlyBase;Acc:FBgn0000097]
FBgn0000100	65.0397	85.9267	62.8627	54.1751	54.1037	72.1436	72.2926	45.7124	84.1533	52.3621	RpLP0	Ribosomal protein LP0 [Source:FlyBase;Acc:FBgn0000100]
FBgn0000108	58.2014	45.515	151.955	106.01	50.5646	109.418	76.0188	258.913	92.5482	83.8717	Appl	beta amyloid protein precursor-like [Source:FlyBase;Acc:FBgn0000108]
FBgn0000109	2.96803	4.02942	2.59761	0.0724318	1.11645	1.48496	3.40741	0	0	0.0375032	Aprt	Adenine phosphoribosyltransferase [Source:FlyBase;Acc:FBgn0000109]
FBgn0000114	4.06972	2.24262	2.00488	1.16145	0.960527	7.48525	5.50832	19.0925	6.24669	3.24272	aret	arrest [Source:FlyBase;Acc:FBgn0000114]
FBgn0000115	4.35911	9.25712	1.59889	12.0888	0.925263	6.72138	10.0616	1.51312	5.31013	5.65676	Arl1	ADP ribosylation factor-like 1 [Source:FlyBase;Acc:FBgn0000115]
FBgn0000116	26.1751	27.0855	21.2059	30.6526	23.0353	27.7966	28.6762	35.6902	32.8331	22.9803	Argk	Arginine kinase [Source:FlyBase;Acc:FBgn0000116]
FBgn0000117	50.6094	40.0453	97.7169	68.1146	44.9233	64.8204	45.2508	119.079	74.0179	53.9437	arm	armadillo [Source:FlyBase;Acc:FBgn0000117]
FBgn0000119	2.72017	1.94366	2.55842	1.88325	1.67993	2.57666	2.25302	0.625628	3.47754	2.52671	arr	arrow [Source:FlyBase;Acc:FBgn0000119]
FBgn0000120	0.138876	0.0554081	0	0	0	0	0.0538332	0	0	0	Arr1	Arrestin 1 [Source:FlyBase;Acc:FBgn0000120]
FBgn0000137	0	0	0	0	0	0.0799529	0.0182159	2.65053	0	0	ase	asense [Source:FlyBase;Acc:FBgn0000137]
FBgn0000139	1.61162	2.78076	0	0	0.0855203	0	1.06902	1.45734	0	0.0201094	ash2	absent, small, or homeotic discs 2 [Source:FlyBase;Acc:FBgn0000139]
FBgn0000146	0	0.151804	1.2092	0.0471726	0.034297	0.635995	0.201827	0	0	0	aub	aubergine [Source:FlyBase;Acc:FBgn0000146]
FBgn0000147	0	0	0	0	0	1.84623	0.0767607	0	0	0	aurA	aurora A [Source:FlyBase;Acc:FBgn0000147]
FBgn0000150	117.586	194.886	73.8527	58.2722	53.2646	64.1327	134.941	58.674	113.861	98.0737	awd	abnormal wing discs [Source:FlyBase;Acc:FBgn0000150]
FBgn0000152	0	0.281281	0	0.068259	0	0.302056	0	0	0	0	Axs	Abnormal X segregation [Source:FlyBase;Acc:FBgn0000152]
FBgn0000157	0.0072367	0	0	0	0	0	0.186229	0	0	0.160561	Dll	Distal-less [Source:FlyBase;Acc:FBgn0000157]
FBgn0000163	0.349964	0.324585	0.763524	0.611048	0	0.37284	0.333384	0.910451	0.139053	0.257062	baz	bazooka [Source:FlyBase;Acc:FBgn0000163]
FBgn0000166	0.100431	0	0	0	0	0	0.061202	0	0	0	bcd	bicoid [Source:FlyBase;Acc:FBgn0000166]
FBgn0000173	36.3765	39.0758	28.7119	43.8136	10.7964	37.4401	28.1475	25.2364	23.3291	22.473	ben	bendless [Source:FlyBase;Acc:FBgn0000173]
FBgn0000179	0.0640699	0.0148192	0	0.0208964	0	0	0.150776	0	0	0.0893771	bi	bifid [Source:FlyBase;Acc:FBgn0000179]
FBgn0000180	0.523722	0.00675606	0	0.485176	1.64582	0.480652	0.498998	0.0341026	0.252122	0.0135838	bib	big brain [Source:FlyBase;Acc:FBgn0000180]
FBgn0000181	53.1121	63.6766	48.004	100.025	58.5057	61.9785	54.6564	90.5883	60.7347	60.0517	bic	bicaudal [Source:FlyBase;Acc:FBgn0000181]
FBgn0000183	3.37905	1.99176	2.89983	6.10298	4.22305	3.41114	3.85476	14.3575	5.09559	2.86245	BicD	Bicaudal D [Source:FlyBase;Acc:FBgn0000183]
FBgn0000212	2.25195	2.15737	2.41596	0.57065	1.81581	1.48751	2.29084	6.8124	0.55878	0.339885	brm	brahma [Source:FlyBase;Acc:FBgn0000212]
FBgn0000221	2.27998	0	0	3.99901	0	0	0.446578	0	0	0.273795	brn	brainiac [Source:FlyBase;Acc:FBgn0000221]
FBgn0000228	0.616302	0.860663	0.801845	1.42952	0.759741	1.56323	2.09515	0.796654	0.628129	0.454059	Bsg25D	Blastoderm-specific gene 25D [Source:FlyBase;Acc:FBgn0000228]
FBgn0000229	20.7485	44.8754	48.2462	38.921	17.2969	69.6967	36.8106	58.1965	45.0934	33.7075	bsk	basket [Source:FlyBase;Acc:FBgn0000229]
FBgn0000233	0.00766794	0	0.0365631	0	0	0	0.0073983	0.0384464	0	0	btd	buttonhead [Source:FlyBase;Acc:FBgn0000233]
FBgn0000239	0.330334	1.39061	0.393783	0.456874	0.33534	1.66263	0.832238	6.80509	0.481379	1.88095	bur	burgundy [Source:FlyBase;Acc:FBgn0000239]
FBgn0000241	5.46397	0.906362	0	1.28776	0	0	0.649444	0	0	0.0433515	bw	brown [Source:FlyBase;Acc:FBgn0000241]
FBgn0000244	2.06334	0	0	0	1.84741	0	0.566039	0	0	0.129413	by	blistery [Source:FlyBase;Acc:FBgn0000244]
FBgn0000246	4.27572	1.15088	2.11415	2.01425	2.19902	1.49733	2.65153	0	0.612093	1.5275	c(3)G	crossover suppressor on 3 of Gowen [Source:FlyBase;Acc:FBgn0000246]
FBgn0000247	0.964142	0.758106	4.70982	1.53143	0.831518	1.45595	1.07899	0.151091	0.169224	0.916834	ca	claret [Source:FlyBase;Acc:FBgn0000247]
FBgn0000250	15.7027	7.23157	10.6698	10.1539	2.91193	7.57559	5.42937	18.505	5.00443	4.51982	cact	cactus [Source:FlyBase;Acc:FBgn0000250]
FBgn0000251	0.00978537	0	0.0233298	0	0	0	0	0	0	0	cad	caudal [Source:FlyBase;Acc:FBgn0000251]
FBgn0000253	329.969	296.049	518.714	525.149	261.579	441.417	291.646	551.787	427.422	327.307	Cam	Calmodulin [Source:FlyBase;Acc:FBgn0000253]
FBgn0000256	0.918763	1.65843	4.39305	2.9652	1.06666	2.45057	1.74391	5.29377	1.51637	1.72785	capu	cappuccino [Source:FlyBase;Acc:FBgn0000256]
FBgn0000257	1.39609	2.27572	0.258528	4.15323	0	1.55111	1.10056	2.50097	0	1.19067	car	carnation [Source:FlyBase;Acc:FBgn0000257]
FBgn0000259	55.8994	50.5964	110.258	71.902	36.6455	77.6601	58.4582	119.49	54.9436	55.3236	CkIIbeta	Casein kinase II beta subunit [Source:FlyBase;Acc:FBgn0000259]
FBgn0000261	1.01525	0.0234468	1.09768	0.955901	0.0250578	0.699909	0.558118	0.532716	0	0.24747	Cat	Catalase [Source:FlyBase;Acc:FBgn0000261]
FBgn0000273	19.6194	14.1117	43.6918	34.9141	12.6035	22.9809	18.898	59.0116	29.9279	21.1005	Pka-C1	cAMP-dependent protein kinase 1 [Source:FlyBase;Acc:FBgn0000273]
FBgn0000283	6.4435	5.8831	1.29541	1.90085	2.23055	4.12069	4.48553	3.63345	2.72816	2.75147	Cp190	Centrosomal protein 190kD [Source:FlyBase;Acc:FBgn0000283]
FBgn0000286	6.32259	4.70121	33.7102	15.1516	6.65731	4.55984	4.3104	19.0509	7.4475	2.80078	Cf2	Chorion factor 2 [Source:FlyBase;Acc:FBgn0000286]
FBgn0000289	15.7081	9.28841	21.987	24.3673	10.5993	21.2252	18.3104	39.6627	32.926	15.4368	cg	combgap [Source:FlyBase;Acc:FBgn0000289]
FBgn0000299	0	0	0	0	0.220366	0	0.405698	0	0	0.00763155	Cg25C	Collagen type IV [Source:FlyBase;Acc:FBgn0000299]
FBgn0000303	2.43622	1.99151	17.7045	15.2887	4.69348	9.33169	7.12927	21.9929	10.9546	9.42884	Cha	Choline acetyltransferase [Source:FlyBase;Acc:FBgn0000303]
FBgn0000307	2.28862	2.16596	4.26337	3.47691	2.21434	2.97442	2.76637	9.50316	1.62887	1.60684	chif	chiffon [Source:FlyBase;Acc:FBgn0000307]
FBgn0000308	47.7948	73.0538	69.8831	60.9784	25.7794	55.5024	87.3172	81.5533	96.546	63.6873	chic	chickadee [Source:FlyBase;Acc:FBgn0000308]
FBgn0000316	4.28222	3.30525	3.61064	6.2437	2.0608	4.3976	3.62619	11.8149	6.41564	1.75638	cin	cinnamon [Source:FlyBase;Acc:FBgn0000316]
FBgn0000317	0.349262	0	0.215352	0.191556	0	0	0.274854	0	0.0710141	0	ck	crinkled [Source:FlyBase;Acc:FBgn0000317]
FBgn0000318	66.4467	61.0824	39.3858	98.3373	29.3787	35.4459	53.1574	163.014	57.7035	40.7893	cl	clot [Source:FlyBase;Acc:FBgn0000318]
FBgn0000319	6.59354	4.65079	9.49219	11.9274	6.57131	7.87977	5.31243	13.8802	7.26032	7.2452	Chc	Clathrin heavy chain [Source:FlyBase;Acc:FBgn0000319]
FBgn0000320	0.581864	0	0.380069	0	0	0.102841	0.0230714	0	0	0	eya	eyes absent [Source:FlyBase;Acc:FBgn0000320]
FBgn0000326	3.0205	0	3.01594	0.398171	0.0273987	2.00434	0.684981	0	0	0	clt	cricklet [Source:FlyBase;Acc:FBgn0000326]
FBgn0000330	3.4764	1.75966	0.603516	1.59421	0.501486	2.09634	2.18183	0	0	0.70752	cm	carmine [Source:FlyBase;Acc:FBgn0000330]
FBgn0000339	26.1664	21.5398	32.9278	23.2364	4.15728	9.92895	13.5486	0	28.0198	10.7878	cni	cornichon [Source:FlyBase;Acc:FBgn0000339]
FBgn0000346	5.48444	2.94653	5.17149	7.55251	0.866144	6.53352	4.02468	0	0.812448	1.91903	comt	comatose [Source:FlyBase;Acc:FBgn0000346]
FBgn0000351	0.212157	0.0772681	0	0.160107	0	0	0	0	1.26233	0.106854	cort	cortex [Source:FlyBase;Acc:FBgn0000351]
FBgn0000352	1.38199	0.883227	1.52238	2.94573	1.1327	1.03014	1.70304	3.64161	0.376513	1.22018	cos	costa [Source:FlyBase;Acc:FBgn0000352]
FBgn0000370	29.9595	21.3947	27.0823	19.4714	11.8038	18.5743	14.3629	14.9022	14.5227	10.6932	crc	cryptocephal [Source:FlyBase;Acc:FBgn0000370]
FBgn0000376	0.816307	0.552481	0.917494	1.57472	0.185645	1.02009	0.198856	0.146175	0.00982308	0.815442	crm	cramped [Source:FlyBase;Acc:FBgn0000376]
FBgn0000377	0.168028	0.903021	0.37704	0	0	0.0837145	0.45775	0	0.0333032	0.069065	crn	crooked neck [Source:FlyBase;Acc:FBgn0000377]
FBgn0000382	10.098	9.5537	22.0187	19.1665	9.63709	21.6539	10.8176	52.4743	10.4157	11.5563	csw	corkscrew [Source:FlyBase;Acc:FBgn0000382]
FBgn0000384	15.0218	7.69859	13.4735	14.1568	13.7619	9.82245	10.7181	11.1643	8.58732	8.04861	cta	concertina [Source:FlyBase;Acc:FBgn0000384]
FBgn0000392	0.00992605	0.008034	0.0217551	0.00929313	0	0	0.0203274	0	0	0.00317305	cup	cup [Source:FlyBase;Acc:FBgn0000392]
FBgn0000394	0	0.0258623	0.366691	0.0375945	0	0	0.304089	0.919786	0	0.201201	cv	crossveinless [Source:FlyBase;Acc:FBgn0000394]
FBgn0000395	0	0.225503	0	1.20634	0	0.142465	0.0584248	0	0	0	cv-2	crossveinless 2 [Source:FlyBase;Acc:FBgn0000395]
FBgn0000409	94.4928	109.079	50.2334	46.394	27.6962	106.74	55.414	76.6841	28.6635	39.9825	Cyt-c-p	Cytochrome c proximal [Source:FlyBase;Acc:FBgn0000409]
FBgn0000411	0	0	0	0	0	0	0.218611	0	0	0.120627	D	Dichaete [Source:FlyBase;Acc:FBgn0000411]
FBgn0000412	25.1093	26.7085	48.3577	44.5806	36.6011	27.3754	29.8409	53.2224	19.4268	27.9462	D1	D1 chromosomal protein [Source:FlyBase;Acc:FBgn0000412]
FBgn0000414	2.18287	3.96623	5.58578	4.49956	2.85513	3.28459	3.85593	17.529	5.28445	2.41139	Dab	Disabled [Source:FlyBase;Acc:FBgn0000414]
FBgn0000416	10.1946	8.50749	29.8315	17.0935	11.1931	16.9502	10.3744	14.3188	5.05734	10.6869	Sap-r	Saposin-related [Source:FlyBase;Acc:FBgn0000416]
FBgn0000422	1.54065	0.153783	0	0	0.31538	0	0.6076	0.769758	0	0.368473	Ddc	Dopa decarboxylase [Source:FlyBase;Acc:FBgn0000422]
FBgn0000426	38.9102	43.8923	15.086	16.751	13.2305	26.6632	50.8457	6.62936	22.1159	14.1411	SmF	Small ribonucleoprotein particle protein SmF [Source:FlyBase;Acc:FBgn0000426]
FBgn0000447	0.779252	0	0	2.61986	0	0.54055	0.92014	11.0135	3.60247	0.0194604	Dhod	Dihydroorotate dehydrogenase [Source:FlyBase;Acc:FBgn0000447]
FBgn0000448	81.1402	63.8322	186.227	140.47	81.1179	75.9478	53.3278	160.195	65.7679	48.2565	Hr46	Hormone receptor-like in 46 [Source:FlyBase;Acc:FBgn0000448]
FBgn0000449	0.858898	0	8.37034	0	2.10147	0	0	0	1.13106	3.06552	dib	disembodied [Source:FlyBase;Acc:FBgn0000449]
FBgn0000451	1.93222	0.0361229	0.925059	0.654531	0.07721	0	0	0.0474178	0.0637305	0	ect	ectodermal [Source:FlyBase;Acc:FBgn0000451]
FBgn0000454	2.0799	6.03955	4.73912	3.50229	1.00908	3.86514	12.5994	27.4572	11.9092	6.6491	Dip-B	Dipeptidase B [Source:FlyBase;Acc:FBgn0000454]
FBgn0000455	3.1935	0.961014	0	0.443102	0	2.22001	0.933699	8.47604	1.38578	0.700354	Dip-C	Dipeptidase C [Source:FlyBase;Acc:FBgn0000455]
FBgn0000463	0.128321	0.14883	0	0.252819	0.238585	1.34178	0.442398	0.119147	1.5044	0.483906	Dl	Delta [Source:FlyBase;Acc:FBgn0000463]
FBgn0000464	9.40134	9.45971	20.0555	18.094	8.09634	17.3062	10.6312	21.9518	6.40535	7.83275	Lar	Leukocyte-antigen-related-like [Source:FlyBase;Acc:FBgn0000464]
FBgn0000473	5.64917	4.14651	5.54585	2.42334	0.0306673	0	0.278799	0	0	0	Cyp6a2	Cytochrome P450-6a2 [Source:FlyBase;Acc:FBgn0000473]
FBgn0000477	0	0	0	0	0	1.66243	0.608716	0	0	0.461837	DNaseII	Deoxyribonuclease II [Source:FlyBase;Acc:FBgn0000477]
FBgn0000479	4.33633	4.89203	10.4017	11.9607	10.1812	19.7652	12.7782	45.8421	22.9491	12.6753	dnc	dunce [Source:FlyBase;Acc:FBgn0000479]
FBgn0000482	1.88875	0.42829	0	0	2.25108	0.77847	0.272863	0	0.0119112	1.0163	dor	deep orange [Source:FlyBase;Acc:FBgn0000482]
FBgn0000489	0.00782235	0	0	0	0	1.193	0	0	0	0	Pka-C3	cAMP-dependent protein kinase 3 [Source:FlyBase;Acc:FBgn0000489]
FBgn0000499	2.07868	1.65456	6.97985	2.24848	2.4587	2.08312	2.16633	5.25093	4.89203	2.96199	dsh	dishevelled [Source:FlyBase;Acc:FBgn0000499]
FBgn0000520	0.223149	1.92443	0.420017	1.65292	0.947309	1.62474	1.30314	0	0	0.0586188	dwg	deformed wings [Source:FlyBase;Acc:FBgn0000520]
FBgn0000524	0	1.09683	0	6.97588	0	1.5916	0	0	1.60876	2.11317	dx	deltex [Source:FlyBase;Acc:FBgn0000524]
FBgn0000533	0.941384	1.48782	0	4.47004	1.85016	1.23044	0.2523	3.84594	0	0.69608	ea	easter [Source:FlyBase;Acc:FBgn0000533]
FBgn0000535	0.00606522	0.0120464	0	0	0	2.70883	0.652433	2.22207	1.05998	1.35468	eag	ether a go-go [Source:FlyBase;Acc:FBgn0000535]
FBgn0000536	12.9771	3.19086	15.7398	7.79225	0.434382	7.99435	6.01383	1.97222	3.27124	4.47913	eas	easily shocked [Source:FlyBase;Acc:FBgn0000536]
FBgn0000541	2.94171	3.31088	10.8987	7.78335	2.8796	3.95543	3.67227	7.54102	3.47764	5.10919	E(bx)	Enhancer of bithorax [Source:FlyBase;Acc:FBgn0000541]
FBgn0000542	0.00330983	0.0165815	0.105776	0.00642183	0.154797	0.0290875	0.0317412	0	0	0.0437856	ec	echinus [Source:FlyBase;Acc:FBgn0000542]
FBgn0000543	2.7697	1.95566	0	0.426366	0	0.891955	1.03641	8.18436	4.2403	0.420496	ecd	ecdysoneless [Source:FlyBase;Acc:FBgn0000543]
FBgn0000546	9.59095	12.0851	20.381	12.7454	5.91257	7.86661	25.8216	40.5738	19.8687	16.7307	EcR	Ecdysone receptor [Source:FlyBase;Acc:FBgn0000546]
FBgn0000547	1.10164	0.00333588	0.142692	0.654096	0.0090741	1.75449	2.48843	2.40067	3.26975	2.68256	ed	echinoid [Source:FlyBase;Acc:FBgn0000547]
FBgn0000556	22.8139	13.4846	28.745	19.4224	12.1719	14.7834	9.01467	48.3327	24.1594	11.4757	Ef1alpha48D	Elongation factor 1alpha48D [Source:FlyBase;Acc:FBgn0000556]
FBgn0000557	157.366	175.284	299.725	248.299	175.301	165.774	126.868	237.562	169.842	127.462	Ef1alpha100E	Elongation factor 1alpha100E [Source:FlyBase;Acc:FBgn0000557]
FBgn0000559	23.9763	26.6149	41.2229	29.1635	28.2964	25.0757	20.0772	69.051	19.887	23.0861	EF2	Elongation factor 2 [Source:FlyBase;Acc:FBgn0000559]
FBgn0000562	0.0169871	0	1.998	0.0284944	0.0120189	0.303737	0.218531	1.67505	0.467431	0.0339138	egl	egalitarian [Source:FlyBase;Acc:FBgn0000562]
FBgn0000565	1.98951	0.255925	0	1.27853	0	0.0851036	0.639851	0.511666	1.01568	0.180543	Eip71CD	Ecdysone-induced protein 28/29kD [Source:FlyBase;Acc:FBgn0000565]
FBgn0000566	1.16538	1.74677	6.65946	1.92579	0.039264	1.25339	3.37809	2.7718	5.8588	1.44067	Eip55E	Eip55E [Source:FlyBase;Acc:FBgn0000566]
FBgn0000567	19.8087	19.7557	72.3256	39.7161	30.1942	24.6514	33.81	79.3547	32.5215	26.0156	Eip74EF	Ecdysone-induced protein 74EF [Source:FlyBase;Acc:FBgn0000567]
FBgn0000568	75.9514	72.1433	167.478	138.766	71.0619	102.51	77.9644	202.732	90.0327	79.3011	Eip75B	Ecdysone-induced protein 75B [Source:FlyBase;Acc:FBgn0000568]
FBgn0000575	36.4072	45.7981	66.5114	47.6312	24.9095	39.3641	30.7016	54.8258	23.3162	22.3215	emc	extra macrochaetae [Source:FlyBase;Acc:FBgn0000575]
FBgn0000578	24.6406	24.1443	43.8304	28.3058	18.4496	21.2855	20.7344	27.3008	25.6691	20.9179	ena	enabled [Source:FlyBase;Acc:FBgn0000578]
FBgn0000579	9.20665	13.5936	15.5151	18.0498	3.11244	22.4385	23.253	54.4607	21.8713	13.4591	Eno	Enolase [Source:FlyBase;Acc:FBgn0000579]
FBgn0000581	3.14401	3.00256	8.79763	7.20909	5.39044	4.79644	3.20635	11.3162	4.46632	3.44796	E(Pc)	Enhancer of Polycomb [Source:FlyBase;Acc:FBgn0000581]
FBgn0000588	1.62726	0	0.16868	0.0272802	0.270315	0	0	0	0.381419	0.240124	esc	extra sexcombs [Source:FlyBase;Acc:FBgn0000588]
FBgn0000611	20.7554	11.594	14.4522	25.9531	13.0467	23.5014	19.0084	36.1558	16.9614	14.6661	exd	extradenticle [Source:FlyBase;Acc:FBgn0000611]
FBgn0000615	0.364154	0.118328	0.244599	0.0334665	0	0.287383	0.395911	0	0.0438672	0.0551387	exu	exuperantia [Source:FlyBase;Acc:FBgn0000615]
FBgn0000617	2.70591	0.210297	0	1.76916	0.249719	4.11863	0.340533	5.07295	0.515324	0.775095	e(y)1	enhancer of yellow 1 [Source:FlyBase;Acc:FBgn0000617]
FBgn0000618	15.4818	21.4115	4.63804	6.25081	1.37641	24.7149	19.3952	0	2.59457	9.30493	e(y)2	enhancer of yellow 2 [Source:FlyBase;Acc:FBgn0000618]
FBgn0000625	0	0	0	0	0.0184004	0.048948	0	0.0869293	0.0584173	0	eyg	eyegone [Source:FlyBase;Acc:FBgn0000625]
FBgn0000629	1.99843	1.28304	0.398892	0.447996	0.532696	2.10978	2.74648	2.79624	0.219229	1.14125	E(z)	Enhancer of zeste [Source:FlyBase;Acc:FBgn0000629]
FBgn0000633	1.27261	0.35226	0.183091	0.514665	0.0853836	31.0555	33.699	107.097	40.2485	32.6565	fas	faint sausage [Source:FlyBase;Acc:FBgn0000633]
FBgn0000635	235.691	208.375	580.337	460.09	277.976	266.482	194.96	700.314	254.5	197.154	Fas2	Fasciclin 2 [Source:FlyBase;Acc:FBgn0000635]
FBgn0000636	2.26659	7.89033	1.1444	4.3414	2.21219	10.8583	44.2938	101.078	34.932	47.4776	Fas3	Fasciclin 3 [Source:FlyBase;Acc:FBgn0000636]
FBgn0000644	0.346024	2.11901	0	0	1.77497	0	0.723355	0	0	0.374192	Fcp3C	Follicle cell protein 3C [Source:FlyBase;Acc:FBgn0000644]
FBgn0000658	0.00623514	0	0	0	0	0	0	0	0	0.0186721	fj	four-jointed [Source:FlyBase;Acc:FBgn0000658]
FBgn0000659	0	0	0	0	0	0	0.118007	3.79496	0	0	fkh	fork head [Source:FlyBase;Acc:FBgn0000659]
FBgn0000662	13.5669	12.0157	17.9192	12.8862	5.31047	13.2803	10.5023	8.0196	22.0139	3.75494	fl(2)d	female lethal d [Source:FlyBase;Acc:FBgn0000662]
FBgn0000667	1.91272	2.71419	3.7614	3.89176	2.26439	2.74696	1.26882	0	0.0636555	1.97539	Actn	alpha actinin [Source:FlyBase;Acc:FBgn0000667]
FBgn0000709	0.197879	0.393012	0.225165	0.459526	0.0572751	0.215845	0.151869	4.64506	1.24255	0.381586	fliI	flightless I [Source:FlyBase;Acc:FBgn0000709]
FBgn0000711	9.55031	7.05057	20.2395	19.7609	7.3841	17.8824	15.1992	65.8205	12.9345	9.66435	flw	flapwing [Source:FlyBase;Acc:FBgn0000711]
FBgn0000719	2.11916	5.29252	8.06723	2.21085	3.43354	0	0.393892	0	0	0.0567068	fog	folded gastrulation [Source:FlyBase;Acc:FBgn0000719]
FBgn0000723	0	0	0	0.24549	0	1.30175	0.469778	0	0	0	FER	FER ortholog (H. sapiens) [Source:FlyBase;Acc:FBgn0000723]
FBgn0000810	0.639027	2.69155	0.280191	3.49771	1.62144	1.20275	0.333082	4.56666	0.123743	0.175969	fs(1)K10	female sterile (1) K10 [Source:FlyBase;Acc:FBgn0000810]
FBgn0000826	2.30876	0	0.0567467	0.734199	0	0	0.528187	16.7075	0	0	png	pan gu [Source:FlyBase;Acc:FBgn0000826]
FBgn0000928	0.208859	1.11876	0.920456	0.085413	0	0	0.0305325	0	0.778367	0.0189534	fs(1)Yb	female sterile (1) Yb [Source:FlyBase;Acc:FBgn0000928]
FBgn0000964	18.6712	15.9631	32.845	33.4506	13.435	5.25158	8.11606	23.4278	10.0644	11.0839	tj	traffic jam [Source:FlyBase;Acc:FBgn0000964]
FBgn0000996	0.110163	0.313822	0.467749	1.21042	0.0907599	1.06792	0.228167	0	0	0.0671561	dup	double parked [Source:FlyBase;Acc:FBgn0000996]
FBgn0001075	0.0520818	0	0	0.0454231	0	0	0	0	0	0.051989	ft	fat [Source:FlyBase;Acc:FBgn0001075]
FBgn0001078	0.098196	0.00547992	0	0.234049	0	0.174552	0.0106483	0	0.00929652	0	ftz-f1	ftz transcription factor 1 [Source:FlyBase;Acc:FBgn0001078]
FBgn0001079	0	0	2.40361	1.98331	0.0291145	0	0.423492	0	0	0.691448	fu	fused [Source:FlyBase;Acc:FBgn0001079]
FBgn0001084	0.821707	2.99915	0	0.703336	0	1.89006	2.09436	0	2.18151	0	fy	fuzzy [Source:FlyBase;Acc:FBgn0001084]
FBgn0001085	11.8406	14.0105	30.775	23.7844	12.7012	18.9137	27.18	55.1728	21.0076	26.4442	fz	frizzled [Source:FlyBase;Acc:FBgn0001085]
FBgn0001086	0.112615	0	0	0.0908818	0.0250148	0.0665435	0.204671	0	0	0.0125212	fzy	fizzy [Source:FlyBase;Acc:FBgn0001086]
FBgn0001087	2.35468	1.47209	4.79912	4.03129	3.44181	2.50516	2.19958	4.14705	1.73475	2.02987	g	garnet [Source:FlyBase;Acc:FBgn0001087]
FBgn0001089	0	0	0.184534	0.0977088	0	0.0305459	0.269125	0	0	0.0105541	Gal	beta galactosidase [Source:FlyBase;Acc:FBgn0001089]
FBgn0001090	0.372252	0.575061	3.39073	4.15733	0.850921	2.26359	2.52626	1.00501	0.897483	2.58819	bnb	bangles and beads [Source:FlyBase;Acc:FBgn0001090]
FBgn0001091	11.3322	14.4905	10.2168	6.17038	6.50864	7.95801	21.2426	31.6084	32.5765	15.3806	Gapdh1	Glyceraldehyde 3 phosphate dehydrogenase 1 [Source:FlyBase;Acc:FBgn0001091]
FBgn0001092	76.5677	85.6223	101.697	128.26	31.4972	91.0019	96.0467	101.215	84.8598	78.8182	Gapdh2	Glyceraldehyde 3 phosphate dehydrogenase 2 [Source:FlyBase;Acc:FBgn0001092]
FBgn0001098	8.39773	8.92113	13.4019	12.5467	9.01137	8.34126	9.45106	1.62394	3.72189	7.71853	Gdh	Glutamate dehydrogenase [Source:FlyBase;Acc:FBgn0001098]
FBgn0001099	0	1.24313	0.822669	1.49679	0	0.225585	1.12532	0	0	0.186109	gdl	gonadal [Source:FlyBase;Acc:FBgn0001099]
FBgn0001104	0.872007	0	0.027	1.59382	0.33653	0	0.196678	0	0.209867	0.542621	Galphai	G protein alpha i subunit [Source:FlyBase;Acc:FBgn0001104]
FBgn0001105	92.666	101.247	193.263	159.361	79.1565	150.443	97.5336	232.351	119.336	101.526	Gbeta13F	G protein beta-subunit 13F [Source:FlyBase;Acc:FBgn0001105]
FBgn0001108	0	0.251945	1.19833	1.21819	0	1.1217	0.207835	0	0.258063	0.0716755	Gl	Glued [Source:FlyBase;Acc:FBgn0001108]
FBgn0001112	0.0310769	0.00771531	0.518644	0	0.0494727	0.263211	0.239872	0	0	0	Gld	Glucose dehydrogenase [Source:FlyBase;Acc:FBgn0001112]
FBgn0001114	0.348724	0.115435	0	0.461389	0.275761	0	0.263892	0	0	0.266197	Glt	Glutactin [Source:FlyBase;Acc:FBgn0001114]
FBgn0001120	0.0916398	0.0606694	0	0	0	0	0	0	0	0	gnu	giant nuclei [Source:FlyBase;Acc:FBgn0001120]
FBgn0001122	18.1054	14.8948	40.7098	30.4686	20.0213	12.6386	10.7422	10.2831	11.6008	11.6003	Galphao	G protein alpha o subunit [Source:FlyBase;Acc:FBgn0001122]
FBgn0001123	20.7045	12.2186	10.7592	14.1266	11.6809	27.4093	21.8494	27.902	17.6733	9.94519	Galphas	G protein alpha s subunit [Source:FlyBase;Acc:FBgn0001123]
FBgn0001124	21.4263	8.54038	2.46576	8.22481	0	2.27098	12.204	1.08031	9.48622	5.48907	Got1	Glutamate oxaloacetate transaminase 1 [Source:FlyBase;Acc:FBgn0001124]
FBgn0001125	0	0.592625	0	0	0	2.14794	1.69282	0	1.24348	0.0470292	Got2	Glutamate oxaloacetate transaminase 2 [Source:FlyBase;Acc:FBgn0001125]
FBgn0001128	0.112567	2.42463	4.55248	0.332852	2.43485	1.62726	0.802296	1.64329	0.0250979	0.879533	Gpdh	Glycerol 3 phosphate dehydrogenase [Source:FlyBase;Acc:FBgn0001128]
FBgn0001133	0.0125158	0.882454	0.0298395	0.9893	0.478186	1.44873	0.664161	6.65181	1.47597	0.61218	grau	grauzone [Source:FlyBase;Acc:FBgn0001133]
FBgn0001134	0.0539246	0.0535505	0.012843	0.425798	0.0457841	0.213138	0.0623687	0	0	0.366035	Grd	Glycine receptor [Source:FlyBase;Acc:FBgn0001134]
FBgn0001137	1.68537	0.436095	7.54374	1.28565	6.11458	0.226504	2.19546	0	0	1.33399	grk	gurken [Source:FlyBase;Acc:FBgn0001137]
FBgn0001138	54.6669	42.9923	62.0396	61.1009	55.4518	56.7461	34.6419	58.3844	24.2971	27.4969	grn	grain [Source:FlyBase;Acc:FBgn0001138]
FBgn0001139	8.74173	7.84458	7.68736	8.53227	5.58065	9.09834	5.23665	14.3452	5.56875	7.19289	gro	groucho [Source:FlyBase;Acc:FBgn0001139]
FBgn0001142	9.33164	6.93898	5.01016	7.08576	3.83261	6.48523	4.65407	5.57732	7.43385	8.59794	Gs1	Glutamine synthetase 1 [Source:FlyBase;Acc:FBgn0001142]
FBgn0001145	1.67289	2.09053	2.07273	1.75227	0.307556	2.33355	2.94458	0	0.44383	1.14395	Gs2	Glutamine synthetase 2 [Source:FlyBase;Acc:FBgn0001145]
FBgn0001149	1.4655	4.86292	0.170437	4.75485	4.93152	14.7765	23.1294	1.79216	32.939	18.1612	GstD1	Glutathione S transferase D1 [Source:FlyBase;Acc:FBgn0001149]
FBgn0001150	0.0142854	0.54753	0	0.596297	0	0.341693	0.986086	0	0	0	gt	giant [Source:FlyBase;Acc:FBgn0001150]
FBgn0001168	0.35948	0	1.97661	0	0	0.0922631	0.0315309	0	0	0	h	hairy [Source:FlyBase;Acc:FBgn0001168]
FBgn0001169	1.46697	1.12865	3.50614	2.26115	1.75728	0.988835	1.02664	0.74645	1.39314	0.978655	H	Hairless [Source:FlyBase;Acc:FBgn0001169]
FBgn0001179	0.837372	1.63601	0.542506	0.315857	0	1.23344	0.43909	0	0	0.0181713	hay	haywire [Source:FlyBase;Acc:FBgn0001179]
FBgn0001185	6.4815	6.11908	11.6276	6.89409	4.00771	7.89268	4.16746	4.32677	2.4221	1.12164	her	hermaphrodite [Source:FlyBase;Acc:FBgn0001185]
FBgn0001186	7.43088	9.37133	17.6911	9.00992	6.33607	3.88501	6.96093	11.0128	4.39888	6.41912	Hex-A	Hexokinase A [Source:FlyBase;Acc:FBgn0001186]
FBgn0001187	0.0827509	0.410884	0	0	0.421552	0	0	0	1.53351	0	Hex-C	Hexokinase C [Source:FlyBase;Acc:FBgn0001187]
FBgn0001189	0.166553	0.0841925	3.83916	0.413345	0.201069	0.594205	0.130522	3.25012	0.608925	0.80369	hfw	halfway [Source:FlyBase;Acc:FBgn0001189]
FBgn0001197	79.5196	105.925	77.1456	99.3817	29.0662	219.857	180.357	214.21	147.443	108.388	His2Av	Histone H2A variant [Source:FlyBase;Acc:FBgn0001197]
FBgn0001202	5.00772	9.73978	6.05267	6.89055	5.32525	8.17921	4.28411	16.6224	3.97506	4.94912	hk	hook [Source:FlyBase;Acc:FBgn0001202]
FBgn0001206	0.537049	0.63447	1.55636	0.383806	0.275157	0.810388	0.500296	2.46059	0.202792	0.554579	Hmr	Hybrid male rescue [Source:FlyBase;Acc:FBgn0001206]
FBgn0001208	0	0	0	0	0	0.909636	0.248261	0	0	0	Hn	Henna [Source:FlyBase;Acc:FBgn0001208]
FBgn0001215	39.6158	31.7802	75.0497	68.4392	31.4858	58.4233	43.7208	93.0646	43.3689	29.301	Hrb98DE	Heterogeneous nuclear ribonucleoprotein at 98DE [Source:FlyBase;Acc:FBgn0001215]
FBgn0001216	0.556444	0.117197	0.511578	0.330944	0.523773	0	0	0	1.66287	0	Hsc70-1	Heat shock protein cognate 1 [Source:FlyBase;Acc:FBgn0001216]
FBgn0001218	17.9556	16.6017	28.9048	29.5081	14.3617	16.6047	26.7455	47.6974	23.0295	21.445	Hsc70-3	Heat shock 70-kDa protein cognate 3 [Source:FlyBase;Acc:FBgn0001218]
FBgn0001220	7.45945	4.88217	6.06333	8.99408	4.95116	4.34457	3.64937	2.31472	5.66263	2.33653	Hsc70-5	Heat shock protein cognate 5 [Source:FlyBase;Acc:FBgn0001220]
FBgn0001222	9.5295	8.11543	8.92159	13.2307	6.95509	8.94637	3.3081	9.67096	6.4203	4.27961	Hsf	Heat shock factor [Source:FlyBase;Acc:FBgn0001222]
FBgn0001223	293.565	423.812	276.902	238.487	213.156	575.841	370.874	531.214	289.391	390.112	Hsp22	Heat shock protein 22 [Source:FlyBase;Acc:FBgn0001223]
FBgn0001224	776.287	1031.31	414.39	458.695	220.294	1330.3	1220.07	883.306	688.272	706.365	Hsp23	Heat shock protein 23 [Source:FlyBase;Acc:FBgn0001224]
FBgn0001225	503.241	593.412	672.526	576.075	470.478	748.256	600.024	1053.25	592.683	483.995	Hsp26	Heat shock protein 26 [Source:FlyBase;Acc:FBgn0001225]
FBgn0001226	129.722	154.237	141.999	124.977	93.9975	139.02	218.487	291.134	175.225	126.531	Hsp27	Heat shock protein 27 [Source:FlyBase;Acc:FBgn0001226]
FBgn0001227	23.803	26.4558	32.3216	16.4328	13.6201	24.4431	45.0958	54.8234	31.863	33.1429	Hsp67Ba	Heat shock gene 67Ba [Source:FlyBase;Acc:FBgn0001227]
FBgn0001228	8.53193	4.82423	0	11.3727	1.01202	11.7558	8.07087	40.6201	0.055824	3.6947	Hsp67Bb	Heat shock gene 67Bb [Source:FlyBase;Acc:FBgn0001228]
FBgn0001229	1071.55	1243.83	1038.32	1119.41	733.914	1393.68	1062.94	1464.92	1296.8	987.348	Hsp67Bc	Heat shock gene 67Bc [Source:FlyBase;Acc:FBgn0001229]
FBgn0001230	55.2052	64.7972	160.161	69.1824	56.2467	91.9103	60.6156	121.718	55.0205	44.8364	Hsp68	Heat shock protein 68 [Source:FlyBase;Acc:FBgn0001230]
FBgn0001233	37.5003	43.4137	76.398	66.0148	22.6309	74.7567	52.7649	107.586	31.7291	39.5771	Hsp83	Heat shock protein 83 [Source:FlyBase;Acc:FBgn0001233]
FBgn0001235	7.55517	5.86846	34.2746	24.8465	13.4731	11.9875	9.50734	46.6307	8.27729	5.83666	hth	homothorax [Source:FlyBase;Acc:FBgn0001235]
FBgn0001247	4.26531	7.40271	9.90727	7.93853	1.20554	8.47288	4.32063	12.1027	5.52355	4.38094	Ide	Insulin degrading metalloproteinase [Source:FlyBase;Acc:FBgn0001247]
FBgn0001248	0.361465	3.02888	1.93902	3.93776	6.42566	2.29612	2.92815	7.24941	0.0507466	2.9194	Idh	Isocitrate dehydrogenase [Source:FlyBase;Acc:FBgn0001248]
FBgn0001250	0.0189441	0	0	0.0213823	0	0.0322921	0.0147144	0	0	0	if	inflated [Source:FlyBase;Acc:FBgn0001250]
FBgn0001253	0.380214	0	0	0	0	0	0.0239992	0.0178164	0	0	ImpE1	Ecdysone-inducible gene E1 [Source:FlyBase;Acc:FBgn0001253]
FBgn0001256	11.4129	0.720526	0.324334	0	0	0	0.763178	0	0.0763944	0.543189	ImpL1	Ecdysone-inducible gene L1 [Source:FlyBase;Acc:FBgn0001256]
FBgn0001257	0	0	0.105034	0	0.187022	0	0.0848908	0	0	0	ImpL2	Ecdysone-inducible gene L2 [Source:FlyBase;Acc:FBgn0001257]
FBgn0001258	0.0180284	0.513517	0	0	0	0	0	0	0	0.0179963	ImpL3	Ecdysone-inducible gene L3 [Source:FlyBase;Acc:FBgn0001258]
FBgn0001259	0	0	0.139597	0	0.481595	0.268622	0	0	0	0	in	inturned [Source:FlyBase;Acc:FBgn0001259]
FBgn0001263	0	0.206223	0	0	0	0	0.00954104	0	0.516448	0.355362	inaD	inactivation no afterpotential D [Source:FlyBase;Acc:FBgn0001263]
FBgn0001276	3.57498	3.72127	0	2.90636	0	5.35049	3.15836	0	8.05454	3.00967	ix	intersex [Source:FlyBase;Acc:FBgn0001276]
FBgn0001280	11.4116	17.121	6.23493	6.87517	6.78849	13.6439	24.6706	26.9396	0.420938	29.2739	janA	janus A [Source:FlyBase;Acc:FBgn0001280]
FBgn0001281	0	0	0	0	0	0	1.34288	0	0	0.141757	janB	janus B [Source:FlyBase;Acc:FBgn0001281]
FBgn0001291	4.74372	3.3168	3.50064	1.7731	5.1715	7.2885	3.8608	0.809002	1.65815	2.96358	Jra	Jun-related antigen [Source:FlyBase;Acc:FBgn0001291]
FBgn0001296	0.221985	0.572943	0	0	0	0.603277	0.247404	6.53549	1.00798	0	kar	karmoisin [Source:FlyBase;Acc:FBgn0001296]
FBgn0001297	0.545296	1.03889	15.0341	1.42866	0	1.44731	0.577253	1.01651	2.01399	0.092409	kay	kayak [Source:FlyBase;Acc:FBgn0001297]
FBgn0001301	4.65968	3.9037	7.7944	9.68206	4.39768	4.64828	2.80846	22.7114	9.49582	3.5072	kel	kelch [Source:FlyBase;Acc:FBgn0001301]
FBgn0001308	2.77163	1.60901	7.48529	4.14204	3.02341	3.31764	2.81733	2.46987	2.74963	2.57712	Khc	Kinesin heavy chain [Source:FlyBase;Acc:FBgn0001308]
FBgn0001311	0.55824	0	0	0.495395	0	0	0.0114426	0	0	0.0236771	kkv	krotzkopf verkehrt [Source:FlyBase;Acc:FBgn0001311]
FBgn0001316	8.05854	7.63623	15.0911	9.82931	6.24751	11.411	8.57614	27.7914	13.3219	12.9745	klar	klarsicht [Source:FlyBase;Acc:FBgn0001316]
FBgn0001319	0.0691918	0	0	0	0	0.455803	0	0	0	0	kn	knot [Source:FlyBase;Acc:FBgn0001319]
FBgn0001321	0.0254702	0.0252935	0	0.114577	0	0.0239694	0.0491491	0	0	0	knk	knickkopf [Source:FlyBase;Acc:FBgn0001321]
FBgn0001323	0.0112505	0	0	0	0	0	0	0	0	0.0168457	knrl	knirps-like [Source:FlyBase;Acc:FBgn0001323]
FBgn0001324	0.433	0.0554833	0.965734	2.82749	1.60098	0.788681	0.498633	0.420198	0.682411	0.515885	kto	kohtalo [Source:FlyBase;Acc:FBgn0001324]
FBgn0001330	0	0	0.0562267	0	0.963622	0	0.0853283	0	0	0.0941662	kz	kurz [Source:FlyBase;Acc:FBgn0001330]
FBgn0001341	0	0.0297954	0.858396	0.19667	0.292953	0.37271	0.231588	0	0.0101094	0.491182	l(1)1Bi	lethal (1) 1Bi [Source:FlyBase;Acc:FBgn0001341]
FBgn0001404	6.23073	8.66108	11.5714	8.33765	4.41354	6.26386	7.3489	16.8886	5.16286	4.58254	egh	egghead [Source:FlyBase;Acc:FBgn0001404]
FBgn0001491	13.946	19.4606	9.81719	15.0658	5.99691	19.5167	12.1797	14.015	3.69639	3.06026	l(1)10Bb	lethal (1) 10Bb [Source:FlyBase;Acc:FBgn0001491]
FBgn0001565	2.18617	1.55072	1.26008	0.277895	0.655396	1.0852	1.62253	5.23972	0	0.45564	Hlc	Helicase [Source:FlyBase;Acc:FBgn0001565]
FBgn0001612	0.165862	0.498523	2.57103	0.133139	0.039465	0.369342	0.403012	0	0.104411	0	Grip91	Gamma-tubulin ring protein 91 [Source:FlyBase;Acc:FBgn0001612]
FBgn0001624	44.4165	39.8448	119.484	84.8029	48.72	68.1435	72.3065	212.016	53.188	50.6905	dlg1	discs large 1 [Source:FlyBase;Acc:FBgn0001624]
FBgn0001941	0.10243	2.58658	0.104661	1.32591	4.19305	0	3.33878	0	0.024652	0.160675	ifc	infertile crescent [Source:FlyBase;Acc:FBgn0001941]
FBgn0001942	49.3297	55.2758	35.6141	48.0635	22.5632	50.0955	41.6418	57.8449	40.3036	35.0661	eIF-4a	Eukaryotic initiation factor 4a [Source:FlyBase;Acc:FBgn0001942]
FBgn0001961	2.2085	1.02444	15.2766	7.56317	1.38782	7.69756	3.07145	8.15921	8.88551	2.7557	Arpc1	Actin-related protein 2/3 complex, subunit 1 [Source:FlyBase;Acc:FBgn0001961]
FBgn0001965	1.69723	2.11061	4.07379	2.40986	2.06902	2.73038	1.19128	3.3924	1.0497	2.38486	Sos	Son of sevenless [Source:FlyBase;Acc:FBgn0001965]
FBgn0001970	1.82074	1.31596	0	0.124624	0.617438	2.25081	1.81909	0	2.79515	2.16165	Pgant35A	Polypeptide N-acetylgalactosaminyltransferase 35A [Source:FlyBase;Acc:FBgn0001970]
FBgn0001974	1.59831	0.107608	2.26054	2.27188	0	2.4474	1.79041	0.475395	0.0456386	2.20391	l(2)35Bd	lethal (2) 35Bd [Source:FlyBase;Acc:FBgn0001974]
FBgn0001977	2.32761	1.9452	0.155799	0.759384	2.09284	1.79145	2.53493	1.61524	4.65431	3.0014	CIAPIN1	CIAPIN1 ortholog [Source:FlyBase;Acc:FBgn0001977]
FBgn0001978	0.00532938	0.894424	3.11286	1.89043	0.893617	0.78233	0.930694	3.39331	1.14022	0.312917	stc	shuttle craft [Source:FlyBase;Acc:FBgn0001978]
FBgn0001981	1.37324	0	0	0	0	0	0.255176	0	0	0	esg	escargot [Source:FlyBase;Acc:FBgn0001981]
FBgn0001986	0.0246864	0.484173	0.132426	1.08274	1.16588	0.662104	0.33941	0.185663	0	0.0492848	l(2)35Df	lethal (2) 35Df [Source:FlyBase;Acc:FBgn0001986]
FBgn0001987	2.94725	4.5977	2.39383	4.32812	2.82659	7.28521	3.61986	2.91172	5.42701	0.910636	Gli	Gliotactin [Source:FlyBase;Acc:FBgn0001987]
FBgn0001989	34.6564	35.1699	15.8651	60.357	2.2751	28.2433	27.9222	98.3023	34.6101	18.3673	l(2)35Di	lethal (2) 35Di [Source:FlyBase;Acc:FBgn0001989]
FBgn0001990	0	0.417467	0	0.908361	0.636421	0.967419	0.23383	7.8249	0.511331	0.228036	wek	weckle [Source:FlyBase;Acc:FBgn0001990]
FBgn0001991	3.40732	4.77678	8.22796	7.65798	2.84611	2.70749	1.21648	4.01619	2.28312	1.2511	Ca-alpha1D	Ca[2+]-channel protein alpha[[1]] subunit D [Source:FlyBase;Acc:FBgn0001991]
FBgn0001992	0.00811206	0	0.0580212	0.172033	0	0.923599	0.440672	0	0	0.0971715	Cyp303a1	Cyp303a1 [Source:FlyBase;Acc:FBgn0001992]
FBgn0001994	18.5158	19.432	31.9951	33.5239	16.5838	18.1554	17.4539	29.2607	18.2393	20.1201	crp	cropped [Source:FlyBase;Acc:FBgn0001994]
FBgn0001995	4.09744	8.45341	11.2376	6.22656	3.6605	9.64851	7.9695	0	0.181836	6.03157	mRpL4	mitochondrial ribosomal protein L4 [Source:FlyBase;Acc:FBgn0001995]
FBgn0002021	6.66739	2.03195	3.43164	3.94478	2.45612	3.98395	2.20565	10.7544	0.14293	1.11281	l(2)37Bb	lethal (2) 37Bb [Source:FlyBase;Acc:FBgn0002021]
FBgn0002022	3.13038	4.282	0.717787	0.986706	0	2.82064	2.05449	0	2.5819	0.0143585	Catsup	Catecholamines up [Source:FlyBase;Acc:FBgn0002022]
FBgn0002031	13.923	9.8267	6.71625	3.7943	3.28975	3.55872	5.8082	0	4.95504	5.8987	l(2)37Cc	lethal (2) 37Cc [Source:FlyBase;Acc:FBgn0002031]
FBgn0002036	1.92216	1.71043	3.13083	5.6578	3.09944	0.548052	1.11075	0	0	0.710328	CG10561	Protein anon-37Cs [Source:UniProtKB/Swiss-Prot;Acc:P18487]
FBgn0002044	4.38278	5.67955	9.99464	5.89324	2.79241	4.90773	4.18142	7.12407	4.20759	3.77851	swm	second mitotic wave missing [Source:FlyBase;Acc:FBgn0002044]
FBgn0002069	3.93132	5.53889	0.176548	7.28901	3.74991	2.10807	1.75792	0	2.60907	1.45499	Aats-asp	Aspartyl-tRNA synthetase [Source:FlyBase;Acc:FBgn0002069]
FBgn0002121	0.149099	0	0.0710949	0.0694737	0.623524	0.350428	0.177706	0	0.186596	0.0212619	l(2)gl	lethal (2) giant larvae [Source:FlyBase;Acc:FBgn0002121]
FBgn0002174	0.961117	1.01242	0.229642	0	1.25103	1.04524	0.386667	0	0	1.70113	l(2)tid	lethal (2) tumorous imaginal discs [Source:FlyBase;Acc:FBgn0002174]
FBgn0002183	0.341046	0.213903	0	0.895592	0.711203	0.287166	0.248233	0	0.344349	0.0298631	dre4	dre4 [Source:FlyBase;Acc:FBgn0002183]
FBgn0002283	15.0402	7.57595	14.6767	0.877768	1.30329	10.7923	6.24656	23.1743	12.3293	10.9874	l(3)73Ah	lethal (3) 73Ah [Source:FlyBase;Acc:FBgn0002283]
FBgn0002284	16.7077	20.2397	6.28582	17.9902	10.5637	16.3087	25.7809	5.79268	13.6745	18.0974	Prosbeta6	Proteasome beta6 subunit [Source:FlyBase;Acc:FBgn0002284]
FBgn0002306	0.912203	0.697486	0.947708	1.01498	0.572881	0	0	0	0	0	sas	stranded at second [Source:FlyBase;Acc:FBgn0002306]
FBgn0002354	10.2942	20.3102	8.93949	6.57163	17.2199	8.27618	8.68247	42.0434	15.3902	19.3949	l(3)87Df	lethal (3) 87Df [Source:FlyBase;Acc:FBgn0002354]
FBgn0002413	5.65677	3.49445	14.2088	11.802	7.08028	10.3671	6.7124	17.863	8.75234	4.51758	dco	discs overgrown [Source:FlyBase;Acc:FBgn0002413]
FBgn0002431	5.41531	5.21085	10.0575	8.46072	4.677	6.02459	5.43591	14.8855	6.35501	5.30711	hyd	hyperplastic discs [Source:FlyBase;Acc:FBgn0002431]
FBgn0002441	1.03162	0	1.50021	0.824842	0.845824	1.06114	0.239191	0.970913	2.31729	0.203562	l(3)mbt	lethal (3) malignant brain tumor [Source:FlyBase;Acc:FBgn0002441]
FBgn0002466	0.00707057	0.129899	0	0	0	0.00997999	0.173959	0	0	0.112924	sti	sticky [Source:FlyBase;Acc:FBgn0002466]
FBgn0002521	51.6328	55.4801	37.4115	27.2161	22.0792	61.3559	33.208	77.3403	16.4165	42.5535	pho	pleiohomeotic [Source:FlyBase;Acc:FBgn0002521]
FBgn0002524	2.50797	2.27422	5.29885	1.97177	1.9066	2.4104	0.926721	3.29975	2.66695	0.7546	lace	lace [Source:FlyBase;Acc:FBgn0002524]
FBgn0002525	7.52764	7.12046	15.4075	10.7225	4.73847	10.4747	9.44477	22.2945	9.61072	11.4176	Lam	Lamin [Source:FlyBase;Acc:FBgn0002525]
FBgn0002543	0	0	0	0	0	0	0.0933698	0	0.0931618	0	lea	leak [Source:FlyBase;Acc:FBgn0002543]
FBgn0002552	0	0.305518	0	0.499475	0	0	0	3.18326	0	0.274778	lin	lines [Source:FlyBase;Acc:FBgn0002552]
FBgn0002565	0.0200374	0.146826	0	0	0.765563	0	0	0	0.776411	0.0276729	Lsp2	Larval serum protein 2 [Source:FlyBase;Acc:FBgn0002565]
FBgn0002566	5.75349	11.5476	10.3802	5.8568	2.90643	7.27994	7.74022	12.7854	8.11812	5.68693	lt	light [Source:FlyBase;Acc:FBgn0002566]
FBgn0002567	2.26771	2.29149	0	0.312213	1.8392	1.06704	1.29037	0	6.13284	0	ltd	lightoid [Source:FlyBase;Acc:FBgn0002567]
FBgn0002579	681.809	780.727	349.494	362.006	478.786	644.9	612.281	390.853	503.7	482.12	RpL36	Ribosomal protein L36 [Source:FlyBase;Acc:FBgn0002579]
FBgn0002590	236.902	289.328	180.478	211.15	171.916	196.848	165.482	277.611	132.671	135.018	RpS5a	Ribosomal protein S5a [Source:FlyBase;Acc:FBgn0002590]
FBgn0002593	232.438	205.444	220.607	244.583	172.072	124.343	117.663	178.597	115.979	124.069	RpLP1	Ribosomal protein LP1 [Source:FlyBase;Acc:FBgn0002593]
FBgn0002607	309.396	372.021	162.973	206.935	233.532	243.186	247.559	170.348	203.177	208.239	RpL19	Ribosomal protein L19 [Source:FlyBase;Acc:FBgn0002607]
FBgn0002609	0.11698	0	0.697243	0	0	0	0	0	0	0	E(spl)m3-HLH	Enhancer of split m3, helix-loop-helix [Source:FlyBase;Acc:FBgn0002609]
FBgn0002622	143.098	129.467	88.8415	80.5662	82.4177	109.43	128.314	111.76	145.907	93.3152	RpS3	Ribosomal protein S3 [Source:FlyBase;Acc:FBgn0002622]
FBgn0002626	208.408	340.604	147.793	191.102	221.206	225.951	260.188	186.938	282.78	256.635	RpL32	Ribosomal protein L32 [Source:FlyBase;Acc:FBgn0002626]
FBgn0002638	1.30079	1.9822	6.49667	1.49172	1.21391	0.949767	1.12522	1.40562	0.755671	0.481332	Rcc1	Regulator of chromosome condensation 1 ortholog (H. sapiens) [Source:FlyBase;Acc:FBgn0002638]
FBgn0002641	0	0	0	0	1.43339	0	0.0794578	0	0	0.435697	mal	maroon-like [Source:FlyBase;Acc:FBgn0002641]
FBgn0002643	11.692	11.813	36.0864	26.6611	16.7028	12.5499	8.00466	18.2481	8.68414	7.62697	mam	mastermind [Source:FlyBase;Acc:FBgn0002643]
FBgn0002645	8.34406	9.11898	24.8175	21.3951	7.30571	8.31426	6.23474	16.4973	8.45492	7.53577	Map205	Microtubule-associated protein 205 [Source:FlyBase;Acc:FBgn0002645]
FBgn0002673	0.817567	1.44193	0.975047	0.0797441	0.421823	1.23537	2.62255	0	0	0.185151	twe	twine [Source:FlyBase;Acc:FBgn0002673]
FBgn0002707	0	0	0	0	0	0	0.784789	0	0	0.17754	mei-9	meiotic 9 [Source:FlyBase;Acc:FBgn0002707]
FBgn0002709	0	0.151245	0	0	0.282888	0.312714	0.0358841	0	0	0.0103657	mei-218	meiotic 218 [Source:FlyBase;Acc:FBgn0002709]
FBgn0002715	0.0459221	3.38986	0	0	0	0	1.78706	0	0	0.0305602	mei-S332	meiotic from via Salaria 332 [Source:FlyBase;Acc:FBgn0002715]
FBgn0002716	5.94378	0	11.068	0	0	1.58222	4.002	31.5345	8.87658	6.02901	mei-W68	meiotic W68 [Source:FlyBase;Acc:FBgn0002716]
FBgn0002719	1.9761	2.11706	0	0.375344	0.413247	1.04434	2.72373	2.00112	0.131197	1.48672	Men	Malic enzyme [Source:FlyBase;Acc:FBgn0002719]
FBgn0002723	0.604679	1.85392	4.53489	3.2483	2.99065	1.87289	2.31667	0.0639979	3.0561	1.34785	Met	Methoprene-tolerant [Source:FlyBase;Acc:FBgn0002723]
FBgn0002733	6.15676	0.0560921	1.818	0	0.539517	0	0.517729	0	2.42654	0	E(spl)mbeta-HLH	Enhancer of split mbeta, helix-loop-helix [Source:FlyBase;Acc:FBgn0002733]
FBgn0002734	0	0.0267612	0	0	0	0.304323	0	0	0	0	E(spl)mdelta-HLH	Enhancer of split mdelta, helix-loop-helix [Source:FlyBase;Acc:FBgn0002734]
FBgn0002736	25.0284	31.4929	19.4295	10.5977	3.2734	30.9656	37.8458	16.681	16.0617	45.4593	mago	mago nashi [Source:FlyBase;Acc:FBgn0002736]
FBgn0002773	0.252681	0	0	0	0	0	0	0	0	0.0403569	Mlc2	Myosin light chain 2 [Source:FlyBase;Acc:FBgn0002773]
FBgn0002774	1.07303	1.54398	0.883757	2.2402	0.630356	1.70384	1.89348	1.17616	1.44292	1.17399	mle	maleless [Source:FlyBase;Acc:FBgn0002774]
FBgn0002775	2.51942	3.46415	0	5.55835	1.19889	3.50557	4.36695	0.542271	7.30409	3.96463	msl-3	male-specific lethal 3 [Source:FlyBase;Acc:FBgn0002775]
FBgn0002778	20.8978	16.3673	39.0419	24.997	27.9628	16.4236	11.3631	38.6462	17.7856	15.0981	mnd	minidiscs [Source:FlyBase;Acc:FBgn0002778]
FBgn0002780	9.06856	7.69857	4.77904	7.00732	4.30601	11.4888	5.20786	9.08169	5.12651	3.41123	mod	modulo [Source:FlyBase;Acc:FBgn0002780]
FBgn0002781	442.761	208.046	218.426	331.545	148.369	106.719	216.258	1103.09	117.059	70.2442	mod(mdg4)	modifier of mdg4 [Source:FlyBase;Acc:FBgn0002781]
FBgn0002783	2.74939	0.74463	0.512755	1.9723	0.0863654	0.689238	1.6993	2.68126	1.67203	1.8053	mor	moira [Source:FlyBase;Acc:FBgn0002783]
FBgn0002787	1.97867	1.79555	2.48074	1.05233	0.724124	1.63735	3.64197	8.29592	1.03452	0.561896	Rpn8	Regulatory particle non-ATPase 8 [Source:FlyBase;Acc:FBgn0002787]
FBgn0002791	2.40168	0.274854	0.106431	0.292617	0.416921	1.26032	0.206742	0	0	0	mr	morula [Source:FlyBase;Acc:FBgn0002791]
FBgn0002863	26.5153	106.587	0	24.9877	4.00614	0	21.0012	0	0	71.7286	Acp95EF	Accessory gland protein 95EF [Source:FlyBase;Acc:FBgn0002863]
FBgn0002868	97.203	83.7603	30.0413	29.7458	97.703	18.8759	37.9606	64.4666	31.6252	49.0284	MtnA	Metallothionein A [Source:FlyBase;Acc:FBgn0002868]
FBgn0002872	0.0675054	0.122413	0.669412	0.916987	0.0150449	0.561007	0.472191	0.678243	0.647216	0.727419	mu2	mutator 2 [Source:FlyBase;Acc:FBgn0002872]
FBgn0002873	0.00300649	0.0208994	0	0	0.512063	0.016976	0.0145038	0	0	0	mud	mushroom body defect [Source:FlyBase;Acc:FBgn0002873]
FBgn0002878	0.187208	0	0	0	0.274372	0.314601	0.236533	0.960993	0	0.00889879	mus101	mutagen-sensitive 101 [Source:FlyBase;Acc:FBgn0002878]
FBgn0002887	0.171761	0.119399	0.245703	0.640204	0.0729158	0.549576	0.0994327	0.631543	0.019291	0.388632	mus201	mutagen-sensitive 201 [Source:FlyBase;Acc:FBgn0002887]
FBgn0002891	0	0.35642	0.00941888	0.0426527	0.0941105	0.0428817	0.0504681	0.0598516	0.0215171	0	mus205	mutagen-sensitive 205 [Source:FlyBase;Acc:FBgn0002891]
FBgn0002899	0	0.0853267	0	0.853742	0	0	0.00637703	0	0	0	mus301	mutagen-sensitive 301 [Source:FlyBase;Acc:FBgn0002899]
FBgn0002901	0	0.461957	0	0.0618506	0	0	0.123814	0	0	0.0640491	mus304	mutagen-sensitive 304 [Source:FlyBase;Acc:FBgn0002901]
FBgn0002905	0.298913	0.342362	0.0162298	0.0718123	0.187691	0.135613	0.358694	0.106439	0	0.0300629	mus308	mutagen-sensitive 308 [Source:FlyBase;Acc:FBgn0002905]
FBgn0002906	0.844254	0.292103	0	0.574877	0.844979	0.0382658	0.498448	0	0.868944	0.0316094	Blm	Bloom syndrome helicase ortholog [Source:FlyBase;Acc:FBgn0002906]
FBgn0002909	0.0610121	0.143706	0	0	0.424	0.0743254	0.050451	0	0	0	mus312	mutagen-sensitive 312 [Source:FlyBase;Acc:FBgn0002909]
FBgn0002914	6.35396	5.11522	7.01801	11.2871	3.12515	7.56472	5.35137	8.10695	2.91967	4.9472	Myb	Myb oncogene-like [Source:FlyBase;Acc:FBgn0002914]
FBgn0002917	1.46597	2.17164	1.33239	2.14963	1.03722	2.28662	2.08907	2.06261	2.29689	1.29089	na	narrow abdomen [Source:FlyBase;Acc:FBgn0002917]
FBgn0002921	155.409	138.673	432.322	341.81	148.346	212.831	143.552	491.334	199.919	160.248	Atpalpha	Na pump alpha subunit [Source:FlyBase;Acc:FBgn0002921]
FBgn0002924	0	0.212579	0	0.514084	0	0.715712	0.280834	0	0	0.501748	ncd	non-claret disjunctional [Source:FlyBase;Acc:FBgn0002924]
FBgn0002926	0	0	0	0	0	0.0728302	0.0273786	0	0	0.224032	ndl	nudel [Source:FlyBase;Acc:FBgn0002926]
FBgn0002930	0	0	0	0	0	0.335987	0	0	0	0.148495	nec	necrotic [Source:FlyBase;Acc:FBgn0002930]
FBgn0002931	0	0	0	0	0.340205	0	0.834387	0.949732	0	0	net	net [Source:FlyBase;Acc:FBgn0002931]
FBgn0002932	0.387716	0.584826	5.79976	2.85392	0.0498752	4.1776	2.46779	18.7825	0.407971	1.90338	neur	neuralized [Source:FlyBase;Acc:FBgn0002932]
FBgn0002936	0	0	1.65724	0.084616	2.2154	0.690784	0	0	2.14965	0	ninaA	neither inactivation nor afterpotential A [Source:FlyBase;Acc:FBgn0002936]
FBgn0002940	0	0.503887	0	1.98611	0.032637	0	0.311541	0	0	0.0460458	ninaE	neither inactivation nor afterpotential E [Source:FlyBase;Acc:FBgn0002940]
FBgn0002945	1.64228	0.919405	3.28641	1.51219	0.5826	0.157603	0.305234	6.39096	0.344851	0.510835	nkd	naked cuticle [Source:FlyBase;Acc:FBgn0002945]
FBgn0002948	1.03665	1.46224	0.671247	0.932494	0.552161	0.450324	1.43755	0.995819	0.94763	0.482301	nod	no distributive disjunction [Source:FlyBase;Acc:FBgn0002948]
FBgn0002973	5.28134	2.92315	10.8158	3.96152	8.19196	2.19967	1.65383	6.11741	0.448462	1.10085	numb	numb [Source:FlyBase;Acc:FBgn0002973]
FBgn0002989	0.0239615	0	0	0.0892404	0.249339	0.0303551	0	0	0	0.24634	okr	okra [Source:FlyBase;Acc:FBgn0002989]
FBgn0003002	0	0	0	1.07716	0	0	0	0	0	0.106961	opa	odd paired [Source:FlyBase;Acc:FBgn0003002]
FBgn0003008	18.4005	14.0697	24.2009	13.5536	15.4552	3.44299	10.7628	3.23713	37.3441	6.12256	or	orange [Source:FlyBase;Acc:FBgn0003008]
FBgn0003011	0.226483	1.31734	0.0514258	2.80697	0.022892	6.45504	1.30071	0.757045	0.0181694	1.72252	ort	ora transientless [Source:FlyBase;Acc:FBgn0003011]
FBgn0003016	7.58233	9.49426	17.3537	9.33482	8.94243	7.99859	5.52328	16.7843	7.68312	5.44795	osp	outspread [Source:FlyBase;Acc:FBgn0003016]
FBgn0003028	0	0	0.00931599	0.0150665	0	0	0.324623	0.9404	0	0	ovo	ovo [Source:FlyBase;Acc:FBgn0003028]
FBgn0003041	0	0.00870395	0	0	0.018604	0.0509279	0.124204	0	5.7735	0.338205	pbl	pebble [Source:FlyBase;Acc:FBgn0003041]
FBgn0003042	1.62809	2.85389	7.58581	3.08056	1.26383	1.85757	1.57982	3.82501	0.360489	0.38076	Pc	Polycomb [Source:FlyBase;Acc:FBgn0003042]
FBgn0003044	4.8099	3.48094	8.66571	5.9227	4.60788	2.82546	2.59415	12.8568	2.52486	2.23659	Pcl	Polycomblike [Source:FlyBase;Acc:FBgn0003044]
FBgn0003048	0.802622	0.573045	0.566984	1.10238	0.233833	0.330763	1.05615	1.81487	0.238619	0.315939	pcx	pecanex [Source:FlyBase;Acc:FBgn0003048]
FBgn0003053	0	0	0.00805348	0	0.0339958	0	0.00977741	0	0	0	peb	pebbled [Source:FlyBase;Acc:FBgn0003053]
FBgn0003062	0.250374	0	0	0.928266	0.163521	0.489366	0.631797	8.4012	0	0.230703	Fib	Fibrillarin [Source:FlyBase;Acc:FBgn0003062]
FBgn0003068	0.166986	0.597405	0	0.230221	0	0.0138659	0.0603641	0	0	0	per	period [Source:FlyBase;Acc:FBgn0003068]
FBgn0003071	0.0142777	0.0708931	0.119141	0	0	0.27449	0.704361	0	0.317491	1.61521	Pfk	Phosphofructokinase [Source:FlyBase;Acc:FBgn0003071]
FBgn0003074	1.9695	0.252041	0	3.15114	1.14208	0.286616	1.07746	0	2.6852	0.496566	Pgi	Phosphoglucose isomerase [Source:FlyBase;Acc:FBgn0003074]
FBgn0003076	0	1.23135	0.153971	0	0	1.02103	1.27112	0.0647607	0.348159	1.14749	Pgm	phosphoglucose mutase [Source:FlyBase;Acc:FBgn0003076]
FBgn0003079	0.0412043	1.36395	1.11336	0.675225	0.189497	0.159926	1.32518	0.542221	3.05434	0.171379	phl	pole hole [Source:FlyBase;Acc:FBgn0003079]
FBgn0003082	0	0.170107	0	0	0	0	0	0	0	0.0138117	phr	photorepair [Source:FlyBase;Acc:FBgn0003082]
FBgn0003086	0	0	0	1.71011	0	0	0.540529	0	0	0	Pig1	Pre-intermoult gene 1 [Source:FlyBase;Acc:FBgn0003086]
FBgn0003089	0.615029	0	0.261095	0	0	0.042583	0.0134674	0	0	0	pip	pipe [Source:FlyBase;Acc:FBgn0003089]
FBgn0003090	0	0	0	0	0	0.397037	0.0359357	0	0.341462	0.740076	pk	prickle [Source:FlyBase;Acc:FBgn0003090]
FBgn0003091	8.73471	5.17486	8.21571	12.6708	4.76833	0	0.592105	0	0	0.0258621	Pkc53E	Protein C kinase 53E [Source:FlyBase;Acc:FBgn0003091]
FBgn0003093	8.92945	6.73526	30.1674	16.1542	8.66569	11.3499	9.80309	45.5731	14.8135	7.57457	Pkc98E	Protein C kinase 98E [Source:FlyBase;Acc:FBgn0003093]
FBgn0003116	3.38644	2.32458	0	3.79729	0.0314621	2.28515	3.67041	0.222956	0	0	pn	prune [Source:FlyBase;Acc:FBgn0003116]
FBgn0003117	0.00833202	0.00827421	0	0	0	0	0	0	0.0280739	0	pnr	pannier [Source:FlyBase;Acc:FBgn0003117]
FBgn0003134	13.4475	12.8587	23.1919	22.5072	21.6217	17.2159	12.145	38.8022	16.7042	15.4086	Pp1alpha-96A	Protein phosphatase 1alpha at 96A [Source:FlyBase;Acc:FBgn0003134]
FBgn0003137	0.809316	0.0861108	0	0	0	0.179526	0	0	0.0292169	0	Ppn	Papilin [Source:FlyBase;Acc:FBgn0003137]
FBgn0003139	11.3917	9.66714	23.6681	14.5818	5.84185	12.6569	15.0681	6.1165	18.0616	5.76929	PpV	Protein phosphatase V [Source:FlyBase;Acc:FBgn0003139]
FBgn0003141	20.5384	12.9522	3.69336	4.14268	0.21214	5.92544	11.2822	0	6.31407	1.7459	pr	purple [Source:FlyBase;Acc:FBgn0003141]
FBgn0003159	0	0	0	0.0273742	0	0.205599	0.135508	0.0468794	0	0.0571171	ptr	proximal to raf [Source:FlyBase;Acc:FBgn0003159]
FBgn0003162	0	0	0.0356729	0.557555	0	1.09831	0.807464	0	0.277281	0.209102	Pu	Punch [Source:FlyBase;Acc:FBgn0003162]
FBgn0003165	17.431	16.3632	51.6768	34.0171	18.7447	17.0706	19.2381	62.282	20.5842	16.3198	pum	pumilio [Source:FlyBase;Acc:FBgn0003165]
FBgn0003169	20.5228	11.1245	15.636	10.6402	10.7395	19.5348	8.53369	7.84361	6.35836	6.67768	put	punt [Source:FlyBase;Acc:FBgn0003169]
FBgn0003174	0.787822	0.302233	0	0.379713	0.994046	0.568407	0.156247	0	0.20646	0.297092	pwn	pawn [Source:FlyBase;Acc:FBgn0003174]
FBgn0003175	5.02011	3.92069	9.78239	9.29732	3.16872	2.37028	3.02438	3.00633	2.55297	4.23305	px	plexus [Source:FlyBase;Acc:FBgn0003175]
FBgn0003189	0	0	0.0370403	0.197684	0.672727	0.122814	0.0599591	0	0	0	r	rudimentary [Source:FlyBase;Acc:FBgn0003189]
FBgn0003204	1.60639	1.54805	0.962005	5.80913	0.121055	2.14684	2.26195	2.85952	5.84494	7.34983	ras	raspberry [Source:FlyBase;Acc:FBgn0003204]
FBgn0003205	10.3243	11.3174	15.1652	16.8154	6.03476	8.63894	9.74043	27.9061	22.4267	13.0478	Ras85D	Ras oncogene at 85D [Source:FlyBase;Acc:FBgn0003205]
FBgn0003206	0.600683	0.0596516	0	1.8529	0.892505	0.678346	1.33299	0	0	6.38589	Ras64B	Ras oncogene at 64B [Source:FlyBase;Acc:FBgn0003206]
FBgn0003209	3.36095	2.79398	6.92766	3.98131	0.542259	5.99497	3.43144	12.7516	4.17951	4.08901	raw	raw [Source:FlyBase;Acc:FBgn0003209]
FBgn0003210	1.46913	1.24089	4.03313	0.248452	0.957513	2.03771	2.75508	5.14334	2.0647	3.67446	rb	ruby [Source:FlyBase;Acc:FBgn0003210]
FBgn0003218	4.18419	4.24607	10.0186	6.69087	3.5471	2.50561	1.96216	2.66889	0.608175	1.82033	rdgB	retinal degeneration B [Source:FlyBase;Acc:FBgn0003218]
FBgn0003227	0	2.44704	0.84006	0	1.53915	0	0	0.265916	0	0	rec	recombination-defective [Source:FlyBase;Acc:FBgn0003227]
FBgn0003231	6.93636	13.6927	7.75402	12.4479	8.68036	7.66523	5.41505	11.4485	3.92755	8.97696	ref(2)P	refractory to sigma P [Source:FlyBase;Acc:FBgn0003231]
FBgn0003250	0	0	0	0	0	0	0.25282	0	0	0.0186834	Rh4	Rhodopsin 4 [Source:FlyBase;Acc:FBgn0003250]
FBgn0003254	0	0	0	0	0	0.01568	0.0321518	0	0	0	rib	ribbon [Source:FlyBase;Acc:FBgn0003254]
FBgn0003255	0.0160315	0.0437807	0.0191107	0.0154536	0.0425354	0.113151	0.301621	0.100476	0	0.0480088	rk	rickets [Source:FlyBase;Acc:FBgn0003255]
FBgn0003256	30.1789	31.542	23.6321	21.6711	17.815	31.6867	25.4191	55.4378	17.9012	11.016	rl	rolled [Source:FlyBase;Acc:FBgn0003256]
FBgn0003257	0.322248	0.111174	1.7374	0.427483	0.116467	0.451313	0.366744	0.178691	0.4263	0.264081	r-l	rudimentary-like [Source:FlyBase;Acc:FBgn0003257]
FBgn0003261	17.4009	17.8879	23.439	30.9856	11.0445	28.2213	22.7003	37.9829	29.8577	14.0617	Rm62	Rm62 [Source:FlyBase;Acc:FBgn0003261]
FBgn0003268	0	0.0525087	0	0	0	0	0.00956554	0	0	0	rod	rough deal [Source:FlyBase;Acc:FBgn0003268]
FBgn0003274	675.474	671.652	331.434	242.74	277.593	659.032	659.387	246.876	489.698	380.121	RpLP2	Ribosomal protein LP2 [Source:FlyBase;Acc:FBgn0003274]
FBgn0003275	67.4764	75.8307	54.6333	51.3829	34.2723	55.1399	69.5255	179.589	94.4343	66.7932	RpII18	RNA polymerase II 18kD subunit [Source:FlyBase;Acc:FBgn0003275]
FBgn0003277	2.49143	2.1306	4.58549	5.71496	2.09511	2.25801	3.03463	4.2329	2.11202	2.40779	RpII215	RNA polymerase II 215kD subunit [Source:FlyBase;Acc:FBgn0003277]
FBgn0003278	0.0745282	0.15419	0	0.443025	0	0.84164	0.347553	0	0	0	RpI135	RNA polymerase I 135kD subunit [Source:FlyBase;Acc:FBgn0003278]
FBgn0003279	42.2859	46.7886	68.2768	67.6258	49.0543	61.2568	48.151	56.5022	66.8995	41.3892	RpL4	Ribosomal protein L4 [Source:FlyBase;Acc:FBgn0003279]
FBgn0003285	34.0973	42.8914	86.9627	60.803	46.6755	55.9376	42.3896	100.517	27.9896	31.1942	rst	roughest [Source:FlyBase;Acc:FBgn0003285]
FBgn0003292	0	0	0.016259	0.0262952	0.144753	0	0	0	0.448071	0	rt	rotated abdomen [Source:FlyBase;Acc:FBgn0003292]
FBgn0003301	1.09781	1.23265	0.368249	0.870758	1.25207	1.05787	2.24466	6.64898	2.76676	2.13951	rut	rutabaga [Source:FlyBase;Acc:FBgn0003301]
FBgn0003302	1.75819	2.77066	1.55974	0.881305	2.32799	6.73607	3.68201	0.578852	1.68564	9.29631	rux	roughex [Source:FlyBase;Acc:FBgn0003302]
FBgn0003308	0.609393	0.380104	2.84574	0.776764	0.716233	1.86264	0.690007	2.32315	0.543018	1.56853	ry	rosy [Source:FlyBase;Acc:FBgn0003308]
FBgn0003310	3.92081	2.8006	3.69358	6.12565	3.60574	0.99671	1.81132	1.68808	1.54639	2.21397	S	Star [Source:FlyBase;Acc:FBgn0003310]
FBgn0003317	1.85353	4.94891	6.96301	7.97151	3.53259	11.0944	4.14894	0	9.75224	5.9568	sax	saxophone [Source:FlyBase;Acc:FBgn0003317]
FBgn0003319	0	0	0	0	0	0.121011	0.00710398	1.72437	0	0	Sb	Stubble [Source:FlyBase;Acc:FBgn0003319]
FBgn0003321	3.29442	1.09277	4.69644	3.39175	2.725	4.08472	2.21517	0.817382	0.0114435	2.75289	sbr	small bristles [Source:FlyBase;Acc:FBgn0003321]
FBgn0003326	0.00783724	0	0	0	0	0.409683	0.196603	0	0	0	sca	scabrous [Source:FlyBase;Acc:FBgn0003326]
FBgn0003328	0	0.0453786	0	0	0	0.0716717	0	0	0	0	scb	scab [Source:FlyBase;Acc:FBgn0003328]
FBgn0003330	3.88521	4.82282	6.98516	1.78049	6.45543	3.59633	1.8282	2.39509	0.107302	1.62125	Sce	Sex combs extra [Source:FlyBase;Acc:FBgn0003330]
FBgn0003334	0.190535	2.92231	2.16336	5.29377	2.01344	2.10369	2.56049	0	2.95957	2.46528	Scm	Sex comb on midleg [Source:FlyBase;Acc:FBgn0003334]
FBgn0003339	0	0	0	0.0106187	0	0	0	0	0.00927911	0	Scr	Sex combs reduced [Source:FlyBase;Acc:FBgn0003339]
FBgn0003345	6.98905	7.98232	6.36611	7.88359	6.16495	7.41251	7.2116	17.9507	11.8043	7.57968	sd	scalloped [Source:FlyBase;Acc:FBgn0003345]
FBgn0003346	1.65142	0.0581171	0.753451	1.86419	0	1.18961	0.688875	0	0.274001	0.794497	RanGAP	Ran GTPase activating protein [Source:FlyBase;Acc:FBgn0003346]
FBgn0003353	1.4182	5.30524	1.60935	4.10213	0.217285	4.03666	1.26475	0	0	2.49284	sei	seizure [Source:FlyBase;Acc:FBgn0003353]
FBgn0003360	95.7966	88.4689	101.198	88.3095	44.305	75.86	66.8869	100.954	65.3348	50.3463	sesB	stress-sensitive B [Source:FlyBase;Acc:FBgn0003360]
FBgn0003366	0	0	0	0.00501043	0	0	0	0.0390919	0	0.0129713	sev	sevenless [Source:FlyBase;Acc:FBgn0003366]
FBgn0003371	21.8779	14.5461	38.1711	41.7462	15.4182	22.4631	19.4846	55.6909	24.2051	15.8723	sgg	shaggy [Source:FlyBase;Acc:FBgn0003371]
FBgn0003373	0	0	0	0	0	0	0.0230982	0.240066	0	0	Sgs3	Salivary gland secretion 3 [Source:FlyBase;Acc:FBgn0003373]
FBgn0003377	0	14.4487	42.1704	17.6003	16.3498	28.9955	36.3337	17.1649	0	0	Sgs7	Salivary gland secretion 7 [Source:FlyBase;Acc:FBgn0003377]
FBgn0003378	2.43316	3.90322	0	0	0	0.528413	3.25052	0	0	0	Sgs8	Salivary gland secretion 8 [Source:FlyBase;Acc:FBgn0003378]
FBgn0003380	38.0821	22.8634	88.7534	51.5924	42.1378	63.4938	75.1612	336.14	70.6217	47.6923	Sh	Shaker [Source:FlyBase;Acc:FBgn0003380]
FBgn0003386	5.8863	5.35819	28.5629	13.5222	7.51275	13.3967	9.11663	26.1602	7.12699	6.94202	Shaw	Shaker cognate w [Source:FlyBase;Acc:FBgn0003386]
FBgn0003390	0.266172	0.0275546	0.661535	0	0	0	0	0	0	0	shf	shifted [Source:FlyBase;Acc:FBgn0003390]
FBgn0003391	0.123845	0.189465	0.0798015	0.72274	0.0781515	0.103948	0.106572	0	0.0845845	0.136989	shg	shotgun [Source:FlyBase;Acc:FBgn0003391]
FBgn0003392	21.6563	25.3021	48.346	41.9459	33.3783	25.8399	20.0482	44.5619	33.3633	21.4104	shi	shibire [Source:FlyBase;Acc:FBgn0003392]
FBgn0003396	1.34806	1.03108	1.05435	0.23477	0.442489	0.603152	2.06421	3.23494	1.14939	1.35633	shn	schnurri [Source:FlyBase;Acc:FBgn0003396]
FBgn0003410	10.7561	9.17344	17.9192	17.9026	7.45816	10.6749	8.17848	27.8598	5.12852	10.1781	sina	seven in absentia [Source:FlyBase;Acc:FBgn0003410]
FBgn0003415	8.14222	5.92541	16.5734	11.6692	5.0042	9.46923	8.16618	20.0356	11.6268	6.39121	skd	skuld [Source:FlyBase;Acc:FBgn0003415]
FBgn0003416	0	0	0	1.49149	0	0.256957	0.874489	0	0.0127778	0.484551	sl	small wing [Source:FlyBase;Acc:FBgn0003416]
FBgn0003423	16.246	16.2381	43.7381	40.2549	11.2252	28.9205	14.6616	14.944	24.8166	28.5986	slgA	sluggish A [Source:FlyBase;Acc:FBgn0003423]
FBgn0003429	39.9686	24.7842	84.0309	53.8359	29.056	40.4982	27.8937	124.41	30.2642	23.2483	slo	slowpoke [Source:FlyBase;Acc:FBgn0003429]
FBgn0003430	50.0004	45.9156	70.7071	63.2517	56.447	0.0988533	0.523637	0.263338	0	0.034952	slp1	sloppy paired 1 [Source:FlyBase;Acc:FBgn0003430]
FBgn0003435	48.7787	27.6127	113.542	73.895	42.8664	24.3904	16.2416	57.7262	18.5361	14.2511	sm	smooth [Source:FlyBase;Acc:FBgn0003435]
FBgn0003444	0	0.116263	0.510617	0	0	0	0.223716	0	0.125552	0.978377	smo	smoothened [Source:FlyBase;Acc:FBgn0003444]
FBgn0003447	11.7293	10.4127	18.8719	12.3501	11.9076	7.57065	10.6277	31.2791	9.48254	8.23864	sn	singed [Source:FlyBase;Acc:FBgn0003447]
FBgn0003449	16.2318	17.5497	13.7374	14.563	8.65069	20.5325	16.9492	0	7.6355	9.6446	snf	sans fille [Source:FlyBase;Acc:FBgn0003449]
FBgn0003459	0.501274	0.569643	1.90972	1.31512	1.11314	2.30519	0.518505	3.37674	0.121886	0.510699	stwl	stonewall [Source:FlyBase;Acc:FBgn0003459]
FBgn0003460	0.681682	0	0	0	0	0	0.172258	0	0	0	so	sine oculis [Source:FlyBase;Acc:FBgn0003460]
FBgn0003462	234.909	292.212	73.6289	68.7679	52.513	134.431	364.73	178.42	176.281	227.098	Sod	Superoxide dismutase [Source:FlyBase;Acc:FBgn0003462]
FBgn0003463	0.0036983	0	0	0	0	0.0135999	0.0278864	0	0	0	sog	short gastrulation [Source:FlyBase;Acc:FBgn0003463]
FBgn0003464	2.71833	3.30338	2.56898	5.16469	2.24912	3.19992	3.78913	1.58947	5.21633	1.76973	sol	small optic lobes [Source:FlyBase;Acc:FBgn0003464]
FBgn0003475	9.98901	13.235	22.8152	33.0446	11.7076	19.9189	4.62946	39.9869	14.7911	10.9581	spir	spire [Source:FlyBase;Acc:FBgn0003475]
FBgn0003480	0	0	0	2.9629	0	0	0.975133	2.54661	0	0	spn-B	spindle B [Source:FlyBase;Acc:FBgn0003480]
FBgn0003483	0.525286	1.06636	0.587391	0	0.0789359	0.879301	0.0179403	0	0	1.7401	spn-E	spindle E [Source:FlyBase;Acc:FBgn0003483]
FBgn0003486	0	0.0739469	0.400404	0.0422897	0	0.918339	0.220046	0	0	0	spo	spook [Source:FlyBase;Acc:FBgn0003486]
FBgn0003495	1.09319	1.53885	1.76865	3.53771	0.048315	5.17502	3.96455	11.2673	0.0212402	0.714748	spz	spatzle [Source:FlyBase;Acc:FBgn0003495]
FBgn0003499	0.0165747	0	0.171215	0.24495	0.703567	0.0779793	0.101795	0.0240402	0	0.00957391	sr	stripe [Source:FlyBase;Acc:FBgn0003499]
FBgn0003502	11.5643	6.53924	24.0308	18.6121	11.2049	13.3015	13.386	31.4209	16.1553	13.2812	Btk29A	Btk family kinase at 29A [Source:FlyBase;Acc:FBgn0003502]
FBgn0003507	0.00989084	0.0270355	0.0324535	0	0	0	0	0	0.00858145	0	srp	serpent [Source:FlyBase;Acc:FBgn0003507]
FBgn0003510	0	0	0.397333	0.0389143	0.027211	0.579086	0.0146062	0	1.07987	0.0755579	Sry-alpha	Serendipity alpha [Source:FlyBase;Acc:FBgn0003510]
FBgn0003511	1.71061	3.29637	0	1.96338	3.19868	3.62208	3.07018	15.6221	1.7497	1.75398	Sry-beta	Serendipity beta [Source:FlyBase;Acc:FBgn0003511]
FBgn0003512	7.19087	3.37344	0	1.62198	1.44883	5.01934	1.60815	0.0795902	2.64753	0.554597	Sry-delta	Serendipity delta [Source:FlyBase;Acc:FBgn0003512]
FBgn0003514	48.8809	60.9674	48.5792	50.9091	46.0128	72.451	50.5453	72.7262	53.8406	42.3764	sqh	spaghetti squash [Source:FlyBase;Acc:FBgn0003514]
FBgn0003515	2.09466	0.247891	3.20857	1.23451	0	1.3482	1.13092	0	0	0.682531	st	scarlet [Source:FlyBase;Acc:FBgn0003515]
FBgn0003517	111.763	82.0164	73.7177	79.9408	67.3861	107.71	94.6104	84.0538	83.6684	69.3197	sta	stubarista [Source:FlyBase;Acc:FBgn0003517]
FBgn0003520	13.8125	12.5104	27.9683	18.5003	9.77902	16.0529	13.4151	23.7933	16.5953	15.3562	stau	staufen [Source:FlyBase;Acc:FBgn0003520]
FBgn0003525	0	0.0262123	0	0	0.242783	0	0.0848908	0	2.69775	0	stg	string [Source:FlyBase;Acc:FBgn0003525]
FBgn0003557	1.90086	2.25167	6.22767	1.42581	2.69874	1.6704	1.47049	1.1312	0.413552	0.0628302	Su(dx)	Suppressor of deltex [Source:FlyBase;Acc:FBgn0003557]
FBgn0003559	3.15659	4.32149	2.70867	3.18737	0.976892	2.54397	1.51912	0.384067	8.40712	4.06215	su(f)	suppressor of forked [Source:FlyBase;Acc:FBgn0003559]
FBgn0003567	0.779502	0.156177	0.14672	0.764587	0.420899	1.11966	0.593756	0	0	0.170639	su(Hw)	suppressor of Hairy wing [Source:FlyBase;Acc:FBgn0003567]
FBgn0003575	1.59214	1.25346	3.60497	3.12286	1.9828	2.37041	1.62795	7.65197	5.19081	1.61892	su(s)	suppressor of sable [Source:FlyBase;Acc:FBgn0003575]
FBgn0003598	0.890963	0.214023	0.501524	0.566415	0	0.544702	0.556621	1.17069	0.138532	0.889432	Su(var)3-7	Suppressor of variegation 3-7 [Source:FlyBase;Acc:FBgn0003598]
FBgn0003607	41.1823	64.236	23.653	50.0041	24.1149	33.5949	40.505	36.6788	65.8631	33.246	Su(var)205	Suppressor of variegation 205 [Source:FlyBase;Acc:FBgn0003607]
FBgn0003612	7.30588	8.41587	18.0303	10.1939	4.26868	10.0424	7.62693	13.0645	7.95135	4.48613	Su(var)2-10	Suppressor of variegation 2-10 [Source:FlyBase;Acc:FBgn0003612]
FBgn0003638	6.05335	3.14628	10.3153	7.96779	1.90553	3.01906	4.67882	11.4992	4.37575	2.91796	su(w[a])	suppressor of white-apricot [Source:FlyBase;Acc:FBgn0003638]
FBgn0003651	0.0843788	0.633527	2.09918	0.392846	0.449153	0	0.37807	0	0	0	svp	seven up [Source:FlyBase;Acc:FBgn0003651]
FBgn0003654	4.3964	5.39023	8.78064	8.39943	3.73312	6.06897	6.27771	3.26864	2.42698	3.27979	sw	short wing [Source:FlyBase;Acc:FBgn0003654]
FBgn0003655	0	0	0	0.447745	0	0	0.0112039	0	0	0	swa	swallow [Source:FlyBase;Acc:FBgn0003655]
FBgn0003656	5.18696	4.49943	9.2968	6.07564	1.74081	6.1297	6.37189	14.6328	5.5834	2.56381	sws	swiss cheese [Source:FlyBase;Acc:FBgn0003656]
FBgn0003660	4.61741	0.144747	0.110305	2.53986	3.63529	1.54316	0.338736	0	0	0.436498	Syb	Synaptobrevin [Source:FlyBase;Acc:FBgn0003660]
FBgn0003676	4.60677	6.68528	10.2471	9.28622	3.38177	5.71843	7.67408	13.19	2.33064	5.6465	T-cp1	Tcp1-like [Source:FlyBase;Acc:FBgn0003676]
FBgn0003687	1.46543	1.50916	1.1646	2.40667	0	1.83878	1.30917	0.453552	0	3.7925	Tbp	TATA binding protein [Source:FlyBase;Acc:FBgn0003687]
FBgn0003701	0	0	0	0	0.0319062	0	0.0488813	0	0	0.215071	thr	three rows [Source:FlyBase;Acc:FBgn0003701]
FBgn0003710	2.94575	4.43288	5.46637	8.9154	2.26944	5.45169	4.38708	19.6386	5.16919	3.9944	tipE	temperature-induced paralytic E [Source:FlyBase;Acc:FBgn0003710]
FBgn0003714	30.1864	17.3436	50.6273	13.3268	27.3394	34.1173	19.1582	34.1602	10.3098	17.0975	tko	technical knockout [Source:FlyBase;Acc:FBgn0003714]
FBgn0003716	0.118917	1.95278	0.037802	4.95202	0	1.34364	0.443642	0	0.841422	0.261151	tkv	thickveins [Source:FlyBase;Acc:FBgn0003716]
FBgn0003719	0.231702	0.203798	1.79929	0.382887	0.154569	2.50445	0.740924	6.47253	0.200751	0.469188	tld	tolloid [Source:FlyBase;Acc:FBgn0003719]
FBgn0003721	53.859	54.9256	63.1212	62.8731	41.5712	63.0308	55.5105	104.176	84.2734	58.7698	Tm1	Tropomyosin 1 [Source:FlyBase;Acc:FBgn0003721]
FBgn0003731	0	0	0.162148	0	0	0.0106672	0	0	0	0	Egfr	Epidermal growth factor receptor [Source:FlyBase;Acc:FBgn0003731]
FBgn0003732	2.14007	0.569184	2.00551	1.83637	1.19033	1.28056	1.75848	3.14255	0.333157	1.6341	Top2	Topoisomerase 2 [Source:FlyBase;Acc:FBgn0003732]
FBgn0003733	0.00718114	0	0.171208	0	0	0.0202737	0	0	0	0	tor	torso [Source:FlyBase;Acc:FBgn0003733]
FBgn0003741	9.12632	8.51472	4.5022	2.73714	0.399095	5.94202	6.5573	3.05077	5.97462	0.682292	tra	transformer [Source:FlyBase;Acc:FBgn0003741]
FBgn0003742	6.79271	7.32274	8.07235	15.7717	2.41047	6.98324	3.71317	0	1.8069	2.09926	tra2	transformer 2 [Source:FlyBase;Acc:FBgn0003742]
FBgn0003744	0.673715	4.58771	1.74009	6.24691	0.732657	4.12887	1.88817	20.8668	2.33758	1.48914	trc	tricornered [Source:FlyBase;Acc:FBgn0003744]
FBgn0003748	3.37861	0.248508	0.834034	3.00008	4.23401	3.1734	1.48092	0	2.64488	0.244547	Treh	Trehalase [Source:FlyBase;Acc:FBgn0003748]
FBgn0003751	0.552928	2.77776	0	3.3234	0	0.275478	0.721773	0	4.65758	1.00648	trk	trunk [Source:FlyBase;Acc:FBgn0003751]
FBgn0003862	3.41103	3.16605	9.25889	6.63947	2.62754	3.14841	3.70315	10.9816	3.3539	3.18668	trx	trithorax [Source:FlyBase;Acc:FBgn0003862]
FBgn0003866	0	0	0	0	0	0.0129658	0	0	0	0.0641813	tsh	teashirt [Source:FlyBase;Acc:FBgn0003866]
FBgn0003867	0	0.0181577	0	0.0489428	0	0.36135	1.12906	7.70077	0	0	tsl	torso-like [Source:FlyBase;Acc:FBgn0003867]
FBgn0003870	0.0154271	0	0	0	0	0	0.200435	0.278244	2.2178	0.179662	ttk	tramtrack [Source:FlyBase;Acc:FBgn0003870]
FBgn0003882	0.562461	1.54767	0.391123	1.33288	1.01977	1.05864	0.3844	0.64628	0.65146	1.15801	tub	tube [Source:FlyBase;Acc:FBgn0003882]
FBgn0003884	169.453	173.678	227.151	232.148	112.934	263.583	250.977	310.387	266.077	214.364	alphaTub84B	alpha-Tubulin at 84B [Source:FlyBase;Acc:FBgn0003884]
FBgn0003885	12.9235	16.0583	7.53394	18.9747	8.37841	14.1151	13.7177	22.4106	15.7544	11.5171	alphaTub84D	alpha-Tubulin at 84D [Source:FlyBase;Acc:FBgn0003885]
FBgn0003886	0	0	0	0.0303289	0	0	0.0151521	0	0	0	alphaTub85E	alpha-Tubulin at 85E [Source:FlyBase;Acc:FBgn0003886]
FBgn0003887	155.632	156.31	209.353	160.715	82.9567	231.547	221.798	256.014	229.021	175.369	betaTub56D	beta-Tubulin at 56D [Source:FlyBase;Acc:FBgn0003887]
FBgn0003888	0.0181756	0.261674	0	0	0.0192809	0.205247	0.385703	4.87401	0.0153054	0.0181438	betaTub60D	beta-Tubulin at 60D [Source:FlyBase;Acc:FBgn0003888]
FBgn0003889	0.116411	1.66996	0.70926	0.149595	1.97642	1.78933	0.274524	23.0838	1.41631	0.012917	betaTub85D	beta-Tubulin at 85D [Source:FlyBase;Acc:FBgn0003889]
FBgn0003890	0.056982	0.0283304	0.0339978	0.0275332	0.0906524	0.0402052	0.426017	0	0	0.0142658	betaTub97EF	beta-Tubulin at 97EF [Source:FlyBase;Acc:FBgn0003890]
FBgn0003891	4.81469	4.51172	7.92907	11.2726	4.02143	5.27416	4.92339	8.01826	6.81247	3.94549	tud	tudor [Source:FlyBase;Acc:FBgn0003891]
FBgn0003892	0.56626	0.457621	1.51764	0.971235	0.737743	0.374863	0.36172	2.38882	0.453962	0.191016	ptc	patched [Source:FlyBase;Acc:FBgn0003892]
FBgn0003896	0	0	0	0	0	0	0.0491451	0	0	0.301225	tup	tailup [Source:FlyBase;Acc:FBgn0003896]
FBgn0003900	0.0126	0	0	0	0.0267447	0	0	0	0	0	twi	twist [Source:FlyBase;Acc:FBgn0003900]
FBgn0003941	637.193	783.568	559.302	522.839	491.503	552.107	471.514	609.527	396.646	399.514	RpL40	Ribosomal protein L40 [Source:FlyBase;Acc:FBgn0003941]
FBgn0003942	463.722	546.651	198.306	246.449	300.045	404.48	385.902	244.679	313.069	267.436	RpS27A	Ribosomal protein S27A [Source:FlyBase;Acc:FBgn0003942]
FBgn0003943	33.9613	16.3497	20.9636	31.3095	11.5181	23.7349	25.393	36.4975	25.7212	30.1774	Ubi-p63E	Ubiquitin-63E [Source:FlyBase;Acc:FBgn0003943]
FBgn0003944	0.024365	0	0	0	0	0	0.0235082	0	0	0	Ubx	Ultrabithorax [Source:FlyBase;Acc:FBgn0003944]
FBgn0003950	0	0	0.186772	0	0	0	0.00944801	0	0	0	unc	uncoordinated [Source:FlyBase;Acc:FBgn0003950]
FBgn0003963	7.92804	2.48963	10.3694	7.6166	1.53534	0	0.611624	2.33525	1.1532	0.37058	ush	u-shaped [Source:FlyBase;Acc:FBgn0003963]
FBgn0003964	2.61671	3.35647	5.06888	8.93347	4.2428	1.92384	2.34061	0.273332	6.62787	4.53481	usp	ultraspiracle [Source:FlyBase;Acc:FBgn0003964]
FBgn0003965	0.818858	0.309782	0	0	0	0	0	0	0	0	v	vermilion [Source:FlyBase;Acc:FBgn0003965]
FBgn0003969	4.45386	2.61899	6.86935	6.99545	2.55305	4.88762	3.11732	4.54196	4.15444	2.39126	vap	vacuolar peduncle [Source:FlyBase;Acc:FBgn0003969]
FBgn0003977	0.311502	0.382126	0	0.307219	0	0.134502	0.282329	0	0.717979	0.41358	vir	virilizer [Source:FlyBase;Acc:FBgn0003977]
FBgn0003978	0.817574	1.61851	0	0.668637	1.64734	4.43653	2.29358	5.05927	3.79217	3.5306	vls	valois [Source:FlyBase;Acc:FBgn0003978]
FBgn0003996	0.646142	0.729158	0.910295	1.37782	1.97412	11.3875	9.4741	28.1265	13.6729	11.1212	w	white [Source:FlyBase;Acc:FBgn0003996]
FBgn0003997	8.98592	7.50232	17.0479	8.71995	8.2903	17.6583	19.1002	75.3193	29.8906	22.8692	hid	head involution defective [Source:FlyBase;Acc:FBgn0003997]
FBgn0004034	0	0.434283	0	0.776547	0	5.62088	4.28601	0	0.542867	4.79043	y	yellow [Source:FlyBase;Acc:FBgn0004034]
FBgn0004049	4.51997	2.32467	6.66973	6.00981	2.44146	4.01773	3.78846	15.0988	1.2172	2.44059	yrt	yurt [Source:FlyBase;Acc:FBgn0004049]
FBgn0004050	1.81802	3.23272	10.5751	5.11986	1.01019	4.99834	2.45206	0.954494	3.91272	2.77444	z	zeste [Source:FlyBase;Acc:FBgn0004050]
FBgn0004055	45.4173	35.3042	70.791	61.762	31.0288	58.0732	41.0478	79.6361	59.6574	47.722	uzip	unzipped [Source:FlyBase;Acc:FBgn0004055]
FBgn0004066	1.31037	12.1747	5.71875	3.21138	8.62704	5.14165	7.3072	1.67036	0.898001	10.3535	Prosalpha4	Proteasome alpha4 subunit [Source:FlyBase;Acc:FBgn0004066]
FBgn0004087	3.27273	0	0.283734	0	0	0	0	0.895045	0	0	Dhfr	Dihydrofolate reductase [Source:FlyBase;Acc:FBgn0004087]
FBgn0004101	0.542899	0.70502	1.66773	3.09554	0.132964	0.659019	0.790748	0	3.85197	0.0208483	bs	blistered [Source:FlyBase;Acc:FBgn0004101]
FBgn0004102	0.0049184	0	0	0	0	0	0	0	0	0.00981928	oc	ocelliless [Source:FlyBase;Acc:FBgn0004102]
FBgn0004103	33.7064	23.7625	49.8144	36.0971	24.646	32.4838	25.5778	43.6899	28.1175	19.9943	Pp1-87B	Protein phosphatase 1 at 87B [Source:FlyBase;Acc:FBgn0004103]
FBgn0004106	0.543752	0	0	0	0	0	0	0	0.957697	0.222048	Cdk1	Cyclin-dependent kinase 1 [Source:FlyBase;Acc:FBgn0004106]
FBgn0004107	5.63813	1.37681	2.64231	1.9723	0.196188	1.50429	1.71053	5.32942	0	1.66075	Cdk2	Cyclin-dependent kinase 2 [Source:FlyBase;Acc:FBgn0004107]
FBgn0004108	67.888	66.466	144.21	142.656	59.276	41.5856	39.4271	39.1754	50.0359	28.1872	Nrt	Neurotactin [Source:FlyBase;Acc:FBgn0004108]
FBgn0004118	9.27703	12.0433	4.84677	8.24047	11.6799	8.74838	9.36313	2.10894	8.35318	7.9091	nAChRbeta2	nicotinic Acetylcholine Receptor beta2 [Source:FlyBase;Acc:FBgn0004118]
FBgn0004132	9.50235	6.6055	3.12855	4.88525	0.288138	4.08797	12.1806	13.6126	6.32721	4.69755	boca	boca [Source:FlyBase;Acc:FBgn0004132]
FBgn0004133	0.14009	0.224645	0	1.14747	0.324351	0.9932	0.0574457	0	0.583523	0.0305073	blow	blown fuse [Source:FlyBase;Acc:FBgn0004133]
FBgn0004167	0.0685428	0.0156953	0	0.0124341	0	0	0.0217795	0.11318	0.0407455	0	kst	karst [Source:FlyBase;Acc:FBgn0004167]
FBgn0004168	0	0	0.216102	0.116498	0	0.0121857	0.137427	0	0	0	5-HT1A	5-hydroxytryptamine (serotonin) receptor 1A [Source:FlyBase;Acc:FBgn0004168]
FBgn0004169	0	0	0.12651	0	0	0.0842402	0	0	0	0	up	upheld [Source:FlyBase;Acc:FBgn0004169]
FBgn0004177	45.6775	44.5317	55.0949	72.0967	50.2665	45.327	37.2498	62.528	48.1955	34.2094	mts	microtubule star [Source:FlyBase;Acc:FBgn0004177]
FBgn0004179	16.704	18.356	27.7613	18.0698	19.9904	15.4864	11.5449	37.1377	12.628	7.75798	Csp	Cysteine string protein [Source:FlyBase;Acc:FBgn0004179]
FBgn0004198	0.14507	0	0.245695	0.00368001	0	0.159733	0.189111	0	0.221272	0.104887	ct	cut [Source:FlyBase;Acc:FBgn0004198]
FBgn0004227	6.51116	8.34449	15.4473	10.969	6.07181	6.91864	8.64052	30.7388	10.5055	7.98735	nonA	no on or off transient A [Source:FlyBase;Acc:FBgn0004227]
FBgn0004237	1.43119	4.89003	12.252	8.32139	9.65635	4.89149	5.66849	11.6335	12.1023	7.35292	Hrb87F	Heterogeneous nuclear ribonucleoprotein at 87F [Source:FlyBase;Acc:FBgn0004237]
FBgn0004242	46.7063	38.8208	139.217	84.7995	44.2141	56.624	34.0919	126.458	37.2929	23.8962	Syt1	Synaptotagmin 1 [Source:FlyBase;Acc:FBgn0004242]
FBgn0004244	0.345829	0.0490617	2.50147	2.593	0	5.64239	5.75358	18.9686	2.70919	4.26369	Rdl	Resistant to dieldrin [Source:FlyBase;Acc:FBgn0004244]
FBgn0004359	0.422251	0.866604	2.66208	1.38949	0.746702	0	0	0	0	0.220849	T48	Transcript 48 [Source:FlyBase;Acc:FBgn0004359]
FBgn0004360	0.435369	0	0	0	0	0	0.37913	0	0	0	Wnt2	Wnt oncogene analog 2 [Source:FlyBase;Acc:FBgn0004360]
FBgn0004362	77.4565	143.204	94.0923	80.5462	47.1736	64.1974	99.4052	78.7872	44.2987	90.7941	HmgD	High mobility group protein D [Source:FlyBase;Acc:FBgn0004362]
FBgn0004363	147.866	137.867	134.836	87.8868	79.5714	122.09	107.671	111.383	142.985	110.07	porin	porin [Source:FlyBase;Acc:FBgn0004363]
FBgn0004364	0.103479	0.0316189	0.455466	0.0613843	0	18.0681	8.10245	28.995	12.8737	11.8909	18w	18 wheeler [Source:FlyBase;Acc:FBgn0004364]
FBgn0004367	0.188391	0	0	0	0	0	0.142816	0	0	0.016119	mei-41	meiotic 41 [Source:FlyBase;Acc:FBgn0004367]
FBgn0004368	1.04321	1.18727	4.11536	0.654312	0.108605	0.887126	0.353457	4.40068	1.46263	0.795895	Ptp4E	Protein tyrosine phosphatase 4E [Source:FlyBase;Acc:FBgn0004368]
FBgn0004369	24.2554	26.043	83.0995	41.3124	21.9252	34.5393	38.4015	92.0219	41.0324	26.3928	Ptp99A	Protein tyrosine phosphatase 99A [Source:FlyBase;Acc:FBgn0004369]
FBgn0004370	0.940426	0.846364	3.07941	2.60993	2.25552	3.02198	5.31967	8.73004	4.46427	2.81039	Ptp10D	Protein tyrosine phosphatase 10D [Source:FlyBase;Acc:FBgn0004370]
FBgn0004372	0.701571	0.14738	2.28381	0	0.429563	1.90451	0.364485	1.75881	1.34104	0	aly	always early [Source:FlyBase;Acc:FBgn0004372]
FBgn0004373	2.73061	5.01118	7.33525	6.19673	2.70686	5.91548	3.95547	19.9189	5.12444	3.85675	fwd	four wheel drive [Source:FlyBase;Acc:FBgn0004373]
FBgn0004378	0	0	0	0	0	0.0641919	0.0548438	0	0	0.453932	Klp61F	Kinesin-like protein at 61F [Source:FlyBase;Acc:FBgn0004378]
FBgn0004379	0	0	0	0	0	0.0211751	0.27499	0	0	0	Klp67A	Kinesin-like protein at 67A [Source:FlyBase;Acc:FBgn0004379]
FBgn0004380	4.79493	4.59129	9.27896	5.32717	0.920019	5.43017	4.15585	17.2953	6.10035	6.80552	Klp64D	Kinesin-like protein at 64D [Source:FlyBase;Acc:FBgn0004380]
FBgn0004381	4.20905	4.68701	1.35705	5.54456	5.98841	7.18917	5.78814	4.7784	8.35913	4.56791	Klp68D	Kinesin-like protein at 68D [Source:FlyBase;Acc:FBgn0004381]
FBgn0004387	1.3212	0.432061	4.54887	2.57025	0.330425	1.30721	1.15151	2.2615	2.89829	1.07182	Klp98A	Kinesin-like protein at 98A [Source:FlyBase;Acc:FBgn0004387]
FBgn0004390	2.55715	4.11278	3.37022	2.1052	0.732789	2.28692	2.70095	0.736636	2.50774	1.92239	RasGAP1	Ras GTPase activating protein 1 [Source:FlyBase;Acc:FBgn0004390]
FBgn0004391	0.0462513	0	0.0157529	0.0191075	0	0	0.0414374	0	0	0	shtd	shattered [Source:FlyBase;Acc:FBgn0004391]
FBgn0004395	2.61019	3.69835	9.342	7.36751	2.55046	3.8982	2.84069	23.7383	2.55783	2.7135	unk	unkempt [Source:FlyBase;Acc:FBgn0004395]
FBgn0004396	0.469192	0	0	0	0.0148642	0	0.493233	0	0.0471909	0.0139808	CrebA	Cyclic-AMP response element binding protein A [Source:FlyBase;Acc:FBgn0004396]
FBgn0004397	0	0	0	0	0	0	0.0282406	0	0.0198484	0	Vinc	Vinculin [Source:FlyBase;Acc:FBgn0004397]
FBgn0004401	14.4121	9.14236	17.7702	10.623	6.65535	19.2156	17.3625	14.1794	11.5532	8.27323	Pep	Protein on ecdysone puffs [Source:FlyBase;Acc:FBgn0004401]
FBgn0004403	580.796	581.034	291.173	339.074	375.06	499.577	498.591	500.43	379.692	309.138	RpS14a	Ribosomal protein S14a [Source:FlyBase;Acc:FBgn0004403]
FBgn0004404	236.952	238.893	150.367	175.416	135.643	206.456	191.075	154.339	152.59	172.803	RpS14b	Ribosomal protein S14b [Source:FlyBase;Acc:FBgn0004404]
FBgn0004406	0	0.0298041	0	0.162011	0	0	0.0173741	0	0	0	tam	tamas [Source:FlyBase;Acc:FBgn0004406]
FBgn0004407	1.06761	2.78698	1.05901	0.28545	0.512766	2.20007	0.973207	0	0.262569	1.499	DNApol-gamma35	DNA polymerase gamma 35kD [Source:FlyBase;Acc:FBgn0004407]
FBgn0004414	0	0	0	0	0	0	0.155191	1.61295	0	0	msopa	male-specific opa containing gene [Source:FlyBase;Acc:FBgn0004414]
FBgn0004419	12.4382	18.3869	4.50236	11.1377	4.18926	7.74758	19.1667	33.5435	12.7599	8.54929	me31B	maternal expression at 31B [Source:FlyBase;Acc:FBgn0004419]
FBgn0004432	523.769	592.27	487.147	492.995	408.583	523.349	496.087	569.326	473.836	421.154	Cyp1	Cyclophilin 1 [Source:FlyBase;Acc:FBgn0004432]
FBgn0004435	29.3447	25.547	53.8052	46.5328	17.0359	29.7926	27.0697	67.1676	30.0204	19.9899	Galphaq	G protein alpha q subunit [Source:FlyBase;Acc:FBgn0004435]
FBgn0004436	44.3584	48.149	65.1365	93.8755	14.5343	47.7112	34.7446	107.968	66.8459	50.8615	Ubc6	Ubiquitin conjugating enzyme 6 [Source:FlyBase;Acc:FBgn0004436]
FBgn0004449	0.156783	0.732685	0.231649	1.06682	0.411091	17.3762	12.536	32.9884	12.3105	10.5464	Ten-m	Tenascin major [Source:FlyBase;Acc:FBgn0004449]
FBgn0004456	1.17413	1.0283	1.58042	0.609756	1.90364	0.774591	0.589412	0	1.5356	0.177319	mew	multiple edematous wings [Source:FlyBase;Acc:FBgn0004456]
FBgn0004463	0.401358	0	1.12137	0.0120904	0	0.0708203	0.0484056	0	0	0	RpIII128	RNA polymerase III 128kD subunit [Source:FlyBase;Acc:FBgn0004463]
FBgn0004465	6.14289	11.9017	5.95109	6.38222	6.53822	10.3457	11.4951	0.177521	7.48582	6.00825	Su(P)	Suppressor of ref(2)P sterility [Source:FlyBase;Acc:FBgn0004465]
FBgn0004507	0	0.154774	0	0	0	0.0220007	0.255636	0	0.611036	0.67441	GlyP	Glycogen phosphorylase [Source:FlyBase;Acc:FBgn0004507]
FBgn0004509	2.79577	2.53484	7.08246	5.15836	1.53038	4.60993	2.47153	4.28223	3.38789	2.70847	Fur1	Furin 1 [Source:FlyBase;Acc:FBgn0004509]
FBgn0004510	0	0	0	0.0539482	0.366872	1.04764	0.543216	0	0	1.53737	Ets97D	Ets at 97D [Source:FlyBase;Acc:FBgn0004510]
FBgn0004511	0.0215641	0.032101	0.205273	1.32793	0	0.0456185	0	0	0.33543	0	dy	dusky [Source:FlyBase;Acc:FBgn0004511]
FBgn0004512	0	0.0188779	0	0	0.0277015	0	0	0	0	0	Mdr49	Multi drug resistance 49 [Source:FlyBase;Acc:FBgn0004512]
FBgn0004514	0.426621	0	0	0	0.0255068	0.288362	0.231896	0	0	0.371165	Oct-TyrR	Octopamine-Tyramine receptor [Source:FlyBase;Acc:FBgn0004514]
FBgn0004556	0.0840344	0	0	0	0.535113	0.474496	0	0.526676	0	0.0104856	Dbp73D	Dead box protein 73D [Source:FlyBase;Acc:FBgn0004556]
FBgn0004567	18.0063	13.4841	41.0103	19.5719	10.7741	0	0	0	0	0	slp2	sloppy paired 2 [Source:FlyBase;Acc:FBgn0004567]
FBgn0004569	10.0582	14.0886	12.839	15.7506	8.28839	1.17471	0.21617	0	0	0	aos	argos [Source:FlyBase;Acc:FBgn0004569]
FBgn0004573	0.0583104	0	0	0.121785	0.804501	0.0178464	0.651677	4.16617	0.670916	2.17304	5-HT7	5-hydroxytryptamine (serotonin) receptor 7 [Source:FlyBase;Acc:FBgn0004573]
FBgn0004574	21.6571	22.782	41.833	31.6179	14.067	29.586	22.5502	50.3828	29.9812	20.5604	Rop	Ras opposite [Source:FlyBase;Acc:FBgn0004574]
FBgn0004575	33.766	19.9228	50.0052	44.3952	16.5865	38.0527	21.4146	77.6444	27.9593	21.9727	Syn	Synapsin [Source:FlyBase;Acc:FBgn0004575]
FBgn0004580	0.160987	0.0710533	1.81344	1.06666	0.0379678	0.656503	0.414202	0	0	0	Cbp53E	Calbindin 53E [Source:FlyBase;Acc:FBgn0004580]
FBgn0004584	2.22477	5.20738	6.74075	6.54097	5.09614	8.06066	7.84835	13.3858	13.3369	4.70997	Rrp1	Recombination repair protein 1 [Source:FlyBase;Acc:FBgn0004584]
FBgn0004587	20.2891	18.2968	33.2616	17.8953	24.7379	26.1845	22.0469	27.7855	17.3599	13.9937	B52	B52 [Source:FlyBase;Acc:FBgn0004587]
FBgn0004595	0.00177204	0.0401366	0.818564	0.624311	0	0.0660895	0.357053	1.81032	0.289208	0.0376554	pros	prospero [Source:FlyBase;Acc:FBgn0004595]
FBgn0004597	7.35928	8.17923	0.172648	1.67451	2.59367	7.27182	5.81626	2.19635	4.54869	0.888188	CycC	Cyclin C [Source:FlyBase;Acc:FBgn0004597]
FBgn0004598	0.234764	1.00792	3.44677	1.365	0.0668592	1.15987	1.94911	0.750178	1.14257	0.443633	Fur2	Furin 2 [Source:FlyBase;Acc:FBgn0004598]
FBgn0004606	3.18688	2.69544	11.1193	8.59912	5.6568	13.0571	9.28148	23.4206	15.1448	10.4118	zfh1	Zn finger homeodomain 1 [Source:FlyBase;Acc:FBgn0004606]
FBgn0004607	26.6448	20.0359	59.2909	37.562	25.5337	33.7181	33.2194	99.3795	34.116	24.8964	zfh2	Zn finger homeodomain 2 [Source:FlyBase;Acc:FBgn0004607]
FBgn0004611	2.05976	2.58872	10.6109	3.3753	2.27675	4.28272	2.31727	1.76569	2.86845	2.43359	Plc21C	Phospholipase C at 21C [Source:FlyBase;Acc:FBgn0004611]
FBgn0004618	0.00747582	0	0.76641	0.908002	0	0	0.180324	0.112449	0	0.0260975	gl	glass [Source:FlyBase;Acc:FBgn0004618]
FBgn0004619	0	0	0	0.0557324	0	0	0	1.30449	0.116884	0	GluRIA	Glutamate receptor IA [Source:FlyBase;Acc:FBgn0004619]
FBgn0004622	5.16472	2.93587	9.85167	6.24312	2.54641	2.54557	0.121054	2.24077	4.22718	0.00782735	TkR99D	Tachykinin-like receptor at 99D [Source:FlyBase;Acc:FBgn0004622]
FBgn0004629	1.14952	0	5.10282	10.8099	1.85961	1.91562	2.61588	10.0506	3.14499	0.174909	Cys	Cystatin-like [Source:FlyBase;Acc:FBgn0004629]
FBgn0004635	1.75029	0.439016	8.60402	0.104363	0.344705	76.7199	39.8507	83.9128	73.9153	47.9301	rho	rhomboid [Source:FlyBase;Acc:FBgn0004635]
FBgn0004636	20.3691	15.9876	34.1741	25.4484	23.829	25.9827	17.7815	50.327	26.186	16.798	R	Roughened [Source:FlyBase;Acc:FBgn0004636]
FBgn0004638	15.4291	10.2136	16.2007	13.4969	6.35277	9.59105	6.46993	24.7193	7.15664	4.5906	drk	downstream of receptor kinase [Source:FlyBase;Acc:FBgn0004638]
FBgn0004643	1.26352	0.0712735	0.0847039	0	0	0	1.25418	0	0	0.110344	Zw10	Zeste-white 10 [Source:FlyBase;Acc:FBgn0004643]
FBgn0004646	4.69907	1.83953	2.23351	7.93547	3.70692	3.31571	1.92766	3.08252	2.93894	2.91513	ogre	optic ganglion reduced [Source:FlyBase;Acc:FBgn0004646]
FBgn0004647	0.116555	0.329768	0.419449	0.0720759	0.210056	0.351756	0.246797	0.65119	0.411244	0.106186	N	Notch [Source:FlyBase;Acc:FBgn0004647]
FBgn0004648	21.2211	15.6712	21.8471	25.297	15.5371	32.9299	16.9973	26.5226	20.1102	19.9836	svr	silver [Source:FlyBase;Acc:FBgn0004648]
FBgn0004649	0.0273373	0	0	0	0	0.0385898	0	0	0	0.0136443	yl	yolkless [Source:FlyBase;Acc:FBgn0004649]
FBgn0004652	1.51836	0.173435	2.97133	0	0.00825012	5.05699	1.59542	10.0998	1.14176	0.2886	fru	fruitless [Source:FlyBase;Acc:FBgn0004652]
FBgn0004654	0	0	0	0	0	1.39469	0.102885	0	0	0	Pgd	Phosphogluconate dehydrogenase [Source:FlyBase;Acc:FBgn0004654]
FBgn0004655	0.892473	0.661998	1.13727	0.72498	1.10395	1.14688	0.579008	3.76499	0.269602	0.325633	wapl	wings apart-like [Source:FlyBase;Acc:FBgn0004655]
FBgn0004656	14.8236	13.1742	43.0313	22.1168	17.6228	18.6649	16.1838	82.4569	21.1006	15.6237	fs(1)h	female sterile (1) homeotic [Source:FlyBase;Acc:FBgn0004656]
FBgn0004657	3.69647	3.14797	7.33766	7.44041	4.44728	8.0147	6.52041	8.60012	4.25221	7.564	mys	myospheroid [Source:FlyBase;Acc:FBgn0004657]
FBgn0004666	4.36953	6.8924	16.4462	6.4254	4.02163	6.12297	7.79125	15.9091	5.78683	10.0126	sim	single-minded [Source:FlyBase;Acc:FBgn0004666]
FBgn0004687	50.6441	63.0969	58.6672	36.0769	12.3797	58.3585	39.0108	0.309996	58.0171	26.7345	Mlc-c	Myosin light chain cytoplasmic [Source:FlyBase;Acc:FBgn0004687]
FBgn0004698	3.38026	4.01627	13.8436	7.7697	4.44286	2.64544	4.52711	2.78078	1.04516	3.1897	mus210	mutagen-sensitive 210 [Source:FlyBase;Acc:FBgn0004698]
FBgn0004797	0	0.483532	0	0.976222	0	0	0	0	0	0	mdy	midway [Source:FlyBase;Acc:FBgn0004797]
FBgn0004811	2.35447	4.49022	2.20927	4.53	4.71831	9.97268	3.42329	6.29243	13.7706	0.171013	fs(2)ltoPP43	female sterile (2) ltoPP43 [Source:FlyBase;Acc:FBgn0004811]
FBgn0004828	148.152	120.898	242.117	292.596	268.665	223.474	177.774	396.847	254.001	191.79	His3.3B	Histone H3.3B [Source:FlyBase;Acc:FBgn0004828]
FBgn0004832	0.0221619	0.62675	0	0.384536	0.893775	2.18988	1.71061	0.888943	0	2.27861	Xpac	Xeroderma pigmentosum group A-like [Source:FlyBase;Acc:FBgn0004832]
FBgn0004837	1.21985	1.48368	3.6752	1.08747	0.439982	2.3894	3.48329	0	2.22603	2.38794	Su(H)	Suppressor of Hairless [Source:FlyBase;Acc:FBgn0004837]
FBgn0004838	56.9367	57.3925	151.2	117.514	67.2972	67.3702	70.2307	138.219	66.5627	52.5363	Hrb27C	Heterogeneous nuclear ribonucleoprotein at 27C [Source:FlyBase;Acc:FBgn0004838]
FBgn0004839	1.75528	2.59384	3.11921	2.99804	0.108709	2.9707	4.58203	21.36	1.24716	3.08602	otk	off-track [Source:FlyBase;Acc:FBgn0004839]
FBgn0004841	0	0	0	0	0.0734716	0	0	0	0	0.14512	TkR86C	Tachykinin-like receptor at 86C [Source:FlyBase;Acc:FBgn0004841]
FBgn0004852	0.272815	0	0	0	0	0	0	0.0204146	0	0	Ac76E	Adenylyl cyclase 76E [Source:FlyBase;Acc:FBgn0004852]
FBgn0004855	9.854	8.73009	8.60383	1.22942	6.48148	17.3605	12.6053	0.231974	5.84584	8.2279	RpII15	RNA polymerase II 15kD subunit [Source:FlyBase;Acc:FBgn0004855]
FBgn0004856	5.71582	4.85037	2.3018	7.77637	2.17084	8.82449	5.43183	7.68466	0.64411	3.7974	Bx42	Bx42 [Source:FlyBase;Acc:FBgn0004856]
FBgn0004858	0.374988	0.073148	0	0.0515991	0.596942	9.69775	11.6645	27.9196	10.5701	9.95945	elB	elbow B [Source:FlyBase;Acc:FBgn0004858]
FBgn0004859	2.47951	0.928156	0.392687	0.0772397	2.863	2.47958	0.519697	0	0	0.830958	ci	cubitus interruptus [Source:FlyBase;Acc:FBgn0004859]
FBgn0004860	3.23702	2.71674	2.61645	2.99191	2.5595	3.20938	1.40485	9.22993	0.27106	2.5864	ph-d	polyhomeotic distal [Source:FlyBase;Acc:FBgn0004860]
FBgn0004861	2.33123	0.844973	1.85931	0.115997	1.17641	3.14693	2.00363	2.14942	1.05138	1.51893	ph-p	polyhomeotic proximal [Source:FlyBase;Acc:FBgn0004861]
FBgn0004864	0.625449	0.710448	1.07241	1.59398	0.891112	1.00384	0.781186	7.73248	0.505196	1.05624	hop	hopscotch [Source:FlyBase;Acc:FBgn0004864]
FBgn0004865	20.4735	15.3829	42.8219	39.4757	19.5758	11.6479	11.152	29.0123	21.6456	9.63342	Eip78C	Ecdysone-induced protein 78C [Source:FlyBase;Acc:FBgn0004865]
FBgn0004867	134.261	123.869	44.2289	66.4155	38.787	112.859	122.433	79.0851	70.6186	83.6552	RpS2	Ribosomal protein S2 [Source:FlyBase;Acc:FBgn0004867]
FBgn0004868	128.08	121.674	139.68	154.976	76.848	130.495	111.435	220.347	133.583	118.085	Gdi	GDP dissociation inhibitor [Source:FlyBase;Acc:FBgn0004868]
FBgn0004870	0.694563	0.0282228	1.67832	1.38585	0.284371	0	0.0548405	0.264613	0.50613	0	bab1	bric a brac 1 [Source:FlyBase;Acc:FBgn0004870]
FBgn0004872	0	0	0	0.0447755	0	0	0.0764905	0	0	0	piwi	piwi [Source:FlyBase;Acc:FBgn0004872]
FBgn0004875	4.3298	3.05539	12.3695	10.9271	6.1538	6.75886	6.85337	10.4468	5.06604	6.08063	enc	encore [Source:FlyBase;Acc:FBgn0004875]
FBgn0004876	14.7766	17.6559	50.8591	29.2842	17.7191	5.63395	9.48661	17.3446	11.0729	6.00109	cdi	center divider [Source:FlyBase;Acc:FBgn0004876]
FBgn0004878	0.0238199	0	0	0	1.95274	0.223905	0.0382597	0	0	0.403752	cas	castor [Source:FlyBase;Acc:FBgn0004878]
FBgn0004880	57.6061	31.4861	142.653	104.078	58.8174	63.1704	66.2704	187.498	73.4116	52.2806	scrt	scratch [Source:FlyBase;Acc:FBgn0004880]
FBgn0004882	0	0.465639	0.113508	0.357922	0.0101043	0.215032	0.326143	18.3737	0.826031	0.563152	orb	oo18 RNA-binding protein [Source:FlyBase;Acc:FBgn0004882]
FBgn0004885	9.49093	8.26332	15.9691	12.4211	4.79155	31.447	22.7181	74.7054	26.4269	23.0108	tok	tolkin [Source:FlyBase;Acc:FBgn0004885]
FBgn0004888	6.4276	6.31652	0.735553	8.93891	1.1014	11.8614	7.42898	1.42674	16.5631	8.52146	Scsalpha	Succinyl coenzyme A synthetase alpha subunit [Source:FlyBase;Acc:FBgn0004888]
FBgn0004889	8.10866	6.49061	11.7145	8.97202	4.75867	7.80708	4.8567	7.15344	10.6653	3.28055	tws	twins [Source:FlyBase;Acc:FBgn0004889]
FBgn0004893	0	0.0126363	0.109253	0	0.333488	0	0	0	0	0	bowl	brother of odd with entrails limited [Source:FlyBase;Acc:FBgn0004893]
FBgn0004903	10.0355	22.5963	24.5706	26.8359	22.6423	11.79	9.09969	22.4465	1.99744	10.7089	Rb97D	Ribonuclear protein at 97D [Source:FlyBase;Acc:FBgn0004903]
FBgn0004907	157.23	142.606	238.65	213.199	172.296	224.044	152.821	305.435	266.229	163.56	14-3-3zeta	14-3-3zeta [Source:FlyBase;Acc:FBgn0004907]
FBgn0004908	61.7775	27.2876	0.437291	23.505	0	10.3882	20.4302	30.9432	15.9002	19.2104	Arl2	ADP ribosylation factor-like 2 [Source:FlyBase;Acc:FBgn0004908]
FBgn0004910	0.0178797	0.106534	4.39067	0.327469	0.10372	3.98779	0.447893	0	2.09347	0.642243	Eip63F-1	Ecdysone-induced protein 63F 1 [Source:FlyBase;Acc:FBgn0004910]
FBgn0004913	0	0.449126	0.995321	1.39508	0.871359	1.41435	0.255103	0.767498	2.87188	0	Gnf1	Germ line transcription factor 1 [Source:FlyBase;Acc:FBgn0004913]
FBgn0004914	0.719355	0.915973	0	0	0	0	0.180735	0	0	0.0113327	Hnf4	Hepatocyte nuclear factor 4 [Source:FlyBase;Acc:FBgn0004914]
FBgn0004915	5.57251	11.2751	13.3625	17.9634	14.3182	23.2288	12.5122	21.057	1.00143	8.51012	TfIIB	Transcription factor IIB [Source:FlyBase;Acc:FBgn0004915]
FBgn0004919	13.6893	14.5757	16.8342	19.7758	7.72126	33.2174	23.7779	73.8472	28.4425	20.6372	gol	goliath [Source:FlyBase;Acc:FBgn0004919]
FBgn0004921	310.149	370.582	163.323	276.347	161.062	357.743	318.525	487.84	274.92	209.579	Ggamma1	G protein gamma 1 [Source:FlyBase;Acc:FBgn0004921]
FBgn0004924	4.73266	6.18225	18.0495	11.8152	4.75556	7.16203	6.27736	31.3889	10.5083	6.98968	Top1	Topoisomerase 1 [Source:FlyBase;Acc:FBgn0004924]
FBgn0004926	13.8893	11.4905	15.9152	13.6373	4.82251	9.78682	10.3277	20.6692	6.51089	9.63291	eIF-2beta	Eukaryotic initiation factor 2beta [Source:FlyBase;Acc:FBgn0004926]
FBgn0004957	2.54941	1.25596	7.214	1.81696	0	0.836081	2.97594	1.03293	3.72116	0.809731	por	porcupine [Source:FlyBase;Acc:FBgn0004957]
FBgn0005198	1.55402	0.701477	0.0886319	2.80948	0.0946898	1.01802	0.408916	0	0	0.285747	gig	gigas [Source:FlyBase;Acc:FBgn0005198]
FBgn0005278	43.1635	28.3649	59.4801	29.6087	18.7066	33.9154	22.5628	40.3284	26.2226	22.545	Sam-S	S-adenosylmethionine Synthetase [Source:FlyBase;Acc:FBgn0005278]
FBgn0005322	6.77832	8.38686	6.07731	5.3949	4.54527	1.32735	4.64867	36.3481	22.4721	4.11925	nmd	no mitochondrial derivative [Source:FlyBase;Acc:FBgn0005322]
FBgn0005355	1.71188	1.82143	5.13817	1.65018	3.37408	4.35835	1.32725	4.29161	3.296	0.228861	Su(fu)	Suppressor of fused [Source:FlyBase;Acc:FBgn0005355]
FBgn0005386	0.792616	0.714802	0.494046	2.8348	0.457676	1.05934	0.79435	0.575634	0.820874	0.729589	ash1	absent, small, or homeotic discs 1 [Source:FlyBase;Acc:FBgn0005386]
FBgn0005411	24.6121	14.7507	18.5137	16.312	10.1769	14.2927	19.0844	0.0942726	20.146	6.85059	U2af50	U2 small nuclear riboprotein auxiliary factor 50 [Source:FlyBase;Acc:FBgn0005411]
FBgn0005427	4.84648	10.1203	14.4783	20.2479	14.936	8.96128	6.62295	8.21863	7.76785	7.91377	ewg	erect wing [Source:FlyBase;Acc:FBgn0005427]
FBgn0005533	256.203	244.489	200.634	160.991	245.244	210.553	210.035	105.394	225.697	199.05	RpS17	Ribosomal protein S17 [Source:FlyBase;Acc:FBgn0005533]
FBgn0005536	3.59948	5.28868	7.97728	8.844	8.39543	6.76536	3.60198	7.80771	2.03212	2.26631	Mbs	Myosin binding subunit [Source:FlyBase;Acc:FBgn0005536]
FBgn0005558	0	0.0471873	0	0	0	0	0.350773	0	0.785579	0	ey	eyeless [Source:FlyBase;Acc:FBgn0005558]
FBgn0005561	0.198401	0.425248	0	0.0395345	0	0.0502239	0.0114426	0	0	0	sv	shaven [Source:FlyBase;Acc:FBgn0005561]
FBgn0005564	3.1728	3.97435	6.6384	7.18979	5.33501	5.74007	3.15112	16.9453	2.92049	4.44572	Shal	Shaker cognate l [Source:FlyBase;Acc:FBgn0005564]
FBgn0005585	26.167	26.2452	21.2387	19.1237	10.4349	26.2821	41.9492	54.3676	22.5557	15.7662	Crc	Calreticulin [Source:FlyBase;Acc:FBgn0005585]
FBgn0005586	35.795	45.7636	106.805	84.0583	56.6442	40.5124	32.2825	59.0298	38.838	36.6217	Rab3	Rab3 [Source:FlyBase;Acc:FBgn0005586]
FBgn0005593	136.917	166.825	114.281	86.2055	97.3461	151.163	114.974	178.014	156.728	92.3875	RpL7	Ribosomal protein L7 [Source:FlyBase;Acc:FBgn0005593]
FBgn0005596	0.70176	0.216646	0.248332	0.467558	1.10741	0.0582714	0.58747	0	0.93885	0.165248	yem	yemanuclein [Source:FlyBase;Acc:FBgn0005596]
FBgn0005612	0.156179	0	0	0.0238394	0.115306	0	2.17733	0.476649	0	0.00919131	Sox14	Sox box protein 14 [Source:FlyBase;Acc:FBgn0005612]
FBgn0005614	0.833852	0.460687	0.377996	2.21886	1.22146	2.10537	0.855519	1.03044	2.21596	0.539274	trpl	transient receptor potential-like [Source:FlyBase;Acc:FBgn0005614]
FBgn0005616	2.77203	2.58119	4.09877	3.83819	2.54629	2.40021	2.96935	3.88368	5.17426	3.22684	msl-2	male-specific lethal 2 [Source:FlyBase;Acc:FBgn0005616]
FBgn0005617	0.557554	0.531277	1.23435	1.86319	0.769253	0.840461	1.00321	0.765092	2.67481	0.0292927	msl-1	male-specific lethal 1 [Source:FlyBase;Acc:FBgn0005617]
FBgn0005624	1.93441	1.21	3.55859	3.08138	4.15151	2.76155	2.50142	5.05706	1.87026	4.10107	Psc	Posterior sex combs [Source:FlyBase;Acc:FBgn0005624]
FBgn0005626	0.162418	0	1.75175	0	0	0	0	0	0	0	ple	pale [Source:FlyBase;Acc:FBgn0005626]
FBgn0005631	2.72784	3.16431	8.22862	3.99759	3.059	3.2743	3.04255	9.38118	4.22909	1.73189	robo	roundabout [Source:FlyBase;Acc:FBgn0005631]
FBgn0005632	3.96447	3.80945	7.80227	5.42536	2.90901	4.74006	3.70525	14.4416	4.96406	4.26305	faf	fat facets [Source:FlyBase;Acc:FBgn0005632]
FBgn0005636	0	2.54833	2.9813	1.36563	0.721089	3.24451	14.2345	25.5129	14.2913	14.1422	nvy	nervy [Source:FlyBase;Acc:FBgn0005636]
FBgn0005640	4.35216	7.04597	9.11976	5.60623	3.94364	2.44637	5.72081	2.29258	2.81848	2.28659	Eip63E	Ecdysone-induced protein 63E [Source:FlyBase;Acc:FBgn0005640]
FBgn0005642	0.792672	1.30963	1.18743	3.0564	0	1.12885	0.663276	0.351716	1.05179	0.665219	wdn	wings down [Source:FlyBase;Acc:FBgn0005642]
FBgn0005648	25.8046	25.7099	28.4974	15.6425	17.4534	21.5866	23.6686	17.0066	20.1616	15.1677	Pabp2	Pabp2 [Source:FlyBase;Acc:FBgn0005648]
FBgn0005649	22.4376	22.0956	54.6676	24.1945	19.8218	22.0977	17.332	39.0106	25.6028	17.8003	Rox8	Rox8 [Source:FlyBase;Acc:FBgn0005649]
FBgn0005654	0.0947029	0.0376184	0.0677359	0.0182579	0.0603048	0.213894	0.0639609	0.117841	0.813685	0.0283603	lat	latheo [Source:FlyBase;Acc:FBgn0005654]
FBgn0005655	0	0	0	0	0	0.0777082	0.185897	0	0	0	PCNA	Proliferating cell nuclear antigen [Source:FlyBase;Acc:FBgn0005655]
FBgn0005658	0.0320359	0	0.229136	0	0	0	0	0	0	0	Ets65A	Ets at 65A [Source:FlyBase;Acc:FBgn0005658]
FBgn0005666	0.0265719	0.0447789	0	0.00465712	0	0.00424013	0.0792433	0	0	0.0029984	bt	bent [Source:FlyBase;Acc:FBgn0005666]
FBgn0005671	13.5376	5.70908	16.4348	12.1351	11.6178	5.9609	5.91747	13.1982	8.01981	3.67697	Vha55	Vacuolar H[+]-ATPase 55kD subunit [Source:FlyBase;Acc:FBgn0005671]
FBgn0005672	40.1228	59.8493	75.4355	50.3356	53.5216	58.8629	52.1135	145.331	61.7811	41.6378	spi	spitz [Source:FlyBase;Acc:FBgn0005672]
FBgn0005674	1.09256	0.965212	1.87751	0.846817	1.26288	1.04154	1.3211	0.426858	5.24702	0.835668	Aats-glupro	Glutamyl-prolyl-tRNA synthetase [Source:FlyBase;Acc:FBgn0005674]
FBgn0005677	13.5678	11.5393	34.416	23.1353	15.1734	26.2574	21.6703	58.2048	31.4963	18.821	dac	dachshund [Source:FlyBase;Acc:FBgn0005677]
FBgn0005683	0	0.244787	0	1.66105	0.872024	0.629641	0.896059	0	3.88325	0.0670166	pie	pineapple eye [Source:FlyBase;Acc:FBgn0005683]
FBgn0005694	3.58311	2.60218	4.95018	2.10836	3.03862	1.65749	1.98206	7.44387	2.10564	3.46229	Aef1	Adult enhancer factor 1 [Source:FlyBase;Acc:FBgn0005694]
FBgn0005695	1.4872	0.812285	3.16898	3.84146	0.710263	2.80788	2.91465	10.3462	0.313186	1.12269	gcl	germ cell-less [Source:FlyBase;Acc:FBgn0005695]
FBgn0005771	1.2148	0	0	1.68661	0	7.72133	14.423	25.0359	20.9486	10.3352	noc	no ocelli [Source:FlyBase;Acc:FBgn0005771]
FBgn0005775	0.563263	0	0.728956	1.80313	0.440214	1.38215	0.238447	0.0588364	1.62946	0.52366	Con	Connectin [Source:FlyBase;Acc:FBgn0005775]
FBgn0005777	1.76745	5.31104	10.5795	0.828849	2.0076	3.91152	5.73966	4.85781	1.3681	3.91692	PpD3	Protein phosphatase D3 [Source:FlyBase;Acc:FBgn0005777]
FBgn0008635	1.74939	0.747503	1.11332	3.02331	1.46459	2.30221	3.12021	0	4.09789	1.18274	betaCOP	Coat Protein (coatomer) beta [Source:FlyBase;Acc:FBgn0008635]
FBgn0010014	58.6277	64.5662	75.6764	110.689	57.4091	95.5616	73.3931	102.08	85.1121	36.8286	CanB	Calcineurin B [Source:FlyBase;Acc:FBgn0010014]
FBgn0010015	0	0	0	0	0	0	0.322311	0	0	0.00900998	CanA1	Calcineurin A1 [Source:FlyBase;Acc:FBgn0010015]
FBgn0010039	5.42673	0	0	0	0	0	0	0	0	1.77812	GstD3	Glutathione S transferase D3 [Source:FlyBase;Acc:FBgn0010039]
FBgn0010051	0	0.00206864	0.203612	0.469759	0.299887	0.976952	0.177802	0.261089	0.269065	0.410831	Itp-r83A	Inositol 1,4,5,-tris-phosphate receptor [Source:FlyBase;Acc:FBgn0010051]
FBgn0010078	196.609	162.239	212.426	188.574	227.155	152.357	158.17	122.958	127.377	169.955	RpL23	Ribosomal protein L23 [Source:FlyBase;Acc:FBgn0010078]
FBgn0010097	0.0298599	0.0296528	0	0	0.0950708	0	0.249867	0	0	0.016157	gammaTub37C	gamma-Tubulin at 37C [Source:FlyBase;Acc:FBgn0010097]
FBgn0010100	14.2849	13.1094	22.8525	18.0642	9.67629	8.63607	11.2682	14.5035	10.1942	7.18163	Acon	Aconitase [Source:FlyBase;Acc:FBgn0010100]
FBgn0010105	107.077	95.904	155.433	97.2456	53.0283	3.8642	2.83579	1.83844	1.33498	0.690332	comm	commissureless [Source:FlyBase;Acc:FBgn0010105]
FBgn0010109	0	0	0	0	0	0	0	3.06162	0.174688	0	dpn	deadpan [Source:FlyBase;Acc:FBgn0010109]
FBgn0010113	0.672633	0.0407283	0.666898	0.390511	0.786285	0.391285	1.05613	0.148908	0.57687	0.66633	hdc	headcase [Source:FlyBase;Acc:FBgn0010113]
FBgn0010114	2.11124	0.861564	1.06569	5.60758	2.40815	2.27667	1.31566	0.0278845	1.78954	0.449674	hig	hikaru genki [Source:FlyBase;Acc:FBgn0010114]
FBgn0010173	1.87763	2.13562	6.0902	7.53445	1.2049	1.84918	1.63255	0	0	4.79468	RpA-70	Replication Protein A 70 [Source:FlyBase;Acc:FBgn0010173]
FBgn0010194	1.54578	2.16105	3.18876	3.09737	0.0121358	1.36184	0.740421	4.78733	1.17512	0.0328303	Wnt5	Wnt oncogene analog 5 [Source:FlyBase;Acc:FBgn0010194]
FBgn0010198	126.129	157.208	113.304	65.5153	102.479	145.957	134.285	133.263	107.346	126.573	RpS15Aa	Ribosomal protein S15Aa [Source:FlyBase;Acc:FBgn0010198]
FBgn0010213	17.9622	41.1487	12.2135	16.7522	0.412922	28.8341	36.632	40.9663	24.8532	26.9924	Sod2	Superoxide dismutase 2 (Mn) [Source:FlyBase;Acc:FBgn0010213]
FBgn0010215	24.7322	20.0071	34.08	34.8082	22.5415	27.9959	20.031	33.4714	27.2212	20.873	alpha-Cat	alpha Catenin [Source:FlyBase;Acc:FBgn0010215]
FBgn0010217	193.871	178.454	178.784	178.724	128.492	209.481	142.357	173.888	159.639	127.113	ATPsyn-beta	ATP synthase-beta [Source:FlyBase;Acc:FBgn0010217]
FBgn0010220	1.11563	2.04312	0	0.614524	0.615072	0.449953	1.57965	0.14529	0.512591	0.477275	Dbp45A	DEAD box protein 45A [Source:FlyBase;Acc:FBgn0010220]
FBgn0010222	3.53261	2.55059	9.67362	4.71955	2.04293	3.65289	2.49609	0	0.764836	1.8807	Nmdmc	NAD-dependent methylenetetrahydrofolate dehydrogenase [Source:FlyBase;Acc:FBgn0010222]
FBgn0010223	0	0	0	0	0	0.184409	0	0	0	0.130405	Galphaf	G protein alpha f subunit [Source:FlyBase;Acc:FBgn0010223]
FBgn0010225	1.3226	1.37471	1.74481	1.21211	0.411743	0.672118	0.567971	0	0.891271	0.352064	Gel	Gelsolin [Source:FlyBase;Acc:FBgn0010225]
FBgn0010226	0.0152056	0	0.362525	0.0344255	0	5.41694	10.8909	0	4.53419	13.3427	GstS1	Glutathione S transferase S1 [Source:FlyBase;Acc:FBgn0010226]
FBgn0010228	278.522	327.526	336.519	214.927	111.245	215.595	134.416	230.392	141.977	122.507	HmgZ	HMG protein Z [Source:FlyBase;Acc:FBgn0010228]
FBgn0010235	12.7564	17.8613	3.44424	9.81042	4.38131	18.5846	10.4901	8.10314	9.54691	6.93162	Klc	Kinesin light chain [Source:FlyBase;Acc:FBgn0010235]
FBgn0010238	52.8692	59.7393	43.9637	42.6691	23.8785	16.6727	51.4475	17.8634	30.793	24.841	Lac	Lachesin [Source:FlyBase;Acc:FBgn0010238]
FBgn0010240	29.3263	28.8677	49.1612	36.8609	46.3148	19.05	12.2087	8.23831	17.8518	8.34551	Lcch3	Ligand-gated chloride channel homolog 3 [Source:FlyBase;Acc:FBgn0010240]
FBgn0010241	0.00513811	0.0816395	0	0.247646	0.0327184	0.130554	0.133851	0	0	0.0307738	Mdr50	Multi drug resistance 50 [Source:FlyBase;Acc:FBgn0010241]
FBgn0010246	0.153967	0	0	0	0	0.0173873	0.0653631	0	0.711493	0.0491816	Myo61F	Myosin 61F [Source:FlyBase;Acc:FBgn0010246]
FBgn0010247	9.50677	7.05562	5.16062	12.3112	0.763201	6.55767	5.52291	4.86757	1.19939	4.54393	Parp	Poly-(ADP-ribose) polymerase [Source:FlyBase;Acc:FBgn0010247]
FBgn0010263	43.5864	43.7749	99.3907	88.2338	31.803	55.1545	63.4791	151.168	72.9172	50.6387	Rbp9	RNA-binding protein 9 [Source:FlyBase;Acc:FBgn0010263]
FBgn0010265	289.034	310.524	266.312	227.081	191.342	237.159	222.789	193.34	151.868	183.377	RpS13	Ribosomal protein S13 [Source:FlyBase;Acc:FBgn0010265]
FBgn0010269	0.677425	2.6739	0.743726	4.46305	0.0281941	2.64842	3.46915	3.62205	4.28726	3.88418	Dsor1	Downstream of raf1 [Source:FlyBase;Acc:FBgn0010269]
FBgn0010278	3.92985	3.79393	4.19556	4.11341	4.93522	2.1366	5.46316	6.2632	6.2366	2.66681	Ssrp	Structure specific recognition protein [Source:FlyBase;Acc:FBgn0010278]
FBgn0010280	3.30159	4.99288	5.22565	6.89073	3.51437	3.40034	3.95966	18.2473	1.78872	3.30157	Taf4	TBP-associated factor 4 [Source:FlyBase;Acc:FBgn0010280]
FBgn0010282	2.49889	2.61471	1.77279	1.80955	5.51112	5.26539	3.99876	0	1.84824	2.74997	TfIIFalpha	Transcription factor IIFalpha [Source:FlyBase;Acc:FBgn0010282]
FBgn0010287	0.140248	0.139275	0.267498	0	0	0.395952	1.54261	0	0	0	Trf	TBP-related factor [Source:FlyBase;Acc:FBgn0010287]
FBgn0010288	27.244	33.4845	30.7255	36.8468	27.466	31.1466	55.8453	53.4971	67.2995	37.1312	Uch	Ubiquitin carboxy-terminal hydrolase [Source:FlyBase;Acc:FBgn0010288]
FBgn0010292	0.0324483	1.91728	0	0.500459	3.75366	1.83218	0.986178	0	0	0.0161952	bys	by S6 [Source:FlyBase;Acc:FBgn0010292]
FBgn0010300	32.4735	25.1368	93.2546	57.2004	32.3765	39.2894	50.4157	133.737	59.0861	41.7085	brat	brain tumor [Source:FlyBase;Acc:FBgn0010300]
FBgn0010303	5.35677	1.6203	6.04637	6.81249	1.88699	3.98107	2.13167	9.71379	2.81158	3.13923	hep	hemipterous [Source:FlyBase;Acc:FBgn0010303]
FBgn0010309	3.36366	0.883795	1.03585	1.6077	1.88904	1.52338	2.07291	0.24595	0.106252	2.22446	pigeon	pigeon [Source:FlyBase;Acc:FBgn0010309]
FBgn0010313	20.348	19.0443	52.7723	28.5648	9.97324	25.2168	26.498	80.7613	31.8022	22.6871	corto	corto [Source:FlyBase;Acc:FBgn0010313]
FBgn0010315	0.0651532	0	0.31067	1.42274	0	0.030657	0.188586	0	0	0.19582	CycD	Cyclin D [Source:FlyBase;Acc:FBgn0010315]
FBgn0010316	1.9406	0.439208	0	0.870071	0.498125	2.11505	1.44564	5.70223	5.12448	2.00923	dap	dacapo [Source:FlyBase;Acc:FBgn0010316]
FBgn0010317	7.40446	7.57359	2.74126	4.41372	0.858276	2.52097	1.08912	1.43606	0.652829	2.57344	CycJ	Cyclin J [Source:FlyBase;Acc:FBgn0010317]
FBgn0010328	3.46094	2.44765	4.21611	1.90779	2.27548	2.30227	1.84765	8.86654	4.0443	2.38719	woc	without children [Source:FlyBase;Acc:FBgn0010328]
FBgn0010329	1.42618	1.50916	5.57399	5.33003	0.558293	0.0165016	0.00563945	0	0	0	Tbh	Tyramine beta hydroxylase [Source:FlyBase;Acc:FBgn0010329]
FBgn0010333	11.0881	17.8833	36.5305	33.1367	28.7314	20.4173	19.8134	35.487	22.2022	18.3462	Rac1	Rac1 [Source:FlyBase;Acc:FBgn0010333]
FBgn0010339	4.1372	8.93404	6.09503	2.59601	9.32009	2.25892	3.82226	0.097847	3.84662	4.32464	128up	upstream of RpIII128 [Source:FlyBase;Acc:FBgn0010339]
FBgn0010340	4.63838	2.10994	0	2.44977	3.63025	3.24391	1.36109	0	1.81493	1.64592	140up	upstream of RpII140 [Source:FlyBase;Acc:FBgn0010340]
FBgn0010341	1.49736	3.02875	3.2638	6.73599	3.75567	3.22416	2.27308	4.52654	1.47663	1.22363	Cdc42	Cdc42 [Source:FlyBase;Acc:FBgn0010341]
FBgn0010342	4.86755	1.45013	5.73976	11.1342	4.74706	3.86267	4.69639	1.05537	3.08068	3.2305	Map60	Microtubule-associated protein 60 [Source:FlyBase;Acc:FBgn0010342]
FBgn0010348	49.9761	55.773	13.8535	44.3476	16.3319	56.3723	46.2314	37.0039	19.772	17.0926	Arf79F	ADP ribosylation factor at 79F [Source:FlyBase;Acc:FBgn0010348]
FBgn0010350	9.33698	16.9254	18.6855	13.5611	7.7797	16.2037	9.91075	19.4101	3.61966	8.6219	CdsA	CDP diglyceride synthetase [Source:FlyBase;Acc:FBgn0010350]
FBgn0010352	4.56718	3.51655	16.9622	4.24869	3.81718	6.64565	2.80632	1.32378	4.36989	2.87889	Nc73EF	Neural conserved at 73EF [Source:FlyBase;Acc:FBgn0010352]
FBgn0010355	1.60205	1.78362	1.82652	2.25958	1.3311	0.857638	2.2625	5.95065	0.225622	1.78017	Taf1	TBP-associated factor 1 [Source:FlyBase;Acc:FBgn0010355]
FBgn0010356	2.11438	0.348339	0.0464609	1.35252	0	0.880277	1.7486	1.2702	0	0.29179	Taf5	TBP-associated factor 5 [Source:FlyBase;Acc:FBgn0010356]
FBgn0010379	5.48579	3.11109	7.43726	6.28896	5.57139	4.73058	2.90227	1.96626	5.21781	2.95376	Akt1	Akt1 [Source:FlyBase;Acc:FBgn0010379]
FBgn0010380	8.60442	6.4789	13.4125	22.5844	9.16853	11.1608	8.5219	22.4892	12.6329	10.1207	AP-1-2beta	Adaptor Protein complex 1/2, beta subunit [Source:FlyBase;Acc:FBgn0010380]
FBgn0010382	0.00596075	0	0	1.33838	0.295516	0	0.0387796	0	0	0	CycE	Cyclin E [Source:FlyBase;Acc:FBgn0010382]
FBgn0010387	0.15028	2.83552	0	0	0	0	1.30496	0	0	0	Dbi	Diazepam-binding inhibitor [Source:FlyBase;Acc:FBgn0010387]
FBgn0010391	0.61526	1.21067	0.325972	1.44976	1.11247	1.96219	0.835472	0	0.0383899	0.272962	Gtp-bp	GTP-binding protein [Source:FlyBase;Acc:FBgn0010391]
FBgn0010395	2.19661	0.317731	0.0173633	0	0	0.171901	0.734647	0	0.48228	0.0436189	Itgbetanu	Integrin betanu subunit [Source:FlyBase;Acc:FBgn0010395]
FBgn0010397	0.311062	0.00965325	0.440337	0.131184	0	0.987973	0.600247	0.73108	2.17807	0	LamC	Lamin C [Source:FlyBase;Acc:FBgn0010397]
FBgn0010398	1.96665	2.44127	0	0.296214	0	2.77616	0.537868	0	6.26406	0.22765	Lrr47	Leucine-rich repeat 47 [Source:FlyBase;Acc:FBgn0010398]
FBgn0010399	2.28935	1.69467	4.66949	3.94801	3.51078	5.81109	3.48046	5.23909	2.68919	1.84499	Nmdar1	NMDA receptor 1 [Source:FlyBase;Acc:FBgn0010399]
FBgn0010406	11.6774	3.09431	15.1354	4.54753	3.24512	8.67365	2.87992	6.2784	12.1178	3.29933	RNaseX25	Ribonuclease X25 [Source:FlyBase;Acc:FBgn0010406]
FBgn0010407	10.2117	8.48263	7.87301	5.62505	2.13966	10.1212	9.65161	2.87842	9.82417	6.21257	Ror	Ror [Source:FlyBase;Acc:FBgn0010407]
FBgn0010408	245.491	280.896	171.235	176.942	196.608	265.062	252.282	129.808	251.859	189.607	RpS9	Ribosomal protein S9 [Source:FlyBase;Acc:FBgn0010408]
FBgn0010409	256.342	237.826	197.615	191.368	169.709	245.755	200.754	270.908	207.932	201.471	RpL18A	Ribosomal protein L18A [Source:FlyBase;Acc:FBgn0010409]
FBgn0010411	233.131	225.501	135.014	167.565	210.916	209.531	182.248	222.528	142.999	209.977	RpS18	Ribosomal protein S18 [Source:FlyBase;Acc:FBgn0010411]
FBgn0010412	189.236	192.461	148.148	185.264	131.932	194.138	170.731	184.754	173.426	116.608	RpS19a	Ribosomal protein S19a [Source:FlyBase;Acc:FBgn0010412]
FBgn0010415	72.4602	74.5388	156.675	136.708	70.9458	93.3605	75.2415	189.728	87.346	63.0121	Sdc	Syndecan [Source:FlyBase;Acc:FBgn0010415]
FBgn0010416	2.17143	1.20198	2.82819	1.39544	0	4.76813	1.7944	3.62913	0.101618	2.67962	TH1	TH1 [Source:FlyBase;Acc:FBgn0010416]
FBgn0010417	10.9835	7.70528	4.81508	6.47998	5.01339	4.05879	8.18982	9.31171	13.2637	9.46268	Taf6	TBP-associated factor 6 [Source:FlyBase;Acc:FBgn0010417]
FBgn0010421	5.55862	4.02704	0.231484	11.58	3.18854	6.37674	3.96913	36.7197	2.2256	0.854993	TfIIFbeta	Transcription factor TFIIFbeta [Source:FlyBase;Acc:FBgn0010421]
FBgn0010422	10.7946	9.19341	4.77224	3.68673	5.50055	11.4536	8.5355	9.58807	9.09285	2.74737	TfIIS	RNA polymerase II elongation factor [Source:FlyBase;Acc:FBgn0010422]
FBgn0010431	0	0.0485067	0	0	0	0	0.447716	0	5.8426	0	mtrm	matrimony [Source:FlyBase;Acc:FBgn0010431]
FBgn0010434	4.65197	2.68021	5.49434	5.22781	2.53365	5.4936	2.25861	15.2697	7.12213	2.57729	cora	coracle [Source:FlyBase;Acc:FBgn0010434]
FBgn0010435	0.0102839	0	0	0	0	0	0.430599	0	0	0	emp	epithelial membrane protein [Source:FlyBase;Acc:FBgn0010435]
FBgn0010438	1.76833	4.95206	0	10.2276	6.03233	3.18462	9.74942	2.84987	18.4066	14.5628	mtSSB	mitochondrial single stranded DNA-binding protein [Source:FlyBase;Acc:FBgn0010438]
FBgn0010452	2.10112	1.24012	2.07938	4.87878	0.42074	8.82332	7.17822	5.66498	6.66768	7.32108	trn	tartan [Source:FlyBase;Acc:FBgn0010452]
FBgn0010453	0	0.0131145	0	0	0.325034	0.0216161	0.114676	0	0	0.0229287	Wnt4	Wnt oncogene analog 4 [Source:FlyBase;Acc:FBgn0010453]
FBgn0010470	1.10329	0.0782606	0.186994	0	0.125454	0.158381	0.551257	0	0.265528	0.0590003	Fkbp14	FK506-binding protein 14 ortholog [Source:FlyBase;Acc:FBgn0010470]
FBgn0010473	43.9288	39.1116	101.519	54.5874	40.2866	18.6347	34.0313	52.9871	29.0876	20.4367	tutl	turtle [Source:FlyBase;Acc:FBgn0010473]
FBgn0010482	0.00982506	0	0.00943985	0	0	0	0	0	0	0	l(2)01289	lethal (2) 01289 [Source:FlyBase;Acc:FBgn0010482]
FBgn0010488	9.96635	13.7725	27.0435	26.6595	10.1578	19.2165	18.0404	36.1464	15.1752	17.7038	NAT1	NAT1 [Source:FlyBase;Acc:FBgn0010488]
FBgn0010501	1.89115	2.09034	0.282954	0.952623	1.16536	1.71895	1.84077	11.0795	3.66433	0.57623	Dcp-1	Death caspase-1 [Source:FlyBase;Acc:FBgn0010501]
FBgn0010504	0.834461	0.226001	2.7491	0.117001	0	0.342672	0.146385	0	1.27817	0.439205	kermit	kermit [Source:FlyBase;Acc:FBgn0010504]
FBgn0010516	6.9697	5.01054	3.21088	6.53586	1.22526	1.92296	4.82687	0	0.936467	1.20529	wal	walrus [Source:FlyBase;Acc:FBgn0010516]
FBgn0010520	6.35046	14.2195	15.044	15.8303	21.6358	7.53694	3.47335	29.0013	0	7.83309	Bka	Bekka [Source:FlyBase;Acc:FBgn0010520]
FBgn0010531	4.62435	0.0318964	0.207405	0.11181	0	0.816118	0.154949	0	3.71279	0	Ccs	Copper chaperone for superoxide dismutase [Source:FlyBase;Acc:FBgn0010531]
FBgn0010548	4.73948	3.76759	11.7609	9.80405	5.68669	5.04096	4.82151	7.42617	1.63519	2.45548	Aldh-III	Aldehyde dehydrogenase type III [Source:FlyBase;Acc:FBgn0010548]
FBgn0010551	23.0805	23.0296	25.376	18.3985	21.946	13.0636	19.8081	5.80476	8.26121	18.6667	Phb2	Prohibitin 2 [Source:FlyBase;Acc:FBgn0010551]
FBgn0010575	13.6047	14.3922	41.1118	19.9582	12.4746	6.03794	9.2358	20.8566	4.89879	6.28679	sbb	scribbler [Source:FlyBase;Acc:FBgn0010575]
FBgn0010583	5.3972	8.1254	15.2823	10.7863	5.34792	10.1642	8.24821	19.6687	14.6065	7.93962	dock	dreadlocks [Source:FlyBase;Acc:FBgn0010583]
FBgn0010590	27.7244	23.6667	7.24486	15.4031	43.4835	12.2421	30.439	0	43.0834	26.6525	Prosbeta1	Proteasome beta1 subunit [Source:FlyBase;Acc:FBgn0010590]
FBgn0010591	0	0	0.0556215	0	0	0.164662	0.135056	0	0	0	Sply	Sphingosine-1-phosphate lyase [Source:FlyBase;Acc:FBgn0010591]
FBgn0010602	15.88	19.2093	2.9088	23.1233	13.1202	28.4791	19.4049	2.17063	12.7852	11.5664	lwr	lesswright [Source:FlyBase;Acc:FBgn0010602]
FBgn0010607	4.33217	7.33811	8.7327	1.46537	4.8071	7.87584	3.48788	3.3654	1.05434	1.26775	l(2)05714	lethal (2) 05714 [Source:FlyBase;Acc:FBgn0010607]
FBgn0010611	4.17333	4.53908	1.27182	5.41495	2.75592	2.54347	2.62047	0	0.178559	0.555453	Hmgs	HMG Coenzyme A synthase [Source:FlyBase;Acc:FBgn0010611]
FBgn0010612	511.283	762.074	193.751	274.53	346.242	565.059	479.877	302.894	318.587	322.047	l(2)06225	lethal (2) 06225 [Source:FlyBase;Acc:FBgn0010612]
FBgn0010621	6.58573	5.94869	6.90877	7.37193	4.33233	6.82132	9.71344	0.891675	1.71989	4.59553	Cct5	T-complex Chaperonin 5 [Source:FlyBase;Acc:FBgn0010621]
FBgn0010622	28.2286	33.1911	14.0094	18.169	2.55836	27.7862	25.6269	40.9461	15.6247	11.3054	l(2)06496	lethal (2) 06496 [Source:FlyBase;Acc:FBgn0010622]
FBgn0010638	36.2098	43.9034	18.8027	29.0202	7.64564	28.9023	26.4128	55.3214	17.5662	17.5239	Sec61beta	Sec61 beta subunit [Source:FlyBase;Acc:FBgn0010638]
FBgn0010660	0.0728794	0.442284	0.733634	0.866447	0.0257822	0.114308	0.47659	0.142104	0.0750321	0.489039	Nup214	Nucleoporin 214kD [Source:FlyBase;Acc:FBgn0010660]
FBgn0010741	38.5039	28.0857	42.1967	4.59599	3.52673	48.744	40.5652	23.9056	22.6367	29.782	l(3)01239	lethal (3) 01239 [Source:FlyBase;Acc:FBgn0010741]
FBgn0010747	2.75134	6.55277	5.94813	6.36071	2.40033	3.0939	2.22716	0	3.00501	2.87445	Srp54k	Signal recognition particle protein 54k [Source:FlyBase;Acc:FBgn0010747]
FBgn0010750	5.25546	4.25005	4.58566	3.3771	3.33166	2.88088	2.80346	2.74411	3.40616	3.65891	atms	antimeros [Source:FlyBase;Acc:FBgn0010750]
FBgn0010762	3.21785	6.16315	10.8928	5.562	3.51679	8.89428	6.49953	14.5761	2.42003	3.73263	simj	simjang [Source:FlyBase;Acc:FBgn0010762]
FBgn0010768	0.0205268	0.0203844	0.734087	0.10553	0	0	0.125432	0.926278	0	0.0614709	sqz	squeeze [Source:FlyBase;Acc:FBgn0010768]
FBgn0010770	0	0	0	0	0.0711741	0	0.355878	0	0	0	ppan	peter pan [Source:FlyBase;Acc:FBgn0010770]
FBgn0010772	12.9214	14.909	33.3106	18.1073	14.648	15.9708	13.2329	38.4439	9.61783	10.5253	Xe7	Xe7 [Source:FlyBase;Acc:FBgn0010772]
FBgn0010774	44.3242	54.2427	42.5888	49.76	28.4692	65.8591	54.1194	106.96	61.5223	48.2247	Ref1	RNA and export factor binding protein 1 [Source:FlyBase;Acc:FBgn0010774]
FBgn0010786	0.151714	1.3914	0.574478	0.929086	0	1.86446	0.301368	2.85305	0	0.463239	l(3)02640	lethal (3) 02640 [Source:FlyBase;Acc:FBgn0010786]
FBgn0010803	0.574293	0.0712886	0.616141	7.03063	0.82282	1.49976	1.46836	0	0	1.17521	Aats-trp	Tryptophanyl-tRNA synthetase [Source:FlyBase;Acc:FBgn0010803]
FBgn0010808	10.4879	13.374	7.74293	4.36562	4.93295	13.8795	10.0041	7.61889	12.3984	8.77391	l(3)03670	lethal (3) 03670 [Source:FlyBase;Acc:FBgn0010808]
FBgn0010812	0.806443	0.0342243	0	0	0	0.466499	1.08409	3.47961	0.0371164	0.126455	unc-45	FI21225p1 [Source:UniProtKB/TrEMBL;Acc:Q9VHW4]
FBgn0010825	9.30882	5.38585	16.3891	12.7828	5.26928	10.894	7.84075	25.7688	11.2994	7.01373	Gug	Grunge [Source:FlyBase;Acc:FBgn0010825]
FBgn0010830	1.71317	0.810455	0	0.643664	0.0393702	1.28787	0.430347	0	0.109368	2.06428	l(3)04053	lethal (3) 04053 [Source:FlyBase;Acc:FBgn0010830]
FBgn0010877	3.6103	2.4647	11.6029	7.04966	0.899889	5.08694	2.12195	5.18135	14.3741	2.90952	l(3)05822	lethal (3) 05822 [Source:FlyBase;Acc:FBgn0010877]
FBgn0010894	10.3396	8.71414	8.10891	7.1473	3.46527	5.66534	3.56597	10.0045	2.23468	3.02165	sinu	sinuous [Source:FlyBase;Acc:FBgn0010894]
FBgn0010905	32.9153	33.0004	85.0325	57.4253	28.7214	18.6666	14.9913	35.4054	19.6614	11.2093	Spn	Spinophilin [Source:FlyBase;Acc:FBgn0010905]
FBgn0010909	4.55945	3.23749	13.7147	8.47983	4.3022	7.67886	8.08284	27.1556	7.3331	4.8969	msn	misshapen [Source:FlyBase;Acc:FBgn0010909]
FBgn0010926	0.532659	0.429304	0	2.1729	0.213015	0.130767	0.409653	0	0.403166	0	l(3)07882	lethal (3) 07882 [Source:FlyBase;Acc:FBgn0010926]
FBgn0011016	20.001	12.0165	16.6654	20.9505	9.60048	25.373	21.9897	26.0648	15.2892	27.3828	SsRbeta	Signal sequence receptor beta [Source:FlyBase;Acc:FBgn0011016]
FBgn0011020	0	0	0	0	0.239644	0	0.264548	0	0	0	Sas-4	Spindle assembly abnormal 4 ortholog (C. elegans) [Source:FlyBase;Acc:FBgn0011020]
FBgn0011202	0	0.0533447	0	0	1.2024	0.351134	0.506224	0	1.34909	0.0269355	dia	diaphanous [Source:FlyBase;Acc:FBgn0011202]
FBgn0011204	0.314635	0.536777	0.711669	0.0311071	0.61647	0.956615	0.684981	4.93491	0.706754	0.918065	cue	cueball [Source:FlyBase;Acc:FBgn0011204]
FBgn0011205	2.57406	3.10778	6.82549	3.63166	0.336562	2.21079	0.566665	0	0.040295	1.5176	fbl	fumble [Source:FlyBase;Acc:FBgn0011205]
FBgn0011206	28.8473	24.5913	70.8413	70.9034	23.8765	4.52961	5.39083	8.2427	10.9703	6.61231	bol	boule [Source:FlyBase;Acc:FBgn0011206]
FBgn0011207	6.80931	6.1018	1.6945	1.37024	0.31632	3.59241	1.82496	18.9674	0.540751	2.2314	pelo	pelota [Source:FlyBase;Acc:FBgn0011207]
FBgn0011211	41.1871	35.6649	63.079	58.1419	21.9923	46.6631	36.4187	43.188	45.8892	29.0988	blw	bellwether [Source:FlyBase;Acc:FBgn0011211]
FBgn0011217	101.428	71.4032	122.626	93.5478	45.6425	90.6812	67.8835	61.9522	64.7981	58.2874	eff	effete [Source:FlyBase;Acc:FBgn0011217]
FBgn0011224	1.65713	1.18917	4.19896	1.6407	1.2333	1.12707	2.54511	3.07495	1.01371	0.505528	heph	hephaestus [Source:FlyBase;Acc:FBgn0011224]
FBgn0011225	9.41523	9.63026	17.7937	7.78491	6.10241	9.19362	14.2467	35.6959	10.5705	8.73785	jar	jaguar [Source:FlyBase;Acc:FBgn0011225]
FBgn0011227	583.909	822.317	644.316	485.702	459.65	434.265	360.733	259.175	375.391	306.839	ox	oxen [Source:FlyBase;Acc:FBgn0011227]
FBgn0011230	1.52317	1.59293	3.27742	6.17542	1.95692	3.16077	3.56463	9.05117	2.69471	3.67608	poe	purity of essence [Source:FlyBase;Acc:FBgn0011230]
FBgn0011232	0.802631	0.722917	0.993883	1.88327	0.0660334	0.702638	1.35671	0	1.05869	0.440972	scat	scattered [Source:FlyBase;Acc:FBgn0011232]
FBgn0011236	0.0583862	0	0	0	0	0	0.00704163	0	0	0	ken	ken and barbie [Source:FlyBase;Acc:FBgn0011236]
FBgn0011241	14.2869	11.6171	3.552	0.844524	0	2.47438	3.91262	3.59403	0.631599	5.17692	cbx	crossbronx [Source:FlyBase;Acc:FBgn0011241]
FBgn0011244	0.221268	0.491782	1.3314	0	0	0	0	0	0	0	Hsp60B	Heat shock protein 60 related [Source:FlyBase;Acc:FBgn0011244]
FBgn0011259	60.69	54.4226	192.132	126.365	55.6771	40.7972	43.8959	143.907	49.9243	37.2969	Sema-1a	Sema-1a [Source:FlyBase;Acc:FBgn0011259]
FBgn0011260	9.13654	8.99878	13.5994	7.49576	3.79352	13.0012	6.32915	21.2541	2.99646	3.69216	Sema-2a	Sema-2a [Source:FlyBase;Acc:FBgn0011260]
FBgn0011272	138.648	120.224	102.629	127.41	96.1553	106.3	118.796	133.312	134.38	101.901	RpL13	Ribosomal protein L13 [Source:FlyBase;Acc:FBgn0011272]
FBgn0011274	0	0.0100768	0.0244833	0	0	0.0326926	0.0307808	0	0.0512396	0	Dif	Dorsal-related immunity factor [Source:FlyBase;Acc:FBgn0011274]
FBgn0011282	0.899431	0	0	0	0	0.514383	1.47055	0	0	0	Obp84a	Odorant-binding protein 84a [Source:FlyBase;Acc:FBgn0011282]
FBgn0011284	147.715	180.551	122.006	190.984	153.103	185.171	138.505	126.373	191.461	140.809	RpS4	Ribosomal protein S4 [Source:FlyBase;Acc:FBgn0011284]
FBgn0011286	0.627273	0.63505	3.12128	1.10078	1.01078	0.864062	0.662988	0.635438	0.0814475	0.225098	RyR	Ryanodine receptor [Source:FlyBase;Acc:FBgn0011286]
FBgn0011288	16.8319	21.2803	29.0211	33.7507	21.2337	18.8382	13.2163	62.6447	13.2343	14.9062	Snap25	Synaptosomal-associated protein 25kDa [Source:FlyBase;Acc:FBgn0011288]
FBgn0011289	6.55165	3.74235	6.67668	6.1322	5.50389	6.29574	3.20233	7.89095	1.51439	3.57197	TfIIA-L	Transcription factor IIA L [Source:FlyBase;Acc:FBgn0011289]
FBgn0011290	21.6803	16.8591	30.7871	18.5409	27.2638	17.8022	14.9443	68.5115	28.596	17.4818	Taf12	TBP-associated factor 12 [Source:FlyBase;Acc:FBgn0011290]
FBgn0011291	7.87663	3.79482	0.0929658	0.902105	1.32427	1.10087	3.98794	0	0	2.33543	Taf11	TBP-associated factor 11 [Source:FlyBase;Acc:FBgn0011291]
FBgn0011296	0	0	0	0	0	3.56596	1.09681	0	6.3838	0	l(2)efl	lethal (2) essential for life [Source:FlyBase;Acc:FBgn0011296]
FBgn0011297	0.198102	0	1.18076	0	0	0.039949	1.50178	0	0	0.451998	l(2)not	lethal (2) neighbor of tid [Source:FlyBase;Acc:FBgn0011297]
FBgn0011300	15.5602	13.3688	35.2044	21.5165	15.3805	8.96613	12.4455	28.2959	7.31205	3.85513	babo	baboon [Source:FlyBase;Acc:FBgn0011300]
FBgn0011305	72.8799	74.4342	105.479	92.3973	60.5241	111.531	100.308	143.744	64.7807	99.5756	Rsf1	Repressor splicing factor 1 [Source:FlyBase;Acc:FBgn0011305]
FBgn0011327	2.8013	9.37461	4.18099	11.8565	9.31268	13.808	13.9485	7.65079	2.39313	6.61566	Uch-L5	Ubiquitin carboxy-terminal hydrolase L5 ortholog [Source:FlyBase;Acc:FBgn0011327]
FBgn0011335	0.179171	1.95721	0.81551	1.19329	4.59827	1.70147	0.990079	0	1.39949	1.17067	l(3)j2D3	lethal (3) j2D3 [Source:FlyBase;Acc:FBgn0011335]
FBgn0011336	1.52693	2.68275	4.30052	4.96562	3.97119	5.61361	5.59345	21.5375	2.26147	4.67314	OstStt3	Oligosaccharyl transferase 3 [Source:FlyBase;Acc:FBgn0011336]
FBgn0011361	111.742	91.5247	43.5182	60.8201	59.6192	94.139	74.6526	72.831	69.5558	49.2417	mtacp1	mitochondrial acyl carrier protein 1 [Source:FlyBase;Acc:FBgn0011361]
FBgn0011455	69.7792	65.9535	60.8032	73.2393	32.9871	66.0008	52.63	29.7476	78.3216	56.8819	l(3)neo18	lethal (3) neo18 [Source:FlyBase;Acc:FBgn0011455]
FBgn0011474	1.80986	2.06087	9.07416	7.67413	2.96266	3.21926	3.20603	5.40479	5.0638	2.96339	pr-set7	pr-set7 [Source:FlyBase;Acc:FBgn0011474]
FBgn0011476	17.6612	39.7284	16.7497	28.0293	14.4979	31.4044	23.2537	0	25.9729	20.6492	l(3)neo43	lethal (3) neo43 [Source:FlyBase;Acc:FBgn0011476]
FBgn0011481	10.4743	8.24086	19.1002	12.9722	6.0495	12.169	11.8812	36.6793	20.9432	11.2579	Ssdp	Sequence-specific single-stranded DNA-binding protein [Source:FlyBase;Acc:FBgn0011481]
FBgn0011509	10.6164	5.47997	0.498616	3.22559	3.05808	7.80696	6.34496	0	4.73693	1.36857	SrpRbeta	Signal recognition particle receptor beta [Source:FlyBase;Acc:FBgn0011509]
FBgn0011559	0	0	0	0	0	0.313709	0.941914	0.437746	0	0.348604	Acp36DE	Accessory gland protein 36DE [Source:FlyBase;Acc:FBgn0011559]
FBgn0011566	2.07848	2.03942	2.56298	3.01696	1.35753	0.614681	1.74157	0.545822	4.28695	0.958374	Bzd	Buzidau [Source:FlyBase;Acc:FBgn0011566]
FBgn0011569	0	0	0	0.322943	0	0	0.0955021	0	0	0	can	cannonball [Source:FlyBase;Acc:FBgn0011569]
FBgn0011570	8.15929	6.06166	0.914418	2.43149	1.8533	7.21076	3.86531	3.56625	6.8783	2.30702	cpb	capping protein beta [Source:FlyBase;Acc:FBgn0011570]
FBgn0011571	0.780319	0.283139	3.62284	0.48826	2.07038	1.15444	0.686914	0	0.101123	0.681675	caz	cabeza [Source:FlyBase;Acc:FBgn0011571]
FBgn0011573	1.0536	5.91756	6.67107	2.79713	2.34636	6.48551	4.36618	6.66829	2.38607	2.03449	Cdc37	Cdc37 [Source:FlyBase;Acc:FBgn0011573]
FBgn0011576	0.139007	0.217644	0	1.42297	0.0447198	2.557	0.566888	0	0	2.66869	Cyp4d2	Cytochrome P450-4d2 [Source:FlyBase;Acc:FBgn0011576]
FBgn0011581	0	0	2.0856	0	0	1.13972	1.02487	0	5.69587	0	Ms	Myosuppressin [Source:FlyBase;Acc:FBgn0011581]
FBgn0011582	1.0556	1.95213	8.77201	6.32198	6.0188	0.515691	0.676692	2.04974	0.869798	0.225748	Dop1R1	Dopamine 1-like receptor 1 [Source:FlyBase;Acc:FBgn0011582]
FBgn0011584	16.1603	17.4744	26.0462	30.2557	13.3341	16.4409	15.6726	22.6459	10.0545	10.1132	Trp1	Translocation protein 1 [Source:FlyBase;Acc:FBgn0011584]
FBgn0011586	49.8752	60.7031	30.1934	35.7178	52.4332	38.313	33.024	32.9022	101.746	29.8981	e(r)	enhancer of rudimentary [Source:FlyBase;Acc:FBgn0011586]
FBgn0011589	0	0.0911455	1.01318	0.0160862	0.177106	0.164896	0.578336	2.61775	0.0913696	0	Elk	Eag-like K[+] channel [Source:FlyBase;Acc:FBgn0011589]
FBgn0011592	4.07379	4.47634	11.7516	4.45818	3.56266	8.28032	6.80426	17.6282	7.2791	4.62031	fra	frazzled [Source:FlyBase;Acc:FBgn0011592]
FBgn0011596	0	0	0	0.315021	0	0	0	0	0.43721	0.0671626	fzo	fuzzy onions [Source:FlyBase;Acc:FBgn0011596]
FBgn0011604	3.64613	1.83836	4.95034	5.5343	3.87626	3.08992	3.87485	4.0451	5.81208	3.52102	Iswi	Imitation SWI [Source:FlyBase;Acc:FBgn0011604]
FBgn0011606	0	0	0.702871	0.382356	0	0.611421	0.0325038	0	0.121617	0.08561	Klp3A	Kinesin-like protein at 3A [Source:FlyBase;Acc:FBgn0011606]
FBgn0011638	4.90955	7.76932	3.92687	8.70185	0.403393	3.57697	5.91349	0.476439	0	1.35958	La	La autoantigen-like [Source:FlyBase;Acc:FBgn0011638]
FBgn0011640	11.8031	15.4182	15.2886	19.0835	15.0593	25.1426	18.0211	32.0836	9.35907	17.9096	lark	lark [Source:FlyBase;Acc:FBgn0011640]
FBgn0011642	37.3221	22.1702	17.8822	29.3742	21.5487	38.4797	34.0796	54.7804	28.6115	12.9739	Zyx	Zyxin [Source:FlyBase;Acc:FBgn0011642]
FBgn0011648	6.24992	4.90129	8.67645	3.84106	0.744307	6.21534	3.7238	13.91	3.3426	2.81527	Mad	Mothers against dpp [Source:FlyBase;Acc:FBgn0011648]
FBgn0011655	3.28511	2.46277	9.45521	9.51285	3.05646	2.85504	3.88322	3.34313	4.8739	3.16172	Med	Medea [Source:FlyBase;Acc:FBgn0011655]
FBgn0011656	0.355524	0.350574	0.965551	0.508707	0.751683	0.602236	0.036972	0	0	0.117334	Mef2	Myocyte enhancer factor 2 [Source:FlyBase;Acc:FBgn0011656]
FBgn0011659	0	0	0	0	0.0960781	0	0	0	0	0.0564812	Mlh1	Mlh1 [Source:FlyBase;Acc:FBgn0011659]
FBgn0011660	0.268896	0.531817	0	0.0585815	0.101633	0.545272	0.892264	0	0	0.0158704	Pms2	Pms2 [Source:FlyBase;Acc:FBgn0011660]
FBgn0011661	4.20337	8.19378	7.22411	8.05908	3.95855	10.2134	7.94351	15.792	10.0671	8.24785	Moe	Moesin [Source:FlyBase;Acc:FBgn0011661]
FBgn0011666	6.14694	1.5934	11.7973	4.80555	2.48738	67.3142	61.9132	177.847	77.8716	47.5349	msi	musashi [Source:FlyBase;Acc:FBgn0011666]
FBgn0011672	3.95794	0.49328	0.598893	1.81622	0.94478	1.25402	0.578416	0.987628	0.261627	0.0364717	Mvl	Malvolio [Source:FlyBase;Acc:FBgn0011672]
FBgn0011674	0	0	0	0	0	0.191729	0.0709834	0	0	0.0112984	insc	inscuteable [Source:FlyBase;Acc:FBgn0011674]
FBgn0011676	0.0231487	0.174709	0.011038	0.142811	0	0.0130708	0.107206	0	0	0	Nos	Nitric oxide synthase [Source:FlyBase;Acc:FBgn0011676]
FBgn0011692	0	0	0	0	0.0886428	0	0.0067155	0	0	0	pav	pavarotti [Source:FlyBase;Acc:FBgn0011692]
FBgn0011693	0	3.03203	0	0.836893	0	0.0875388	0.508577	0	0	0	Pdh	Photoreceptor dehydrogenase [Source:FlyBase;Acc:FBgn0011693]
FBgn0011695	6.53698	1.03138	0	0	4.01996	1.89728	0	0	6.89589	1.09772	PebIII	Ejaculatory bulb protein III [Source:FlyBase;Acc:FBgn0011695]
FBgn0011701	0	0.0172666	0.0583345	0	0.0954515	0.203928	0.017118	0.526101	0	0.00833524	repo	reversed polarity [Source:FlyBase;Acc:FBgn0011701]
FBgn0011704	0	0	0	0	0	0	0.0295602	0	0	0.259955	RnrS	Ribonucleoside diphosphate reductase small subunit [Source:FlyBase;Acc:FBgn0011704]
FBgn0011705	0	0	0	0.882131	0	0	0.0527842	0	0	0	rost	rolling stone [Source:FlyBase;Acc:FBgn0011705]
FBgn0011708	4.97958	5.04147	0	8.82943	1.23709	4.84353	4.4893	0	2.64878	7.00844	Syx5	Syntaxin 5 [Source:FlyBase;Acc:FBgn0011708]
FBgn0011710	2.24769	0.241619	0	4.04298	0.049185	7.22892	3.19709	0	0.273266	0.821145	2018-09-01	Septin 1 [Source:FlyBase;Acc:FBgn0011710]
FBgn0011715	14.465	8.62254	5.19787	8.77185	1.04625	5.45933	9.60297	17.3949	13.9572	10.5219	Snr1	Snf5-related 1 [Source:FlyBase;Acc:FBgn0011715]
FBgn0011722	0	0	0	0.0831881	0	0.0783132	0.041632	0	0.102483	0	Tig	Tiggrin [Source:FlyBase;Acc:FBgn0011722]
FBgn0011725	6.54126	8.07232	10.1061	12.9627	10.0303	7.3873	8.36188	1.0326	7.04046	6.91049	twin	twin [Source:FlyBase;Acc:FBgn0011725]
FBgn0011726	140.772	223.429	71.3059	68.4412	42.8017	105.009	220.389	134.452	70.798	105.296	tsr	twinstar [Source:FlyBase;Acc:FBgn0011726]
FBgn0011737	3.9272	5.24526	12.8357	0.398523	1.95733	5.24878	3.72781	10.4433	1.55009	0.386781	Wee1	Wee1 ortholog (S. pombe) [Source:FlyBase;Acc:FBgn0011737]
FBgn0011739	1.60532	1.80012	1.48477	1.8224	2.62803	1.85241	1.21962	7.76909	0.380951	1.79467	wts	warts [Source:FlyBase;Acc:FBgn0011739]
FBgn0011740	0.741033	1.49814	0.274819	0.613771	0.104858	0.681844	2.11844	1.67878	3.94862	2.26842	alpha-Man-II	alpha Mannosidase II [Source:FlyBase;Acc:FBgn0011740]
FBgn0011741	1.12505	2.79311	0.0447049	2.78355	0.278603	5.61141	3.90776	0	7.70784	2.28353	Arp6	Actin-related protein 6 [Source:FlyBase;Acc:FBgn0011741]
FBgn0011742	11.384	6.6432	6.791	4.11799	3.1075	2.48008	7.36479	14.6979	7.41964	5.10661	Arp2	Actin-related protein 2 [Source:FlyBase;Acc:FBgn0011742]
FBgn0011745	13.9562	14.1774	12.2312	8.06613	9.52823	9.90997	14.8455	32.407	5.68611	12.6174	Arp1	Actin-related protein 1 [Source:FlyBase;Acc:FBgn0011745]
FBgn0011747	8.94668	4.44519	8.93824	6.57353	2.84085	6.45967	5.51726	14.8673	7.17903	5.12287	Ank	Ankyrin [Source:FlyBase;Acc:FBgn0011747]
FBgn0011754	6.01565	2.50543	1.98533	8.84727	2.66657	2.91399	4.60897	8.48525	0.244879	3.11841	PhKgamma	Phosphorylase kinase gamma [Source:FlyBase;Acc:FBgn0011754]
FBgn0011760	57.5459	53.3595	106.078	97.3034	47.5695	72.5429	75.0276	125.755	89.4736	68.7669	ctp	cut up [Source:FlyBase;Acc:FBgn0011760]
FBgn0011761	0	0	0	0.169385	0.41779	5.94335	0.08477	0	7.95839	0	dhd	deadhead [Source:FlyBase;Acc:FBgn0011761]
FBgn0011762	0	0.0464672	0.594981	0	0	0.0440347	0	0	0	0	DNApol-alpha50	DNA polymerase alpha 50kD [Source:FlyBase;Acc:FBgn0011762]
FBgn0011763	4.10342	1.41635	7.09075	9.10871	3.05051	4.68881	5.02126	9.79685	7.73913	1.66028	Dp	DP transcription factor [Source:FlyBase;Acc:FBgn0011763]
FBgn0011766	4.93384	4.11488	10.5251	6.23134	7.37642	9.83832	6.5936	24.459	13.6734	7.07548	E2f1	E2F transcription factor 1 [Source:FlyBase;Acc:FBgn0011766]
FBgn0011768	9.49944	0.620133	1.17301	4.81565	0.562328	7.96024	14.4236	17.4578	5.19642	8.06581	Fdh	Formaldehyde dehydrogenase [Source:FlyBase;Acc:FBgn0011768]
FBgn0011769	13.362	20.0329	23.3527	5.44901	8.18206	17.8561	14.3092	8.6393	14.391	7.81109	Fdxh	Ferredoxin [Source:FlyBase;Acc:FBgn0011769]
FBgn0011770	2.86197	1.51142	0	1.29652	3.92108	4.20186	3.13623	14.6594	4.60497	4.05807	Gip	GIP-like [Source:FlyBase;Acc:FBgn0011770]
FBgn0011771	4.25424	2.03413	3.08874	6.7167	1.13959	5.058	6.19919	3.33562	3.56881	6.38456	Hem	HEM-protein [Source:FlyBase;Acc:FBgn0011771]
FBgn0011774	0.0343331	0	0	0	0	0	0.132503	0	0	0	Irbp	Inverted repeat-binding protein [Source:FlyBase;Acc:FBgn0011774]
FBgn0011785	1.52839	0.740894	3.00232	1.7844	1.3446	1.44447	1.10858	5.45138	2.03262	1.29046	BRWD3	BRWD3 [Source:FlyBase;Acc:FBgn0011785]
FBgn0011787	19.0306	15.5955	32.4228	13.312	4.64713	12.9565	12.3493	58.4751	2.12793	6.68247	mRpL12	mitochondrial ribosomal protein L12 [Source:FlyBase;Acc:FBgn0011787]
FBgn0011802	0.0324329	0.270546	0	0.650289	0.564505	0	0.187755	0	0	0.679879	Gem3	Gemin3 [Source:FlyBase;Acc:FBgn0011802]
FBgn0011817	30.5503	26.3774	87.3422	52.5306	28.4996	74.8959	41.0671	108.606	55.5817	33.2087	nmo	nemo [Source:FlyBase;Acc:FBgn0011817]
FBgn0011818	95.1193	77.6918	192.63	139.178	72.3384	29.8642	25.6078	31.8382	25.6715	22.1826	oaf	out at first [Source:FlyBase;Acc:FBgn0011818]
FBgn0011824	0.0872391	0	1.45594	0	0.246898	0	0.0280571	0	0	0	CG4038	Probable H/ACA ribonucleoprotein complex subunit 1 [Source:UniProtKB/Swiss-Prot;Acc:Q7KVQ0]
FBgn0011826	4.28635	8.07555	4.21142	9.59469	9.10464	9.20829	4.49808	14.5497	6.46472	6.2041	Pp2B-14D	Protein phosphatase 2B at 14D [Source:FlyBase;Acc:FBgn0011826]
FBgn0011828	17.9468	16.5716	32.4674	34.5537	13.3711	65.0894	39.2888	117.296	70.017	49.5244	Pxn	Peroxidasin [Source:FlyBase;Acc:FBgn0011828]
FBgn0011829	0	0	0	0	0	0.0595856	1.81487	1.97933	0.774705	1.90565	Ret	Ret oncogene [Source:FlyBase;Acc:FBgn0011829]
FBgn0011836	0.667455	0.266263	0	1.07783	0.363266	0.434855	0.727754	3.57539	0.701587	0.814326	Taf2	TBP-associated factor 2 [Source:FlyBase;Acc:FBgn0011836]
FBgn0011837	0.483393	0.437955	1.83557	0.0500327	0.975495	1.50721	0.515762	0.26024	1.25133	0.575863	Tis11	Tis11 homolog [Source:FlyBase;Acc:FBgn0011837]
FBgn0012034	5.08005	5.47768	8.88146	13.019	7.74018	7.05272	3.04114	15.3414	4.94294	5.57308	AcCoAS	Acetyl Coenzyme A synthase [Source:FlyBase;Acc:FBgn0012034]
FBgn0012036	0.349168	0.408664	0	0.841455	0	2.32362	1.13099	5.21528	2.87819	1.48132	Aldh	Aldehyde dehydrogenase [Source:FlyBase;Acc:FBgn0012036]
FBgn0012051	1.95746	0.842538	1.1944	0.15578	1.49214	3.21654	2.43559	9.15606	0.14974	0.596872	CalpA	Calpain-A [Source:FlyBase;Acc:FBgn0012051]
FBgn0012058	2.31204	1.22178	5.76731	1.9938	2.889	3.12107	1.87519	6.70509	0.821072	0.889351	Cdc27	Cell division cycle 27 ortholog [Source:FlyBase;Acc:FBgn0012058]
FBgn0012344	0	0	0.0422063	1.77474	0	0	0.00935678	0	0	0	Dh44	Diuretic hormone 44 [Source:FlyBase;Acc:FBgn0012344]
FBgn0013263	2.77591	3.57208	7.36413	5.19227	2.53528	5.3638	3.73235	2.06831	3.0467	4.13002	Trl	Trithorax-like [Source:FlyBase;Acc:FBgn0013263]
FBgn0013269	0.313728	4.92641	2.66466	3.28882	0.12486	1.55002	1.85401	17.4997	0	1.97688	FK506-bp1	FK506-binding protein 1 [Source:FlyBase;Acc:FBgn0013269]
FBgn0013275	58.7349	48.2686	87.1286	43.9868	14.5908	64.5783	41.9735	133.373	29.3298	17.6775	Hsp70Aa	Heat-shock-protein-70Aa [Source:FlyBase;Acc:FBgn0013275]
FBgn0013276	16.6306	24.9552	24.7478	38.0498	43.7704	55.8642	40.0902	20.8029	28.2952	29.3115	Hsp70Ab	Heat-shock-protein-70Ab [Source:FlyBase;Acc:FBgn0013276]
FBgn0013277	2.0944	2.1897	1.25752	2.65342	2.58819	3.61347	1.68557	4.20556	1.02858	0.397282	Hsp70Ba	Heat-shock-protein-70Ba [Source:FlyBase;Acc:FBgn0013277]
FBgn0013278	47.0095	59.8415	61.5375	43.568	29.9507	112.892	78.7442	138.569	79.9536	64.9977	Hsp70Bb	Heat-shock-protein-70Bb [Source:FlyBase;Acc:FBgn0013278]
FBgn0013279	10.796	13.3649	14.1191	14.8558	10.7002	14.9435	4.68903	15.5495	4.70274	3.17048	Hsp70Bc	Heat-shock-protein-70Bc [Source:FlyBase;Acc:FBgn0013279]
FBgn0013303	114.415	118.049	31.0595	21.9079	22.9209	127.289	70.8137	31.9476	26.8862	32.7602	Nca	Neurocalcin [Source:FlyBase;Acc:FBgn0013303]
FBgn0013305	35.1965	28.7442	25.9073	14.3789	16.037	15.2564	13.5189	1.86602	13.1802	15.0469	Nmda1	N-methyl-D-aspartate receptor-associated protein [Source:FlyBase;Acc:FBgn0013305]
FBgn0013307	0	0	0	0	0	0	0.118712	0	0	0.0204699	Odc1	Ornithine decarboxylase 1 [Source:FlyBase;Acc:FBgn0013307]
FBgn0013325	189.45	194.877	122.875	163.334	217.746	196.316	185.717	191.902	206.983	186.214	RpL11	Ribosomal protein L11 [Source:FlyBase;Acc:FBgn0013325]
FBgn0013334	33.9938	22.1279	63.2644	62.9704	36.6285	26.0088	15.6365	37.7436	20.4206	13.3607	Sap47	Synapse-associated protein 47kD [Source:FlyBase;Acc:FBgn0013334]
FBgn0013342	45.629	43.2984	106.275	87.7147	62.8217	60.7973	46.9932	133.915	62.1515	39.0693	nSyb	neuronal Synaptobrevin [Source:FlyBase;Acc:FBgn0013342]
FBgn0013343	52.3096	37.6463	139.126	84.6628	35.374	39.8372	31.545	97.4291	42.5771	39.7662	Syx1A	Syntaxin 1A [Source:FlyBase;Acc:FBgn0013343]
FBgn0013347	46.212	43.6135	125.249	36.5647	20.6629	62.0745	49.1213	60.3102	55.2326	49.3131	TfIIA-S	Transcription-factor-IIA-S [Source:FlyBase;Acc:FBgn0013347]
FBgn0013432	21.3311	12.8246	5.41027	6.9999	0.437885	3.37247	9.02262	4.13742	3.05842	7.86651	bcn92	bcn92 [Source:FlyBase;Acc:FBgn0013432]
FBgn0013433	0	0	0	0	0.0168664	0.0448674	1.46434	3.30682	1.24498	0.388667	beat-Ia	beaten path Ia [Source:FlyBase;Acc:FBgn0013433]
FBgn0013435	7.17102	0.918215	0	0.11884	1.13396	1.7983	2.12125	0	3.6693	0.348683	cdc2rk	cdc2-related-kinase [Source:FlyBase;Acc:FBgn0013435]
FBgn0013467	81.2607	77.1654	98.1684	82.814	71.2794	70.0319	47.894	44.8537	86.5544	43.8981	igl	igloo [Source:FlyBase;Acc:FBgn0013467]
FBgn0013531	0.836078	0.363246	0	0.906684	0	0.516346	0.529382	0	0.308118	0.104324	MED20	Mediator complex subunit 20 [Source:FlyBase;Acc:FBgn0013531]
FBgn0013548	0	0.21262	0	0.61091	0.34539	1.06387	0.32226	0	0.995543	0.50439	l(2)dtl	lethal-(2)-denticleless [Source:FlyBase;Acc:FBgn0013548]
FBgn0013563	0	0.486478	0	0	0	0	0.420134	0	0	0.0135835	Pex1	Peroxin 1 [Source:FlyBase;Acc:FBgn0013563]
FBgn0013576	6.41044	5.29062	11.6682	16.2556	6.70475	5.17669	7.94186	22.5858	2.11434	3.56085	mtd	mustard [Source:FlyBase;Acc:FBgn0013576]
FBgn0013672	2268	2184.76	620.644	1026.8	1050.15	2143.03	1523.19	654.184	733.428	852.297	mt:ATPase6	mitochondrial ATPase subunit 6 [Source:FlyBase;Acc:FBgn0013672]
FBgn0013673	7334.81	7280.94	1081.32	2408.93	1000.94	6843.25	5314.91	2048.14	1629.38	2341.64	mt:ATPase8	mitochondrial ATPase subunit 8 [Source:FlyBase;Acc:FBgn0013673]
FBgn0013674	1529.28	1350.66	502.826	708.581	310.385	1189.59	878.647	494.904	605.512	489.939	mt:CoI	mitochondrial Cytochrome c oxidase subunit I [Source:FlyBase;Acc:FBgn0013674]
FBgn0013675	2673.86	2237.5	434.135	719.645	579.812	1879.71	1516.38	759.923	709.818	885.372	mt:CoII	mitochondrial Cytochrome c oxidase subunit II [Source:FlyBase;Acc:FBgn0013675]
FBgn0013676	1558.29	1319.02	300.322	434.418	228.44	1208.07	939.173	375.134	466.424	393.599	mt:CoIII	mitochondrial Cytochrome c oxidase subunit III [Source:FlyBase;Acc:FBgn0013676]
FBgn0013678	353.801	350.841	52.1227	87.0202	52.1559	266.11	241.032	101.719	88.9567	74.5088	mt:Cyt-b	mitochondrial Cytochrome b [Source:FlyBase;Acc:FBgn0013678]
FBgn0013679	29.331	27.1423	8.32327	13.5185	6.5868	14.0681	15.0567	17.0552	3.71987	3.45508	mt:ND1	mitochondrial NADH-ubiquinone oxidoreductase chain 1 [Source:FlyBase;Acc:FBgn0013679]
FBgn0013680	3.54608	4.02079	1.82968	1.02038	3.37025	1.79308	2.60434	0.265369	0.624157	0.766068	mt:ND2	mitochondrial NADH-ubiquinone oxidoreductase chain 2 [Source:FlyBase;Acc:FBgn0013680]
FBgn0013681	10.0999	24.3029	6.0199	6.36572	11.9557	7.12854	14.2422	0.973842	6.2171	8.53081	mt:ND3	mitochondrial NADH-ubiquinone oxidoreductase chain 3 [Source:FlyBase;Acc:FBgn0013681]
FBgn0013683	0	0	4.39808	7.11289	0	2.60402	0.444961	18.4985	0	0.460357	mt:ND4L	mitochondrial NADH-ubiquinone oxidoreductase chain 4L [Source:FlyBase;Acc:FBgn0013683]
FBgn0013684	3.11351	5.87741	0.769058	3.89356	3.15551	5.26616	4.81726	1.19543	4.13483	3.05196	mt:ND5	mitochondrial NADH-ubiquinone oxidoreductase chain 5 [Source:FlyBase;Acc:FBgn0013684]
FBgn0013685	1.93249	2.21432	0.531617	2.00613	2.36647	0.629521	0.932266	0	0.626088	0.37097	mt:ND6	mitochondrial NADH-ubiquinone oxidoreductase chain 6 [Source:FlyBase;Acc:FBgn0013685]
FBgn0013717	2.99769	2.41073	2.43347	3.47466	1.73711	2.98547	5.83779	2.02861	1.4407	4.34166	not	non-stop [Source:FlyBase;Acc:FBgn0013717]
FBgn0013718	9.8158	5.75863	11.2315	9.64317	3.45869	2.52524	2.1251	0	0.538896	0.813799	nuf	nuclear fallout [Source:FlyBase;Acc:FBgn0013718]
FBgn0013720	17.421	22.038	31.1035	13.7398	5.58867	20.9588	12.5681	7.54362	11.7063	6.71885	pck	pickel [Source:FlyBase;Acc:FBgn0013720]
FBgn0013725	4.59679	7.53529	17.9364	10.3101	11.3238	6.14159	7.7084	17.2048	6.63166	2.26199	phyl	phyllopod [Source:FlyBase;Acc:FBgn0013725]
FBgn0013726	100.458	72.7419	111.874	91.6401	77.3721	55.4259	31.5606	43.435	44.02	46.7094	pnut	peanut [Source:FlyBase;Acc:FBgn0013726]
FBgn0013732	1.23531	0.610016	4.20047	5.79122	0	3.14451	3.53652	5.27989	2.52464	2.74248	sced	scrambled [Source:FlyBase;Acc:FBgn0013732]
FBgn0013733	2.27121	2.32028	7.77055	5.75194	2.18675	3.00692	3.67642	6.39128	2.55376	2.05122	shot	short stop [Source:FlyBase;Acc:FBgn0013733]
FBgn0013746	0.019873	5.65136	5.28149	6.56554	3.26281	7.08434	7.02455	0.409962	4.28193	4.26053	alien	alien [Source:FlyBase;Acc:FBgn0013746]
FBgn0013749	86.085	93.4655	36.5266	43.9243	28.3264	100.512	93.2654	48.4228	60.3479	34.7495	Arf102F	ADP ribosylation factor at 102F [Source:FlyBase;Acc:FBgn0013749]
FBgn0013750	22.6732	21.999	27.3575	9.49816	13.7125	31.383	32.6782	82.9755	20.0878	18.122	Arf51F	ADP ribosylation factor at 51F [Source:FlyBase;Acc:FBgn0013750]
FBgn0013751	0	0	0	0	0	0.681922	0	0	0.232527	0	Awh	Arrowhead [Source:FlyBase;Acc:FBgn0013751]
FBgn0013753	21.4178	19.4161	11.7154	16.6685	1.76036	23.063	24.8256	37.4242	14.0418	9.39628	Bgb	Big brother [Source:FlyBase;Acc:FBgn0013753]
FBgn0013755	4.32565	3.46955	11.1063	5.21216	4.06109	5.51901	6.86226	11.2613	9.88006	10.6288	Bro	Brother [Source:FlyBase;Acc:FBgn0013755]
FBgn0013756	0.61511	0.643373	2.01402	1.21034	0.684741	2.00673	0.986496	9.84173	0.579537	0.796855	Mtor	Megator [Source:FlyBase;Acc:FBgn0013756]
FBgn0013759	13.298	12.4957	35.6483	25.9884	9.69484	23.9221	36.2235	80.7621	32.628	29.1633	CASK	CASK ortholog [Source:FlyBase;Acc:FBgn0013759]
FBgn0013762	0.638165	10.3812	2.82561	3.72027	3.77343	1.07243	2.6828	0	1.17751	1.09205	Cdk5	Cyclin-dependent kinase 5 [Source:FlyBase;Acc:FBgn0013762]
FBgn0013763	0	0	0	0	0.167865	0	0.0127173	0	0	0	CG5210	CG5210, isoform B [Source:UniProtKB/TrEMBL;Acc:A0A0B4LFJ1]
FBgn0013764	3.83096	3.67131	0.497139	4.97216	5.35778	5.0902	4.26039	12.656	4.23397	1.99383	Chi	Chip [Source:FlyBase;Acc:FBgn0013764]
FBgn0013765	3.99336	7.46366	5.00385	5.46544	2.83876	6.47464	7.18865	2.31391	7.32262	4.69136	cnn	centrosomin [Source:FlyBase;Acc:FBgn0013765]
FBgn0013770	7.4461	5.60017	0.219134	7.64791	2.76678	7.57407	10.6509	0	19.1738	5.74257	Cp1	Cysteine proteinase-1 [Source:FlyBase;Acc:FBgn0013770]
FBgn0013799	3.40392	3.61849	13.5247	5.13544	7.36194	5.77043	4.82208	22.3867	5.02776	4.42903	Deaf1	Deformed epidermal autoregulatory factor-1 [Source:FlyBase;Acc:FBgn0013799]
FBgn0013811	0.0678109	0	0.161671	0	0	0	0.0671039	0	0	0.0347129	Dhc62B	Dynein heavy chain at 62B [Source:FlyBase;Acc:FBgn0013811]
FBgn0013954	405.174	446.182	308.705	231.954	179.925	293.656	444.777	479.314	390.661	347.079	FK506-bp2	FK506-binding protein 2 [Source:FlyBase;Acc:FBgn0013954]
FBgn0013972	0.215176	0.116554	0	0.0377127	0.830421	0.524651	1.30228	0	3.98757	0.507692	Gycalpha99B	Guanylyl cyclase alpha-subunit at 99B [Source:FlyBase;Acc:FBgn0013972]
FBgn0013973	0	0	0	0	0	0.106597	0.0832672	0	0	0	Gycbeta100B	Guanylyl cyclase beta-subunit at 100B [Source:FlyBase;Acc:FBgn0013973]
FBgn0013981	2341.8	2500	1492.7	1839.04	1299.22	2575.15	2130.37	1525.35	1848.74	1696.98	His4r	Histone H4 replacement [Source:FlyBase;Acc:FBgn0013981]
FBgn0013983	2.51828	0.0954509	0	3.40964	1.46894	1.03118	1.46526	0	0	3.30056	imd	immune deficiency [Source:FlyBase;Acc:FBgn0013983]
FBgn0013987	7.201	3.99416	2.74338	1.50363	2.65252	2.96916	3.06391	10.6703	2.06644	3.93389	MAPk-Ak2	MAP kinase activated protein-kinase-2 [Source:FlyBase;Acc:FBgn0013987]
FBgn0013995	0.0314701	0.0122429	0.433503	0.289875	1.09104	3.72495	1.65596	2.74176	3.09233	1.7031	Calx	Na/Ca-exchange protein [Source:FlyBase;Acc:FBgn0013995]
FBgn0013997	2.40952	2.72405	2.12416	2.81766	3.09288	5.0431	10.7686	17.3625	10.7065	7.37778	Nrx-IV	Neurexin IV [Source:FlyBase;Acc:FBgn0013997]
FBgn0014002	28.3582	36.6961	29.1939	36.4409	17.7811	29.2692	33.7511	51.4733	45.4641	31.5741	Pdi	Protein disulfide isomerase [Source:FlyBase;Acc:FBgn0014002]
FBgn0014006	0.322064	0.451524	1.56958	1.21443	1.2868	0.213943	1.42117	1.18735	0.422894	0.359313	Pk92B	Protein kinase at 92B [Source:FlyBase;Acc:FBgn0014006]
FBgn0014007	3.76694	3.53336	7.00803	0.783035	2.57744	5.96976	3.89831	3.58999	1.29092	0.936269	Ptp69D	Protein tyrosine phosphatase 69D [Source:FlyBase;Acc:FBgn0014007]
FBgn0014009	39.629	40.4276	58.7508	30.6038	30.737	41.34	33.6731	68.6137	41.3078	22.0549	Rab2	Rab2 [Source:FlyBase;Acc:FBgn0014009]
FBgn0014010	37.7357	32.5613	52.2737	39.802	19.4848	42.5152	27.9517	80.5108	40.476	27.785	Rab5	Rab5 [Source:FlyBase;Acc:FBgn0014010]
FBgn0014018	1.54018	0	0	0.192605	0.424109	1.19871	0.441789	0	3.09966	1.2715	Rel	Relish [Source:FlyBase;Acc:FBgn0014018]
FBgn0014020	23.7952	33.159	29.7198	31.6579	6.7008	39.7016	32.6428	33.5336	30.636	34.7263	Rho1	Rho1 [Source:FlyBase;Acc:FBgn0014020]
FBgn0014022	1.2577	1.31741	0	4.98234	0.0731396	1.89699	0.980755	21.5095	1.68347	2.49373	Rlb1	Rlb1 [Source:FlyBase;Acc:FBgn0014022]
FBgn0014023	6.71634	2.71153	4.19026	6.17172	0.0666172	6.64548	12.1125	0	6.292	3.54017	mRpL47	mitochondrial ribosomal protein L47 [Source:FlyBase;Acc:FBgn0014023]
FBgn0014024	1.61408	0.748791	3.15027	1.05219	0.673177	2.41078	1.24248	8.71339	0.653299	1.93742	Rnp4F	RNA-binding protein 4F [Source:FlyBase;Acc:FBgn0014024]
FBgn0014026	89.2542	79.6019	50.9216	69.8744	65.5514	69.1552	83.227	96.0798	56.7357	41.7265	RpL7A	Ribosomal protein L7A [Source:FlyBase;Acc:FBgn0014026]
FBgn0014028	12.514	16.5851	28.4981	23.8033	12.2281	23.8874	9.91025	29.1594	9.06463	13.242	SdhB	Succinate dehydrogenase B [Source:FlyBase;Acc:FBgn0014028]
FBgn0014029	13.9713	13.9446	2.87861	7.79947	6.9562	13.736	13.9767	6.68273	10.5667	5.76013	2018-09-02	Septin 2 [Source:FlyBase;Acc:FBgn0014029]
FBgn0014031	0	0.140883	0	0.478636	0	0	0	0	0	0	Spat	Serine pyruvate aminotransferase [Source:FlyBase;Acc:FBgn0014031]
FBgn0014032	0.161207	0.0921263	0.109812	2.55835	0.342177	0.0650176	0.0444395	0	0.0775958	0.689656	Sptr	Sepiapterin reductase [Source:FlyBase;Acc:FBgn0014032]
FBgn0014033	0	0	0	0	0	0	0.076994	0	0	0.0113797	Sr-CI	Scavenger receptor class C, type I [Source:FlyBase;Acc:FBgn0014033]
FBgn0014037	3.74718	3.76036	14.3841	12.7925	8.31909	8.06843	4.91688	20.5282	4.71344	3.58124	Su(Tpl)	Su(Tpl) [Source:FlyBase;Acc:FBgn0014037]
FBgn0014075	0.641991	1.8077	1.34655	4.7158	0.793464	1.00949	2.36397	7.72126	0	2.23486	Ugt	UDP-glucose-glycoprotein glucosyltransferase [Source:FlyBase;Acc:FBgn0014075]
FBgn0014076	0	1.19628	8.63912	3.81049	0	2.79004	1.58929	0	0	0	Vm32E	Vitelline membrane 32E [Source:FlyBase;Acc:FBgn0014076]
FBgn0014092	0.332606	3.05254	2.61231	1.13659	0.112161	2.02418	10.9056	0	0.383498	0.229078	CG4278	NIF3-like protein 1 [Source:UniProtKB/Swiss-Prot;Acc:Q9NK57]
FBgn0014127	0.684871	0.261435	1.30559	3.51065	0.24372	1.64578	0.630617	0.309996	0	1.04919	barr	barren [Source:FlyBase;Acc:FBgn0014127]
FBgn0014133	5.46648	3.67042	16.5267	5.34729	6.14786	6.91482	5.76232	15.6619	2.64484	3.48855	bif	bifocal [Source:FlyBase;Acc:FBgn0014133]
FBgn0014135	0.225176	0	0	0	0	0	0.0117437	0	0	0	bnl	branchless [Source:FlyBase;Acc:FBgn0014135]
FBgn0014163	241.808	209.375	611.913	490.17	316.818	347.53	253.048	617.199	327.982	255.375	fax	failed axon connections [Source:FlyBase;Acc:FBgn0014163]
FBgn0014184	192.126	240.288	189.066	200.21	134.108	464.78	308.05	417.293	326.125	268.403	Oda	Ornithine decarboxylase antizyme [Source:FlyBase;Acc:FBgn0014184]
FBgn0014189	19.945	26.8872	14.6421	26.1329	6.68328	21.5054	30.169	21.3349	18.5743	27.3022	Hel25E	Helicase at 25E [Source:FlyBase;Acc:FBgn0014189]
FBgn0014269	5.86495	4.35303	0	8.74534	0	3.70832	3.91984	6.04974	0.591812	4.02497	prod	proliferation disrupter [Source:FlyBase;Acc:FBgn0014269]
FBgn0014340	0.744608	0.280988	0	0	2.00724	0.294308	0.423871	2.27737	0	0.460835	mof	males absent on the first [Source:FlyBase;Acc:FBgn0014340]
FBgn0014342	1.13282	0.92883	0	4.65262	0	0.223132	0.429204	5.01943	0.165247	0.670595	mia	meiosis I arrest [Source:FlyBase;Acc:FBgn0014342]
FBgn0014343	0.631775	0.00738108	0.0886028	0	0	0	0	0	0	0.0148388	mirr	mirror [Source:FlyBase;Acc:FBgn0014343]
FBgn0014366	0.0511514	3.18566	0	2.18828	0.0271434	3.10485	1.54741	0	0.775572	1.40131	noi	noisette [Source:FlyBase;Acc:FBgn0014366]
FBgn0014380	0	0	0.247909	0	0	0.66052	0.601953	0	6.42186	1.86834	RhoL	Rho-like [Source:FlyBase;Acc:FBgn0014380]
FBgn0014388	74.6067	67.4969	130.868	127.57	70.433	95.7608	73.2933	223.422	68.5709	83.1378	sty	sprouty [Source:FlyBase;Acc:FBgn0014388]
FBgn0014391	169.249	208.459	57.5378	101.466	74.6677	111.442	122.559	68.3633	78.5588	82.207	sun	stunted [Source:FlyBase;Acc:FBgn0014391]
FBgn0014396	0	0	1.07	0	0	0	0.00416358	0	0	0	tim	timeless [Source:FlyBase;Acc:FBgn0014396]
FBgn0014411	2.20876	1.56524	4.06648	0.587774	1.60699	1.00268	1.28059	0.877607	2.99743	2.47033	Vps26	Vacuolar protein sorting 26 [Source:FlyBase;Acc:FBgn0014411]
FBgn0014417	0	0.418429	0	0	0	1.00297	0.265634	0.215689	0.041756	0.575415	CG13397	LP03571p [Source:UniProtKB/TrEMBL;Acc:Q9VLL5]
FBgn0014455	0.711172	2.15389	0	3.06434	0	1.55604	1.42379	0	0.951338	2.89287	Ahcy13	Adenosylhomocysteinase at 13 [Source:FlyBase;Acc:FBgn0014455]
FBgn0014857	49.3749	70.4063	28.0625	58.4385	59.2427	48.6988	46.4674	37.107	50.8453	35.7261	His3.3A	Histone H3.3A [Source:FlyBase;Acc:FBgn0014857]
FBgn0014859	0.466726	0	0.0144477	0	0.0321566	0	0.0030659	3.37864	0.00510453	0	Hr38	Hormone receptor-like in 38 [Source:FlyBase;Acc:FBgn0014859]
FBgn0014863	1.59263	2.5593	0	1.60036	1.10635	0.136253	0.304896	1.00828	0	0.105987	Mlp84B	Muscle LIM protein at 84B [Source:FlyBase;Acc:FBgn0014863]
FBgn0014868	6.22213	11.3712	17.3199	7.19115	1.21007	4.64454	14.1126	4.90009	30.4868	16.5845	Ost48	Oligosaccharyltransferase 48kD subunit [Source:FlyBase;Acc:FBgn0014868]
FBgn0014869	9.69493	12.9075	25.6542	7.44558	0.734944	8.57224	11.2557	40.1964	4.89094	13.0276	Pglym78	Phosphoglyceromutase [Source:FlyBase;Acc:FBgn0014869]
FBgn0014870	4.86479	2.76232	7.69586	6.22806	5.52754	5.06247	5.53619	19.9804	4.43246	3.34564	Psi	P-element somatic inhibitor [Source:FlyBase;Acc:FBgn0014870]
FBgn0014877	5.80311	9.32078	2.04525	4.96158	1.33888	7.26572	6.32936	17.5843	8.37378	3.47567	Roe1	Roe1 [Source:FlyBase;Acc:FBgn0014877]
FBgn0014879	18.9324	23.5346	3.41467	15.0142	9.02518	11.9411	19.6701	50.6044	16.0985	6.81336	Set	Set [Source:FlyBase;Acc:FBgn0014879]
FBgn0014903	0.629295	0	7.43592	0.501079	1.4966	0.704862	0	0.279248	0	0.0185318	CG14630	NA
FBgn0014906	15.9278	11.301	4.17597	13.1519	5.04408	17.2931	10.8131	0.102715	10.0432	5.81789	Hydr2	alpha/beta hydrolase2 [Source:FlyBase;Acc:FBgn0014906]
FBgn0014930	2.75247	3.63538	0	1.07389	1.34374	1.69357	3.63827	0	0	2.11562	CG2846	Putative riboflavin kinase [Source:UniProtKB/Swiss-Prot;Acc:O76206]
FBgn0015000	0	0.858091	3.9119	1.09672	0	0	1.13737	0	0	0	betaggt-I	beta subunit of type I geranylgeranyl transferase [Source:FlyBase;Acc:FBgn0015000]
FBgn0015001	0	0.251527	0	0	0	0	0	0	3.23079	0	iotaTry	iotaTrypsin [Source:FlyBase;Acc:FBgn0015001]
FBgn0015010	0	0.12178	0.47787	0.208507	0	0	0.834202	0	0	1.88796	Ag5r	Antigen 5-related [Source:FlyBase;Acc:FBgn0015010]
FBgn0015011	0	0	0	0	0	0	0.285446	0	0.158587	0	Ahcy89E	Adenosylhomocysteinase 89E [Source:FlyBase;Acc:FBgn0015011]
FBgn0015019	3.97055	4.79517	1.80503	10.9389	1.47472	3.85762	4.46894	1.974	4.8575	2.16152	Cctgamma	Cctgamma [Source:FlyBase;Acc:FBgn0015019]
FBgn0015024	54.1292	56.1318	89.9946	95.6432	56.701	78.2787	41.4432	98.9765	49.2699	56.7823	CkIalpha	Casein kinase Ialpha [Source:FlyBase;Acc:FBgn0015024]
FBgn0015025	0	1.86704	1.72683	0.0297101	0.261682	1.2182	0.832641	0	0.649051	0.0461492	CkIIalpha-i1	CKII-alpha subunit interactor-1 [Source:FlyBase;Acc:FBgn0015025]
FBgn0015031	552.299	564.866	309.071	523.502	398.272	493.592	321.601	476.817	399.407	428.657	cype	cyclope [Source:FlyBase;Acc:FBgn0015031]
FBgn0015036	0	0.155974	0	0.225866	0.64039	0.613268	0.162723	0	0	1.01824	Cyp4ae1	Cytochrome P450-4ae1 [Source:FlyBase;Acc:FBgn0015036]
FBgn0015037	0.0431623	0	1.23487	0.0832131	0	0.446809	0.194341	0	0	0	Cyp4p1	Cytochrome P450-4p1 [Source:FlyBase;Acc:FBgn0015037]
FBgn0015039	0	0.576744	0	0.643816	0.277368	0.819827	0.0280175	0	0.122304	0.173922	Cyp9b2	Cytochrome P450-9b2 [Source:FlyBase;Acc:FBgn0015039]
FBgn0015040	0	0	0	0	0.0292509	0.466874	0	0	0	0.247612	Cyp9c1	Cytochrome P450-9c1 [Source:FlyBase;Acc:FBgn0015040]
FBgn0015075	0.936259	1.18752	0.0615112	1.56681	0	2.82517	2.02007	0	0.0651979	0.502205	Ddx1	Dead-box-1 [Source:FlyBase;Acc:FBgn0015075]
FBgn0015218	66.4647	65.5899	45.7138	55.4093	44.4278	65.4977	47.969	109.654	63.0551	39.274	eIF-4E	Eukaryotic initiation factor 4E [Source:FlyBase;Acc:FBgn0015218]
FBgn0015221	46.3235	49.6331	61.9698	62.7235	27.6689	47.0622	39.8001	21.1687	24.6752	37.2615	Fer2LCH	Ferritin 2 light chain homologue [Source:FlyBase;Acc:FBgn0015221]
FBgn0015222	24.0177	27.096	10.8587	26.0431	7.36394	31.9183	21.3811	11.6511	8.41953	27.0602	Fer1HCH	Ferritin 1 heavy chain homologue [Source:FlyBase;Acc:FBgn0015222]
FBgn0015229	25.9842	17.4826	40.3371	13.9067	9.80297	11.2637	14.4268	69.6979	25.7299	14.6978	glec	gliolectin [Source:FlyBase;Acc:FBgn0015229]
FBgn0015239	4.20696	4.35584	2.23892	5.4299	1.42997	5.281	5.14824	4.76981	0.144065	0.41614	Hr78	Hormone-receptor-like in 78 [Source:FlyBase;Acc:FBgn0015239]
FBgn0015240	1.24247	1.98524	3.13314	1.04414	1.47078	1.57401	0.691605	0	1.81142	0.302115	Hr96	Hormone receptor-like in 96 [Source:FlyBase;Acc:FBgn0015240]
FBgn0015245	12.4429	5.59635	5.87898	7.06114	4.66647	8.32732	7.35022	16.0379	8.12834	5.67517	Hsp60	Heat shock protein 60 [Source:FlyBase;Acc:FBgn0015245]
FBgn0015247	16.2893	12.5504	2.41498	11.5127	7.41291	6.54189	7.64804	4.01576	6.58783	1.7871	Diap2	Death-associated inhibitor of apoptosis 2 [Source:FlyBase;Acc:FBgn0015247]
FBgn0015268	19.6438	17.4143	8.34284	18.6257	6.64159	19.7526	19.2755	21.9958	32.5629	6.67984	Nap1	Nucleosome assembly protein 1 [Source:FlyBase;Acc:FBgn0015268]
FBgn0015269	2.48829	1.73704	7.82733	3.19572	1.95395	1.92295	2.30648	3.87739	2.70209	2.24893	Nf1	Neurofibromin 1 [Source:FlyBase;Acc:FBgn0015269]
FBgn0015270	0	0.01171	0.196794	0.954806	0	0	0.136525	0	0	0	Orc2	Origin recognition complex subunit 2 [Source:FlyBase;Acc:FBgn0015270]
FBgn0015271	0	0.936445	0	0	0	0	0.201159	0	0	1.27625	Orc5	Origin recognition complex subunit 5 [Source:FlyBase;Acc:FBgn0015271]
FBgn0015277	0.105944	1.49397	0.892472	1.82464	1.04942	0.87737	0.85182	0	5.18792	1.72734	Pi3K59F	Phosphotidylinositol 3 kinase 59F [Source:FlyBase;Acc:FBgn0015277]
FBgn0015278	0.830989	1.50805	2.2104	2.42365	1.19227	2.06947	3.49944	1.22891	1.55455	0.972869	Pi3K68D	Phosphotidylinositol 3 kinase 68D [Source:FlyBase;Acc:FBgn0015278]
FBgn0015279	2.23568	1.14213	0.562967	0.818405	2.43138	2.8226	1.11486	4.91205	1.49812	1.24374	Pi3K92E	Pi3K92E [Source:FlyBase;Acc:FBgn0015279]
FBgn0015282	8.544	14.2531	12.3254	7.56286	8.84312	13.4266	9.02312	10.966	14.7759	14.7322	Rpt2	Regulatory particle triple-A ATPase 2 [Source:FlyBase;Acc:FBgn0015282]
FBgn0015283	11.5124	10.232	5.36531	17.3901	9.63235	10.344	14.3196	13.1484	13.5984	6.66493	Rpn10	Regulatory particle non-ATPase 10 [Source:FlyBase;Acc:FBgn0015283]
FBgn0015286	1.84814	2.88364	5.10672	4.45663	6.50017	1.8968	2.25694	6.68016	5.00876	1.68512	Rala	Ras-like protein A [Source:FlyBase;Acc:FBgn0015286]
FBgn0015288	82.9738	86.4425	80.2191	76.8574	93.6199	75.1515	79.1653	129.852	58.0478	67.5096	RpL22	Ribosomal protein L22 [Source:FlyBase;Acc:FBgn0015288]
FBgn0015295	0.0705731	0	0.0350199	0.110615	0.0600346	0.0201351	0.0487176	0	0.0721847	0	shark	SH2 ankyrin repeat kinase [Source:FlyBase;Acc:FBgn0015295]
FBgn0015296	11.0181	6.18967	10.8999	3.79004	2.58777	10.5409	4.96979	4.66095	1.97688	2.16014	Shc	SHC-adaptor protein [Source:FlyBase;Acc:FBgn0015296]
FBgn0015298	8.76537	7.743	13.851	4.91245	1.62256	7.76929	5.21196	16.353	13.2216	3.35747	Srp19	Signal recognition particle protein 19 [Source:FlyBase;Acc:FBgn0015298]
FBgn0015299	123.459	190.778	70.1228	59.8847	64.5616	169.517	165.145	167.612	63.4487	78.6982	Ssb-c31a	Single stranded-binding protein c31A [Source:FlyBase;Acc:FBgn0015299]
FBgn0015316	2.23066	1.25727	0	0	0	0.680829	2.41398	4.23192	1.92978	0	Try29F	Trypsin 29F [Source:FlyBase;Acc:FBgn0015316]
FBgn0015320	19.0349	13.8101	27.3542	33.0531	13.9446	22.0877	13.7968	28.6224	30.3298	18.7955	Ubc2	Ubiquitin conjugating enzyme 2 [Source:FlyBase;Acc:FBgn0015320]
FBgn0015321	4.42792	5.17821	8.84374	5.30141	5.03417	4.8969	2.69394	4.13252	13.6603	5.18017	Ubc4	Ubiquitin conjugating enzyme 4 [Source:FlyBase;Acc:FBgn0015321]
FBgn0015331	2.05177	0.01171	0.0843401	0.113667	0.325379	0.0332908	1.28561	0.236492	0	0.0353123	abs	abstrakt [Source:FlyBase;Acc:FBgn0015331]
FBgn0015338	20.6055	30.2591	15.4854	4.79751	8.14487	12.9781	14.3029	1.7656	11.4211	13.0577	CG5861	CG5861 [Source:UniProtKB/TrEMBL;Acc:Q9V3I6]
FBgn0015351	2.95071	3.92167	0.158683	1.06931	2.87258	0.187907	0.877631	0	0.485893	3.34409	CG14906	LD37858p [Source:UniProtKB/TrEMBL;Acc:Q9VER8]
FBgn0015359	7.53854	0.993827	9.53459	5.54048	0.968972	5.8222	3.46158	0	1.73352	0	CG2034	Anon-i1 protein [Source:UniProtKB/TrEMBL;Acc:Q24050]
FBgn0015360	0.147697	0.066949	0.598586	0.676637	0.0145781	0.62843	0.254829	0	0.0112931	0.203483	oxt	peptide O-xylosyltransferase [Source:FlyBase;Acc:FBgn0015360]
FBgn0015371	33.8917	27.1547	74.5079	55.6847	30.9797	42.9388	35.11	93.9782	44.0934	31.1173	chn	charlatan [Source:FlyBase;Acc:FBgn0015371]
FBgn0015372	1.20676	2.41138	2.70166	1.24837	0.374847	2.20205	1.12172	8.48555	1.4132	2.17417	RabX1	RabX1 [Source:FlyBase;Acc:FBgn0015372]
FBgn0015379	11.9628	13.8564	5.20591	12.8695	4.15397	9.9386	15.7039	5.06563	8.49161	11.4896	dod	dodo [Source:FlyBase;Acc:FBgn0015379]
FBgn0015380	21.0066	30.8152	31.2052	41.6668	7.97484	34.1426	37.9408	77.9548	39.5692	37.4682	drl	derailed [Source:FlyBase;Acc:FBgn0015380]
FBgn0015391	0.23615	0.17708	0.114902	0.0464567	0.225051	0.312943	0.56264	0	0	0.0577297	glu	gluon [Source:FlyBase;Acc:FBgn0015391]
FBgn0015393	1.9945	7.85877	18.1004	2.23271	5.73574	1.81643	7.38709	0	0	0	hoip	hoi-polloi [Source:FlyBase;Acc:FBgn0015393]
FBgn0015396	2.26923	4.04269	3.42555	0.417702	1.19811	0.949715	1.42478	2.34415	4.68746	2.988	jumu	jumeau [Source:FlyBase;Acc:FBgn0015396]
FBgn0015399	1.0928	1.01575	0.940031	2.37958	0.544387	26.0249	20.9152	59.6508	18.4449	20.0768	kek1	kekkon-1 [Source:FlyBase;Acc:FBgn0015399]
FBgn0015400	12.4084	10.1097	24.0074	18.185	9.37381	0.0521307	1.33023	2.93175	0.834728	0.132097	kek2	kekkon-2 [Source:FlyBase;Acc:FBgn0015400]
FBgn0015402	0.579996	0.260033	2.27552	0.16583	0.138345	0.509609	0.264918	1.13379	1.18515	0.476553	ksr	kinase suppressor of ras [Source:FlyBase;Acc:FBgn0015402]
FBgn0015477	2.49959	0.65251	1.90595	2.33295	1.40049	1.49972	1.13849	1.53741	0.235228	1.19974	Rme-8	Receptor mediated endocytosis 8 [Source:FlyBase;Acc:FBgn0015477]
FBgn0015509	4.66943	5.62562	7.47164	3.8158	2.90129	5.1945	3.85162	3.99769	3.4119	2.66582	Cul1	Cullin 1 [Source:FlyBase;Acc:FBgn0015509]
FBgn0015513	0.260906	0.702439	0.048381	0.00558894	1.54941	0.220979	0.143147	2.01708	0.224658	0.287656	mbc	myoblast city [Source:FlyBase;Acc:FBgn0015513]
FBgn0015519	0.435392	1.22931	2.84108	0.842196	0.922503	1.93527	6.00884	9.31003	4.7172	5.03339	nAChRalpha3	nicotinic Acetylcholine Receptor alpha3 [Source:FlyBase;Acc:FBgn0015519]
FBgn0015520	1.45539	2.77602	0.65589	1.95042	3.05153	6.08817	3.13378	8.89902	3.00506	4.42926	nonA-l	nonA-like [Source:FlyBase;Acc:FBgn0015520]
FBgn0015521	214.133	192.132	126.818	200.622	49.1265	163.438	168.934	154.3	180.982	137.374	RpS21	Ribosomal protein S21 [Source:FlyBase;Acc:FBgn0015521]
FBgn0015522	0.0137531	0.0136577	1.5739	0	0	0	0	0	0	0	olf186-M	olf186-M [Source:FlyBase;Acc:FBgn0015522]
FBgn0015524	0.0198251	0	0	0	0	0.139928	0.057384	0	0	0	otp	orthopedia [Source:FlyBase;Acc:FBgn0015524]
FBgn0015527	0.0431058	0.200785	0.327332	1.77464	0.0746475	0	0.240968	0.151892	0	0.0524883	pen	penguin [Source:FlyBase;Acc:FBgn0015527]
FBgn0015541	0.139842	0.421097	0.0215101	0.269603	0	0.114622	0.0435242	0	0	0.022515	sda	slamdance [Source:FlyBase;Acc:FBgn0015541]
FBgn0015544	2.83483	1.97191	1.43271	1.36003	0.083187	3.17184	1.08397	0	0	0.912832	spag	spaghetti [Source:FlyBase;Acc:FBgn0015544]
FBgn0015546	1.85239	0.400205	0.037018	0.293012	2.03673	0.541803	0.973282	0.680389	0.0130789	0	spel1	spellchecker1 [Source:FlyBase;Acc:FBgn0015546]
FBgn0015553	0	0.668468	0.160486	0	0	0.325787	0.185562	0	0	0	tos	tosca [Source:FlyBase;Acc:FBgn0015553]
FBgn0015558	10.6583	8.22422	33.8728	29.1776	11.3263	10.0207	6.45863	18.5316	7.62285	6.24352	tty	tweety [Source:FlyBase;Acc:FBgn0015558]
FBgn0015568	0.0219727	0	0	0	0	0	0	0	0	0.548339	alpha-Est1	alpha-Esterase-1 [Source:FlyBase;Acc:FBgn0015568]
FBgn0015577	0.56037	2.11549	2.66405	0.293427	0.408929	1.88555	1.5552	15.0689	1.06025	0	alpha-Est9	alpha-Esterase-9 [Source:FlyBase;Acc:FBgn0015577]
FBgn0015582	0.0718869	0.93551	0	0	0	0.819975	1.69266	0	3.60121	1.33671	dare	defective in the avoidance of repellents [Source:FlyBase;Acc:FBgn0015582]
FBgn0015584	0.282033	1.68046	0	0	0	0	0	0	0	0	Acp53Ea	Accessory gland protein 53Ea [Source:FlyBase;Acc:FBgn0015584]
FBgn0015589	5.30277	3.88487	13.8667	6.82863	7.03612	7.86729	4.67558	7.28025	10.9713	4.60046	Apc	APC-like [Source:FlyBase;Acc:FBgn0015589]
FBgn0015600	6.87715	4.08775	3.62766	4.39489	5.28	5.22793	3.9063	13.5599	3.76563	5.04071	toc	toucan [Source:FlyBase;Acc:FBgn0015600]
FBgn0015602	23.5486	19.395	4.99359	10.4186	5.42821	15.5045	12.6588	0	1.82833	5.93434	BEAF-32	Boundary element-associated factor of 32kD [Source:FlyBase;Acc:FBgn0015602]
FBgn0015609	90.5992	76.7985	206.22	153.385	65.4112	77.5246	75.9822	180.023	71.7224	69.7005	CadN	Cadherin-N [Source:FlyBase;Acc:FBgn0015609]
FBgn0015614	59.209	59.5529	59.0239	51.414	47.8559	48.7632	35.1738	37.4117	55.481	25.8621	CanB2	Calcineurin B2 [Source:FlyBase;Acc:FBgn0015614]
FBgn0015615	2.40226	1.23617	1.80932	1.4315	1.03139	2.14253	2.68652	17.6838	1.99595	2.09823	SMC3	Structural maintenance of chromosomes 3 [Source:FlyBase;Acc:FBgn0015615]
FBgn0015618	0.177711	0.782682	0	0.344098	0.204848	0.638556	0.0775955	0	0.027133	0.36947	Cdk8	Cyclin-dependent kinase 8 [Source:FlyBase;Acc:FBgn0015618]
FBgn0015621	1.75528	1.4355	0	2.26929	0	0	2.4706	0	3.96602	0.22675	Clp	Clipper [Source:FlyBase;Acc:FBgn0015621]
FBgn0015622	18.9783	12.695	38.194	29.3108	15.3294	23.872	16.3055	39.3952	24.4875	12.8578	Cnx99A	Calnexin 99A [Source:FlyBase;Acc:FBgn0015622]
FBgn0015623	1.07906	1.99312	0	2.538	1.35134	1.79739	0.291512	0	3.59942	1.19562	Cpr	Cytochrome P450 reductase [Source:FlyBase;Acc:FBgn0015623]
FBgn0015663	0.069981	0	0	0	0	0.395145	0.108032	0	0	0	Dot	Dorothy [Source:FlyBase;Acc:FBgn0015663]
FBgn0015664	5.97323	3.52322	6.60592	6.67345	4.87906	1.2188	2.37798	2.44002	3.85895	1.40251	Dref	DNA replication-related element factor [Source:FlyBase;Acc:FBgn0015664]
FBgn0015721	0.155765	0	0	0.953895	0.894633	2.50921	1.12273	0	2.84027	1.52743	ktub	king tubby [Source:FlyBase;Acc:FBgn0015721]
FBgn0015737	1.28739	1.76272	2.76704	2.42556	1.78033	0.110139	2.74771	4.25433	3.48332	3.58269	Hmu	Hemomucin [Source:FlyBase;Acc:FBgn0015737]
FBgn0015754	25.3196	22.9978	23.858	30.9124	15.6669	20.0813	25.5555	16.9875	20.1849	17.5858	Lis-1	Lissencephaly-1 [Source:FlyBase;Acc:FBgn0015754]
FBgn0015756	156.879	203.65	87.7219	138.769	78.3543	186.678	151.025	29.6379	83.7324	126.642	RpL9	Ribosomal protein L9 [Source:FlyBase;Acc:FBgn0015756]
FBgn0015765	1.77334	1.21274	0	0.171954	0	0.43558	0.760836	0	0.0577607	0.239571	p38a	p38a MAP kinase [Source:FlyBase;Acc:FBgn0015765]
FBgn0015766	0.850937	0.426131	0	0.540266	0	0	0.13519	0	0	0.104901	Msr-110	Msr-110 [Source:FlyBase;Acc:FBgn0015766]
FBgn0015772	3.44383	1.36001	6.16526	5.04972	3.74748	2.26919	3.39586	12.6481	3.2596	1.4658	Nak	Numb-associated kinase [Source:FlyBase;Acc:FBgn0015772]
FBgn0015773	0.00687068	0	0	0	0	32.0678	2.55823	18.7734	4.46779	5.65242	NetA	Netrin-A [Source:FlyBase;Acc:FBgn0015773]
FBgn0015774	0.225274	0.00266323	1.65602	0.0650054	0.0227698	146.642	94.8322	355.155	162.419	107.425	NetB	Netrin-B [Source:FlyBase;Acc:FBgn0015774]
FBgn0015776	0	0.388739	0	0.509926	0	0.149347	0.786003	0.492444	0.231711	1.28845	nrv1	nervana 1 [Source:FlyBase;Acc:FBgn0015776]
FBgn0015777	1.22319	0.324724	0	0	0.0257064	0	0.151905	0	0	0.16925	nrv2	nervana 2 [Source:FlyBase;Acc:FBgn0015777]
FBgn0015778	13.1114	13.3103	27.89	22.276	8.73906	13.2651	11.9026	45.0623	16.1916	10.2367	rin	rasputin [Source:FlyBase;Acc:FBgn0015778]
FBgn0015781	12.1724	3.14537	5.66718	1.8363	0.157284	7.32599	7.17688	0	0.236962	4.12048	P5cr	Pyrroline 5-carboyxlate reductase [Source:FlyBase;Acc:FBgn0015781]
FBgn0015789	0.246627	0.773934	4.46877	2.77677	3.54629	0.891243	1.40869	11.4753	2.62591	3.61404	Rab10	Rab10 [Source:FlyBase;Acc:FBgn0015789]
FBgn0015790	6.1542	7.78367	9.9383	6.3946	3.82313	12.0915	7.7199	8.2403	3.95181	1.44668	Rab11	Rab11 [Source:FlyBase;Acc:FBgn0015790]
FBgn0015791	56.8563	51.1761	48.0647	54.4454	46.2917	52.8569	42.8712	56.9481	39.7581	56.9058	Rab14	Rab14 [Source:FlyBase;Acc:FBgn0015791]
FBgn0015793	4.72693	8.50161	8.82795	6.17666	2.78705	4.37426	2.73643	16.5903	12.3876	0	Rab19	Rab19 [Source:FlyBase;Acc:FBgn0015793]
FBgn0015794	14.2074	17.2247	5.63143	16.7198	12.6463	19.6075	8.36756	13.0803	21.5001	7.355	Rab18	Rab18 [Source:FlyBase;Acc:FBgn0015794]
FBgn0015795	16.1162	30.2485	22.4105	22.8248	17.6737	35.0775	20.0841	25.9294	23.4797	22.6134	Rab7	Rab7 [Source:FlyBase;Acc:FBgn0015795]
FBgn0015797	4.57087	6.70347	13.0399	11.0378	4.93525	12.2796	13.0168	7.77191	7.37144	7.46155	Rab6	Rab6 [Source:FlyBase;Acc:FBgn0015797]
FBgn0015799	0.99582	0.388284	0.0436967	0.447573	0.22045	2.48371	1.03154	0	0.751343	0.573254	Rbf	Retinoblastoma-family protein [Source:FlyBase;Acc:FBgn0015799]
FBgn0015803	1.71192	2.7184	9.1478	4.27136	1.37601	6.18464	3.90155	3.06619	3.80304	0.729957	RtGEF	Rho-type guanine nucleotide exchange factor [Source:FlyBase;Acc:FBgn0015803]
FBgn0015805	4.62471	3.467	0.889589	1.5477	1.27199	3.45925	4.3251	14.9666	2.72396	3.89948	Rpd3	Rpd3 [Source:FlyBase;Acc:FBgn0015805]
FBgn0015808	4.2588	1.27628	2.49335	4.63971	0.0267447	3.16597	2.40707	0.0631754	5.11576	0.125776	ScpX	Sterol carrier protein X-related thiolase [Source:FlyBase;Acc:FBgn0015808]
FBgn0015818	1.24062	1.52535	0	3.24603	0.783732	1.70958	1.254	5.03554	0.0746456	0.353832	Spx	Spliceosomal protein on the X [Source:FlyBase;Acc:FBgn0015818]
FBgn0015828	0.899712	3.48453	2.46681	3.6715	2.80093	2.49776	2.32933	0.0751847	0	4.25106	TfIIEalpha	Transcription factor IIEalpha [Source:FlyBase;Acc:FBgn0015828]
FBgn0015829	5.40446	8.68937	11.9033	11.4116	11.253	1.0172	6.72021	5.4195	2.68811	3.87915	TfIIEbeta	Transcription factor IIEbeta [Source:FlyBase;Acc:FBgn0015829]
FBgn0015834	23.8103	40.9673	21.9657	29.554	22.9335	38.7714	32.4081	60.0683	34.3115	38.918	Trip1	Trip1 [Source:FlyBase;Acc:FBgn0015834]
FBgn0015838	2.17756	5.72452	5.28246	4.76116	3.39582	3.49508	2.9524	0.986766	4.16052	5.13952	Vang	Van Gogh [Source:FlyBase;Acc:FBgn0015838]
FBgn0015903	0	0.150685	0	0.302869	0	0.0676405	0.0308215	0	0	0.454403	apt	apontic [Source:FlyBase;Acc:FBgn0015903]
FBgn0015904	0	0.0153208	0	0.0148717	0.065494	0	0	0	0	0	ara	araucan [Source:FlyBase;Acc:FBgn0015904]
FBgn0015905	0.354688	0.106487	3.18587	1.43122	0.595284	0.0465751	0.358133	0.372218	0.180653	0.304654	ast	asteroid [Source:FlyBase;Acc:FBgn0015905]
FBgn0015919	0	0	0.0120664	0	0	0	0	0.0253757	0	0.00505206	caup	caupolican [Source:FlyBase;Acc:FBgn0015919]
FBgn0015924	1.95039	3.85636	12.4386	1.95056	1.7853	1.81643	2.17267	1.51206	4.39471	2.77431	crq	croquemort [Source:FlyBase;Acc:FBgn0015924]
FBgn0015925	0.211888	0.420836	4.04138	0	1.19933	0.332337	1.27206	12.9847	4.56125	2.41169	csul	capsuleen [Source:FlyBase;Acc:FBgn0015925]
FBgn0015926	0.452055	0	0	0	0	0.749079	0	0	0	0	dah	discontinuous actin hexagon [Source:FlyBase;Acc:FBgn0015926]
FBgn0015929	0.00806124	0.408271	0.0576577	1.28993	0	0.18207	0.256667	0	0	0	dpa	disc proliferation abnormal [Source:FlyBase;Acc:FBgn0015929]
FBgn0015946	0.344183	0	0.0338524	0	0	0.921995	0.0603782	0.980582	0	0	grim	grim [Source:FlyBase;Acc:FBgn0015946]
FBgn0015949	5.14934	7.1964	8.51805	8.69664	3.62485	7.27357	5.60974	20.8992	4.97185	2.94398	hrg	hiiragi [Source:FlyBase;Acc:FBgn0015949]
FBgn0016032	0	0	0	0	0	1.89728	3.47775	0	5.60934	1.49412	lbm	late bloomer [Source:FlyBase;Acc:FBgn0016032]
FBgn0016034	0	0	0	0	0	1.17649	0.0394658	0	0	0	mael	maelstrom [Source:FlyBase;Acc:FBgn0016034]
FBgn0016036	0	0	0	0	2.86659	0.0778123	0	0	0	0	mei-P22	meiotic P22 [Source:FlyBase;Acc:FBgn0016036]
FBgn0016038	20.4446	10.8367	8.67253	9.24806	6.88932	13.9551	14.0695	25.7129	7.4349	10.5875	mod(r)	modifier of rudimentary [Source:FlyBase;Acc:FBgn0016038]
FBgn0016041	16.5486	17.9096	15.3759	19.3318	9.00083	24.5211	9.60509	2.35704	17.5007	7.10022	Tom40	Translocase of outer membrane 40 [Source:FlyBase;Acc:FBgn0016041]
FBgn0016047	0	0	0.102369	0	0	0	0	0.999851	0	0	nompA	no mechanoreceptor potential A [Source:FlyBase;Acc:FBgn0016047]
FBgn0016054	0	0	0	0	0	0	0	0	0.159473	0.0590568	phr6-4	(6-4)-photolyase [Source:FlyBase;Acc:FBgn0016054]
FBgn0016059	4.13439	4.08896	12.8162	5.47008	3.28805	6.89834	4.69494	4.8276	7.62027	5.01524	Sema-1b	Sema-1b [Source:FlyBase;Acc:FBgn0016059]
FBgn0016061	27.8182	34.2535	77.9882	47.6939	21.2525	48.5537	75.7654	181.628	66.8229	54.7394	side	sidestep [Source:FlyBase;Acc:FBgn0016061]
FBgn0016070	1.16121	2.26355	9.09863	5.12658	4.28252	4.63164	4.49479	11.5229	2.28472	4.33106	smg	smaug [Source:FlyBase;Acc:FBgn0016070]
FBgn0016075	0.0640628	0.308048	0	0.227505	0.357829	0	0.0260252	0	0	0.020194	vkg	viking [Source:FlyBase;Acc:FBgn0016075]
FBgn0016076	2.44754	0	0.778925	0	0	0.0413854	0	0	0.518613	0.26339	vri	vrille [Source:FlyBase;Acc:FBgn0016076]
FBgn0016078	1.01671	2.17584	0	0.864763	1.39683	2.45325	2.15112	4.08515	0.025189	0.0925234	wun	wunen [Source:FlyBase;Acc:FBgn0016078]
FBgn0016080	0.0237285	0	0	0.243981	0	0.303826	0.183153	0	0	0.939554	xmas-1	xmas-1 [Source:FlyBase;Acc:FBgn0016080]
FBgn0016081	0.717066	0.438817	1.30763	1.04108	0.633383	0.993135	0.512259	3.56171	0.656274	1.08339	fry	furry [Source:FlyBase;Acc:FBgn0016081]
FBgn0016119	163.072	161.276	219.026	170.807	65.4068	146.678	134.566	103.974	173.552	131.823	ATPsyn-Cf6	ATPase coupling factor 6 [Source:FlyBase;Acc:FBgn0016119]
FBgn0016120	116.835	178.171	142.726	111.974	73.4232	124.501	120.517	114.036	120.686	94.2379	ATPsyn-d	ATP synthase, subunit d [Source:FlyBase;Acc:FBgn0016120]
FBgn0016122	2.26087	4.18919	2.11581	3.4683	2.57647	5.51468	1.49487	8.66996	10.3802	1.95262	Acer	Angiotensin-converting enzyme-related [Source:FlyBase;Acc:FBgn0016122]
FBgn0016123	0	0	0.0277009	0.134399	0	0	0.235414	0	0	0	Aph-4	Alkaline phosphatase 4 [Source:FlyBase;Acc:FBgn0016123]
FBgn0016126	26.3135	30.0881	29.8271	21.4039	28.0213	45.5745	31.2617	32.421	13.9767	35.4118	CaMKI	Calcium/calmodulin-dependent protein kinase I [Source:FlyBase;Acc:FBgn0016126]
FBgn0016641	0.397245	0.292686	1.04893	4.10102	0.353596	0.50649	1.18692	9.44477	2.72013	1.38149	PTP-ER	Protein tyrosine phosphatase-ERK/Enhancer of Ras1 [Source:FlyBase;Acc:FBgn0016641]
FBgn0016672	3.39271	1.40087	15.5389	8.74408	2.31202	3.176	4.70338	0	1.98546	10.7364	Ipp	Inositol polyphosphate 1-phosphatase [Source:FlyBase;Acc:FBgn0016672]
FBgn0016684	0	0	0	0.0164631	0	0	0	4.39139	0	1.62812	NaPi-T	Na[+]-dependent inorganic phosphate cotransporter [Source:FlyBase;Acc:FBgn0016684]
FBgn0016685	34.6753	53.8349	5.97888	31.8138	2.62862	47.1999	68.5547	55.5727	36.3544	73.3991	Nlp	Nucleoplasmin [Source:FlyBase;Acc:FBgn0016685]
FBgn0016687	24.016	34.7404	17.0769	34.0253	12.1972	33.8838	26.0124	27.7967	60.7557	22.3659	Nurf-38	Nucleosome remodeling factor - 38kD [Source:FlyBase;Acc:FBgn0016687]
FBgn0016691	183.099	223.127	117.433	140.467	73.0192	163.866	121.737	109.389	103.805	88.2276	Oscp	Oligomycin sensitivity-conferring protein [Source:FlyBase;Acc:FBgn0016691]
FBgn0016693	3.4314	2.43159	5.59539	6.25951	0.719356	1.33952	2.46875	4.33305	1.52298	3.25371	Past1	Putative Achaete Scute Target 1 [Source:FlyBase;Acc:FBgn0016693]
FBgn0016694	22.0001	18.7086	51.7076	40.3429	25.8129	20.7157	18.6445	37.8923	30.2214	18.9625	Pdp1	PAR-domain protein 1 [Source:FlyBase;Acc:FBgn0016694]
FBgn0016696	8.89856	5.41682	20.0854	13.9954	5.11889	7.52549	5.51456	20.5055	6.07015	5.38757	Pitslre	Pitslre [Source:FlyBase;Acc:FBgn0016696]
FBgn0016697	34.7896	23.9551	5.34911	10.7514	24.9319	18.765	29.3431	2.31603	41.8955	22.9144	Prosalpha5	Proteasome alpha5 subunit [Source:FlyBase;Acc:FBgn0016697]
FBgn0016698	2.51956	1.76933	0	2.39405	1.5662	4.52202	3.33389	7.03831	0.697344	0.233543	Ptpa	Phosphotyrosyl phosphatase activator [Source:FlyBase;Acc:FBgn0016698]
FBgn0016700	26.3082	22.9175	21.0549	49.1256	12.1688	30.3525	31.3743	21.5751	33.28	15.8	Rab1	Rab1 [Source:FlyBase;Acc:FBgn0016700]
FBgn0016701	13.0406	17.23	7.17658	12.0901	5.57012	25.0044	9.18608	16.2534	10.1748	12.5859	Rab4	Rab4 [Source:FlyBase;Acc:FBgn0016701]
FBgn0016726	977.686	1326.31	798.495	850.752	1224.15	1525.52	1106.22	753.615	1162.45	948.756	RpL29	Ribosomal protein L29 [Source:FlyBase;Acc:FBgn0016726]
FBgn0016754	2.08911	3.77898	7.6957	2.81918	1.80387	4.85547	5.26145	7.38605	3.85329	3.50307	sba	six-banded [Source:FlyBase;Acc:FBgn0016754]
FBgn0016756	3.03744	1.07196	1.78747	3.41014	1.16669	1.58505	2.43593	3.61446	1.4468	1.84046	Ubp64E	Ubiquitin-specific protease 64E [Source:FlyBase;Acc:FBgn0016756]
FBgn0016762	1.13331	3.18876	3.0022	1.86122	0.0445473	1.36279	2.5514	0	0	1.61314	angel	angel [Source:FlyBase;Acc:FBgn0016762]
FBgn0016794	2.15818	1.25191	1.15977	2.04737	1.33793	0.63832	0.548667	0.240466	0.81952	1.07375	dos	daughter of sevenless [Source:FlyBase;Acc:FBgn0016794]
FBgn0016797	6.54086	4.8424	12.7271	7.71829	8.0557	24.8058	22.173	50.9701	25.0263	19.7578	fz2	frizzled 2 [Source:FlyBase;Acc:FBgn0016797]
FBgn0016917	2.75969	1.25396	4.06566	4.48116	1.29358	1.76734	1.03593	5.97446	1.50288	0.797337	Stat92E	Signal-transducer and activator of transcription protein at 92E [Source:FlyBase;Acc:FBgn0016917]
FBgn0016919	0	0	0	0	0	0	0.049048	0	0.0142738	0	nompB	no mechanoreceptor potential B [Source:FlyBase;Acc:FBgn0016919]
FBgn0016926	2.57041	6.34554	11.201	1.30879	3.98887	3.76088	1.65189	0	5.49469	1.8759	Pino	Pinocchio [Source:FlyBase;Acc:FBgn0016926]
FBgn0016930	15.3844	11.9945	19.276	16.551	8.99631	17.8499	19.742	27.2651	20.9134	13.9469	Dyrk2	Dual-specificity tyrosine phosphorylation-regulated kinase 2 [Source:FlyBase;Acc:FBgn0016930]
FBgn0016970	5.80002	2.53605	0	0.0725752	0	1.3924	1.20493	0	0	0.189883	l(2)k10201	lethal (2) k10201 [Source:FlyBase;Acc:FBgn0016970]
FBgn0016975	6.07192	7.71182	13.8629	10.4337	10.429	11.7064	7.69695	8.32624	5.52117	6.09743	stnB	stoned B [Source:FlyBase;Acc:FBgn0016975]
FBgn0016976	6.07192	7.71182	13.8616	10.4337	10.429	11.7064	7.69695	8.32624	5.52117	6.09735	stnA	stoned A [Source:FlyBase;Acc:FBgn0016976]
FBgn0016977	14.2285	10.956	39.1485	21.4004	16.5543	15.6072	17.2525	50.3907	18.0056	16.5095	spen	split ends [Source:FlyBase;Acc:FBgn0016977]
FBgn0016978	4.04102	5.68143	4.14657	5.38255	2.49349	6.01428	3.6726	30.3681	5.89869	3.57124	snRNP-U1-70K	small ribonucleoprotein particle U1 subunit 70K [Source:FlyBase;Acc:FBgn0016978]
FBgn0016983	0.756339	1.87358	2.27137	1.12166	1.79676	0.492765	2.47612	3.97453	2.37489	1.08167	smid	smallminded [Source:FlyBase;Acc:FBgn0016983]
FBgn0016984	0	0.0116899	0	0	0	0	0	0	0.76013	0	sktl	skittles [Source:FlyBase;Acc:FBgn0016984]
FBgn0017414	14.9474	13.0001	0	4.73255	1.84454	15.4024	17.1537	23.2183	4.93611	3.12303	cag	cag [Source:FlyBase;Acc:FBgn0017414]
FBgn0017418	5.56024	2.20715	16.5052	9.3058	3.61019	4.73685	3.41613	23.8452	4.60014	2.80324	ari-1	ariadne 1 [Source:FlyBase;Acc:FBgn0017418]
FBgn0017429	3.3326	0.0318219	15.6999	0	2.31258	4.29724	0.587431	0	0.0269925	0.84766	CG5989	CG5989, isoform A [Source:UniProtKB/TrEMBL;Acc:Q9VSM4]
FBgn0017430	7.09219	4.15667	5.54296	3.51707	3.2054	8.82852	6.87533	5.06643	4.81197	1.55986	Nelf-E	Negative elongation factor E [Source:FlyBase;Acc:FBgn0017430]
FBgn0017457	4.55712	2.74763	4.21984	1.13744	2.46142	3.90569	2.29658	4.38619	1.06249	0.223389	U2af38	U2 small nuclear riboprotein auxiliary factor 38 [Source:FlyBase;Acc:FBgn0017457]
FBgn0017545	287.781	291.376	199.994	226.215	140.348	280.349	205.294	159.138	138.659	152.593	RpS3A	Ribosomal protein S3A [Source:FlyBase;Acc:FBgn0017545]
FBgn0017550	1.37951	1.96181	6.02247	2.56506	1.92372	2.61712	2.07389	4.66479	2.51458	1.88144	Rga	Regena [Source:FlyBase;Acc:FBgn0017550]
FBgn0017551	2.25951	3.59328	2.3733	1.76682	1.71047	2.54272	2.48496	0	4.52533	2.58671	Rca1	Regulator of cyclin A1 [Source:FlyBase;Acc:FBgn0017551]
FBgn0017558	2.01436	2.5837	11.6788	3.78153	2.19792	6.06785	1.30851	0	5.30287	2.53378	Pdk	Pyruvate dehydrogenase kinase [Source:FlyBase;Acc:FBgn0017558]
FBgn0017566	6.25101	4.38497	2.98067	5.82911	2.33373	5.66071	4.04646	10.9808	3.43567	5.07713	ND75	NADH:ubiquinone reductase 75kD subunit precursor [Source:FlyBase;Acc:FBgn0017566]
FBgn0017567	32.2191	49.4998	10.1616	19.3589	24.5338	34.2636	31.818	0	9.37112	18.3163	ND23	NADH:ubiquinone reductase 23kD subunit precursor [Source:FlyBase;Acc:FBgn0017567]
FBgn0017572	14.4493	9.98837	24.1025	15.6515	3.72525	12.1989	7.64474	0.566059	5.4466	7.20234	Mo25	Mo25 [Source:FlyBase;Acc:FBgn0017572]
FBgn0017577	0	0.46404	0	0	0	0	0.00901699	0	0	0	Mcm5	Minichromosome maintenance 5 [Source:FlyBase;Acc:FBgn0017577]
FBgn0017578	12.3927	7.61913	0.428324	3.87921	4.1592	10.4408	3.11547	0.968632	3.30115	2.94777	Max	Max [Source:FlyBase;Acc:FBgn0017578]
FBgn0017579	287.793	322.93	166.494	218.202	153.78	319.849	246.48	198.645	175.676	229.069	RpL14	Ribosomal protein L14 [Source:FlyBase;Acc:FBgn0017579]
FBgn0017581	12.2763	8.32466	24.6569	21.2282	14.4977	12.7888	10.8915	30.7637	12.8517	9.09702	Lk6	Lk6 [Source:FlyBase;Acc:FBgn0017581]
FBgn0017590	1.07192	0.784921	0.193607	0	0.310261	53.5405	90.7141	119.189	79.6859	70.8147	klg	klingon [Source:FlyBase;Acc:FBgn0017590]
FBgn0019624	254.596	250.237	279.202	265.029	195.522	203.78	180.113	156.715	224.812	138	CoVa	Cytochrome c oxidase subunit Va [Source:FlyBase;Acc:FBgn0019624]
FBgn0019637	0.223213	0.0184492	0	0.624357	0	0	0	0	0	0	Atu	Another transcription unit [Source:FlyBase;Acc:FBgn0019637]
FBgn0019643	0.0435611	0	0.182637	0	0	0	1.45925	0.201225	0	0	Dat	Dopamine N acetyltransferase [Source:FlyBase;Acc:FBgn0019643]
FBgn0019644	69.7975	97.1547	98.392	86.149	33.1839	91.055	72.8363	45.2107	73.7776	51.9784	ATPsyn-b	ATP synthase, subunit b [Source:FlyBase;Acc:FBgn0019644]
FBgn0019650	0	0.0790495	0	1.88982	0	0.057042	0.269224	0	3.13668	0	toy	twin of eyeless [Source:FlyBase;Acc:FBgn0019650]
FBgn0019662	0.207717	1.20125	0	1.19034	0.677383	0.17248	0.306513	0.490106	0	0.0731823	qm	quemao [Source:FlyBase;Acc:FBgn0019662]
FBgn0019686	0.0539922	0.721755	0.198127	0.109648	0.471026	0.251098	0.15677	0	0	0.251695	lok	loki [Source:FlyBase;Acc:FBgn0019686]
FBgn0019830	2.89954	3.50982	0	0.0661544	0	0.581258	0.984347	0	2.97715	4.333	colt	congested-like trachea [Source:FlyBase;Acc:FBgn0019830]
FBgn0019886	0.823943	0.345977	1.74323	0.373151	0.328666	2.76343	0.613594	0	0.0200088	0.386415	Letm1	LETM1 ortholog [Source:FlyBase;Acc:FBgn0019886]
FBgn0019890	3.58597	2.64797	3.1521	5.61876	0.935238	4.9462	4.24055	6.15731	5.26659	3.08419	Smg5	Smg5 [Source:FlyBase;Acc:FBgn0019890]
FBgn0019925	3.83075	5.36109	8.03994	4.4198	3.54756	9.68763	6.20764	2.22475	6.10481	3.80916	Surf4	Surfeit 4 [Source:FlyBase;Acc:FBgn0019925]
FBgn0019929	0	0	0	0	0	0.449426	0.460773	0	0.0893951	0	Ser7	Ser7 [Source:FlyBase;Acc:FBgn0019929]
FBgn0019932	0.971351	2.36959	2.66826	0.0407104	0.0448214	4.53083	1.01869	0	2.06333	0.0210787	SamDC	S-adenosylmethionine decarboxylase [Source:FlyBase;Acc:FBgn0019932]
FBgn0019936	201.309	217.502	116.56	203.756	176.052	167.919	165.6	286.418	102.735	111.371	RpS20	Ribosomal protein S20 [Source:FlyBase;Acc:FBgn0019936]
FBgn0019938	0.345343	0.838315	0.0813186	0.254809	0	0	0.00411357	2.80036	0.0359135	0.0170236	RpI1	RNA polymerase I subunit [Source:FlyBase;Acc:FBgn0019938]
FBgn0019947	8.09181	11.6054	5.23129	9.65744	0.914603	7.25034	9.008	11.3551	7.42042	8.1002	Psn	Presenilin [Source:FlyBase;Acc:FBgn0019947]
FBgn0019949	1.49337	1.8496	9.24112	0.161747	0.747937	2.74759	0.922798	0.0841308	0.254415	2.1942	Cdk9	Cyclin-dependent kinase 9 [Source:FlyBase;Acc:FBgn0019949]
FBgn0019952	0.0121491	0	0	0	0	1.00248	0.443595	0	0	0.345226	Orct	Organic cation transporter [Source:FlyBase;Acc:FBgn0019952]
FBgn0019957	21.3172	19.7925	7.38461	15.3502	9.8617	17.1291	18.0498	33.6178	5.77065	8.12977	ND42	NADH:ubiquinone reductase 42kD subunit precursor [Source:FlyBase;Acc:FBgn0019957]
FBgn0019960	2.17906	6.82347	7.41671	3.6815	3.20836	9.90045	3.57448	5.18442	3.23111	5.27955	CG6455	MICOS complex subunit MIC60 [Source:UniProtKB/TrEMBL;Acc:A0A0B4KGN2]
FBgn0019968	5.82151	4.10336	8.65538	9.36635	3.34944	20.0315	7.37939	40.6817	13.7897	9.92628	Khc-73	Kinesin heavy chain 73 [Source:FlyBase;Acc:FBgn0019968]
FBgn0019972	0.981569	2.69277	5.03145	8.87052	2.47413	3.98359	2.02433	0	6.51125	3.88254	Drice	Death related ICE-like caspase [Source:FlyBase;Acc:FBgn0019972]
FBgn0019982	2.74424	6.77204	18.0316	3.83367	1.96208	10.305	13.1258	9.5504	0.283145	6.65486	Gs1l	GS1-like [Source:FlyBase;Acc:FBgn0019982]
FBgn0019985	0.0648795	0.168232	0	0.575481	0.00765071	0.0203522	0.285169	0	0	0	mGluR	metabotropic Glutamate Receptor [Source:FlyBase;Acc:FBgn0019985]
FBgn0019990	0.14121	1.003	2.6397	1.98342	0.0607414	0.784032	0.427423	0	5.14596	0.0893486	Gcn2	Gcn2 [Source:FlyBase;Acc:FBgn0019990]
FBgn0020018	0.118017	0.662834	0	0.551755	0	0.496095	1.09775	0	0.0251694	1.74295	Ppox	Protoporphyrinogen oxidase [Source:FlyBase;Acc:FBgn0020018]
FBgn0020224	7.63819	4.41164	17.4711	17.1976	6.10929	4.83444	5.34849	25.0852	9.36353	6.3559	Cbl	Cbl proto-oncogene ortholog [Source:FlyBase;Acc:FBgn0020224]
FBgn0020235	47.7424	78.7621	61.8447	56.2193	46.9088	111.227	72.1638	140.495	80.4733	71.1115	ATPsyn-gamma	ATP synthase-gamma chain [Source:FlyBase;Acc:FBgn0020235]
FBgn0020236	4.12709	2.24343	2.27938	5.25753	0.97615	5.66819	3.09813	7.15209	3.09738	2.27901	ATPCL	ATP citrate lyase [Source:FlyBase;Acc:FBgn0020236]
FBgn0020238	261.815	299.889	338.151	314.356	139.846	371.551	362.391	567.519	354.305	283.782	14-3-3epsilon	14-3-3epsilon [Source:FlyBase;Acc:FBgn0020238]
FBgn0020248	0.0124854	0.582742	2.05393	0.931315	0.840796	0.38774	5.38049	3.88124	0.546888	0.685475	stet	stem cell tumor [Source:FlyBase;Acc:FBgn0020248]
FBgn0020249	3.91692	5.40641	6.24966	1.93514	0.231835	5.89354	1.46415	5.00674	0.0319386	0.324786	stck	steamer duck [Source:FlyBase;Acc:FBgn0020249]
FBgn0020251	4.12819	3.57033	7.838	6.17009	3.61651	12.8097	9.82615	14.5641	16.0466	11.0253	sfl	sulfateless [Source:FlyBase;Acc:FBgn0020251]
FBgn0020255	26.7791	23.8327	20.4156	27.8517	28.9371	29.6935	27.0694	21.6997	53.4487	21.2861	Ran	Ran [Source:FlyBase;Acc:FBgn0020255]
FBgn0020257	0	0.0190842	0	1.11149	0	6.34406	5.97928	6.00166	8.32058	2.93829	Ppa	Partner of paired [Source:FlyBase;Acc:FBgn0020257]
FBgn0020258	0	0	0.0221807	0	0	0	0.0448812	0.606404	0	0	ppk	pickpocket [Source:FlyBase;Acc:FBgn0020258]
FBgn0020261	1.85806	1.96294	0.755168	3.34141	1.9536	0.781047	1.3924	0.48247	0.484528	1.34077	pcm	pacman [Source:FlyBase;Acc:FBgn0020261]
FBgn0020269	6.46432	5.76873	13.9974	10.414	7.57482	13.2502	4.84436	18.3814	10.8606	5.69773	mspo	M-spondin [Source:FlyBase;Acc:FBgn0020269]
FBgn0020277	0	1.12436	0	0	0	3.36474	3.2772	0	6.82663	0.0594841	lush	lush [Source:FlyBase;Acc:FBgn0020277]
FBgn0020278	0.221304	1.17682	1.95731	1.47265	1.92441	2.39839	1.20537	0	1.40713	0.22091	loco	locomotion defects [Source:FlyBase;Acc:FBgn0020278]
FBgn0020279	6.87927	6.56442	15.8659	11.1665	6.65138	6.96989	6.56053	16.3963	5.83847	4.35651	lig	lingerer [Source:FlyBase;Acc:FBgn0020279]
FBgn0020294	0	0.274991	5.41866	1.36135	0.0108898	0.0869062	0.252451	0	0	0.0409704	ko	knockout [Source:FlyBase;Acc:FBgn0020294]
FBgn0020299	0	0	0.0433877	0	0.0128759	0.118088	0.0877922	0	0	0	stumps	stumps [Source:FlyBase;Acc:FBgn0020299]
FBgn0020304	2.78705	2.46393	7.33352	4.51997	10.4067	2.54285	1.54093	11.8864	6.96847	3.22314	drongo	drongo [Source:FlyBase;Acc:FBgn0020304]
FBgn0020305	1.23179	3.34207	1.57327	1.06017	0.606957	2.85661	0.78524	0	1.92696	0	dbe	dribble [Source:FlyBase;Acc:FBgn0020305]
FBgn0020306	2.45082	2.92966	4.64255	2.61806	2.71551	3.38088	2.30985	7.30482	3.89079	3.23995	dom	domino [Source:FlyBase;Acc:FBgn0020306]
FBgn0020307	0	0.0175725	0.010547	0	0	0	0	0	0	0	dve	defective proventriculus [Source:FlyBase;Acc:FBgn0020307]
FBgn0020309	33.7787	29.1693	103.008	69.7516	37.5875	23.6654	17.438	58.9078	16.7573	15.6653	crol	crooked legs [Source:FlyBase;Acc:FBgn0020309]
FBgn0020312	3.17552	7.7169	6.52289	5.40113	5.06919	8.33543	5.35916	26.4486	13.0319	4.04748	CG4050	Transmembrane and TPR repeat-containing protein CG4050 [Source:UniProtKB/Swiss-Prot;Acc:Q7K4B6]
FBgn0020369	25.9182	20.1447	7.39476	15.121	5.75111	12.2794	17.0783	1.34063	29.5501	10.5161	Rpt6	Regulatory particle triple-A ATPase 6 [Source:FlyBase;Acc:FBgn0020369]
FBgn0020370	1.40213	0.941772	1.45146	4.41357	0.10406	0.978839	2.15961	0.306771	3.18679	1.99497	TppII	tripeptidyl-peptidase II [Source:FlyBase;Acc:FBgn0020370]
FBgn0020372	32.4348	30.3059	39.2071	43.3291	29.926	36.8465	17.1135	30.4819	28.8632	15.733	TM4SF	Transmembrane 4 superfamily [Source:FlyBase;Acc:FBgn0020372]
FBgn0020378	0.00653601	0	0	0	0.0971131	0	0	0.426402	0	0	Sp1	Sp1 [Source:FlyBase;Acc:FBgn0020378]
FBgn0020379	0.42519	0.593359	3.34458	0.992316	0.599816	0.783558	0.12513	9.80538	1.88616	0.997365	Rfx	Rfx [Source:FlyBase;Acc:FBgn0020379]
FBgn0020381	1.40116	0	0.681749	0.378302	0	0.294414	0.436901	0	0	0	Dredd	Death related ced-3/Nedd2-like caspase [Source:FlyBase;Acc:FBgn0020381]
FBgn0020385	0.316745	0	0.649796	0.198818	0	0.250206	0	0	0	0.00735305	pug	pugilist [Source:FlyBase;Acc:FBgn0020385]
FBgn0020386	3.50333	3.20281	13.5626	10.1438	4.04746	11.98	9.35916	7.25161	6.59831	8.79504	Pdk1	Phosphoinositide-dependent kinase 1 [Source:FlyBase;Acc:FBgn0020386]
FBgn0020388	0.27767	0.997543	0.428358	3.3379	0.797398	1.95981	1.00071	0	0.632893	2.99187	Gcn5	Gcn5 ortholog [Source:FlyBase;Acc:FBgn0020388]
FBgn0020389	1.09403	1.24565	0.571963	1.72137	3.27933	1.05871	0.917164	0	0.0323331	0.748665	Papss	PAPS synthetase [Source:FlyBase;Acc:FBgn0020389]
FBgn0020391	6.50969	2.51614	3.8913	4.73495	3.33082	6.07342	6.10406	7.03528	0.733249	6.67503	Nrk	Neurospecific receptor kinase [Source:FlyBase;Acc:FBgn0020391]
FBgn0020392	2.91109	2.09296	0.157025	1.0666	0.559192	1.71068	1.70303	18.5587	2.19696	0.302425	Nmt	N-myristoyl transferase [Source:FlyBase;Acc:FBgn0020392]
FBgn0020399	0.178512	0.0787884	0	0	0	0	0	0	0	0	Mst89B	Mst89B [Source:FlyBase;Acc:FBgn0020399]
FBgn0020407	0.00915855	0.791266	0.305695	0.882843	0	0	0.194403	0	0	0	asun	asunder [Source:FlyBase;Acc:FBgn0020407]
FBgn0020412	2.62294	5.04252	12.8304	4.42849	2.4778	6.64183	5.41426	18.2505	10.0628	3.21927	JIL-1	JIL-1 [Source:FlyBase;Acc:FBgn0020412]
FBgn0020440	2.97948	2.42355	9.94831	11.3568	5.10076	5.81259	3.37731	11.003	5.42724	4.51814	Fak	Focal adhesion kinase [Source:FlyBase;Acc:FBgn0020440]
FBgn0020443	3.91927	4.22539	7.08031	4.29964	1.29827	2.03706	2.18343	0.712233	7.5559	4.38006	Elf	Ef1alpha-like factor [Source:FlyBase;Acc:FBgn0020443]
FBgn0020445	0	0	0	0.0191382	0	0	0.028738	0	0	0.048187	E23	Early gene at 23 [Source:FlyBase;Acc:FBgn0020445]
FBgn0020493	1.729	1.05261	0.654281	0.974722	1.70341	2.88201	0.50262	0.884279	2.00069	2.16981	Dad	Daughters against dpp [Source:FlyBase;Acc:FBgn0020493]
FBgn0020496	20.0823	24.4554	42.3753	35.4866	13.8986	23.7049	21.1452	34.6914	22.5336	18.609	CtBP	C-terminal Binding Protein [Source:FlyBase;Acc:FBgn0020496]
FBgn0020497	5.44984	5.20773	5.00924	13.7984	3.35358	8.74319	4.84282	4.50043	6.60517	9.67585	emb	embargoed [Source:FlyBase;Acc:FBgn0020497]
FBgn0020503	8.54612	6.17341	12.6028	10.1638	5.60711	6.73941	5.3665	6.98568	6.01233	1.01241	CLIP-190	Cytoplasmic linker protein 190 [Source:FlyBase;Acc:FBgn0020503]
FBgn0020506	0	0	0.151034	0	0	0.178849	0	0	0	0.015809	Amyrel	Amyrel [Source:FlyBase;Acc:FBgn0020506]
FBgn0020510	2.65172	4.5801	14.6978	2.64928	4.51902	4.77604	4.30635	1.6982	2.91833	5.7568	Abi	Abelson interacting protein [Source:FlyBase;Acc:FBgn0020510]
FBgn0020513	0.156665	1.06765	1.68746	3.02272	2.03481	0.708234	0.743404	0.269526	0.890528	0.0626033	ade5	ade5 [Source:FlyBase;Acc:FBgn0020513]
FBgn0020521	0	0	0	0	0	0.423981	0.14022	0.631516	0	0	pio	piopio [Source:FlyBase;Acc:FBgn0020521]
FBgn0020545	3.69802	3.13595	0	0	3.26323	4.69238	1.42318	0	0	4.02325	kraken	kraken [Source:FlyBase;Acc:FBgn0020545]
FBgn0020616	0	1.22009	1.23259	0.335787	2.67248	1.22105	0.886376	0	0	0.021966	SA	Stromalin [Source:FlyBase;Acc:FBgn0020616]
FBgn0020618	67.7473	51.3916	53.3244	57.759	30.5958	78.2019	69.3298	90.1175	95.7589	61.0551	Rack1	Receptor of activated protein kinase C 1 [Source:FlyBase;Acc:FBgn0020618]
FBgn0020620	3.9225	5.75557	7.55531	13.7439	4.42091	7.42953	7.46663	44.6516	5.74184	9.39266	RN-tre	Related to the N terminus of tre oncogene [Source:FlyBase;Acc:FBgn0020620]
FBgn0020621	0.0167913	0.742222	0.966257	0.271628	0	0.960544	0.381551	0	0.781869	0.31349	Pkn	Protein kinase related to protein kinase N [Source:FlyBase;Acc:FBgn0020621]
FBgn0020622	5.98967	1.48455	6.62551	3.36503	11.4964	3.89105	1.84462	0.806998	2.13729	4.67561	Pi3K21B	Pi3K21B [Source:FlyBase;Acc:FBgn0020622]
FBgn0020626	0	1.73164	1.75132	0.251471	0.276865	0.697742	0	0	0	0.733257	Osbp	Oxysterol binding protein [Source:FlyBase;Acc:FBgn0020626]
FBgn0020647	4.98956	3.38663	11.3743	8.49534	4.48141	11.4616	9.66572	25.9465	12.4965	13.5546	KrT95D	Krueppel target at 95D [Source:FlyBase;Acc:FBgn0020647]
FBgn0020653	5.95662	5.31499	6.63248	8.25987	2.11777	4.30757	4.00913	8.41601	2.23457	2.63634	Trxr-1	Thioredoxin reductase-1 [Source:FlyBase;Acc:FBgn0020653]
FBgn0020655	0.428925	0.32234	1.7965	3.06188	1.67323	3.53467	1.87907	13.7754	1.5624	3.78402	ArfGAP1	ADP-ribosylation factor GTPase activating protein 1 [Source:FlyBase;Acc:FBgn0020655]
FBgn0020660	13.4321	22.8426	26.8862	23.1251	5.64424	12.5864	18.4336	33.1275	14.3437	11.242	eIF-4B	Eukaryotic initiation factor 4B [Source:FlyBase;Acc:FBgn0020660]
FBgn0020762	4.74343	5.52706	14.5727	6.64161	10.9516	4.5992	5.92122	2.02152	6.87258	6.93508	Atet	ABC transporter expressed in trachea [Source:FlyBase;Acc:FBgn0020762]
FBgn0020764	2.80457	2.86212	0.123254	2.09302	3.8955	1.49602	1.68343	1.68484	0	2.9931	Alas	Aminolevulinate synthase [Source:FlyBase;Acc:FBgn0020764]
FBgn0020767	8.73878	6.94504	11.9144	15.3077	15.9166	8.96068	7.7521	24.2737	4.4264	7.16532	Spred	Sprouty-related protein with EVH-1 domain [Source:FlyBase;Acc:FBgn0020767]
FBgn0020887	1.31784	2.07395	4.34012	2.50838	1.58826	2.15981	1.93418	0	3.11387	1.03121	Su(z)12	Su(z)12 [Source:FlyBase;Acc:FBgn0020887]
FBgn0020907	0	0	0.569663	4.99037	10.0165	0	0.134479	0	1.47597	0	Scp2	Sarcoplasmic calcium-binding protein 2 [Source:FlyBase;Acc:FBgn0020907]
FBgn0020908	1.64023	0.389439	0.534269	3.0782	0.178371	0.948992	1.02499	14.6065	1.13258	0.754963	Scp1	Sarcoplasmic calcium-binding protein 1 [Source:FlyBase;Acc:FBgn0020908]
FBgn0020909	0.410986	1.39932	0	0	0	0.0552526	0.358768	0	0	0	Rtc1	Rtc1 [Source:FlyBase;Acc:FBgn0020909]
FBgn0020910	47.2879	53.9574	46.8791	91.5895	56.5617	57.3042	46.2772	38.744	62.3845	47.3557	RpL3	Ribosomal protein L3 [Source:FlyBase;Acc:FBgn0020910]
FBgn0020930	4.53019	1.01228	0.644224	1.53913	1.12054	2.39158	1.85999	0	3.84703	1.92405	Dgkepsilon	Diacyl glycerol kinase epsilon [Source:FlyBase;Acc:FBgn0020930]
FBgn0021738	0.0242635	0.0883076	0	0.546448	0	0.235235	0.0785811	0	0	0	Crg-1	Circadianly Regulated Gene [Source:FlyBase;Acc:FBgn0021738]
FBgn0021742	0	0	0	0	0	0.416423	0.130453	0	0	0	C901	C901 [Source:FlyBase;Acc:FBgn0021742]
FBgn0021750	1.25539	0.505125	0.192628	0.161352	0	3.11894	1.45349	0	0	0	Aats-ser	Seryl-tRNA synthetase [Source:FlyBase;Acc:FBgn0021750]
FBgn0021760	1.26118	1.79587	3.82768	1.74673	0.584627	1.25849	1.82175	7.15931	0.647182	1.37832	chb	chromosome bows [Source:FlyBase;Acc:FBgn0021760]
FBgn0021761	1.14052	1.83201	2.42929	0	0	0.366635	0.766241	0.851473	0.176708	0.971366	Nup154	Nucleoporin 154kD [Source:FlyBase;Acc:FBgn0021761]
FBgn0021764	5.67401	5.14943	6.86734	4.33522	4.15798	4.52236	11.0354	15.2481	6.0654	7.99683	sdk	sidekick [Source:FlyBase;Acc:FBgn0021764]
FBgn0021765	22.3981	8.04801	9.19189	2.52819	2.00412	5.8496	11.7217	0	9.80909	2.38243	scu	scully [Source:FlyBase;Acc:FBgn0021765]
FBgn0021768	7.30691	3.14229	4.86392	4.01341	4.63963	0.352634	2.95255	32.6699	1.3327	4.44699	nudC	nudC [Source:FlyBase;Acc:FBgn0021768]
FBgn0021776	0	0	0	0.0665314	0	0	0.0375651	0	0	0	mira	miranda [Source:FlyBase;Acc:FBgn0021776]
FBgn0021795	39.9549	44.3846	15.1849	28.4131	17.6061	21.6403	29.6537	15.41	34.8101	24.9874	Tapdelta	Translocon-associated protein delta [Source:FlyBase;Acc:FBgn0021795]
FBgn0021796	0.758481	0.703006	3.14712	0.574648	2.10705	0.683727	0.667615	0.0266872	0.636661	1.26985	Tor	Target of rapamycin [Source:FlyBase;Acc:FBgn0021796]
FBgn0021800	7.70317	9.80123	20.4479	20.5602	15.2886	25.0964	28.002	108.958	25.3451	19.5586	Reph	Regulator of eph expression [Source:FlyBase;Acc:FBgn0021800]
FBgn0021814	16.1819	16.4005	12.095	17.9187	5.26611	7.10845	11.6828	16.8953	6.61266	7.2079	Vps28	Vacuolar protein sorting 28 [Source:FlyBase;Acc:FBgn0021814]
FBgn0021818	0.511911	1.12395	1.03931	0.161916	0.348045	1.6259	0.293259	2.04532	0.363832	0.259492	cnk	connector enhancer of ksr [Source:FlyBase;Acc:FBgn0021818]
FBgn0021825	7.5002	4.92243	3.14256	5.15396	6.9354	14.7804	9.22469	18.4303	1.53253	4.29938	Dmn	Dynamitin [Source:FlyBase;Acc:FBgn0021825]
FBgn0021847	4.19121	2.80397	3.55873	6.15236	1.99202	4.90886	4.5972	2.28578	4.1994	1.86434	l(2)k14710	lethal (2) k14710 [Source:FlyBase;Acc:FBgn0021847]
FBgn0021856	3.26034	6.56537	3.02289	2.15341	4.16504	16.1934	4.33989	0	1.93261	2.62171	l(2)k14505	lethal (2) k14505 [Source:FlyBase;Acc:FBgn0021856]
FBgn0021872	26.1389	23.4654	40.0563	33.3672	19.2798	17.1788	26.8154	27.3804	17.3241	21.398	Xbp1	X box binding protein-1 [Source:FlyBase;Acc:FBgn0021872]
FBgn0021874	0.123376	0	1.2869	0.118929	0.0982042	0	0.107039	0	0	0	Nle	Notchless [Source:FlyBase;Acc:FBgn0021874]
FBgn0021875	0.26929	1.29176	0	0.707954	0.370771	0.589447	1.46177	0	1.70637	0.083887	Zfrp8	Zinc finger protein RP-8 [Source:FlyBase;Acc:FBgn0021875]
FBgn0021895	4.6342	10.852	9.60102	13.6301	4.82609	13.3913	7.95592	0.907446	10.8817	3.27462	ytr	yantar [Source:FlyBase;Acc:FBgn0021895]
FBgn0021906	66.5191	41.8081	56.7505	46.8136	33.9008	61.2155	34.5153	100.314	45.7477	44.9612	RFeSP	Rieske iron-sulfur protein [Source:FlyBase;Acc:FBgn0021906]
FBgn0021944	0.378265	1.32611	0	0.10418	2.79105	1.62732	1.81068	0	8.67891	4.42329	Coprox	Coproporphyrinogen oxidase [Source:FlyBase;Acc:FBgn0021944]
FBgn0021967	70.1888	88.3523	22.8335	27.8859	31.0907	105.134	90.1145	148.937	189.963	82.9456	Pdsw	Pdsw [Source:FlyBase;Acc:FBgn0021967]
FBgn0021979	14.1469	23.0569	29.4029	32.658	16.9611	17.4377	11.545	26.9826	19.6092	18.171	l(2)k09913	lethal (2) k09913 [Source:FlyBase;Acc:FBgn0021979]
FBgn0021995	0	0.140128	0.0811003	1.04546	0.0180508	0.318967	0.398344	0	0	0.0679116	Rs1	Rs1 [Source:FlyBase;Acc:FBgn0021995]
FBgn0022023	31.1805	32.9145	33.9866	30.6735	14.4733	35.0748	28.4234	65.6105	18.1419	37.469	eIF-3p40	Eukaryotic initiation factor 3 p40 subunit [Source:FlyBase;Acc:FBgn0022023]
FBgn0022027	16.4611	16.5852	16.5908	16.1916	1.01867	12.3297	17.4566	29.3564	8.166	8.95846	Vps25	Vacuolar protein sorting 25 [Source:FlyBase;Acc:FBgn0022027]
FBgn0022029	2.35909	1.24511	3.64265	1.06992	0.0803325	0.995855	2.68998	4.36444	3.57054	1.26525	l(2)k01209	lethal (2) k01209 [Source:FlyBase;Acc:FBgn0022029]
FBgn0022069	0.445704	0.458143	0	2.84919	0	1.50116	1.16938	0	0	1.33473	Nnp-1	Nnp-1 [Source:FlyBase;Acc:FBgn0022069]
FBgn0022097	62.2705	67.0063	64.6248	52.6962	33.8883	73.1743	54.2068	33.5651	45.0271	53.0563	Vha36-1	Vacuolar H[+] ATPase 36kD subunit 1 [Source:FlyBase;Acc:FBgn0022097]
FBgn0022153	0.247781	0.617394	3.34042	1.56338	1.54913	0.521478	0.873777	2.28142	0.857645	1.12878	l(2)k05819	lethal (2) k05819 [Source:FlyBase;Acc:FBgn0022153]
FBgn0022160	4.64069	5.80615	9.03811	11.9781	5.3158	5.72743	4.66128	1.24261	1.99483	2.30506	Gpo-1	Glycerophosphate oxidase-1 [Source:FlyBase;Acc:FBgn0022160]
FBgn0022213	0.806173	1.09481	2.4313	1.47453	1.78431	0.641951	0.950674	0.0690954	0.359854	0.550248	Cas	CAS/CSE1 segregation protein [Source:FlyBase;Acc:FBgn0022213]
FBgn0022224	42.8575	48.2627	19.0333	3.24022	23.4855	27.6789	40.1343	21.7693	7.7865	15.2391	ubl	ubiquitin like [Source:FlyBase;Acc:FBgn0022224]
FBgn0022238	72.6121	77.3866	165.618	117.922	67.1294	92.7559	59.6998	30.8667	98.2832	69.8785	lolal	lola like [Source:FlyBase;Acc:FBgn0022238]
FBgn0022288	0	0	0	0	0.339556	1.40008	0.771734	0	0	1.11781	l(2)09851	lethal (2) 09851 [Source:FlyBase;Acc:FBgn0022288]
FBgn0022338	0.547133	7.09342	0	1.13296	5.67767	0	2.85076	0	3.7553	1.23391	dnk	deoxyribonucleoside kinase [Source:FlyBase;Acc:FBgn0022338]
FBgn0022343	7.6737	3.59145	7.98333	5.71834	6.11066	5.88206	6.3923	0	3.63649	5.24519	CG3760	FI20107p1 [Source:UniProtKB/TrEMBL;Acc:H9XQA9]
FBgn0022344	21.455	46.1732	6.55429	21.7186	14.5247	28.5145	18.9995	4.19506	13.5922	23.982	CG10340	RE28913p [Source:UniProtKB/TrEMBL;Acc:Q9VES8]
FBgn0022349	2.47511	1.99784	5.13762	3.87083	1.70836	2.95644	4.37541	3.99202	0.189537	2.06468	CG1910	CG1910, isoform A [Source:UniProtKB/TrEMBL;Acc:Q9V9U3]
FBgn0022355	3.2839	0	0	0	0.247177	0	0.370773	0	0.372749	0	Tsf1	Transferrin 1 [Source:FlyBase;Acc:FBgn0022355]
FBgn0022359	0.394127	1.14283	0.0447456	0	2.46988	0.158958	1.19513	0	1.80224	0	Sodh-2	Sorbitol dehydrogenase-2 [Source:FlyBase;Acc:FBgn0022359]
FBgn0022361	15.9259	8.08529	12.6318	12.9981	10.2745	20.9245	11.0507	11.6306	4.77466	6.94856	Pur-alpha	Purine-rich binding protein-alpha [Source:FlyBase;Acc:FBgn0022361]
FBgn0022382	13.0151	11.0385	22.7516	19.1733	10.95	13.8875	13.274	37.6581	9.52341	13.8843	Pka-R2	cAMP-dependent protein kinase R2 [Source:FlyBase;Acc:FBgn0022382]
FBgn0022699	2.19128	1.05753	2.21652	2.2323	1.0405	1.33622	1.66352	2.28832	0.0284773	1.20645	D19B	D19B [Source:FlyBase;Acc:FBgn0022699]
FBgn0022702	0	0	0	0.212532	0.0907781	0	0	0	0	0	Cht2	Chitinase 2 [Source:FlyBase;Acc:FBgn0022702]
FBgn0022709	5.41118	2.22434	0	0.111184	0.472674	3.18413	6.75272	0	0.068211	0.939554	Adk1	Adenylate kinase-1 [Source:FlyBase;Acc:FBgn0022709]
FBgn0022710	0.0487108	0	0.0283693	0	0	0	0.0690267	0.0325642	0	0.33148	Ac13E	Adenylyl cyclase 35C [Source:FlyBase;Acc:FBgn0022710]
FBgn0022724	0.0565616	0.636584	1.21366	0	2.32111	0.159686	1.45527	0	0	1.31742	Taf8	TBP-associated factor 8 [Source:FlyBase;Acc:FBgn0022724]
FBgn0022764	2.30904	3.20395	4.62969	2.84128	4.4642	3.89834	4.543	13.3654	3.14425	2.78566	Sin3A	Sin3A [Source:FlyBase;Acc:FBgn0022764]
FBgn0022768	1.88202	1.57506	3.61857	3.10167	1.54636	2.11035	1.38751	0.782971	0.913864	1.42415	Pp2C1	Protein phosphatase 2C [Source:FlyBase;Acc:FBgn0022768]
FBgn0022772	0	0.0211287	0	0	0	0	0.0222375	0	0	0	Orc1	Origin recognition complex subunit 1 [Source:FlyBase;Acc:FBgn0022772]
FBgn0022786	1.07779	1.00584	0	0	0.992262	2.19965	2.24266	0	0	0.991618	Hira	Hira [Source:FlyBase;Acc:FBgn0022786]
FBgn0022787	1.48995	0.806553	3.7098	6.13339	0.383935	1.9777	1.74356	0.695699	0.740909	1.12784	Hel89B	Helicase 89B [Source:FlyBase;Acc:FBgn0022787]
FBgn0022800	0.344416	0.0456035	0	0.147556	0.422388	1.10201	0.132922	0.268624	0	0	Cad96Ca	Cadherin 96Ca [Source:FlyBase;Acc:FBgn0022800]
FBgn0022893	155.431	239.123	187.779	205.317	130.341	159.834	209.641	303.191	200.944	178.669	Df31	Decondensation factor 31 [Source:FlyBase;Acc:FBgn0022893]
FBgn0022935	5.91109	3.55605	2.02331	5.8129	2.8265	2.37646	1.59102	0.51891	3.09192	2.54142	D19A	D19A [Source:FlyBase;Acc:FBgn0022935]
FBgn0022936	3.25479	0.826843	0	1.99436	0	2.13698	2.41002	0	0	0.050372	CycH	Cyclin H [Source:FlyBase;Acc:FBgn0022936]
FBgn0022942	2.30905	0.458605	0.95085	4.83785	1.02413	0.972979	1.63597	5.63316	0.766398	0.0412824	Cbp80	cap binding protein 80 [Source:FlyBase;Acc:FBgn0022942]
FBgn0022943	44.6962	101.82	10.4884	40.4842	17.6796	75.845	71.8742	0	74.5092	60.1915	Cbp20	cap binding protein 20 [Source:FlyBase;Acc:FBgn0022943]
FBgn0022959	25.166	24.3555	47.4282	37.1904	23.7403	35.9336	28.7085	98.1692	41.5281	30.4888	yps	ypsilon schachtel [Source:FlyBase;Acc:FBgn0022959]
FBgn0022960	2.5499	4.66981	3.09574	3.72418	10.9973	10.4985	8.24683	33.706	6.97072	8.7616	vimar	visceral mesodermal armadillo-repeats [Source:FlyBase;Acc:FBgn0022960]
FBgn0022981	0	0.675812	1.01676	2.04673	0	0	0	0	0.0152866	0	rpk	ripped pocket [Source:FlyBase;Acc:FBgn0022981]
FBgn0022984	40.2051	28.3481	37.8714	46.1145	24.2892	27.6043	36.1278	80.2631	31.3076	17.9193	qkr58E-3	quaking related 58E-3 [Source:FlyBase;Acc:FBgn0022984]
FBgn0022985	5.45777	7.16757	11.6579	17.8692	6.81402	9.27743	4.4815	6.91603	4.86371	9.76911	qkr58E-2	quaking related 58E-2 [Source:FlyBase;Acc:FBgn0022985]
FBgn0022986	8.71377	9.75133	12.9104	15.2763	9.15105	17.0664	8.6427	28.0778	5.80282	6.25669	qkr58E-1	quaking related 58E-1 [Source:FlyBase;Acc:FBgn0022986]
FBgn0022987	7.95389	8.2634	20.0798	14.0722	14.6526	11.9393	6.95443	53.3767	4.76346	7.96219	qkr54B	quaking related 54B [Source:FlyBase;Acc:FBgn0022987]
FBgn0023000	1.24633	1.13058	2.65715	4.41286	0.228934	3.51867	1.0175	0.948211	0.955811	2.14131	mth	methuselah [Source:FlyBase;Acc:FBgn0023000]
FBgn0023023	60.884	73.4411	80.5778	52.4059	36.8433	28.1776	29.2906	17.9295	22.9215	25.6736	CRMP	Collapsin Response Mediator Protein [Source:FlyBase;Acc:FBgn0023023]
FBgn0023076	0	0	0	0	0	0.041917	0	0	0.012487	0	Clk	Clock [Source:FlyBase;Acc:FBgn0023076]
FBgn0023081	2.43637	1.57792	1.82847	0.914916	1.21416	1.32784	1.36954	0.849793	0.471132	0.816318	gek	genghis khan [Source:FlyBase;Acc:FBgn0023081]
FBgn0023083	4.93941	5.30306	12.2989	7.63498	11.677	1.85443	3.13154	0.404208	5.02836	1.93204	fray	frayed [Source:FlyBase;Acc:FBgn0023083]
FBgn0023094	5.67079	6.27037	12.4142	11.5097	10.7029	3.42165	6.6696	8.40232	8.34363	6.90037	cyc	cycle [Source:FlyBase;Acc:FBgn0023094]
FBgn0023095	0.677493	0.107387	0	0.217544	0	2.33618	3.50656	3.86606	1.38614	2.9192	caps	capricious [Source:FlyBase;Acc:FBgn0023095]
FBgn0023096	0.0540421	0	0.175697	0	0	0.0138703	0.0158005	0.00821099	0	0.0637543	btv	beethoven [Source:FlyBase;Acc:FBgn0023096]
FBgn0023097	2.59628	1.1846	8.4773	5.3568	1.61072	2.5581	1.99283	9.04534	0.477938	1.86498	bon	bonus [Source:FlyBase;Acc:FBgn0023097]
FBgn0023129	0.0160847	0	0	0	0	0	0.419016	0.403237	0	0	aay	astray [Source:FlyBase;Acc:FBgn0023129]
FBgn0023130	2.59238	3.62026	6.91385	1.94484	0.760208	1.94477	1.92442	2.69841	0.475987	3.04236	a6	a6 [Source:FlyBase;Acc:FBgn0023130]
FBgn0023143	4.55118	2.20236	8.60862	7.37814	3.65064	2.79696	3.25574	6.0515	8.12486	4.28204	Uba1	Ubiquitin activating enzyme 1 [Source:FlyBase;Acc:FBgn0023143]
FBgn0023167	8.52416	9.37605	38.1353	10.9629	4.80433	2.25725	8.77346	3.12814	3.68868	7.09287	SmD3	Small ribonucleoprotein particle protein SmD3 [Source:FlyBase;Acc:FBgn0023167]
FBgn0023169	3.17508	1.91032	7.92484	5.34017	3.72072	1.9631	2.04229	1.09148	4.12323	0.899655	AMPKalpha	AMP-activated protein kinase alpha subunit [Source:FlyBase;Acc:FBgn0023169]
FBgn0023170	2704.15	2833	1943.78	2225.71	2076.02	2008.7	1985.13	2323.67	1933.44	1864.58	RpL39	Ribosomal protein L39 [Source:FlyBase;Acc:FBgn0023170]
FBgn0023171	9.49129	10.4251	6.36526	5.68358	3.7598	6.16488	5.73502	3.7327	16.1515	3.66447	rnh1	ribonuclease H1 [Source:FlyBase;Acc:FBgn0023171]
FBgn0023172	1.06457	1.08738	4.44298	2.05257	0.535983	1.53922	2.32272	7.12047	2.02084	0.567143	RhoGEF2	Rho guanine nucleotide exchange factor 2 [Source:FlyBase;Acc:FBgn0023172]
FBgn0023174	9.5465	12.489	0	8.64303	5.26095	7.25051	11.194	19.5619	12.8513	5.43923	Prosbeta2	Proteasome beta2 subunit [Source:FlyBase;Acc:FBgn0023174]
FBgn0023175	14.0749	29.3888	20.188	14.0862	28.4927	12.8724	15.7385	40.7518	9.8283	15.6612	Prosalpha7	Proteasome alpha7 subunit [Source:FlyBase;Acc:FBgn0023175]
FBgn0023177	6.00869	12.6465	17.5634	14.5976	3.34487	5.42556	9.29562	5.13894	8.84939	8.40231	Pp4-19C	Protein phosphatase 19C [Source:FlyBase;Acc:FBgn0023177]
FBgn0023179	9.47441	9.08085	16.9741	13.4183	4.67139	9.63067	5.96146	5.87592	7.84173	6.10182	amon	amontillado [Source:FlyBase;Acc:FBgn0023179]
FBgn0023180	0.0569528	0.367625	0	0	0	0	0.961626	0	0	0	Orc6	Origin recognition complex subunit 6 [Source:FlyBase;Acc:FBgn0023180]
FBgn0023181	0	0.11974	0	0	0	2.04249	0.392635	0	0	0	Orc4	Origin recognition complex subunit 4 [Source:FlyBase;Acc:FBgn0023181]
FBgn0023197	0	0	0	0	0	0	0.303738	0	0	0.0314247	Jon74E	Jonah 74E [Source:FlyBase;Acc:FBgn0023197]
FBgn0023212	11.1753	10.7563	5.73865	9.28095	3.37564	6.61347	8.64663	5.1722	5.61192	3.68988	EloB	Elongin B [Source:FlyBase;Acc:FBgn0023212]
FBgn0023213	23.8319	17.8512	39.226	31.3805	13.3025	24.696	16.6059	33.4894	27.7407	19.2892	eIF4G	eukaryotic translation initiation factor 4G [Source:FlyBase;Acc:FBgn0023213]
FBgn0023214	0.580918	0.424182	0	0	0	0	0	0.171334	0	0.579884	edl	ETS-domain lacking [Source:FlyBase;Acc:FBgn0023214]
FBgn0023215	5.07958	4.05556	10.5458	6.82388	4.09637	5.24953	6.85105	17.6356	7.82838	5.62996	Mnt	Mnt [Source:FlyBase;Acc:FBgn0023215]
FBgn0023216	1.1871	0.165305	0.981719	2.24643	0.0961727	1.38512	0.397289	0	0.137398	0.664653	Parg	Poly(ADP-ribose) glycohydrolase [Source:FlyBase;Acc:FBgn0023216]
FBgn0023388	11.1939	8.14885	17.7616	13.4298	6.0742	10.4214	9.26246	16.2959	10.7012	9.31203	Dap160	Dynamin associated protein 160 [Source:FlyBase;Acc:FBgn0023388]
FBgn0023407	6.69313	5.09325	17.3355	9.0896	6.28426	4.00356	6.50424	11.3032	6.79085	3.16222	B4	B4 [Source:FlyBase;Acc:FBgn0023407]
FBgn0023416	2.59604	2.77764	4.56919	4.21875	1.32709	4.65635	3.5422	11.4913	4.36634	1.79375	Ac3	Ac3 [Source:FlyBase;Acc:FBgn0023416]
FBgn0023441	0.261766	0.147981	0.0594837	0.321084	2.37049	0.162136	0	0	0.77401	0	fus	fusilli [Source:FlyBase;Acc:FBgn0023441]
FBgn0023458	0.788372	0.617686	0.788801	1.77505	1.18382	1.36641	1.47387	2.95751	0.439538	0.318939	Rbcn-3A	Rabconnectin-3A [Source:FlyBase;Acc:FBgn0023458]
FBgn0023477	1.25858	0.0943279	0	1.64814	0.100809	7.30762	6.57566	0.238128	4.80073	2.39415	Tal	Tal [Source:FlyBase;Acc:FBgn0023477]
FBgn0023479	3.29322	3.83363	8.13486	1.7519	1.61406	2.88898	2.5208	7.80272	2.90184	2.50089	Tequila	Tequila [Source:FlyBase;Acc:FBgn0023479]
FBgn0023506	0.0695555	3.16315	0	5.66902	0.826773	2.86701	0.255016	0	3.98412	2.90224	Es2	Es2 [Source:FlyBase;Acc:FBgn0023506]
FBgn0023507	0	0	0	0	0	1.18918	0	0	0	0.331275	CG3835	CG3835, isoform A [Source:UniProtKB/TrEMBL;Acc:Q7K511]
FBgn0023508	0.965273	0.479288	5.7236	2.6501	0.298255	0.017248	0.999325	2.28129	5.47662	0.173307	Ocrl	Oculocerebrorenal syndrome of Lowe ortholog (H. sapiens) [Source:FlyBase;Acc:FBgn0023508]
FBgn0023509	0	0.0385607	1.39669	0.593535	1.08664	0.379766	0.449009	0	0	0.0832314	mip130	Myb-interacting protein 130 [Source:FlyBase;Acc:FBgn0023509]
FBgn0023510	5.167	2.08344	7.74961	7.93607	2.91249	2.81326	2.26382	8.0131	3.93139	2.68854	Rbcn-3B	Rabconnectin-3B [Source:FlyBase;Acc:FBgn0023510]
FBgn0023511	0.768948	0.523936	0.594581	0.961599	0.294084	0.695298	0.459877	0	0	1.54597	Edem1	Edem1 [Source:FlyBase;Acc:FBgn0023511]
FBgn0023512	0	0.788673	1.82371	0.0193812	0.242209	1.2204	0.42876	0	0.982299	0	eIF2B-epsilon	eIF2B-epsilon [Source:FlyBase;Acc:FBgn0023512]
FBgn0023513	0.274075	0.220332	1.44688	0.817739	0	1.38171	0.837384	0	0.274839	1.02269	CG14803	Protein MMS22-like [Source:UniProtKB/Swiss-Prot;Acc:O46089]
FBgn0023514	3.35125	4.43083	3.14224	0.191723	0.151734	1.40247	3.00014	0.854477	0.0239254	1.80041	CG14805	FI20216p1 [Source:UniProtKB/TrEMBL;Acc:Q9W550]
FBgn0023515	0.308633	0.593287	2.14016	2.06322	0.027296	1.40866	0.161298	0	0.0663622	0.327892	CG14814	Uncharacterized protein, isoform B [Source:UniProtKB/TrEMBL;Acc:Q9W554]
FBgn0023516	0.609408	0.367854	0	0.483776	0	0.877115	0.7955	0.239648	0.221438	0.0238558	Pex5	Peroxin 5 [Source:FlyBase;Acc:FBgn0023516]
FBgn0023517	4.59671	3.71299	1.61505	1.81905	4.12249	4.30308	1.05409	14.3632	15.6104	0	Pgam5	Phosphoglycerate mutase 5 [Source:FlyBase;Acc:FBgn0023517]
FBgn0023518	0.312906	0.203729	1.39829	0.370908	0.165364	0.431933	0.45239	1.61488	0.450301	0.439366	trr	trithorax-related [Source:FlyBase;Acc:FBgn0023518]
FBgn0023519	4.56294	15.3672	11.6381	10.2284	1.69165	5.53133	5.15834	0	8.95105	2.59404	mRpL16	mitochondrial ribosomal protein L16 [Source:FlyBase;Acc:FBgn0023519]
FBgn0023520	5.28489	5.67824	9.59663	13.3004	6.64287	5.16797	5.26047	3.89821	4.19473	3.94924	CG3857	Protein SMG9 [Source:UniProtKB/Swiss-Prot;Acc:O46080]
FBgn0023521	4.35339	4.25153	0.229374	3.52411	1.42947	6.9941	5.47664	0	6.96948	3.57735	CG3587	CG3587 [Source:UniProtKB/TrEMBL;Acc:O46079]
FBgn0023522	2.68682	1.27884	1.40246	1.16473	5.90552	4.17428	1.05841	6.45677	4.55328	2.04724	CG11596	LD23570p [Source:UniProtKB/TrEMBL;Acc:E4NKI7]
FBgn0023524	3.53679	4.40704	6.99008	1.39314	0.0379037	3.50646	1.26152	9.12616	2.47417	0.942185	CG3078	CG3078, isoform B [Source:UniProtKB/TrEMBL;Acc:X2JDK7]
FBgn0023525	0.762534	1.49082	0.0568124	0.0918811	2.42783	3.36376	2.43707	0	0	1.68886	CG3191	CG3191, isoform A [Source:UniProtKB/TrEMBL;Acc:Q95R34]
FBgn0023526	8.11136	8.33558	18.5751	16.7937	13.7505	12.4602	10.3478	28.293	16.9105	7.61668	CG2865	CG2865, isoform A [Source:UniProtKB/TrEMBL;Acc:O46070]
FBgn0023527	0	0.0713864	0	3.01566	0	0.45674	0.310517	0	0	0	CG3071	CG3071 [Source:UniProtKB/TrEMBL;Acc:Q9W4Z9]
FBgn0023528	11.1047	9.53364	26.766	28.0335	18.117	13.2665	13.9504	53.3687	11.1124	15.567	CG2924	CG2924, isoform A [Source:UniProtKB/TrEMBL;Acc:Q29R09]
FBgn0023529	5.5072	4.26764	13.2961	7.16123	7.52695	5.4956	4.19086	6.54636	4.07415	3.16987	CG2918	CG2918, isoform A [Source:UniProtKB/TrEMBL;Acc:O46067]
FBgn0023530	11.4251	2.25606	0	0	1.20554	2.70585	4.17838	0	1.79407	0	CG3740	CG3740 [Source:UniProtKB/TrEMBL;Acc:Q9W569]
FBgn0023531	14.1436	14.6861	32.597	25.4643	8.35906	23.4276	21.4462	40.2355	18.3926	13.7661	CG32809	Uncharacterized protein, isoform G [Source:UniProtKB/TrEMBL;Acc:M9NEP4]
FBgn0023534	86.8263	78.7038	34.6987	67.4318	64.5467	166.694	98.2947	72.6159	58.965	78.3802	CG17778	RH02374p [Source:UniProtKB/TrEMBL;Acc:Q8MYW2]
FBgn0023535	0.0833995	0	0	0	0	1.36499	0.720956	0	0	0	arg	arginase [Source:FlyBase;Acc:FBgn0023535]
FBgn0023536	0.609009	0.546256	2.20137	1.00368	1.25098	0.166391	0.665963	0	0	0.627535	CG3156	CG3156 [Source:UniProtKB/TrEMBL;Acc:Q8SWW9]
FBgn0023537	0.0242074	0.181485	0.490571	0.490033	1.05334	4.13475	1.14445	0	2.67124	0.679947	CG17896	Probable methylmalonate-semialdehyde dehydrogenase [acylating], mitochondrial [Source:UniProtKB/Swiss-Prot;Acc:Q7KW39]
FBgn0023540	3.37112	3.01727	2.5871	1.39468	0.460656	2.85931	1.77286	3.11934	0	0.924324	CG3630	CG3630, isoform A [Source:UniProtKB/TrEMBL;Acc:O46052]
FBgn0023541	0.114699	0.315147	0.537532	0.151328	0.1015	0.164101	0	0.503199	0.048308	1.38884	Cyp4d14	Cyp4d14 [Source:FlyBase;Acc:FBgn0023541]
FBgn0023542	3.57204	0.637446	0.954979	1.36731	0	1.22106	1.42156	0.133889	0	1.98587	Nmd3	Nonsense-mediated mRNA 3 [Source:FlyBase;Acc:FBgn0023542]
FBgn0023545	0.995045	1.33033	2.21417	3.41816	1.00853	2.44451	1.12613	0.108332	0.14559	0.517667	CG4406	Putative GPI-anchor transamidase [Source:UniProtKB/Swiss-Prot;Acc:Q8T4E1]
FBgn0024150	0	0.0397871	0	0	0	1.3856	0.515959	4.05105	3.82057	0.326612	Ac78C	Adenylyl cyclase 78C [Source:FlyBase;Acc:FBgn0024150]
FBgn0024179	4.50888	3.80778	2.1237	9.7331	2.45598	4.57038	3.6595	8.8712	4.45556	1.29251	wit	wishful thinking [Source:FlyBase;Acc:FBgn0024179]
FBgn0024182	0	0.00616458	0	0	0	0	0.0516325	0	0	0	waw	waclaw [Source:FlyBase;Acc:FBgn0024182]
FBgn0024183	28.6026	24.1333	31.2049	33.679	18.2258	21.132	18.7902	43.6639	32.5089	12.9476	vig	vasa intronic gene [Source:FlyBase;Acc:FBgn0024183]
FBgn0024187	6.55822	3.76082	9.99219	8.00517	6.08573	6.44012	4.74285	9.62502	6.39713	2.31274	syd	sunday driver [Source:FlyBase;Acc:FBgn0024187]
FBgn0024188	65.4852	34.4905	14.9277	42.4619	13.681	31.9224	44.0998	40.2573	91.0877	43.5668	san	separation anxiety [Source:FlyBase;Acc:FBgn0024188]
FBgn0024189	0.236905	0.0297172	0.136744	0.341342	0.00529312	0.492814	0.38316	0.150037	0.23947	0.263864	sns	sticks and stones [Source:FlyBase;Acc:FBgn0024189]
FBgn0024191	0.902929	0.524466	0.484847	0.0333832	1.13938	0	0.801929	0	0	0.341041	sip1	septin interacting protein 1 [Source:FlyBase;Acc:FBgn0024191]
FBgn0024194	0	0	0	0	0	0.726771	0.265045	0	0	0	rasp	rasp [Source:FlyBase;Acc:FBgn0024194]
FBgn0024196	216.327	201.661	56.3252	51.8289	67.5949	195.495	149.626	54.9562	77.6052	92.8526	robl	roadblock [Source:FlyBase;Acc:FBgn0024196]
FBgn0024227	0.352692	0.65671	0	0.254985	0.374312	0	0.510435	0	0	0	aurB	aurora B [Source:FlyBase;Acc:FBgn0024227]
FBgn0024230	12.6935	10.5944	0.384851	4.55489	0.249185	6.13158	5.19619	0	9.93834	4.42383	Hs2st	Heparan sulfate 2-O-sulfotransferase [Source:FlyBase;Acc:FBgn0024230]
FBgn0024232	0.773026	0.671474	2.78827	3.07156	0.18336	1.34093	0.684791	3.34806	0.839071	0.862634	gprs	gprs [Source:FlyBase;Acc:FBgn0024232]
FBgn0024234	1.7157	0	0	0	3.09387	0.642984	0.380882	0	0	0	gbb	glass bottom boat [Source:FlyBase;Acc:FBgn0024234]
FBgn0024236	0.592472	1.79661	1.07202	1.46467	0.247025	2.76292	0.623574	0.86572	1.08726	1.2366	foi	fear-of-intimacy [Source:FlyBase;Acc:FBgn0024236]
FBgn0024238	2.04047	1.59629	5.25586	2.5804	0.665643	1.0373	1.69019	2.20405	1.75748	1.97789	Fim	Fimbrin [Source:FlyBase;Acc:FBgn0024238]
FBgn0024245	10.5182	13.7986	12.939	30.8074	10.075	10.8718	8.26992	1.77087	8.85274	15.6159	dnt	doughnut on 2 [Source:FlyBase;Acc:FBgn0024245]
FBgn0024248	2.11015	1.55368	0.0180198	1.48629	2.08558	0.550712	1.10654	8.80224	0.0891326	0.339511	chico	chico [Source:FlyBase;Acc:FBgn0024248]
FBgn0024250	2.60064	0.611012	3.1835	1.17258	0.400653	2.86868	1.41994	0.839592	0.176665	1.248	brk	brinker [Source:FlyBase;Acc:FBgn0024250]
FBgn0024251	0.952351	0.0842773	0.143201	0.0117887	0.566624	0.824277	0.360442	0	0.312099	0.405305	bbx	bobby sox [Source:FlyBase;Acc:FBgn0024251]
FBgn0024273	1.55488	4.78668	4.47029	2.85413	6.29013	2.60804	2.63859	6.24644	1.43302	4.05375	WASp	WASp [Source:FlyBase;Acc:FBgn0024273]
FBgn0024277	0.627189	2.22442	8.0106	4.02232	2.24142	3.16195	5.70555	21.8522	4.65777	2.22958	trio	trio [Source:FlyBase;Acc:FBgn0024277]
FBgn0024285	5.10069	5.98725	7.16108	1.15814	1.8315	10.2684	5.31123	0	5.77782	8.55869	Srp54	Srp54 [Source:FlyBase;Acc:FBgn0024285]
FBgn0024291	6.50039	4.32459	8.11864	0.758174	2.08684	0.741855	2.76763	7.77114	1.35429	1.66261	Sir2	Sir2 [Source:FlyBase;Acc:FBgn0024291]
FBgn0024314	1.3708	0.550867	2.88067	2.40561	0.920429	1.46369	1.37347	3.7009	0.695779	2.01107	Plap	Phospholipase A2 activator protein [Source:FlyBase;Acc:FBgn0024314]
FBgn0024320	4.16304	2.12306	3.55677	1.12596	0.115519	1.76697	0.879691	3.98397	1.03607	0.487561	Npc1a	Niemann-Pick type C-1a [Source:FlyBase;Acc:FBgn0024320]
FBgn0024321	0.506734	1.68817	4.78598	3.51044	0.433397	2.25427	0.848038	0	1.45444	2.14439	NK7.1	NK7.1 [Source:FlyBase;Acc:FBgn0024321]
FBgn0024326	6.01931	7.07956	13.5092	11.4102	2.56959	8.63936	6.2051	6.30975	12.4351	1.64481	Mkk4	MAP kinase kinase 4 [Source:FlyBase;Acc:FBgn0024326]
FBgn0024329	0.201888	0.327326	0.0884077	0.0556031	0	0	0.174912	2.76819	0	0.0534667	Mekk1	Mekk1 [Source:FlyBase;Acc:FBgn0024329]
FBgn0024330	6.88168	4.07729	3.91109	9.02369	1.78893	3.47436	3.16367	8.27661	0.656498	1.54739	MED6	Mediator complex subunit 6 [Source:FlyBase;Acc:FBgn0024330]
FBgn0024352	20.4143	20.5147	23.1318	29.9149	14.5834	17.3984	19.047	37.6487	24.4791	25.1278	Hop	Hsp70/Hsp90 organizing protein homolog [Source:FlyBase;Acc:FBgn0024352]
FBgn0024360	1.35426	4.50712	4.30794	0.705647	0	3.41739	0.712478	8.16653	0.770784	0.0913412	CG11418	Poly(A) RNA polymerase, mitochondrial [Source:UniProtKB/Swiss-Prot;Acc:O46102]
FBgn0024362	2.65046	2.69222	15.6285	4.35143	1.64555	3.67461	3.57901	15.425	1.35552	1.85142	CG11412	N-alpha-acetyltransferase 30 [Source:UniProtKB/Swiss-Prot;Acc:Q95RC0]
FBgn0024364	0	0	0	1.14895	0	0.604655	0.071875	0	2.0237	1.04107	CG11417	EG:8D8.4 protein [Source:UniProtKB/TrEMBL;Acc:O46307]
FBgn0024365	0.979053	0	0	1.97481	0	1.11842	0.775357	0	0	0.203371	CG12773	EG:8D8.3 protein [Source:UniProtKB/TrEMBL;Acc:O46100]
FBgn0024371	3.26483	8.93253	9.92838	3.75731	8.1674	12.9795	14.4644	3.50777	5.58445	10.9577	E2f2	E2F transcription factor 2 [Source:FlyBase;Acc:FBgn0024371]
FBgn0024432	57.6984	48.8963	42.8528	41.7928	21.8119	62.6364	35.3146	83.2018	45.88	42.1184	Dlc90F	Dynein light chain 90F [Source:FlyBase;Acc:FBgn0024432]
FBgn0024491	29.0199	44.7797	24.7767	37.6539	16.1277	36.813	21.7061	69.0453	13.6264	11.8401	Bin1	Bicoid interacting protein 1 [Source:FlyBase;Acc:FBgn0024491]
FBgn0024509	5.30707	6.0178	6.90972	1.0159	0.559244	12.0077	7.46279	0	2.12424	1.5968	Sec13	Sec13 ortholog (S. cerevisiae) [Source:FlyBase;Acc:FBgn0024509]
FBgn0024510	0.145076	0.552363	0.0263053	0.587291	0.174757	1.60452	0.641838	1.84375	1.94397	0.973573	dlt	discs lost [Source:FlyBase;Acc:FBgn0024510]
FBgn0024542	1.76491	10.2784	4.22401	5.18113	1.70167	10.6816	6.69527	2.14421	0.171822	3.68039	Neos	Neosin [Source:FlyBase;Acc:FBgn0024542]
FBgn0024555	9.96634	5.26657	14.8829	12.5421	5.0302	12.3121	6.27863	27.2251	8.78072	6.37721	flfl	falafel [Source:FlyBase;Acc:FBgn0024555]
FBgn0024556	8.60767	4.6284	7.00751	9.6061	5.55545	6.04571	4.49684	0	0.353691	5.23923	EfTuM	Elongation factor Tu mitochondrial [Source:FlyBase;Acc:FBgn0024556]
FBgn0024558	0	0	0	0	0.447449	0	0.0225989	0	0	0	Dph5	Diphthamide methyltransferase [Source:FlyBase;Acc:FBgn0024558]
FBgn0024689	0	0.629818	0.616715	1.75467	0.915095	3.31384	0.610076	8.64641	3.2119	1.78836	fws	four way stop [Source:FlyBase;Acc:FBgn0024689]
FBgn0024698	0.837692	0.201813	2.37099	0.0373139	0.779694	0.784116	0.237716	1.7225	0	0.24147	Cpsf160	Cleavage and polyadenylation specificity factor 160 [Source:FlyBase;Acc:FBgn0024698]
FBgn0024728	11.284	12.2748	15.3477	13.1475	5.64083	16.3897	8.57678	18.3436	14.5758	9.00736	Slip1	Slip1 [Source:FlyBase;Acc:FBgn0024728]
FBgn0024732	9.23452	8.51542	9.43564	7.12966	6.97746	6.74674	5.28954	8.56624	4.5907	2.82802	Drep-1	DNA fragmentation factor-related protein 1 [Source:FlyBase;Acc:FBgn0024732]
FBgn0024733	346.988	376.448	226.036	255.85	199.917	308.705	241.258	286.073	253.944	252.695	RpL10	Ribosomal protein L10 [Source:FlyBase;Acc:FBgn0024733]
FBgn0024734	19.1557	20.9816	35.7527	19.0617	14.9298	19.8719	11.9226	50.3449	35.8619	18.5456	PRL-1	PRL-1 [Source:FlyBase;Acc:FBgn0024734]
FBgn0024754	30.9282	27.9015	52.3646	55.1363	26.1258	31.1658	33.079	43.8836	33.8262	37.3857	Flo1	Flotillin 1 [Source:FlyBase;Acc:FBgn0024754]
FBgn0024804	22.0404	28.4424	22.0519	21.1923	6.32038	11.6026	18.4253	32.1416	8.94401	13.1257	Dbp80	Dead box protein 80 [Source:FlyBase;Acc:FBgn0024804]
FBgn0024806	3.63541	4.30439	9.42607	9.22581	4.61764	6.62011	4.71404	8.63507	4.6498	3.36239	DIP2	DISCO Interacting Protein 2 [Source:FlyBase;Acc:FBgn0024806]
FBgn0024807	9.51876	10.4947	30.8199	19.4223	9.95247	13.0304	17.8488	45.0507	9.79235	11.2646	DIP1	DISCO Interacting Protein 1 [Source:FlyBase;Acc:FBgn0024807]
FBgn0024811	59.4635	57.731	106.246	54.7509	61.1271	37.1324	57.0812	20.175	42.2389	37.6609	Crk	Crk [Source:FlyBase;Acc:FBgn0024811]
FBgn0024814	35.24	42.6928	35.5423	50.5609	21.2941	44.6707	46.981	13.2449	34.6853	30.7461	Clc	Clathrin light chain [Source:FlyBase;Acc:FBgn0024814]
FBgn0024833	0.43747	1.84635	1.5416	5.7187	2.13406	4.66915	3.03164	13.8156	1.15157	2.97496	AP-1mu	Adaptor Protein complex 1, mu subunit [Source:FlyBase;Acc:FBgn0024833]
FBgn0024836	8.90578	11.4452	26.9191	16.6383	9.94349	10.3238	10.876	19.3849	11.5627	7.74469	stan	starry night [Source:FlyBase;Acc:FBgn0024836]
FBgn0024841	13.5382	15.8496	23.9242	11.9245	11.3721	8.17161	9.01412	49.4456	4.1783	9.75777	Pcd	pterin-4a-carbinolamine dehydratase [Source:FlyBase;Acc:FBgn0024841]
FBgn0024846	7.62953	1.85002	2.14085	0.328247	0.272284	6.10915	5.57859	0	1.71175	4.69921	p38b	p38b MAP kinase [Source:FlyBase;Acc:FBgn0024846]
FBgn0024887	8.73811	4.16044	6.40074	7.02204	1.66964	5.55188	3.92669	0	0	2.1337	kin17	kin17 [Source:FlyBase;Acc:FBgn0024887]
FBgn0024889	12.6331	5.07934	4.54631	3.33165	3.68917	8.27164	5.59616	15.9349	9.52047	10.2511	Kap-alpha1	karyopherin alpha1 [Source:FlyBase;Acc:FBgn0024889]
FBgn0024897	0	0.0540888	2.02577	0.441029	0.0693665	0.215281	0.409901	0	0	0	b6	b6 [Source:FlyBase;Acc:FBgn0024897]
FBgn0024909	0.531314	1.99509	0	0.192061	0.760204	2.80229	1.0573	0	0.335664	1.17675	Taf7	TBP-associated factor 7 [Source:FlyBase;Acc:FBgn0024909]
FBgn0024913	11.7081	11.1788	18.5614	15.9258	10.6634	11.9751	10.1934	12.3078	10.1867	10.8705	Actbeta	Activin-beta [Source:FlyBase;Acc:FBgn0024913]
FBgn0024920	3.03439	0.229957	0.0486988	0.088261	0.148448	0.876218	0.738558	13.4123	0.113986	0.526263	Ts	Ts [Source:FlyBase;Acc:FBgn0024920]
FBgn0024921	12.381	15.8339	31.3116	23.6559	17.3241	16.4658	12.1279	47.7912	17.5348	13.9271	Trn	Transportin [Source:FlyBase;Acc:FBgn0024921]
FBgn0024941	6.72155	4.07976	15.3329	15.9467	7.32096	6.90153	8.02982	29.5304	9.97525	7.21486	RSG7	Regulator of G-protein signalling 7 [Source:FlyBase;Acc:FBgn0024941]
FBgn0024943	0	0.00532437	0	0	0	0.302738	0	0	0	0	PIP82	PIP82 [Source:FlyBase;Acc:FBgn0024943]
FBgn0024944	0	0	0	0	0	5.65267	5.72718	19.2986	16.3317	4.86294	Oamb	Octopamine receptor in mushroom bodies [Source:FlyBase;Acc:FBgn0024944]
FBgn0024945	2.19094	4.73544	10.063	1.83245	3.18011	3.04728	4.5853	0.323094	0	0.916628	NitFhit	Nitrilase and fragile histidine triad fusion protein [Source:FlyBase;Acc:FBgn0024945]
FBgn0024947	6.63983	5.80362	8.06448	7.37569	4.56894	10.2649	7.19817	10.2893	1.79438	7.88031	NTPase	NTPase [Source:FlyBase;Acc:FBgn0024947]
FBgn0024956	0	2.333	0	0	1.54132	2.23097	2.22548	0.856668	1.83501	0	Mat1	Menage a trois 1 ortholog (H. sapiens) [Source:FlyBase;Acc:FBgn0024956]
FBgn0024957	0.0621068	0.940558	0.499744	0.419078	0	3.28766	0.868882	0	0.823972	0.805951	Irp-1B	Iron regulatory protein 1B [Source:FlyBase;Acc:FBgn0024957]
FBgn0024958	1.20418	1.16054	0	2.70743	0.663895	1.01549	0.724264	0.0784114	1.3832	0	Irp-1A	Iron regulatory protein 1A [Source:FlyBase;Acc:FBgn0024958]
FBgn0024963	29.3516	22.2416	79.942	32.0836	19.4529	26.9671	18.3728	63.8788	18.9968	13.7683	GluClalpha	GluClalpha [Source:FlyBase;Acc:FBgn0024963]
FBgn0024973	0.615003	1.22147	0.112789	3.9948	0.562328	1.20205	2.76605	1.66039	0.462258	0.3589	CG2701	CG2701 [Source:UniProtKB/TrEMBL;Acc:O76912]
FBgn0024975	0	0.481033	0	1.75911	0	0.374993	0.544866	0	0	1.7829	CG2712	CG2712 [Source:UniProtKB/TrEMBL;Acc:Q960Q9]
FBgn0024980	0	0	0	0	0	0	0	0.655188	0	0.197139	Syx4	Syntaxin 4 [Source:FlyBase;Acc:FBgn0024980]
FBgn0024983	0	1.36304	0.549965	1.61216	0	0.122107	1.33819	0	0	1.52555	CG4293	CG4293, isoform A [Source:UniProtKB/TrEMBL;Acc:O76896]
FBgn0024985	4.72663	2.41397	12.63	8.3537	5.53833	7.41961	4.07478	6.98656	6.19454	3.8778	CG11448	Uncharacterized protein, isoform C [Source:UniProtKB/TrEMBL;Acc:M9PGM0]
FBgn0024986	1.66264	10.2931	0	3.27362	0	9.18827	1.97962	0	4.52935	5.79122	CG3719	CG3719 [Source:UniProtKB/TrEMBL;Acc:O76877]
FBgn0024987	6.36016	3.84106	13.0181	11.4295	3.64714	4.61779	5.95239	32.278	5.53215	3.17016	ssx	sister-of-Sex-lethal [Source:FlyBase;Acc:FBgn0024987]
FBgn0024992	0.385107	1.27233	0.123598	1.12796	0.61307	0.0418171	0.628803	0	0.124767	0.00739272	CG2658	CG2658, isoform A [Source:UniProtKB/TrEMBL;Acc:Q9W4W8]
FBgn0024993	1.65685	0.205042	0.938979	0	0	0.268391	0.882232	0	0.297433	3.11801	CG2662	CG2662, isoform A [Source:UniProtKB/TrEMBL;Acc:Q9W4W7]
FBgn0024994	2.7778	0	0.0278265	0.090006	0	1.58165	1.41889	0	0	0.326218	Csat	Csat [Source:FlyBase;Acc:FBgn0024994]
FBgn0024995	0	0	0	0	0	0.124733	0.980434	0	0	0.243766	CG2680	CG2680 [Source:UniProtKB/TrEMBL;Acc:Q9W4W5]
FBgn0024996	13.0629	6.14475	0.0443014	5.33773	1.93262	8.97067	4.41034	11.18	0.970437	4.22805	eIF2B-beta	eIF2B-beta [Source:FlyBase;Acc:FBgn0024996]
FBgn0024998	6.28654	1.51271	4.61171	0.18646	0.23095	0.614365	1.83131	2.06093	0.224039	0.494787	CG2685	CG2685 [Source:UniProtKB/TrEMBL;Acc:O76861]
FBgn0025109	2.16933	0.797672	0.335975	4.29499	0	5.99268	2.81447	0	7.33591	0.653943	Bem46	Bem46 [Source:FlyBase;Acc:FBgn0025109]
FBgn0025111	0.323897	1.6689	5.59879	0.195146	1.50396	0.0571541	0.214851	0	0	0.020181	Ant2	Adenine nucleotide translocase 2 [Source:FlyBase;Acc:FBgn0025111]
FBgn0025185	3.64428	0.896022	3.12898	0.0225911	1.54209	0.661648	1.62805	19.0359	1.89516	0.432792	az2	az2 [Source:FlyBase;Acc:FBgn0025185]
FBgn0025186	14.5738	10.9305	16.5814	19.0622	14.7782	12.9145	11.059	41.5683	12.446	6.09327	ari-2	ariadne 2 [Source:FlyBase;Acc:FBgn0025186]
FBgn0025286	223.226	273.027	147.073	151.137	93.2798	197.247	219.721	179.716	131.938	132.111	RpL31	Ribosomal protein L31 [Source:FlyBase;Acc:FBgn0025286]
FBgn0025335	0.843212	0	0	0.203205	0.447449	3.27329	0.101695	0	0	0.350713	CG4585	Ceramide phosphoethanolamine synthase [Source:UniProtKB/Swiss-Prot;Acc:O77475]
FBgn0025336	0.740102	6.22774	5.23155	3.14637	2.89645	3.51124	2.49391	0	8.21812	0.751894	CG4882	CG4882, isoform A [Source:UniProtKB/TrEMBL;Acc:O77477]
FBgn0025352	1.36337	1.59731	0.693923	5.37504	0	1.29745	3.87238	0.384035	0	2.29372	Thiolase	Thiolase [Source:FlyBase;Acc:FBgn0025352]
FBgn0025355	0.0116747	0.446359	0.173965	1.086	0.0495615	0.164802	0.287237	1.03902	0.0147513	0.0524428	SuUR	Suppressor of Under-Replication [Source:FlyBase;Acc:FBgn0025355]
FBgn0025360	0.117146	0.00969444	0.093098	0	0	0	0	0	0	0	Optix	Optix [Source:FlyBase;Acc:FBgn0025360]
FBgn0025366	28.6547	40.3768	27.8108	28.7815	15.4359	37.4261	25.8595	28.7095	29.6889	14.8257	Ip259	Intronic Protein 259 [Source:FlyBase;Acc:FBgn0025366]
FBgn0025373	4.32952	5.2274	4.68254	2.51343	1.87815	1.67303	2.02525	0	0.741627	3.33947	Fpps	Farnesyl pyrophosphate synthase [Source:FlyBase;Acc:FBgn0025373]
FBgn0025381	0.560807	2.48738	11.6489	3.91946	0.119206	3.13936	1.75561	5.57536	0.151382	5.61726	rush	rush hour [Source:FlyBase;Acc:FBgn0025381]
FBgn0025382	0.32143	0.653015	2.38897	3.07882	0.861809	0.143285	0.408061	1.5268	0	1.14833	Rab27	Rab27 [Source:FlyBase;Acc:FBgn0025382]
FBgn0025387	0	0.0509029	0	0	0	0.0845946	0.0245111	0	0	0	CG12184	Uncharacterized protein, isoform B [Source:UniProtKB/TrEMBL;Acc:M9PJ28]
FBgn0025388	0.169625	0.149472	0.0775474	0.41123	1.37796	0.514674	0.381464	0.278996	0.132804	0.134234	CG12179	LD15043p [Source:UniProtKB/TrEMBL;Acc:Q5BI31]
FBgn0025390	0.645112	0.0632207	0.0809498	0.155465	0.450432	1.01849	0.481976	0	0	0.207594	Mur2B	Mucin related 2B [Source:FlyBase;Acc:FBgn0025390]
FBgn0025391	31.9683	25.3921	70.8882	34.7781	20.6164	48.0668	42.2294	128.873	28.1155	24.6285	Scgdelta	Sarcoglycan delta [Source:FlyBase;Acc:FBgn0025391]
FBgn0025393	2.17762	0	0	0	0	56.1706	17.9473	22.1825	44.6907	28.4969	CG14795	NA
FBgn0025394	8.94581	3.99688	10.8584	12.0633	13.5235	8.02766	5.60481	16.8711	1.70201	5.8638	inc	insomniac [Source:FlyBase;Acc:FBgn0025394]
FBgn0025455	5.27206	4.16927	11.8191	5.67446	6.5461	7.87754	5.53675	21.83	5.98151	5.31811	CycT	Cyclin T [Source:FlyBase;Acc:FBgn0025455]
FBgn0025456	1.75755	0	0	2.00538	0	7.75788	1.65028	13.4881	0	0	CREG	Cellular Repressor of E1A-stimulated Genes [Source:FlyBase;Acc:FBgn0025456]
FBgn0025457	2.49725	10.6751	1.18445	8.48773	15.7056	8.94727	7.77285	0	0.808269	8.4459	Bub3	Bub3 [Source:FlyBase;Acc:FBgn0025457]
FBgn0025463	0.866495	1.33314	1.16386	2.39991	0.440376	2.82532	2.76713	9.97407	1.82987	3.22834	Bap60	Brahma associated protein 60kD [Source:FlyBase;Acc:FBgn0025463]
FBgn0025469	5.77063	0.0242822	0.699562	2.82845	0	6.83426	4.36451	0	0	0.195266	slv	saliva [Source:FlyBase;Acc:FBgn0025469]
FBgn0025519	0	2.33089	0	0.0689108	0.328768	1.51369	2.65549	0	1.04377	1.35585	fidipidine	fidipidine [Source:FlyBase;Acc:FBgn0025519]
FBgn0025525	2.40862	1.23144	5.6422	6.89638	2.84618	0	0.571852	0	0.849787	0.0377638	bab2	bric a brac 2 [Source:FlyBase;Acc:FBgn0025525]
FBgn0025549	20.4756	22.8471	23.6627	30.7173	23.094	23.5727	15.9566	56.1314	14.2486	18.4897	unc-119	unc-119 [Source:FlyBase;Acc:FBgn0025549]
FBgn0025558	146.601	145.882	69.5452	123.489	92.2351	134.142	106.773	122.13	91.6985	79.5487	CG4101	Protein anon-73B1 [Source:UniProtKB/Swiss-Prot;Acc:O77286]
FBgn0025571	2.74624	4.2	5.96652	5.92282	1.97489	3.61661	4.37843	4.78571	2.15813	1.30381	SF1	Splicing factor 1 [Source:FlyBase;Acc:FBgn0025571]
FBgn0025574	24.0198	41.6016	42.4265	24.3604	17.6065	35.3846	26.1166	41.8727	19.2155	17.6099	Pli	Pellino [Source:FlyBase;Acc:FBgn0025574]
FBgn0025582	6.69002	6.09668	2.85787	8.36949	2.06298	9.51232	9.23673	1.54315	6.57684	3.20161	Int6	Int6 homologue [Source:FlyBase;Acc:FBgn0025582]
FBgn0025592	5.13955	4.44012	0.569987	4.35112	0.060464	2.4219	2.106	0.0709513	1.26607	2.42859	Gyk	Glycerol kinase [Source:FlyBase;Acc:FBgn0025592]
FBgn0025608	7.77897	2.28628	2.27294	5.72904	1.76526	1.91844	3.01391	4.57664	4.28868	2.14629	Faf	Fas-associated factor [Source:FlyBase;Acc:FBgn0025608]
FBgn0025615	0.0660591	8.71653	1.94244	3.5112	0.74062	9.01416	10.4952	2.42891	3.07902	11.6442	Torsin	Torsin [Source:FlyBase;Acc:FBgn0025615]
FBgn0025621	0.29765	0.773878	0	0.281698	0	0	0.134265	0	0	0.0833461	CG16989	SD22791p [Source:UniProtKB/TrEMBL;Acc:Q9W5D3]
FBgn0025624	0.165094	1.92436	6.80686	0.12241	6.17369	5.00153	0.794829	0	0	2.59898	CG4025	CG4025 [Source:UniProtKB/TrEMBL;Acc:O77262]
FBgn0025625	5.5542	8.68366	35.0282	13.0985	13.6566	6.49635	14.7552	23.1299	10.5809	7.39639	Sik2	Salt-inducible kinase 2 [Source:FlyBase;Acc:FBgn0025625]
FBgn0025626	0.0937775	0.634956	3.45532	0.903973	2.38862	0.986814	1.60396	0	3.50444	1.65946	CG4281	CG4281 [Source:UniProtKB/TrEMBL;Acc:Q9W531]
FBgn0025628	0	0.630627	3.08115	0.279807	0.0193145	0	0.236481	0	0	0.911929	CG4199	CG4199, isoform B [Source:UniProtKB/TrEMBL;Acc:Q960D4]
FBgn0025629	7.79288	2.4804	2.45433	0.266524	4.62235	4.90307	1.23769	10.6641	6.07711	3.98043	CG4045	tRNA (guanine-N(7)-)-methyltransferase [Source:UniProtKB/Swiss-Prot;Acc:O77263]
FBgn0025630	3.54683	8.26982	7.70098	5.32351	9.27895	8.4983	15.8983	20.5174	22.4189	14.9749	CG4061	RNA 3'-terminal phosphate cyclase [Source:UniProtKB/Swiss-Prot;Acc:O77264]
FBgn0025631	0	0.295254	0	1.54992	0	0	0	0	0	0	moody	moody [Source:FlyBase;Acc:FBgn0025631]
FBgn0025632	0.989929	3.60127	4.62073	4.23688	2.88676	3.43845	3.04846	1.81546	1.13975	3.99257	CG4313	CG4313, isoform D [Source:UniProtKB/TrEMBL;Acc:Q9W533]
FBgn0025633	1.90647	2.01162	7.24929	2.68897	3.64991	2.45719	2.68587	6.5107	0.102546	0.801362	CG13366	FI18193p1 [Source:UniProtKB/TrEMBL;Acc:Q0KHX7]
FBgn0025634	3.09841	2.74137	2.2656	0.650294	0.148141	1.33043	1.43329	0	1.04744	1.34766	CG13367	EG:115C2.8 protein [Source:UniProtKB/TrEMBL;Acc:Q9W5E2]
FBgn0025635	2.48251	4.18778	3.72932	4.11175	0.0672849	4.56207	3.93822	2.06615	4.02052	2.13113	CG17829	EG:115C2.6 protein [Source:UniProtKB/TrEMBL;Acc:O77260]
FBgn0025637	135.142	176.517	84.1351	90.4607	32.7946	159.308	113.176	87.6637	153.221	89.5801	SkpA	SKP1-related A [Source:FlyBase;Acc:FBgn0025637]
FBgn0025638	70.7929	53.9727	47.2437	38.844	32.849	58.3858	50.6108	9.00652	80.4834	49.1591	Roc1a	Regulator of cullins 1a [Source:FlyBase;Acc:FBgn0025638]
FBgn0025639	3.24914	2.10678	8.43452	4.79026	4.87694	4.08394	3.2216	8.10024	3.49027	1.54656	Hmt4-20	Histone methyltransferase 4-20 [Source:FlyBase;Acc:FBgn0025639]
FBgn0025640	0.289038	0.198715	0	0.300052	1.98211	0.564937	1.20131	0	0.824057	1.81992	CG13369	Ribokinase [Source:UniProtKB/TrEMBL;Acc:O77425]
FBgn0025641	2.5678	1.1734	3.26833	3.50114	1.92175	2.49832	3.29675	0.0256468	3.0075	1.39905	DAAM	Dishevelled Associated Activator of Morphogenesis [Source:FlyBase;Acc:FBgn0025641]
FBgn0025643	0	0	0.41147	0	0	0.0455668	0.132838	0	0	0	CG3588	CG3588, isoform E [Source:UniProtKB/TrEMBL;Acc:Q9W4V1]
FBgn0025644	0	0	0	0	0	0.948099	0.274164	0	0	0	CG14424	EG:100G7.5 protein [Source:UniProtKB/TrEMBL;Acc:O76870]
FBgn0025674	4.46107	3.73856	4.5338	3.36742	6.64805	3.73925	3.21776	5.85425	4.6813	4.6996	CycK	Cyclin K [Source:FlyBase;Acc:FBgn0025674]
FBgn0025676	4.45987	8.08313	11.2737	4.90546	2.39514	5.98936	7.92516	4.07797	4.36901	7.35131	CkIIalpha-i3	CKII-alpha subunit interactor-3 [Source:FlyBase;Acc:FBgn0025676]
FBgn0025678	7.86383	10.8054	7.72587	10.2867	11.2365	13.3681	18.072	19.119	11.2244	15.9228	CaBP1	calcium-binding protein 1 [Source:FlyBase;Acc:FBgn0025678]
FBgn0025680	0	0	0	0	0	0	0.325647	0	0	0.0249566	cry	cryptochrome [Source:FlyBase;Acc:FBgn0025680]
FBgn0025681	1.75299	1.22328	4.16685	3.10507	1.09503	2.0807	2.08195	7.89193	0.771573	3.3195	CG3558	NA
FBgn0025682	1.14078	2.76923	3.49689	3.77028	0.384353	2.81171	2.56823	0	1.49479	1.31951	scf	supercoiling factor [Source:FlyBase;Acc:FBgn0025682]
FBgn0025683	0.270684	1.43887	0.117337	0.0316275	0.269607	6.44223	3.27876	0.370141	7.00838	1.73774	CG3164	CG3164, isoform A [Source:UniProtKB/TrEMBL;Acc:Q8IPV3]
FBgn0025684	6.5777	0.246226	0.3381	5.30258	2.46279	7.66731	7.11804	7.12679	3.61006	4.66635	MFS18	Major Facilitator Superfamily Transporter 18 [Source:FlyBase;Acc:FBgn0025684]
FBgn0025686	0.225421	0	0	0.859268	0.106328	0.106069	0.568744	0	0	0	Amnionless	Amnionless ortholog [Source:FlyBase;Acc:FBgn0025686]
FBgn0025687	0.478006	0.149188	0	0.368621	0	0.385577	0	0	0	0	LKR	lysine ketoglutarate reductase [Source:FlyBase;Acc:FBgn0025687]
FBgn0025692	0	0	0	0	0	0	0.362905	0	0	0.0600929	CG3814	AT21555p [Source:UniProtKB/TrEMBL;Acc:Q8T8W2]
FBgn0025693	0.40936	0.0956518	0	0	0	0	0.0232333	0	0.628798	0.576892	ZnT41F	Zinc transporter 41F [Source:FlyBase;Acc:FBgn0025693]
FBgn0025697	0	0	0	0	0	0	0.0193516	0	0	0.050053	santa-maria	scavenger receptor acting in neural tissue and majority of rhodopsin is absent [Source:FlyBase;Acc:FBgn0025697]
FBgn0025700	27.4298	23.5077	34.1534	28.7942	6.95396	15.5969	27.1161	0.805215	42.3691	27.926	CG5885	CG5885, isoform A [Source:UniProtKB/TrEMBL;Acc:Q9VL69]
FBgn0025702	8.13607	7.10641	27.8826	20.8952	3.50972	8.83648	4.05545	30.3011	13.9284	7.15276	srpk79D	serine-arginine protein kinase at 79D [Source:FlyBase;Acc:FBgn0025702]
FBgn0025712	143.316	133.262	76.1573	98.3915	49.2797	177.865	96.581	58.7276	85.7558	68.9848	CG13920	GH07209p [Source:UniProtKB/TrEMBL;Acc:Q8T0T9]
FBgn0025716	5.97131	5.71274	2.92751	1.07014	1.0354	3.6566	5.25823	16.3614	0.878468	1.41042	Bap55	Brahma associated protein 55kD [Source:FlyBase;Acc:FBgn0025716]
FBgn0025720	3.41417	6.74001	1.17959	1.73427	0.190941	0.253455	2.44244	11.1781	3.13206	0.209531	Ate1	Ate1 [Source:FlyBase;Acc:FBgn0025720]
FBgn0025724	2.42647	2.75801	0	1.45131	0.465398	0.350777	1.78406	0	2.47488	1.6634	beta'COP	Coat Protein (coatomer) beta' [Source:FlyBase;Acc:FBgn0025724]
FBgn0025725	3.42281	1.76182	2.85011	1.79209	1.64421	2.25702	2.92896	3.27357	3.22721	1.13225	alphaCOP	Coat Protein (coatomer) alpha [Source:FlyBase;Acc:FBgn0025725]
FBgn0025726	41.5075	28.6589	88.8028	66.2651	35.9545	37.9666	36.8181	100.387	42.4891	26.6875	unc-13	unc-13 [Source:FlyBase;Acc:FBgn0025726]
FBgn0025740	13.3072	9.92934	11.3345	18.1705	8.56555	15.7289	9.47715	16.6761	13.9089	10.4768	PlexB	Plexin B [Source:FlyBase;Acc:FBgn0025740]
FBgn0025741	12.8685	9.02918	28.1359	18.8222	11.3362	20.0761	13.713	38.2131	19.7367	17.2734	PlexA	Plexin A [Source:FlyBase;Acc:FBgn0025741]
FBgn0025742	1.325	0.0825667	0	0.523995	0.61768	0.0880249	2.03233	0	3.51931	0.342356	mtm	myotubularin [Source:FlyBase;Acc:FBgn0025742]
FBgn0025743	5.24937	2.93144	1.91793	4.60014	1.98246	3.71466	2.80865	3.3498	3.74417	4.57311	mbt	mushroom bodies tiny [Source:FlyBase;Acc:FBgn0025743]
FBgn0025777	9.50886	3.14471	11.9326	12.062	5.81807	4.56485	7.07612	8.76323	10.9089	9.54573	homer	homer [Source:FlyBase;Acc:FBgn0025777]
FBgn0025781	0.0609125	0.907348	0	2.10586	0	0.221104	0.751656	0	0	0	Cdc16	Cell division cycle 16 ortholog [Source:FlyBase;Acc:FBgn0025781]
FBgn0025790	6.92012	4.87931	7.72082	11.3028	7.23786	4.70988	10.9623	16.2372	8.9308	8.03177	TBPH	TAR DNA-binding protein-43 homolog [Source:FlyBase;Acc:FBgn0025790]
FBgn0025800	12.704	11.6777	28.4841	23.9159	12.4392	15.1981	16.4654	26.5562	7.38849	15.4331	Smox	Smad on X [Source:FlyBase;Acc:FBgn0025800]
FBgn0025802	1.486	0.328494	0.348826	1.53585	0.0135025	1.34797	0.49984	0.70751	1.50573	0.517525	Sbf	SET domain binding factor [Source:FlyBase;Acc:FBgn0025802]
FBgn0025808	1.00718	0	0	0.0504354	0	1.10786	1.69113	20.5277	0	1.37099	Rad17	Rad17 [Source:FlyBase;Acc:FBgn0025808]
FBgn0025809	48.9331	42.5978	52.7694	48.2555	56.3026	53.2152	50.0133	47.0882	64.3071	45.9157	Paf-AHalpha	Platelet-activating factor acetylhydrolase alpha [Source:FlyBase;Acc:FBgn0025809]
FBgn0025814	17.0409	16.6931	11.4821	2.89727	11.5796	0	3.64795	26.8746	0.0843925	2.65756	Mgstl	Microsomal glutathione S-transferase-like [Source:FlyBase;Acc:FBgn0025814]
FBgn0025815	0	0.104602	0	0.343659	0	0.320252	0.508142	0	0	0.679397	Mcm6	Minichromosome maintenance 6 [Source:FlyBase;Acc:FBgn0025815]
FBgn0025820	21.7596	13.8867	38.8089	16.5371	4.91076	7.76266	15.9414	13.9883	10.6523	17.8809	JTBR	JTBR [Source:FlyBase;Acc:FBgn0025820]
FBgn0025825	2.48783	1.47075	0	3.3757	0	1.66839	0.788383	0	2.82694	0.342287	Hdac3	Histone deacetylase 3 [Source:FlyBase;Acc:FBgn0025825]
FBgn0025827	0	0	0	0	1.12054	0.1656	0.962095	0	0	0	CG6421	CG6421 [Source:UniProtKB/TrEMBL;Acc:A1ZAL1]
FBgn0025830	0	0.0404665	0	0.104317	0	0.573259	0.325708	1.43377	1.03691	0.196949	IntS8	Integrator 8 [Source:FlyBase;Acc:FBgn0025830]
FBgn0025832	0.127652	1.59318	0	0	0	0.565239	1.46193	1.71172	0	2.1085	Fen1	Flap endonuclease 1 [Source:FlyBase;Acc:FBgn0025832]
FBgn0025833	0.635671	0.273965	0.363962	0.896579	0.899765	5.16846	6.73347	1.65761	4.20951	6.53848	CG8910	CG8910 [Source:UniProtKB/TrEMBL;Acc:A1ZAL4]
FBgn0025835	0.908354	0.070568	0.360537	0	0.925913	0.175881	0.332375	0.0291617	0	0	CG17707	Uncharacterized protein, isoform B [Source:UniProtKB/TrEMBL;Acc:A8JUS7]
FBgn0025836	6.38295	3.29642	6.40318	6.66304	3.46681	4.4556	4.21447	7.59948	1.89338	3.97505	RhoGAP1A	Rho GTPase activating protein at 1A [Source:FlyBase;Acc:FBgn0025836]
FBgn0025838	2.09724	0	0.985944	0	0	0.667154	0.626998	0	0	0	CG2652	CG2652 [Source:UniProtKB/TrEMBL;Acc:Q9W4X1]
FBgn0025839	85.0153	111.556	105.451	67.6133	52.6737	80.0058	74.8504	34.5404	51.3026	73.0643	CG3621	EG:152A3.7 protein [Source:UniProtKB/TrEMBL;Acc:O97418]
FBgn0025864	0.573256	0.990181	7.79326	3.06865	1.31118	2.30745	1.11502	4.96257	2.03427	3.30159	Crag	Calmodulin-binding protein related to a Rab3 GDP/GTP exchange protein [Source:FlyBase;Acc:FBgn0025864]
FBgn0025865	5.69778	2.95357	4.86897	5.41853	3.57452	4.24105	2.08025	5.83798	3.27483	3.86166	Cortactin	Cortactin [Source:FlyBase;Acc:FBgn0025865]
FBgn0025866	0.37225	0.857983	1.56146	0	0.983231	0.232862	0.707077	0.0611725	0.328868	0.0714844	CalpB	Calpain-B [Source:FlyBase;Acc:FBgn0025866]
FBgn0025874	1.20535	1.9272	3.47012	2.39423	0	0.80779	1.40966	1.06035	1.37429	1.85028	Meics	Meiotic central spindle [Source:FlyBase;Acc:FBgn0025874]
FBgn0025878	0.0119146	0.0946555	0	1.65386	0	0	0.0229912	0	0	0.0832537	wrapper	wrapper [Source:FlyBase;Acc:FBgn0025878]
FBgn0025879	0.416654	0	0	0	0	0.130382	0.778537	8.3462	0	0	Timp	Tissue inhibitor of metalloproteases [Source:FlyBase;Acc:FBgn0025879]
FBgn0025885	0.0355586	0.388431	0	0.18281	0	0	0.583239	0	0.0599055	0.177476	Inos	Inos [Source:FlyBase;Acc:FBgn0025885]
FBgn0025936	22.4817	27.845	39.0156	34.6253	21.7695	25.1763	25.928	57.709	20.0853	17.7524	Eph	Eph receptor tyrosine kinase [Source:FlyBase;Acc:FBgn0025936]
FBgn0026015	0.936273	0.676572	0.180092	0.61389	0.257632	0.838778	0.656511	3.34713	0.314898	0.380829	Top3beta	Topoisomerase 3beta [Source:FlyBase;Acc:FBgn0026015]
FBgn0026056	3.43897	4.03246	0.324853	1.31343	3.89474	0.973459	2.10113	1.32076	0.443797	0.498722	Rlip	Ral interacting protein [Source:FlyBase;Acc:FBgn0026056]
FBgn0026059	1.8633	2.56367	5.26438	6.54389	1.8897	3.03547	2.73626	13.697	3.06532	3.09091	Mhcl	Myosin heavy chain-like [Source:FlyBase;Acc:FBgn0026059]
FBgn0026060	4.60587	1.01985	0	8.51166	0	0.376689	2.39971	0	4.05258	0	Mipp2	Multiple inositol polyphosphate phosphatase 2 [Source:FlyBase;Acc:FBgn0026060]
FBgn0026076	6.42964	8.77862	22.697	16.575	6.396	11.8002	6.35455	21.0066	1.82171	7.23918	UBL3	UBL3 [Source:FlyBase;Acc:FBgn0026076]
FBgn0026079	2.21361	0.717225	0.156538	3.12839	1.89138	0.662025	0.66969	0	0	0.299616	Nsun2	NOP2-Sun domain family, member 2 ortholog [Source:FlyBase;Acc:FBgn0026079]
FBgn0026080	3.2503	4.34528	2.4749	3.94892	0.13155	4.16044	3.50312	10.5888	4.97214	0.163185	Tip60	Tip60 [Source:FlyBase;Acc:FBgn0026080]
FBgn0026083	2.63833	2.66559	7.77213	6.41866	2.54527	4.23651	2.56975	16.4398	1.7048	4.95511	tyf	twenty-four [Source:FlyBase;Acc:FBgn0026083]
FBgn0026084	59.5855	87.1699	123.462	81.4577	80.2807	81.9367	131.204	94.2653	75.7658	110.275	cib	ciboulot [Source:FlyBase;Acc:FBgn0026084]
FBgn0026085	0.279354	0.573603	0	0	0.414711	0	3.32986	0	0.431052	2.05518	dgt4	dim gamma-tubulin 4 [Source:FlyBase;Acc:FBgn0026085]
FBgn0026086	14.8718	10.5759	39.4264	29.337	12.5672	8.11295	10.5329	33.1316	16.9642	9.20054	Adar	Adenosine deaminase acting on RNA [Source:FlyBase;Acc:FBgn0026086]
FBgn0026088	153.046	153.625	54.6462	82.2161	108.029	90.8052	89.0634	155.234	52.578	72.0643	CG14818	GEO09632p1 [Source:UniProtKB/TrEMBL;Acc:M9PDI2]
FBgn0026089	33.5456	20.0509	29.7548	5.08907	14.0445	26.0332	14.8791	30.291	0.3493	7.91013	CG14817	GEO02601p1 [Source:UniProtKB/TrEMBL;Acc:Q9W551]
FBgn0026090	17.31	3.55952	23.136	5.56202	1.2644	15.0559	4.8923	43.1763	37.2628	10.2541	CG14812	EG:131F2.3 protein [Source:UniProtKB/TrEMBL;Acc:O96824]
FBgn0026141	0	0	0	0	0	1.91755	1.35828	3.16165	1.14298	1.64488	Cdlc2	Cytoplasmic dynein light chain 2 [Source:FlyBase;Acc:FBgn0026141]
FBgn0026143	0.220029	0.0624293	0.124901	1.29279	0	0	0	2.25895	0	0	CDC45L	CDC45L [Source:FlyBase;Acc:FBgn0026143]
FBgn0026144	1.45693	0.105607	0	0	0	4.50354	1.24153	0.426564	2.95614	1.45433	CBP	sarcoplasmic calcium-binding protein [Source:FlyBase;Acc:FBgn0026144]
FBgn0026147	8.48174	7.53345	33.8113	13.4084	9.39443	11.1571	5.43178	27.1318	0.768795	1.47895	CG16833	Uncharacterized protein, isoform D [Source:UniProtKB/TrEMBL;Acc:Q8IPB2]
FBgn0026148	2.26452	6.18938	1.23829	6.92919	2.91045	9.85381	7.25623	1.04166	8.82008	3.75365	CG12253	LD32974p [Source:UniProtKB/TrEMBL;Acc:Q9VKM0]
FBgn0026149	7.55503	1.8945	6.52166	5.32337	0.216188	3.32026	3.91978	14.5177	0	1.58314	BCL7-like	BCL7-like [Source:FlyBase;Acc:FBgn0026149]
FBgn0026150	6.38134	6.5939	0.567311	4.80593	3.58362	5.85416	3.13764	6.47664	6.52855	5.59886	ApepP	Aminopeptidase P [Source:FlyBase;Acc:FBgn0026150]
FBgn0026160	15.2618	15.451	32.4241	23.0929	17.8577	1.55332	1.13491	2.6139	0.315138	1.13644	tna	tonalli [Source:FlyBase;Acc:FBgn0026160]
FBgn0026179	11.0621	9.74043	25.2352	14.8711	7.08051	15.452	8.70567	13.5838	3.57598	9.25103	siz	schizo [Source:FlyBase;Acc:FBgn0026179]
FBgn0026181	0.505265	0.553888	0.973649	1.29843	0.106468	0.337496	0.949959	0.26996	1.04084	1.00927	Rok	Rho kinase [Source:FlyBase;Acc:FBgn0026181]
FBgn0026189	58.3726	46.6121	119.174	95.7037	52.9726	18.2457	19.0443	55.0749	17.2778	20.1058	prominin-like	prominin-like [Source:FlyBase;Acc:FBgn0026189]
FBgn0026192	2.59667	3.19577	8.60724	2.68136	4.00421	3.55062	3.45469	37.3893	5.24704	11.3799	par-6	par-6 [Source:FlyBase;Acc:FBgn0026192]
FBgn0026196	0.0789837	0.679776	5.46097	2.66479	7.46044	0.297318	0.24132	5.28023	1.19757	0	nop5	nop5 [Source:FlyBase;Acc:FBgn0026196]
FBgn0026199	3.68325	1.37488	3.34987	2.70912	3.40352	5.03806	2.5095	32.0538	2.27233	4.03906	myo	myoglianin [Source:FlyBase;Acc:FBgn0026199]
FBgn0026206	17.1866	10.6478	36.7249	22.6767	16.9709	14.2829	15.7305	50.8298	17.2353	13.6137	mei-P26	meiotic P26 [Source:FlyBase;Acc:FBgn0026206]
FBgn0026207	0.0622007	0	4.2794	0.222704	0	0.67734	0.591561	0	3.32332	0	mbo	members only [Source:FlyBase;Acc:FBgn0026207]
FBgn0026238	18.907	28.2045	21.4871	21.7814	16.0554	20.3132	30.883	38.5071	20.9278	8.51633	gus	gustavus [Source:FlyBase;Acc:FBgn0026238]
FBgn0026239	15.9412	17.4265	29.9408	28.0085	10.5102	24.0603	14.9658	24.9134	27.1324	19.5853	gukh	GUK-holder [Source:FlyBase;Acc:FBgn0026239]
FBgn0026250	73.0537	71.9307	67.1719	68.6433	42.9877	60.7197	50.9755	82.5692	47.4777	37.3095	eIF-1A	Eukaryotic initiation factor 1A [Source:FlyBase;Acc:FBgn0026250]
FBgn0026252	3.09654	1.11272	1.67129	3.32013	2.72984	2.01025	0.868071	5.34132	1.81331	1.22319	msk	moleskin [Source:FlyBase;Acc:FBgn0026252]
FBgn0026255	0	0	0	0	0	0.264122	0.0193422	0	0	0	clumsy	clumsy [Source:FlyBase;Acc:FBgn0026255]
FBgn0026257	6.17843	3.20601	2.49076	1.71515	0	1.70626	1.2466	0	1.57562	0.625661	cav	caravaggio [Source:FlyBase;Acc:FBgn0026257]
FBgn0026259	0.555993	2.64916	3.51454	2.30317	1.08574	2.99811	3.40971	0.613294	1.35819	2.96894	eIF5B	eIF5B [Source:FlyBase;Acc:FBgn0026259]
FBgn0026261	5.69304	2.23449	0.246783	3.15948	0	2.66544	4.70986	0	6.72746	4.50106	bonsai	bonsai [Source:FlyBase;Acc:FBgn0026261]
FBgn0026262	22.7805	28.2461	45.4606	29.2078	15.1561	30.9986	25.7863	68.7409	33.8483	23.5277	bip2	bip2 [Source:FlyBase;Acc:FBgn0026262]
FBgn0026263	5.12867	8.88523	5.77954	6.41469	2.9658	9.91707	7.13729	12.1274	3.1197	9.08409	bip1	bip1 [Source:FlyBase;Acc:FBgn0026263]
FBgn0026268	0	0	0	0	0.0623408	0	0.481734	0	0	0	antdh	antdh [Source:FlyBase;Acc:FBgn0026268]
FBgn0026309	0.0213741	2.63911	0.107114	0.0212665	0	0.0895528	2.32038	0	0.28916	0.119422	aft	adrift [Source:FlyBase;Acc:FBgn0026309]
FBgn0026313	2.25573	1.86366	8.72672	6.34707	3.53309	2.29763	2.87323	8.89917	3.88101	3.75183	X11L	X11L [Source:FlyBase;Acc:FBgn0026313]
FBgn0026316	14.5452	21.8482	23.5936	13.1723	7.10868	24.0888	18.2696	26.0136	19.4601	14.2218	Ubc10	Ubiquitin conjugating enzyme 10 [Source:FlyBase;Acc:FBgn0026316]
FBgn0026317	0	0.874557	1.22479	0.663902	2.4205	0.462201	0.337701	3.19847	1.33149	0.66496	Tsc1	Tsc1 [Source:FlyBase;Acc:FBgn0026317]
FBgn0026319	0.39968	0	0	0.0187939	0	3.9356	0.592547	0	4.0072	0.437893	Traf4	TNF-receptor-associated factor 4 [Source:FlyBase;Acc:FBgn0026319]
FBgn0026323	5.70186	2.23346	2.62773	3.73978	0.59266	3.36059	3.43126	2.21046	1.73303	4.43014	Tak1	TGF-beta activated kinase 1 [Source:FlyBase;Acc:FBgn0026323]
FBgn0026324	50.4449	56.4719	22.2544	11.8695	21.7802	55.883	102.771	49.7887	26.0976	44.4737	Taf10b	TBP-associated factor 10b [Source:FlyBase;Acc:FBgn0026324]
FBgn0026326	0.987116	1.13933	1.82748	0.349451	1.76821	2.73694	1.9229	13.9524	0.902768	1.00398	Mad1	FI09619p [Source:UniProtKB/TrEMBL;Acc:Q7KND8]
FBgn0026369	2.14737	1.23927	0.67364	0.299601	1.52933	0.864175	1.48574	0	0.0476011	1.10468	Sara	Smad anchor for receptor activation [Source:FlyBase;Acc:FBgn0026369]
FBgn0026370	6.54806	9.33898	20.4762	10.7659	6.27542	6.74825	7.415	6.31768	12.7539	7.80923	SRPK	SRPK [Source:FlyBase;Acc:FBgn0026370]
FBgn0026371	6.47663	3.95765	0.0272438	6.23765	4.64724	2.91747	2.59128	8.07405	0.809733	5.36279	SAK	Sak kinase [Source:FlyBase;Acc:FBgn0026371]
FBgn0026372	174.928	201.292	144.682	159.1	105.472	167.982	135.725	150.607	136.472	130.758	RpL23A	Ribosomal protein L23A [Source:FlyBase;Acc:FBgn0026372]
FBgn0026373	2.87558	6.12053	2.45089	5.19521	0	8.06183	6.14233	0	15.8273	5.21633	RpII33	RNA polymerase II 33kD subunit [Source:FlyBase;Acc:FBgn0026373]
FBgn0026374	0.531453	0.105488	1.51955	0	0.122986	1.1178	0.512463	3.53456	0	0.448533	Rhp	Rhophilin [Source:FlyBase;Acc:FBgn0026374]
FBgn0026375	5.13912	6.2505	19.7463	12.5381	5.13827	11.248	13.9424	31.3054	9.08132	9.96459	RhoGAPp190	Rho GTPase activating protein p190 [Source:FlyBase;Acc:FBgn0026375]
FBgn0026376	8.71169	3.51407	7.67715	7.31568	6.22161	5.3731	6.59126	0.530132	5.26117	2.8966	Rgl	Ral guanine nucleotide dissociation stimulator-like ortholog (M. musculus) [Source:FlyBase;Acc:FBgn0026376]
FBgn0026378	6.24558	3.47797	1.23155	5.12442	1.27918	3.57145	1.63734	15.3576	5.36648	1.19973	Rep	Rab escort protein [Source:FlyBase;Acc:FBgn0026378]
FBgn0026379	10.6204	13.3646	29.3415	9.47617	7.98652	17.7001	16.3683	40.389	4.3747	9.64467	Pten	Pten [Source:FlyBase;Acc:FBgn0026379]
FBgn0026380	19.2881	33.6968	36.5377	21.3684	17.6118	36.7984	33.4559	94.0699	32.286	28.6488	Prosbeta3	Proteasome beta3 subunit [Source:FlyBase;Acc:FBgn0026380]
FBgn0026393	7.76278	1.88586	0	2.79627	0	3.80176	3.33846	0	0.50396	1.09128	Or43b	Odorant receptor 43b [Source:FlyBase;Acc:FBgn0026393]
FBgn0026396	0	0	0	0	0	0.484381	0.517303	4.30119	0	0.0214081	Or22c	Odorant receptor 22c [Source:FlyBase;Acc:FBgn0026396]
FBgn0026397	0	0.0974527	0	0	0	13.7973	3.48432	1.67291	5.09203	3.1654	Or22b	Odorant receptor 22b [Source:FlyBase;Acc:FBgn0026397]
FBgn0026398	0	0	0	0	0	6.05063	0.847459	5.28474	3.87694	2.40996	Or22a	Odorant receptor 22a [Source:FlyBase;Acc:FBgn0026398]
FBgn0026400	5.02552	4.59968	30.9755	4.64346	8.20928	3.72685	7.28437	0	2.77014	3.05156	Noa36	Noa36 [Source:FlyBase;Acc:FBgn0026400]
FBgn0026401	10.938	11.4369	18.9771	16.2174	6.46304	10.0566	10.1641	28.8487	15.6595	7.73356	Nipped-B	Nipped-B [Source:FlyBase;Acc:FBgn0026401]
FBgn0026402	2.69521	8.60573	0	1.44337	0.397281	0.792624	2.07674	0	0.522251	1.79361	NiPp1	Nuclear inhibitor of Protein phosphatase 1 [Source:FlyBase;Acc:FBgn0026402]
FBgn0026403	0.818628	0.127238	0.605361	0.322504	0.678722	0.43964	0.580879	1.77775	1.33514	0.147944	Ndg	Nidogen/entactin [Source:FlyBase;Acc:FBgn0026403]
FBgn0026404	0.932658	4.50359	4.61397	1.0339	1.93016	1.34947	2.66584	6.19605	0	1.52451	Dronc	Death regulator Nedd2-like caspase [Source:FlyBase;Acc:FBgn0026404]
FBgn0026409	23.701	22.8544	35.216	26.7382	18.7676	34.1279	24.5698	6.43582	9.89347	14.4179	Mpcp	Mitochondrial phosphate carrier protein [Source:FlyBase;Acc:FBgn0026409]
FBgn0026415	0	0.177788	0	0	0	0.827086	0	0	0	0	Idgf4	Imaginal disc growth factor 4 [Source:FlyBase;Acc:FBgn0026415]
FBgn0026417	0.76146	0.182324	0.166633	1.50011	0.889962	2.47442	1.18337	7.40194	11.2538	1.82208	Hus1-like	Hus1-like [Source:FlyBase;Acc:FBgn0026417]
FBgn0026418	15.368	11.729	21.0206	22.1786	10.0859	15.4186	8.95148	29.1167	12.2806	8.92587	Hsc70Cb	Hsc70Cb [Source:FlyBase;Acc:FBgn0026418]
FBgn0026427	1.5776	1.22246	3.68524	2.788	0.777957	1.25051	1.61038	5.27328	1.77572	1.08353	Su(var)2-HP2	Su(var)2-HP2 [Source:FlyBase;Acc:FBgn0026427]
FBgn0026428	1.32495	0.284906	2.48096	0.524986	2.22463	1.65046	0.725333	0.0975234	0.145818	0.626164	HDAC6	HDAC6 [Source:FlyBase;Acc:FBgn0026428]
FBgn0026430	4.13735	1.91521	3.56759	8.37154	2.74144	1.13823	3.90789	6.71943	5.75069	5.95241	Grip84	Gamma-tubulin ring protein 84 [Source:FlyBase;Acc:FBgn0026430]
FBgn0026431	1.24056	0.670948	8.66075	0.98752	0.568763	1.80803	0.591045	0	0	1.17898	Grip75	Grip75 [Source:FlyBase;Acc:FBgn0026431]
FBgn0026432	1.6804	0.813336	0.650888	0.843945	1.27886	1.28903	1.04	5.68772	0.0713689	0.671903	Grip163	Grip163 [Source:FlyBase;Acc:FBgn0026432]
FBgn0026433	0	0	0	0	0	0	0.116669	0.0638198	0	0.559059	Grip128	Grip128 [Source:FlyBase;Acc:FBgn0026433]
FBgn0026438	0.124224	3.42216	1.60823	4.08397	2.36558	0.807302	0.96917	4.65496	0.0494093	0.065871	Eaat2	Excitatory amino acid transporter 2 [Source:FlyBase;Acc:FBgn0026438]
FBgn0026439	0	0	0	1.37618	0	0	0.170245	0	0	0	Eaat1	Excitatory amino acid transporter 1 [Source:FlyBase;Acc:FBgn0026439]
FBgn0026441	3.90404	4.4183	2.90131	7.60094	3.88037	7.25989	4.07489	15.5712	2.61601	4.45224	ear	ENL/AF9-related [Source:FlyBase;Acc:FBgn0026441]
FBgn0026479	2.99377	3.85327	5.18373	5.30418	4.18904	5.73703	4.39681	5.91195	7.84871	0.701197	Drp1	Dynamin related protein 1 [Source:FlyBase;Acc:FBgn0026479]
FBgn0026533	11.5042	7.59101	8.88859	13.9255	12.9331	10.9259	9.64085	16.5691	10.6558	7.97364	Dek	Dek [Source:FlyBase;Acc:FBgn0026533]
FBgn0026566	18.4979	20.0681	14.6503	11.9078	8.53848	10.9098	19.3143	15.2461	27.5882	9.83323	CG1307	Probable peptidyl-tRNA hydrolase 2 [Source:UniProtKB/Swiss-Prot;Acc:O97067]
FBgn0026573	3.74955	3.59995	5.62677	5.28554	1.19028	6.978	3.97045	10.7029	2.26279	2.33195	ADD1	ADD domain-containing protein 1 [Source:FlyBase;Acc:FBgn0026573]
FBgn0026575	3.35267	3.23559	15.4009	7.3952	4.95051	6.97453	5.87052	10.2998	5.37084	4.03113	hang	hangover [Source:FlyBase;Acc:FBgn0026575]
FBgn0026576	0.890411	0.717583	0.651995	1.10467	2.71361	1.72796	0.782994	0	0	0	CG5991	Phosphatidylserine decarboxylase proenzyme, mitochondrial [Source:UniProtKB/TrEMBL;Acc:Q9VCE0]
FBgn0026577	3.00277	3.44141	7.4772	6.29653	2.81579	3.37668	3.16273	8.88123	5.51839	2.61005	CG8677	CG8677, isoform B [Source:UniProtKB/TrEMBL;Acc:Q9VID9]
FBgn0026582	3.7046	2.3958	0	0.18075	0.897963	0.912015	4.06272	0	4.3947	2.22738	Hmg-2	High mobility group protein 2 [Source:FlyBase;Acc:FBgn0026582]
FBgn0026592	1.58637	5.75353	0.082221	0.0664868	0.219602	9.20081	11.6625	3.11242	4.77532	7.88334	Fie	Fire exit [Source:FlyBase;Acc:FBgn0026592]
FBgn0026597	1.41311	1.38556	6.93819	3.30629	0.153804	1.43349	2.61744	5.20949	1.01679	0.322711	Axn	Axin [Source:FlyBase;Acc:FBgn0026597]
FBgn0026598	0	0.508921	0.298485	0.669813	0	0.092769	0.425985	0	0	0.170029	Apc2	Adenomatous polyposis coli tumor suppressor homolog 2 [Source:FlyBase;Acc:FBgn0026598]
FBgn0026602	0.326633	1.72647	0.276328	0.914109	1.61027	0.773424	2.19586	0.369805	2.84015	1.15696	Ady43A	Ady43A [Source:FlyBase;Acc:FBgn0026602]
FBgn0026616	5.25291	3.6703	5.78271	4.36059	2.76786	0.0332972	0.0386844	0	0	0	alpha-Man-IIb	alpha-Man-IIb [Source:FlyBase;Acc:FBgn0026616]
FBgn0026619	5.00333	1.3041	4.06764	6.87414	2.8076	12.17	2.9334	1.27535	1.90543	3.09555	Taz	Tafazzin [Source:FlyBase;Acc:FBgn0026619]
FBgn0026620	18.9969	20.7491	19.7701	15.0973	19.03	20.0096	15.7769	25.7714	23.1373	5.54178	tacc	transforming acidic coiled-coil protein [Source:FlyBase;Acc:FBgn0026620]
FBgn0026630	1.01111	1.08314	0	0.52069	0	3.75383	1.42822	0	0	0.868996	nes	nessy [Source:FlyBase;Acc:FBgn0026630]
FBgn0026634	0.271951	0.592996	0.223838	0.305878	0	0	0.170257	2.57136	0.18065	0.404915	ldlCp	ldlCp-related protein [Source:FlyBase;Acc:FBgn0026634]
FBgn0026666	16.052	9.3753	7.39524	26.5315	5.514	7.32917	10.2128	0	37.5594	12.153	l(1)G0136	lethal (1) G0136 [Source:FlyBase;Acc:FBgn0026666]
FBgn0026679	0	0	2.1209	0	0.135844	0.32523	0.074098	0	0	0	IntS4	Integrator 4 [Source:FlyBase;Acc:FBgn0026679]
FBgn0026702	0	0.177788	0.87307	0	0	0	0	0	0	0	l(1)G0045	lethal (1) G0045 [Source:FlyBase;Acc:FBgn0026702]
FBgn0026713	0.837125	0.409635	0	0.491188	0	0.224115	0.591126	0	0.716742	0.871966	l(1)G0007	lethal (1) G0007 [Source:FlyBase;Acc:FBgn0026713]
FBgn0026718	3.25693	0.493205	0	0	0.479176	2.90081	0.820393	0	11.4638	0	fu12	fu12 [Source:FlyBase;Acc:FBgn0026718]
FBgn0026721	0	0	0	2.94218	0.19632	0.0261122	0	0	0	0.147722	fat-spondin	fat-spondin [Source:FlyBase;Acc:FBgn0026721]
FBgn0026722	2.05324	0.688097	0.170058	2.15112	0.638048	0.402752	0.707864	0.43427	0.549334	1.39351	drosha	drosha [Source:FlyBase;Acc:FBgn0026722]
FBgn0026737	7.71694	6.29509	1.04438	1.95296	1.65145	1.91532	0.567112	0	1.04354	0.488027	CG6171	Aprataxin and PNK-like factor [Source:UniProtKB/Swiss-Prot;Acc:A8JR14]
FBgn0026738	3.83893	0.415139	0	1.44677	0.576763	1.88835	4.023	0	0	3.19006	CG7857	CG7857 [Source:UniProtKB/TrEMBL;Acc:Q9VUN9]
FBgn0026741	5.78656	11.0348	0.399885	13.177	3.11513	4.38015	4.04616	4.20483	2.96697	2.92999	mRpL18	mitochondrial ribosomal protein L18 [Source:FlyBase;Acc:FBgn0026741]
FBgn0026749	24.9754	34.2527	8.41157	11.2768	12.7112	20.0524	19.0226	15.3885	15.0551	16.3117	Yippee	Yippee [Source:FlyBase;Acc:FBgn0026749]
FBgn0026751	0.517197	0.138279	0.497973	0	0.0422231	1.29168	0.700533	0	0	1.18148	XRCC1	XRCC1 [Source:FlyBase;Acc:FBgn0026751]
FBgn0026756	0	0	0.214349	0	0	0	0.072361	0.679744	0.101577	0	Ugt37a1	UDP-glycosyltransferase 37a1 [Source:FlyBase;Acc:FBgn0026756]
FBgn0026760	0	0.188278	0	0	0	0.639575	0.890303	0	0	0.970189	Tehao	Tehao [Source:FlyBase;Acc:FBgn0026760]
FBgn0026761	0.290684	0.398161	1.76843	0	1.38294	0.594275	0.715661	0.150772	0.303961	0.0900515	Trap1	Trap1 [Source:FlyBase;Acc:FBgn0026761]
FBgn0026777	10.7153	15.1095	17.3604	13.3017	10.7351	19.0567	12.1482	19.1028	15.2	10.0923	Rad23	Rad23 [Source:FlyBase;Acc:FBgn0026777]
FBgn0026778	1.81712	1.00986	0	0	0.0353853	0.917775	0.498622	0	0	0	Rad1	Radiation insensitive 1 [Source:FlyBase;Acc:FBgn0026778]
FBgn0026787	3.31018	2.44381	2.76642	6.56462	0	4.63744	2.95109	6.3588	3.39512	3.91634	Nhe1	Na[+]/H[+] hydrogen exchanger 1 [Source:FlyBase;Acc:FBgn0026787]
FBgn0026869	3.00524	7.03427	13.9143	7.45878	2.74672	7.1238	7.21964	10.8652	7.38668	4.78182	Thd1	Thd1 [Source:FlyBase;Acc:FBgn0026869]
FBgn0026872	1.42247	5.85652	11.3344	3.31975	9.21691	13.8387	8.75717	0	5.57239	5.8909	CG14777	IP10007p [Source:UniProtKB/TrEMBL;Acc:Q9W588]
FBgn0026873	30.8354	14.0326	0.0827756	2.07499	11.2016	9.01783	8.03957	24.1969	9.82653	8.97623	MED18	Mediator complex subunit 18 [Source:FlyBase;Acc:FBgn0026873]
FBgn0026876	0	1.40897	0.706272	0.601176	0	0.638261	0.631811	0	0.354602	0	CG11403	EG:33C11.2 protein [Source:UniProtKB/TrEMBL;Acc:Q9XZS9]
FBgn0026878	0	0	0	0	0	1.88371	0.12262	0	0	1.16911	CG4325	CG4325, isoform A [Source:UniProtKB/TrEMBL;Acc:Q9XZS4]
FBgn0026879	758.191	772.932	550.616	658.38	566.211	508.39	539.938	352.324	620.063	551.174	CG13364	Translation machinery-associated protein 7 homolog [Source:UniProtKB/Swiss-Prot;Acc:Q9XZS3]
FBgn0027052	4.82666	10.2029	0.047749	2.20086	2.93323	9.49915	4.4637	9.13794	6.95056	2.85885	CHIP	CHIP ortholog [Source:FlyBase;Acc:FBgn0027052]
FBgn0027053	7.75306	8.26891	0.46947	5.61012	0.603729	13.5177	11.6811	1.3164	14.2111	9.85269	CSN5	COP9 signalosome subunit 5 [Source:FlyBase;Acc:FBgn0027053]
FBgn0027054	6.02258	5.6448	12.6244	5.83811	1.61589	5.77915	7.32878	8.73668	13.7944	4.81286	CSN4	COP9 signalosome subunit 4 [Source:FlyBase;Acc:FBgn0027054]
FBgn0027055	0.763067	2.90241	2.98635	4.82973	1.43632	4.55251	4.94527	0.64969	0.26681	4.91518	CSN3	COP9 signalosome subunit 3 [Source:FlyBase;Acc:FBgn0027055]
FBgn0027057	7.25168	6.08233	4.70947	8.45992	3.2642	7.52304	9.31186	0.332352	10.6758	8.03279	CSN1b	COP9 signalosome subunit 1b [Source:FlyBase;Acc:FBgn0027057]
FBgn0027066	9.28601	13.6727	13.5708	15.0353	7.25764	20.3405	14.5727	13.0043	12.8041	12.3549	Eb1	Eb1 [Source:FlyBase;Acc:FBgn0027066]
FBgn0027079	2.17884	0.111724	0.0159629	0	0.667948	0.529276	0.233923	0	0.947501	0.0467845	Aats-val	Valyl-tRNA synthetase [Source:FlyBase;Acc:FBgn0027079]
FBgn0027080	3.6794	0.470168	1.35454	1.04317	1.55049	5.9577	0.796144	0	0.432997	1.08025	Aats-tyr	Tyrosyl-tRNA synthetase [Source:FlyBase;Acc:FBgn0027080]
FBgn0027081	1.34644	0.954308	0.718681	8.06666	0.36164	4.85286	5.4081	0.5038	4.77563	2.51757	Aats-thr	Threonyl-tRNA synthetase [Source:FlyBase;Acc:FBgn0027081]
FBgn0027082	0.6536	0.04868	0	0	1.14454	0.36905	0.283777	0	0	0.424083	Aats-pro	Prolyl-tRNA synthetase [Source:FlyBase;Acc:FBgn0027082]
FBgn0027083	0.650783	0.567933	0.65824	0.156232	0.021501	0.473246	0.266381	0.197756	0	0.137799	Aats-met	Methionyl-tRNA synthetase [Source:FlyBase;Acc:FBgn0027083]
FBgn0027084	0.981541	0.618122	1.08446	6.36928	0.0254075	1.89247	1.66307	0	2.01659	0.119487	Aats-lys	Lysyl-tRNA synthetase [Source:FlyBase;Acc:FBgn0027084]
FBgn0027085	0.393788	0.0737841	0.619996	0.358108	0.236562	0.734176	0.0286748	0	0	0.133501	Aats-leu	Leucyl-tRNA synthetase [Source:FlyBase;Acc:FBgn0027085]
FBgn0027086	2.04192	1.74053	3.46391	0.600224	0	0.179048	0.34249	0	0.194261	0.709458	Aats-ile	Isoleucyl-tRNA synthetase [Source:FlyBase;Acc:FBgn0027086]
FBgn0027087	0.867764	1.67916	8.97009	9.53311	1.39312	5.24348	4.86489	3.40314	3.71127	4.2325	Aats-his	Histidyl-tRNA synthetase [Source:FlyBase;Acc:FBgn0027087]
FBgn0027088	1.2215	2.25938	0.133386	5.53683	0.514593	1.55318	2.18535	0	0.926826	0.670166	Aats-gly	Glycyl-tRNA synthetase [Source:FlyBase;Acc:FBgn0027088]
FBgn0027090	0	0	0	0.521798	0	1.87077	0.603317	0	0	0.316754	Aats-gln	Glutaminyl-tRNA synthetase [Source:FlyBase;Acc:FBgn0027090]
FBgn0027091	0	0	0	0.468243	0	0	0.0450645	0	0	0	Aats-cys	Cysteinyl-tRNA synthetase [Source:FlyBase;Acc:FBgn0027091]
FBgn0027093	1.06981	2.07058	1.43146	2.98852	0	0.0924588	0.452901	0	1.15863	0.479468	Aats-arg	Arginyl-tRNA synthetase [Source:FlyBase;Acc:FBgn0027093]
FBgn0027094	1.10599	1.218	3.5327	0.997783	1.77572	0.66052	0.684037	0	0.848022	0.297236	Aats-ala	Alanyl-tRNA synthetase [Source:FlyBase;Acc:FBgn0027094]
FBgn0027095	21.1049	20.3088	7.71585	13.0096	8.55017	31.8817	24.4153	18.8159	27.783	9.58853	Manf	Mesencephalic astrocyte-derived neurotrophic factor ortholog [Source:FlyBase;Acc:FBgn0027095]
FBgn0027101	15.4281	20.9393	28.8615	23.2561	25.9695	23.7156	18.3511	78.5836	13.244	17.7148	Dyrk3	Dual-specificity tyrosine phosphorylation-regulated kinase 3 [Source:FlyBase;Acc:FBgn0027101]
FBgn0027108	0.587672	1.24539	0.987072	0.38406	1.64909	3.46644	1.48688	3.1463	1.40956	3.19163	Inx2	Innexin 2 [Source:FlyBase;Acc:FBgn0027108]
FBgn0027111	262.212	318.716	214.12	234.393	176.052	278.603	269.016	286.374	224.384	186.67	miple	miple [Source:FlyBase;Acc:FBgn0027111]
FBgn0027259	5.65076	5.66035	22.0242	16.4834	9.38682	4.67654	8.15437	17.985	16.5562	2.35117	Kmn1	kinetochore Mis12-Ndc80 network component 1 [Source:FlyBase;Acc:FBgn0027259]
FBgn0027279	0.200442	0.650124	3.13952	2.3517	0.278906	1.03903	1.11903	5.96978	1.01634	0.709709	l(1)G0196	lethal (1) G0196 [Source:FlyBase;Acc:FBgn0027279]
FBgn0027280	1.16767	2.63757	0.0445426	1.89013	4.22336	7.6888	8.12033	3.23175	7.41233	4.99313	l(1)G0193	lethal (1) G0193 [Source:FlyBase;Acc:FBgn0027280]
FBgn0027287	0.137256	0.426499	1.58342	1.21212	0.4793	0.462506	0.439792	0.73259	0.719617	0.605504	Gmap	Golgi microtubule-associated protein [Source:FlyBase;Acc:FBgn0027287]
FBgn0027291	14.6085	14.9371	15.0291	25.828	13.5031	15.994	15.0244	25.7356	14.6684	20.9123	l(1)G0156	lethal (1) G0156 [Source:FlyBase;Acc:FBgn0027291]
FBgn0027296	1.57551	1.14029	0	0.0829522	0.0684967	0.866986	1.33975	0	1.48458	0.0751632	temp	tempura [Source:FlyBase;Acc:FBgn0027296]
FBgn0027329	4.08081	2.55112	8.46916	5.42664	3.52216	2.46384	5.84667	4.74543	3.62384	4.11035	Tcp-1zeta	T-cp1zeta [Source:FlyBase;Acc:FBgn0027329]
FBgn0027334	0.153361	0.299849	1.99372	0	0	0	2.39766	0	0	0	l(1)G0004	lethal (1) G0004 [Source:FlyBase;Acc:FBgn0027334]
FBgn0027335	1.29667	2.2829	4.46021	2.08005	1.70181	1.59287	1.81454	5.67966	1.46746	0.177852	Rip11	Rab11 interacting protein [Source:FlyBase;Acc:FBgn0027335]
FBgn0027338	18.7322	25.3268	29.9877	28.0062	16.7018	24.0315	22.7221	25.0888	37.645	21.1051	Kap-alpha3	karyopherin alpha3 [Source:FlyBase;Acc:FBgn0027338]
FBgn0027339	36.8019	34.5542	109.361	77.9015	37.1508	73.7551	52.4109	168.529	63.9911	51.1298	jim	jim [Source:FlyBase;Acc:FBgn0027339]
FBgn0027341	0.210086	0.603384	1.16871	0.575018	0.0557409	0	0.0760119	0.307228	0	0.0611659	Gfat1	Glutamine:fructose-6-phosphate aminotransferase 1 [Source:FlyBase;Acc:FBgn0027341]
FBgn0027342	0.168876	1.14745	0	1.74995	1.77353	1.42557	1.5135	4.61137	0.296031	0.774066	fz4	frizzled 4 [Source:FlyBase;Acc:FBgn0027342]
FBgn0027343	1.82208	0	0	0	0	0.261566	0	0	0	0	fz3	frizzled 3 [Source:FlyBase;Acc:FBgn0027343]
FBgn0027356	2.09731	1.2926	0.0192418	3.77857	0.468894	1.06012	0.969054	0.413282	0	0.69179	Amph	Amphiphysin [Source:FlyBase;Acc:FBgn0027356]
FBgn0027358	0.716052	1.40688	6.00266	1.32111	0	1.6303	1.02159	5.59766	2.52941	0.987786	Tim9b	Translocase of inner membrane 9b [Source:FlyBase;Acc:FBgn0027358]
FBgn0027359	17.6901	20.7929	9.53125	12.6207	6.57635	10.299	12.6322	7.26609	11.7021	8.62975	Tim8	Tim8 [Source:FlyBase;Acc:FBgn0027359]
FBgn0027360	43.0866	42.117	71.0747	17.8258	16.808	39.8972	27.3932	3.62001	27.9758	12.7756	Tim10	Translocase of inner membrane 10 [Source:FlyBase;Acc:FBgn0027360]
FBgn0027363	3.51702	2.18976	1.31901	5.60725	2.2144	2.90071	2.21902	10.9767	1.53121	3.90523	Stam	Signal transducing adaptor molecule [Source:FlyBase;Acc:FBgn0027363]
FBgn0027375	0.53581	0.764365	1.40647	1.68324	0.115171	0.433029	1.44951	0.236803	0.5154	0.600653	RecQ5	homolog of RecQ [Source:FlyBase;Acc:FBgn0027375]
FBgn0027376	0	0.0556824	0.498273	0	0	0.676383	0.0590179	0	0.944636	0.0712366	rha	rha [Source:FlyBase;Acc:FBgn0027376]
FBgn0027378	3.54973	4.50684	0.157453	0.574609	0	1.15142	1.93194	7.28477	12.628	1.86235	MRG15	MRG15 [Source:FlyBase;Acc:FBgn0027378]
FBgn0027453	5.55887	5.82098	6.81428	6.87045	1.90227	5.19823	1.90913	8.25828	9.57163	5.23465	Dnz1	DNZDHHC/NEW1 zinc finger protein 11 [Source:FlyBase;Acc:FBgn0027453]
FBgn0027490	0.0411494	0.422261	0	0	0	0.193623	0.0198512	0	0	0.0753063	D12	D12 [Source:FlyBase;Acc:FBgn0027490]
FBgn0027491	15.4189	23.6224	25.2904	29.7263	19.1208	34.8971	19.2348	47.6045	24.7475	14.9572	Cdk5alpha	Cdk5 activator-like protein [Source:FlyBase;Acc:FBgn0027491]
FBgn0027492	25.5149	22.8645	62.848	42.3882	22.5115	23.9773	18.1621	53.5184	22.2868	22.3789	wdb	widerborst [Source:FlyBase;Acc:FBgn0027492]
FBgn0027493	3.67737	1.94605	0.663323	0.559708	0.179733	1.70757	1.37721	18.3167	0.387204	2.14936	AdSS	Adenylosuccinate Synthetase [Source:FlyBase;Acc:FBgn0027493]
FBgn0027494	0	1.26705	0	0	0	1.96481	1.11912	0	3.12656	0	RpS10a	Ribosomal protein S10a [Source:FlyBase;Acc:FBgn0027494]
FBgn0027495	2.3583	0.373762	1.93455	2.12289	4.63701	1.72418	1.98169	7.40783	3.19572	1.96722	CG8378	BcDNA.LD29892 [Source:UniProtKB/TrEMBL;Acc:Q7KMH5]
FBgn0027496	7.91307	10.0815	0.745464	8.39295	0.663682	7.26572	10.2202	0	2.95798	6.12231	epsilonCOP	Coat Protein (coatomer) epsilon [Source:FlyBase;Acc:FBgn0027496]
FBgn0027497	2.03975	1.69554	4.30917	7.54963	1.72333	1.84562	1.77175	10.0112	2.42079	2.24181	Madm	MLF1-adaptor molecule [Source:FlyBase;Acc:FBgn0027497]
FBgn0027498	0.396366	0.602326	2.25192	1.34855	3.81915	0.281436	1.11884	0	0.436758	2.9111	CG2061	CG2061, isoform D [Source:UniProtKB/TrEMBL;Acc:M9PH85]
FBgn0027499	4.19782	6.17488	9.14237	8.03675	3.72766	8.45674	5.51352	7.11921	8.74721	2.13071	wde	windei [Source:FlyBase;Acc:FBgn0027499]
FBgn0027500	0	0.078526	0.109998	0.102627	0	0	0.28025	0	0	0	spd-2	spindle defective 2 [Source:FlyBase;Acc:FBgn0027500]
FBgn0027503	1.92366	0.853885	0.648377	1.4187	0.497528	0.965508	0.644398	0.077065	0.0388413	0.6981	CG11970	BcDNA.LD23876 [Source:UniProtKB/TrEMBL;Acc:Q9Y0Z1]
FBgn0027504	4.19179	6.29233	7.01543	8.28538	4.2419	5.71195	3.23155	15.8008	3.63502	4.1514	CG8878	BcDNA.LD23371 [Source:UniProtKB/TrEMBL;Acc:Q7KMI3]
FBgn0027505	0	0.0300024	4.1056	0.00970739	0.0427507	0.142153	0.228215	0	0	0.472223	Rab3-GAP	Rab3 GTPase activating protein [Source:FlyBase;Acc:FBgn0027505]
FBgn0027506	0.400191	0.404512	0.681512	0.275547	0.303373	0.585089	1.06346	0	0.385258	0.749023	EDTP	Egg-derived tyrosine phosphatase [Source:FlyBase;Acc:FBgn0027506]
FBgn0027507	4.18516	5.73071	3.35828	5.50141	0.935493	2.14288	3.05965	5.67505	0.722475	4.47668	CG1344	CG1344, isoform A [Source:UniProtKB/TrEMBL;Acc:A1Z6G6]
FBgn0027508	0.0314508	0.0234244	0.149967	0.576024	2.1863	0.155387	0.178275	0	0.456996	0.00392434	Tnks	tankyrase [Source:FlyBase;Acc:FBgn0027508]
FBgn0027509	0	0.960568	3.01675	0.780625	0.346169	1.5877	0.130223	0	0.331599	0.247003	CG7261	LD16031p [Source:UniProtKB/TrEMBL;Acc:Q9VQ78]
FBgn0027512	7.29904	1.52548	6.50204	4.98542	0.763668	3.5424	1.88317	0	5.84907	0.955081	CG10254	Uncharacterized protein, isoform A [Source:UniProtKB/TrEMBL;Acc:Q9XZ32]
FBgn0027513	0	0	0	0.865316	0	0.640263	0	0	0	0.191564	ana2	anastral spindle 2 [Source:FlyBase;Acc:FBgn0027513]
FBgn0027514	0.884837	1.11693	0.152238	0.914496	0.205168	0	0.782361	0	0.25677	0	CG1024	AT31036p [Source:UniProtKB/TrEMBL;Acc:B9A0M7]
FBgn0027515	4.8648	1.87652	7.70259	6.09382	4.78026	5.86835	4.48356	13.1781	5.39742	3.23205	CG7115	CG7115, isoform A [Source:UniProtKB/TrEMBL;Acc:Q9XZ28]
FBgn0027518	0	0.867733	0	0.242719	0	0.616682	0.0081063	0	0.537852	1.11567	CG7609	CG7609, isoform C [Source:UniProtKB/TrEMBL;Acc:Q86BR7]
FBgn0027521	0	0	0	0	0	0	0.0174445	0	0.649227	0	CG3679	CG3679, isoform A [Source:UniProtKB/TrEMBL;Acc:Q9XZ22]
FBgn0027524	7.19267	8.46107	9.78266	1.86132	0.358624	4.90628	6.19454	13.07	8.13254	3.05988	CG3909	CG3909 [Source:UniProtKB/TrEMBL;Acc:Q9XZ19]
FBgn0027525	8.65268	6.82485	0.313092	6.8358	5.29614	4.73739	3.13945	0	6.68632	3.18982	CG7686	CG7686, isoform B [Source:UniProtKB/TrEMBL;Acc:A0A0B4LF59]
FBgn0027526	17.6287	1.45887	2.21479	0.666403	3.3475	6.52619	7.67063	3.57455	0.0727918	0	Ublcp1	Ubiquitin-like domain-containing C-terminal domain phosphatase 1 [Source:FlyBase;Acc:FBgn0027526]
FBgn0027528	0.351521	2.27922	0.708021	3.08954	0.192963	0.342204	1.03502	2.41729	3.04568	0.961928	CG9634	Protein gone early [Source:UniProtKB/Swiss-Prot;Acc:Q9XZ14]
FBgn0027529	7.1634	3.85232	11.8144	11.1012	5.90287	3.53533	3.35901	10.5052	2.51429	2.02566	CG8920	CG8920, isoform B [Source:UniProtKB/TrEMBL;Acc:Q0E910]
FBgn0027532	1.59633	1.9228	1.73653	3.27651	1.82946	2.39906	0.954571	0.213031	0.16361	1.81161	CG7139	CG7139 [Source:UniProtKB/TrEMBL;Acc:Q9XZ11]
FBgn0027535	2.83175	1.32692	4.39859	1.72525	0.195151	5.36439	2.68486	5.71614	0.495652	0.746447	botv	brother of tout-velu [Source:FlyBase;Acc:FBgn0027535]
FBgn0027537	0.803411	0.177297	1.31567	0.45372	0	0	0.313196	5.12684	0	0.00810081	Nup93-1	Nucleoporin 93kD-1 [Source:FlyBase;Acc:FBgn0027537]
FBgn0027538	0.432637	1.13727	0	11.947	0	0	0.0245543	0.574201	1.28623	0.317549	beta4GalNAcTA	beta4GalNAcTA [Source:FlyBase;Acc:FBgn0027538]
FBgn0027539	0.0927786	0.259653	5.00204	4.30911	1.75448	3.52422	0.170894	0	5.44222	0.942973	CG5807	Protein Lilipod [Source:UniProtKB/Swiss-Prot;Acc:Q9VC35]
FBgn0027544	1.0793	1.03748	4.08987	4.76079	1.0124	1.53124	1.47701	0.337323	1.92992	0.856191	CG2217	CG2217, isoform A [Source:UniProtKB/TrEMBL;Acc:Q9Y104]
FBgn0027546	0.00849357	1.50137	1.07325	3.40597	3.64174	0	0.106534	0	0	0.00847845	CG4766	Protein mab-21-like [Source:UniProtKB/Swiss-Prot;Acc:Q9Y106]
FBgn0027547	17.2194	18.3558	25.5842	19.9633	7.87445	14.9953	6.97035	0	8.73529	13.5568	CG1927	BcDNA.GH11112 [Source:UniProtKB/TrEMBL;Acc:Q9Y107]
FBgn0027548	0.0713351	0.599417	1.28664	1.52338	1.39768	0.332813	0.879992	10.5588	0.637946	0.288301	nito	spenito [Source:FlyBase;Acc:FBgn0027548]
FBgn0027549	7.44884	2.9313	2.63903	3.26461	2.16049	0.653098	1.66951	9.9285	13.0791	5.72678	CG7927	BcDNA.GH11023 [Source:UniProtKB/TrEMBL;Acc:Q9Y109]
FBgn0027550	3.25777	4.61165	5.5148	5.07222	2.23002	3.53939	2.77693	8.85322	2.11206	4.66204	CG6495	BcDNA.GH10711 [Source:UniProtKB/TrEMBL;Acc:Q9Y110]
FBgn0027552	0.14706	3.82138	0	0.0561423	0	0.484381	0.6385	0	3.04171	0.0733992	CG10863	BcDNA.GH10614 [Source:UniProtKB/TrEMBL;Acc:Q9Y112]
FBgn0027553	1.66624	2.07869	0.0248285	3.19228	3.07255	3.73393	1.53731	17.753	7.14058	2.97309	NELF-B	NELF-B [Source:FlyBase;Acc:FBgn0027553]
FBgn0027554	0.684854	1.9978	1.35216	0.309454	0	0.876116	0.939534	0	0.486748	2.15772	CG8042	BcDNA.GH10229 [Source:UniProtKB/TrEMBL;Acc:Q9Y114]
FBgn0027558	1.35954	0.232777	0	3.50982	0	5.47066	3.22656	0	0	1.7393	pgant3	polypeptide GalNAc transferase 3 [Source:FlyBase;Acc:FBgn0027558]
FBgn0027560	0	0.0688919	0	0.282351	0	0.261142	0.118993	0	0	0.19236	Tps1	Trehalose-6-phosphate synthase 1 [Source:FlyBase;Acc:FBgn0027560]
FBgn0027561	3.66044	0.673467	5.85235	2.57227	1.33658	1.95626	1.90598	2.26456	2.01182	2.25164	CG18659	Uncharacterized protein, isoform A [Source:UniProtKB/TrEMBL;Acc:A1Z7Q5]
FBgn0027564	0	0.299243	6.45015	0.704716	0	1.14873	0.873018	1.65257	0	0.904061	CG3149	Protein RFT1 homolog [Source:UniProtKB/Swiss-Prot;Acc:Q9Y123]
FBgn0027565	2.81192	2.08628	0	0	0	2.28123	0.810793	0	0.571736	0.0806584	CG5498	BcDNA.GH08385 [Source:UniProtKB/TrEMBL;Acc:Q9Y124]
FBgn0027567	11.1623	10.1556	26.0357	15.9943	9.56003	15.3606	12.5416	31.2293	16.729	8.70502	CG8108	CG8108, isoform A [Source:UniProtKB/TrEMBL;Acc:Q9VT61]
FBgn0027568	3.09823	3.99196	9.05382	3.18117	1.80705	4.16813	3.74869	10.023	2.99559	3.72739	Cand1	Cullin-associated and neddylation-dissociated 1 [Source:FlyBase;Acc:FBgn0027568]
FBgn0027569	2.26255	3.74718	2.2656	7.5557	0.774188	2.17603	3.76881	2.35801	8.23116	0.678104	cert	ceramide transfer protein [Source:FlyBase;Acc:FBgn0027569]
FBgn0027570	2.5465	0.528625	3.94406	1.57887	1.56447	0.386962	0.323963	0	0.96578	0.58042	Nep2	Neprilysin 2 [Source:FlyBase;Acc:FBgn0027570]
FBgn0027572	4.42418	1.31352	3.74071	0.562767	0	1.0559	0.941735	0	0	0.00910579	CG5009	Acyl-coenzyme A oxidase [Source:UniProtKB/TrEMBL;Acc:B5RIN5]
FBgn0027574	0.211203	0.359553	0	0.853101	4.39742	0.681406	2.34154	10.135	4.62543	0.311215	CG5815	Protein SPT2 homolog [Source:UniProtKB/Swiss-Prot;Acc:Q8IMP6]
FBgn0027575	6.8974	5.64855	9.26235	9.98229	10.7362	7.6928	7.45081	27.1283	6.30557	6.0358	GABA-B-R2	metabotropic GABA-B receptor subtype 2 [Source:FlyBase;Acc:FBgn0027575]
FBgn0027579	0.32087	0	0	0	0	2.37168	0.0598777	0	0.69266	0.37091	mino	minotaur [Source:FlyBase;Acc:FBgn0027579]
FBgn0027580	1.60281	1.3995	2.97417	3.49229	1.13946	1.76095	1.58556	1.69186	0.775187	1.7556	CG1516	Pyruvate carboxylase [Source:UniProtKB/TrEMBL;Acc:Q0E9E2]
FBgn0027581	8.01098	7.44628	9.16195	19.6605	7.41092	11.5446	9.18048	12.3062	11.2875	5.5167	CG6191	CG6191, isoform C [Source:UniProtKB/TrEMBL;Acc:A0A0B4KF19]
FBgn0027582	2.67074	0.321098	3.21382	1.42428	0.25719	0	0.909005	0	0.646416	1.09113	CG6230	Cation-transporting ATPase [Source:UniProtKB/TrEMBL;Acc:Q9VKJ6]
FBgn0027583	0.858837	2.60973	4.10891	1.97882	2.08564	0.62985	1.00159	0.47269	2.67312	5.73424	CG7601	Dehydrogenase/reductase SDR family protein 7-like [Source:UniProtKB/Swiss-Prot;Acc:Q9Y140]
FBgn0027587	1.96274	1.55753	0.859586	3.45549	1.41221	2.40763	1.96484	1.4132	1.6324	2.05614	CG7028	CG7028, isoform C [Source:UniProtKB/TrEMBL;Acc:X2JAG8]
FBgn0027588	2.766	7.88547	9.42295	17.6645	6.62941	9.15335	8.33266	2.04254	6.97155	11.3502	CG14476	BcDNA.GH04962 [Source:UniProtKB/TrEMBL;Acc:Q7KMM4]
FBgn0027589	12.7643	12.0712	16.6699	15.4124	9.86411	23.6298	21.3218	56.2108	20.0731	20.2919	CG1688	BcDNA.GH04802 [Source:UniProtKB/TrEMBL;Acc:Q7KMM5]
FBgn0027590	5.09533	0.747612	0	0	0	0	2.11593	26.4226	0	0.505153	GstE12	Glutathione S transferase E12 [Source:FlyBase;Acc:FBgn0027590]
FBgn0027592	0.992954	0.855172	0.18855	3.94724	1.21236	1.29003	2.43325	6.6528	3.5233	2.07009	MED15	Mediator complex subunit 15 [Source:FlyBase;Acc:FBgn0027592]
FBgn0027594	7.68116	4.60755	11.4285	6.51829	2.76363	3.81677	5.17575	12.7005	4.01162	3.04432	drpr	draper [Source:FlyBase;Acc:FBgn0027594]
FBgn0027596	0.0608045	2.9106	4.05908	0.104113	0	0.0114174	0.54189	0.324427	0	0.367356	CG10249	Kank, isoform D [Source:UniProtKB/TrEMBL;Acc:A8DYE0]
FBgn0027597	3.29553	7.63049	11.6202	9.32961	0	12.536	9.57242	0	1.16884	3.39355	CG17712	BcDNA.GH03377 [Source:UniProtKB/TrEMBL;Acc:Q9Y153]
FBgn0027598	3.2914	1.99986	5.74454	4.82185	2.54759	1.92204	2.99814	9.63428	1.70121	1.75385	cindr	CIN85 and CD2AP orthologue [Source:FlyBase;Acc:FBgn0027598]
FBgn0027599	1.7066	0.4203	1.92047	0.236892	1.65182	0	1.51486	0	1.51806	1.3827	CG2790	CG2790 [Source:UniProtKB/TrEMBL;Acc:Q9W0X8]
FBgn0027600	2.21897	0	0.10908	0	0	0	0	0	0	0	obst-B	obstructor-B [Source:FlyBase;Acc:FBgn0027600]
FBgn0027601	0.846964	0	0.0362258	0.169474	0.428297	1.4754	1.34748	9.03532	6.10218	0.43235	pdgy	pudgy [Source:FlyBase;Acc:FBgn0027601]
FBgn0027602	0.140723	0.291646	0.700186	0.713163	0.536134	0.301088	0.69294	0.184063	0	0	CG8611	Probable ATP-dependent RNA helicase CG8611 [Source:UniProtKB/Swiss-Prot;Acc:Q86B47]
FBgn0027603	3.1771	2.8824	1.39337	4.8094	2.33116	3.22244	1.80517	3.59894	4.01105	3.42986	Ulp1	Ulp1 [Source:FlyBase;Acc:FBgn0027603]
FBgn0027607	1.10586	0.549091	2.42328	1.22276	0.793934	5.00451	0.784536	5.2185	0	2.37823	CG8230	Dymeclin [Source:UniProtKB/Swiss-Prot;Acc:Q7KNA0]
FBgn0027608	226.169	252.491	467.036	401.556	211.677	158.351	73.4657	250.123	113.601	94.1854	CG2082	BcDNA.GH02439 [Source:UniProtKB/TrEMBL;Acc:Q9Y164]
FBgn0027609	1.56461	0.867321	3.45593	2.18398	1.60237	5.04285	0.947705	4.16999	3.77191	0.387372	morgue	modifier of rpr and grim, ubiquitously expressed [Source:FlyBase;Acc:FBgn0027609]
FBgn0027610	4.57918	0.763823	6.56754	0.551766	1.55668	4.69177	4.15698	0.269058	2.51455	3.17829	Dic1	Dicarboxylate carrier 1 [Source:FlyBase;Acc:FBgn0027610]
FBgn0027611	0.196382	0.0566186	0	0	0.363054	0	0.152803	0	0.256138	0	LM408	Lysosomal alpha-mannosidase [Source:FlyBase;Acc:FBgn0027611]
FBgn0027615	7.45019	0.0603115	0	1.84413	1.67585	1.71462	0.468777	0	3.86245	0	CG6404	BcDNA.GH02220 [Source:UniProtKB/TrEMBL;Acc:Q9Y171]
FBgn0027616	3.66499	4.16689	10.2831	6.28307	3.30178	7.34965	5.63398	6.5102	5.51147	4.45151	YT521-B	YT521-B [Source:FlyBase;Acc:FBgn0027616]
FBgn0027617	0.103286	0.0683799	0	0.132751	0	0.486001	1.38378	0	0	0	CG5808	CG5808 [Source:UniProtKB/TrEMBL;Acc:Q9XYZ6]
FBgn0027619	8.85365	18.6495	0.601666	12.4876	4.82093	9.02463	5.74222	18.2416	1.09831	5.35311	Adam	Adam [Source:FlyBase;Acc:FBgn0027619]
FBgn0027620	1.12455	0.726433	2.967	3.57154	1.59802	1.60613	0.849145	0.234376	0.605099	0.503388	Acf1	ATP-dependent chromatin assembly factor large subunit [Source:FlyBase;Acc:FBgn0027620]
FBgn0027621	0.233617	0.745542	5.51134	0.476967	0.787552	2.53894	0.939942	18.9556	0.863324	0.409029	Pfrx	6-phosphofructo-2-kinase [Source:FlyBase;Acc:FBgn0027621]
FBgn0027654	2.01944	0	7.63114	11.7986	0	29.0903	2.07027	24.6958	2.65533	3.49085	jdp	jdp [Source:FlyBase;Acc:FBgn0027654]
FBgn0027655	0.130859	0.0595608	0.138661	0.178701	0.0658532	0.0667051	0.0876785	1.55827	0.248015	0.0679541	htt	huntingtin [Source:FlyBase;Acc:FBgn0027655]
FBgn0027657	11.8567	7.94091	5.62443	11.577	13.2663	0	0	0	0	2.84422	glob1	globin 1 [Source:FlyBase;Acc:FBgn0027657]
FBgn0027660	0.922558	0	0	0	0.0258968	0	0.0294288	0	0	0	blot	bloated tubules [Source:FlyBase;Acc:FBgn0027660]
FBgn0027779	9.69439	11.4731	9.99755	11.564	2.31695	7.53652	6.17059	4.22668	8.4322	4.86554	VhaSFD	Vacuolar H[+]-ATPase SFD subunit [Source:FlyBase;Acc:FBgn0027779]
FBgn0027780	0	0.869864	2.59878	0.946281	0	0	0.60157	5.88689	0.0327924	0.00662106	U26	U26 [Source:FlyBase;Acc:FBgn0027780]
FBgn0027783	0.789791	0.0950681	0.613396	0	0.228601	0	0.12123	0	0.58464	0.0119452	SMC2	Structural maintenance of chromosomes 2 [Source:FlyBase;Acc:FBgn0027783]
FBgn0027784	8.87278	1.56239	0.925774	2.12513	6.49061	6.95152	3.25686	0	13.1088	4.55348	Prp18	Prp18 [Source:FlyBase;Acc:FBgn0027784]
FBgn0027785	64.8097	65.3849	53.1457	69.2383	49.5058	39.3332	34.8997	23.2846	25.9053	28.7931	NP15.6	NP15.6 [Source:FlyBase;Acc:FBgn0027785]
FBgn0027786	7.68226	4.96697	20.6375	5.27393	2.57787	3.5785	7.13885	0.982279	0.427082	2.92613	Mtch	Mitochondrial carrier homolog 1 [Source:FlyBase;Acc:FBgn0027786]
FBgn0027788	0	0.0853084	0	0.138013	0	0	2.00302	11.9883	1.56783	1.51494	Hey	Hairy/E(spl)-related with YRPW motif [Source:FlyBase;Acc:FBgn0027788]
FBgn0027791	1.90276	0.62001	3.93396	0.171954	0	0.461649	0.344221	3.354	0	0.267099	O-fut2	O-fucosyltransferase 2 [Source:FlyBase;Acc:FBgn0027791]
FBgn0027793	3.34852	0	0	1.40618	0	3.36961	1.21554	0	2.56928	0	CG14787	EG:BACN32G11.4 protein [Source:UniProtKB/TrEMBL;Acc:Q9W591]
FBgn0027794	0.768862	0.430708	1.30039	0	0.962452	0.185527	0.475529	0.724873	0.774967	0.649417	CG14786	EG:BACN32G11.3 protein [Source:UniProtKB/TrEMBL;Acc:Q9W592]
FBgn0027795	0.801598	0.181552	0.167643	3.0366	1.25371	0.516144	0	4.01914	0.355382	0	CG14785	EG:BACN32G11.2 protein [Source:UniProtKB/TrEMBL;Acc:Q9W593]
FBgn0027835	1.66674	2.45881	1.08625	2.9758	1.1517	1.12215	2.00338	3.56307	3.49181	0.613186	Dp1	Dodeca-satellite-binding protein 1 [Source:FlyBase;Acc:FBgn0027835]
FBgn0027836	1.19829	0.859859	1.77779	1.15186	2.45723	2.08154	1.3085	2.34794	0.454321	0.580285	Dgp-1	Dgp-1 [Source:FlyBase;Acc:FBgn0027836]
FBgn0027841	0	0.563663	0	3.68077	0	1.55391	4.08242	13.3671	1.85452	1.4594	CstF-64	Cleavage stimulation factor 64 kilodalton subunit [Source:FlyBase;Acc:FBgn0027841]
FBgn0027844	0	1.93329	0	3.5845	0	0.0963144	0	0	1.79305	3.04786	CAH1	Carbonic anhydrase 1 [Source:FlyBase;Acc:FBgn0027844]
FBgn0027864	0	0.115948	0	0	0	2.8019	0.131428	0	0	0	Ogg1	Ogg1 [Source:FlyBase;Acc:FBgn0027864]
FBgn0027865	18.8783	20.102	31.4759	20.1542	13.63	31.8809	22.638	27.9258	23.1161	19.4093	Tsp96F	Tetraspanin 96F [Source:FlyBase;Acc:FBgn0027865]
FBgn0027866	4.06332	3.05212	5.27996	2.60464	1.14706	2.267	2.49836	5.42178	4.5357	1.60247	CG9776	Zinc finger matrin-type protein CG9776 [Source:UniProtKB/Swiss-Prot;Acc:Q9V468]
FBgn0027868	0.53433	1.76598	1.09478	0.515071	0.106328	0.0707126	0.692758	0	0.0281308	0.26669	Nup107	Nucleoporin 107kD [Source:FlyBase;Acc:FBgn0027868]
FBgn0027872	3.61615	2.95733	0	0.1051	3.16282	0.923446	0.718837	4.37332	1.65314	0	rdgBbeta	rdgBbeta [Source:FlyBase;Acc:FBgn0027872]
FBgn0027873	0.150969	0.402915	0	0.0181909	0	0.186471	0.573538	0	0	0.235469	Cpsf100	Cleavage and polyadenylation specificity factor 100 [Source:FlyBase;Acc:FBgn0027873]
FBgn0027885	19.0319	12.6431	31.2426	17.16	14.5208	15.209	13.5787	29.6274	9.89214	9.39669	Aac11	Aac11 [Source:FlyBase;Acc:FBgn0027885]
FBgn0027889	0.347939	1.09615	0.286049	0.300702	0	0.23711	0.0578801	0	0	0	ball	ballchen [Source:FlyBase;Acc:FBgn0027889]
FBgn0027903	1.62826	0	0	0.209276	0.115204	1.68555	0.872779	0	0	0.0722382	CG12018	DNA polymerase delta small subunit [Source:UniProtKB/Swiss-Prot;Acc:Q9W088]
FBgn0027930	0	0	0	0	0	2.32514	0.718027	2.73054	1.18165	0	MP1	Melanization Protease 1 [Source:FlyBase;Acc:FBgn0027930]
FBgn0027932	18.147	12.8692	43.3216	26.5651	16.546	13.2918	18.361	25.0273	13.9322	13.0007	Akap200	A kinase anchor protein 200 [Source:FlyBase;Acc:FBgn0027932]
FBgn0027945	1.86592	3.67455	0	4.02414	0	2.58932	2.8988	0	10.4429	3.28323	ppl	pumpless [Source:FlyBase;Acc:FBgn0027945]
FBgn0027948	1.75305	3.01617	2.37763	3.76692	1.02429	3.15739	1.06593	6.86977	0.458118	0.408198	msps	mini spindles [Source:FlyBase;Acc:FBgn0027948]
FBgn0027950	13.4618	18.628	26.4011	23.5459	22.3329	16.875	14.6082	0.814105	38.5403	22.2135	MBD-like	MBD-like [Source:FlyBase;Acc:FBgn0027950]
FBgn0027951	0.744789	1.54332	3.01473	2.83892	1.62874	1.5617	1.74834	5.62853	2.27594	0.393774	MTA1-like	MTA1-like [Source:FlyBase;Acc:FBgn0027951]
FBgn0028292	2.24725	4.65868	4.43993	2.69869	1.19783	1.66623	1.64259	1.98063	1.65714	1.46463	ric8a	ric8a [Source:FlyBase;Acc:FBgn0028292]
FBgn0028325	9.19307	7.21041	10.8003	9.22047	3.96229	8.39209	10.4895	4.07672	5.62597	4.88775	l(1)G0334	lethal (1) G0334 [Source:FlyBase;Acc:FBgn0028325]
FBgn0028327	26.9009	21.4703	46.3029	20.7243	17.0512	31.2215	17.9711	10.548	46.4462	19.2334	l(1)G0320	lethal (1) G0320 [Source:FlyBase;Acc:FBgn0028327]
FBgn0028331	7.25768	9.97069	19.9206	10.6578	11.3485	8.85146	6.4786	28.7472	9.18023	6.40912	l(1)G0289	lethal (1) G0289 [Source:FlyBase;Acc:FBgn0028331]
FBgn0028336	5.27	5.78075	10.3373	11.3684	1.35993	12.3299	8.09181	22.2341	6.76418	13.0623	l(1)G0255	lethal (1) G0255 [Source:FlyBase;Acc:FBgn0028336]
FBgn0028341	24.2208	34.2471	65.6575	44.7601	26.1773	23.1051	25.1892	60.1781	24.1172	23.6374	l(1)G0232	lethal (1) G0232 [Source:FlyBase;Acc:FBgn0028341]
FBgn0028342	118.445	113.652	125.717	117.365	48.836	90.7431	89.7473	80.4539	143.981	92.4089	l(1)G0230	lethal (1) G0230 [Source:FlyBase;Acc:FBgn0028342]
FBgn0028343	0.812374	0.135483	0.916666	1.04014	3.17226	0.789798	0.616277	4.22864	0.083579	1.20325	l(1)G0222	lethal (1) G0222 [Source:FlyBase;Acc:FBgn0028343]
FBgn0028360	1.36598	1.40926	9.51685	1.79956	1.51415	0.342798	1.28866	5.93574	1.76431	1.62869	l(1)G0148	lethal (1) G0148 [Source:FlyBase;Acc:FBgn0028360]
FBgn0028369	47.2379	48.1388	111.847	83.9889	69.8697	87.5645	68.6994	173.638	82.0839	67.319	kirre	kin of irre [Source:FlyBase;Acc:FBgn0028369]
FBgn0028370	0.0300415	0.921625	0.0596862	0.173752	0.668239	19.2853	21.93	73.2181	19.4659	18.7579	kek3	kekkon-3 [Source:FlyBase;Acc:FBgn0028370]
FBgn0028371	3.41235	2.63344	9.77127	4.39632	0.470427	0.202529	0.0103821	1.07904	0.90641	1.39072	jbug	jitterbug [Source:FlyBase;Acc:FBgn0028371]
FBgn0028372	0.0830919	0.160462	0	0.302586	0.235159	1.06444	0.0624059	0	0	0.156672	isopeptidase-T-3	isopeptidase-T-3 [Source:FlyBase;Acc:FBgn0028372]
FBgn0028374	0.0525215	2.89472	0.813925	3.08833	0.390186	1.03796	2.07766	0	0.442415	0.340782	Hug	Hugin [Source:FlyBase;Acc:FBgn0028374]
FBgn0028375	0	0.0780637	0	0	0	0.255665	1.20453	0	0.963146	0	heix	heixuedian [Source:FlyBase;Acc:FBgn0028375]
FBgn0028377	0	0	0.822669	1.49679	0	0	0.428323	0	0	0	gdl-ORF39	gdl-ORF39 [Source:FlyBase;Acc:FBgn0028377]
FBgn0028380	4.44159	0	0	2.98405	0	0.0693625	0	0	0.931288	0.82158	fal	falten [Source:FlyBase;Acc:FBgn0028380]
FBgn0028382	5.83851	8.57216	0.865831	9.74812	2.96478	5.12642	6.0914	0	7.43593	2.09143	cyp33	cyclophilin-33 [Source:FlyBase;Acc:FBgn0028382]
FBgn0028387	4.0788	3.99845	10.3577	5.51531	2.50319	9.82638	6.0132	14.3578	1.14684	2.01265	chm	chameau [Source:FlyBase;Acc:FBgn0028387]
FBgn0028396	6.05175	0	0	4.08954	0.264854	33.6425	26.6665	18.456	9.45963	10.6495	TotA	Turandot A [Source:FlyBase;Acc:FBgn0028396]
FBgn0028397	2.01633	0.406061	3.80814	2.29491	0.270714	9.12749	2.96804	29.9332	5.67287	1.81109	Tob	Tob [Source:FlyBase;Acc:FBgn0028397]
FBgn0028398	23.6147	22.1206	9.69891	0.573869	12.7417	38.2369	26.1828	2.98492	31.3421	17.6299	Taf10	TBP-associated factor 10 [Source:FlyBase;Acc:FBgn0028398]
FBgn0028399	14.2082	15.617	11.1027	15.3573	10.1669	15.3701	14.5769	21.1307	18.8617	8.02426	TMS1	TMS1 [Source:FlyBase;Acc:FBgn0028399]
FBgn0028400	30.9836	25.9546	48.2088	42.4046	15.2662	48.0648	36.2905	46.5867	37.4198	25.9885	Syt4	Synaptotagmin 4 [Source:FlyBase;Acc:FBgn0028400]
FBgn0028402	4.08752	1.33308	0.647287	3.69301	0.832398	0.510996	1.42616	0	0	1.35506	Sin	Sex-lethal interactor [Source:FlyBase;Acc:FBgn0028402]
FBgn0028407	2.10575	0.633154	0	0	0	0	0.270745	0	0	3.00984	Drep-3	DNA fragmentation factor-related protein 3 [Source:FlyBase;Acc:FBgn0028407]
FBgn0028408	12.4841	7.12212	33.086	17.9941	11.1246	10.0869	8.00056	23.785	11.2495	7.5332	Drep-2	DNA fragmentation factor-related protein 2 [Source:FlyBase;Acc:FBgn0028408]
FBgn0028410	0	0	4.56397	0	0	0	0.0188467	0	0	0	Pk34A	Pk34A [Source:FlyBase;Acc:FBgn0028410]
FBgn0028411	34.4695	20.7836	0	22.27	16.6526	36.7899	32.0698	0	1.37244	21.0385	Nxt1	NTF2-related export protein 1 [Source:FlyBase;Acc:FBgn0028411]
[truncated: 6,908 more rows]
