# Supplementary material for: Drosophila Fezf coordinates laminar-specific connectivity through cell-intrinsic and cell-extrinsic mechanisms
Source: eLife. 2018 Mar 7;7:e33962. doi: 10.7554/eLife.33962 (PMC5854465; doi:10.7554/eLife.33962)
Supplement: Supplementary file 3. [file elife-33962-supp3.xlsx]

## Sheet: joinInformation_full_sigGenes
id	bioCategory	location	geneFamily	dFezf1-A	dFezf1-B	dFezf1-C	dFezf1-D	dFezf1-E	FRT40-A	FRT40-B	FRT40-C	FRT40-D	FRT40-E	log2FoldChange	stat	pvalue	padj	symbol
FBgn0051361	cell_surface		dpr	0	0.0505453	0.0303374	0	0	46.9462	46.852	137.994	60.6158	46.9809	-10.7609	-19.8771	6.41983e-88	5.20135e-84	dpr17
FBgn0034286	cell_surface		dpr	35.8092	32.3556	62.1906	53.0107	37.2357	0	0.0261891	0	0	0.0358045	10.2637	19.233	1.95947e-82	7.93781e-79	dpr13
FBgn0040726	cell_surface		dpr	0	0	0.0732845	0	0	95.7851	102.975	272.152	142.781	131.232	-12.2936	-19.0331	9.07907e-81	2.45196e-77	dpr
FBgn0259677	cell_surface		LRR	39.5495	37.8795	106.019	76.092	46.5466	1.45526	2.13412	2.37506	3.08028	1.4075	4.68644	15.3321	4.66538e-53	9.44974e-50	CG42346
FBgn0035816				32.1346	28.0712	55.2217	61.2554	35.4036	1.9048	1.05362	3.36768	1.45303	2.01141	4.38102	14.9647	1.24802e-50	2.02229e-47	CG13685
FBgn0010105	cell_surface	Cytoplasm, Membrane		107.077	95.904	155.433	97.2456	53.0283	3.8642	2.83579	1.83844	1.33498	0.690332	5.35636	14.4852	1.5024e-47	2.02874e-44	comm
FBgn0267001		Membrane		11.5174	8.45284	27.2097	16.9161	11.1983	1.01887	0.954738	1.33322	0.705763	0.957395	3.81028	14.1991	9.27983e-46	1.07407e-42	Ten-a
FBgn0261046	cell_surface		ig_super	0	0	0	0	0	10.8734	9.67542	12.4315	8.14549	11.5508	-11.0798	-14.0831	4.82316e-45	4.88465e-42	Dscam3
FBgn0015399	cell_surface		LRR	1.0928	1.01575	0.940031	2.37958	0.544387	26.0249	20.9152	59.6508	18.4449	20.0768	-4.36695	-13.637	2.41153e-42	2.17091e-39	kek1
FBgn0003430	TF	Nucleus		50.0004	45.9156	70.7071	63.2517	56.447	0.0988533	0.523637	0.263338	0	0.034952	7.4785	13.3533	1.13342e-40	9.18294e-38	slp1
FBgn0035010	cell_surface			0	0	0	0	0	14.3141	10.378	17.1058	10.2779	11.955	-10.3342	-13.1749	1.2244e-39	9.01829e-37	CG13579
FBgn0264503				0.00663287	0.286528	0.245113	0.191814	0.161907	32.7987	14.7159	51.0323	26.7878	15.4403	-6.60414	-13.121	2.49754e-39	1.68626e-36	CG43902
FBgn0004567	TF	Nucleus		18.0063	13.4841	41.0103	19.5719	10.7741	0	0	0	0	0	9.95349	12.543	4.34085e-36	2.70535e-33	slp2
FBgn0264707				76.3841	64.9908	96.0949	88.9139	34.78	10.7388	9.35584	22.9457	10.3464	6.55616	2.63958	12.2628	1.43442e-34	8.30122e-32	RhoGEF3
FBgn0000633	cell_surface		ig_super	1.27261	0.35226	0.183091	0.514665	0.0853836	31.0555	33.699	107.097	40.2485	32.6565	-5.99715	-12.1729	4.33272e-34	2.34025e-31	fas
FBgn0024944		Plasma membrane		0	0	0	0	0	5.65267	5.72718	19.2986	16.3317	4.86294	-9.55842	-11.7837	4.73407e-32	2.39721e-29	Oamb
FBgn0044328				0	0	0	0.154979	0	134.422	152.124	306.887	176.77	135.058	-8.6995	-11.6062	3.83125e-31	1.82593e-28	CG32052
FBgn0038498	cell_surface		beat	2.13788	1.22599	1.61526	0.566001	0.223697	31.6937	34.1738	62.8807	39.9737	33.5666	-4.83832	-11.5875	4.76939e-31	2.14676e-28	beat-IIa
FBgn0263354				0	0	0	0	0	4.92399	5.00319	20.0672	2.72235	3.27901	-9.37089	-11.5145	1.11526e-30	4.75571e-28	CG42784
FBgn0026616				5.25291	3.6703	5.78271	4.36059	2.76786	0.0332972	0.0386844	0	0	0	7.10909	11.476	1.74247e-30	7.05874e-28	alpha-Man-IIb
FBgn0004364	cell_surface		LRR	0.103479	0.0316189	0.455466	0.0613843	0	18.0681	8.10245	28.995	12.8737	11.8909	-6.34957	-11.2218	3.18858e-29	1.23018e-26	18w
FBgn0263873		Nucleus		23.0714	21.7028	55.4729	31.6286	21.0262	0.555621	0.431735	3.6655	0.332791	0.372286	4.85328	10.9872	4.40397e-28	1.62186e-25	sick
FBgn0004449	cell_surface	Cytoplasm, Membrane	EGF	0.156783	0.732685	0.231649	1.06682	0.411091	17.3762	12.536	32.9884	12.3105	10.5464	-4.62203	-10.8836	1.38013e-27	4.86165e-25	Ten-m
FBgn0026160	TF			15.2618	15.451	32.4241	23.0929	17.8577	1.55332	1.13491	2.6139	0.315138	1.13644	3.89821	10.6977	1.04346e-26	3.52256e-24	tna
FBgn0028490				0	0	0	0	0	6.35239	3.03743	19.319	18.9858	6.84416	-8.82743	-10.6816	1.24161e-26	4.02383e-24	CG31705
FBgn0259241				0	0	0	0.0377127	0	11.6252	12.2332	12.358	5.40465	9.45088	-8.63708	-10.6599	1.56843e-26	4.88747e-24	CG42339
FBgn0037546				0	0	0	0	0	2.24448	3.36766	6.03372	5.21977	2.32641	-8.5491	-10.527	6.48544e-26	1.94611e-23	mAChR-B
FBgn0260971	membrane_transporter			6.75729	7.67024	16.5834	12.7533	6.35752	0	0.12624	0.022623	0	0.0800499	6.50506	10.5213	6.89152e-26	1.99411e-23	CG42594
FBgn0261929	cell_surface			0.00546838	0	0	0	0	2.49356	4.44044	24.331	1.44637	4.2225	-8.94338	-10.5162	7.27497e-26	2.03248e-23	5-HT2B
FBgn0015773	cell_surface	Secreted (curated)		0.00687068	0	0	0	0	32.0678	2.55823	18.7734	4.46779	5.65242	-8.94117	-10.479	1.07884e-25	2.91359e-23	NetA
FBgn0011666	RNA_binding,translation_regulation			6.14694	1.5934	11.7973	4.80555	2.48738	67.3142	61.9132	177.847	77.8716	47.5349	-3.81133	-10.3161	5.95793e-25	1.55714e-22	msi
FBgn0037993	cell_surface		dpr	0	0	0	0	0	7.73188	4.07141	12.4511	3.6567	1.03236	-8.42759	-10.1759	2.53946e-24	6.42959e-22	dpr15
FBgn0259821				82.5819	84.1936	155.921	134.312	94.4986	15.4099	8.42935	37.6645	13.8908	7.51075	2.84605	9.92117	3.3678e-23	8.26845e-21	CG42402
FBgn0033652	cell_surface			11.199	9.21835	18.9276	11.677	10.5486	45.2519	45.2985	106.502	54.8522	38.833	-2.10966	-9.58468	9.27486e-22	2.21014e-19	ths
FBgn0050115	gef			0.00808816	0	0	0.00779663	0.022142	1.26375	1.74473	2.40822	3.77902	2.04726	-6.79887	-9.54635	1.34342e-21	3.10982e-19	GEFmeso
FBgn0011818		Nucleus		95.1193	77.6918	192.63	139.178	72.3384	29.8642	25.6078	31.8382	25.6715	22.1826	2.02081	9.24	2.46494e-20	5.54748e-18	oaf
FBgn0000535	kinase_activity,membrane_transporter,TF	Plasma membrane		0.00606522	0.0120464	0	0	0	2.70883	0.652433	2.22207	1.05998	1.35468	-6.8549	-9.16934	4.75928e-20	1.04215e-17	eag
FBgn0261085				38.3546	30.3875	66.4902	45.7241	26.4674	3.53433	0.50401	0.948295	3.1029	1.65457	4.04094	9.04157	1.5444e-19	3.29282e-17	Syt12
FBgn0264001	RNA_binding,translation_regulation			0	0.217822	0.445816	0.815782	0.044698	79.0589	100.652	211.669	87.3511	79.3758	-6.6146	-9.01844	1.90787e-19	3.96348e-17	bru-3
FBgn0086604	cell_surface		ig_super,sidestep	3.60177	4.26812	7.15291	6.58528	2.79715	18.3862	14.6492	36.27	19.9513	13.7384	-2.00514	-8.99699	2.31986e-19	4.69887e-17	CG12484
FBgn0261548				0.525597	0.425268	0.198296	0.149523	0.0379898	4.69253	6.53764	31.5771	10.1136	9.17638	-4.81436	-8.98669	2.54792e-19	5.03494e-17	CG42666
FBgn0262742	cell_surface			67.399	49.0504	125.861	108.195	50.8894	15.3769	10.0689	31.8966	17.7112	12.054	2.21001	8.76587	1.85337e-18	3.57524e-16	Fas1
FBgn0029082	cell_surface		ig_super	2.12468	0.406644	2.16845	3.79543	3.41818	0	0.0037989	0	0	0	7.54324	8.76208	1.91683e-18	3.61167e-16	hbs
FBgn0015774	cell_surface	Secreted (curated)	EGF	0.225274	0.00266323	1.65602	0.0650054	0.0227698	146.642	94.8322	355.155	162.419	107.425	-6.55538	-8.75808	1.98608e-18	3.6571e-16	NetB
FBgn0040333	membrane_transporter			0	0	0	0	0	0.960756	0	10.4745	0	0	-1.57711	-8.64173	5.53667e-18	9.96847e-16	brv3
FBgn0034731	RNA_binding			2.85378	1.41983	4.97677	2.77848	2.45211	23.8961	18.7664	20.531	29.627	16.2587	-2.85688	-8.62147	6.61027e-18	1.16427e-15	CG10384
FBgn0033864				0	0.0453088	0	0.0109952	0	5.02361	3.48316	11.0091	3.02656	0.597766	-6.5228	-8.56921	1.04199e-17	1.79621e-15	CG18368
FBgn0028370	cell_surface		LRR	0.0300415	0.921625	0.0596862	0.173752	0.668239	19.2853	21.93	73.2181	19.4659	18.7579	-5.15363	-8.22345	1.97734e-16	3.33759e-14	kek3
FBgn0010329				1.42618	1.50916	5.57399	5.33003	0.558293	0.0165016	0.00563945	0	0	0	6.84712	8.10179	5.41547e-16	8.95431e-14	Tbh
FBgn0033404		Membrane		1.82681	0.891152	8.46625	2.12551	3.10206	0	0.0123689	0	0	0	6.99218	8.09612	5.67378e-16	9.1938e-14	Or45a
FBgn0037295	cell_surface		dpr	0	0	0.1725	0	0	36.8707	20.4636	50.5461	37.214	22.7333	-6.13363	-8.05232	8.12374e-16	1.29056e-13	dpr16
FBgn0262509	cell_surface		ig_super	4.83734	2.3376	2.50908	0.982522	1.83702	31.1928	16.4195	61.1446	21.1314	16.6347	-3.16994	-8.0401	8.97643e-16	1.3986e-13	nrm
FBgn0034408				16.6834	20.7065	29.8218	24.4329	18.3342	4.84553	1.21588	6.62176	2.70522	2.85721	2.62346	8.03603	9.27981e-16	1.41859e-13	sano
FBgn0039283	TF	Nucleus		53.7276	32.5347	65.9234	48.3934	25.7843	0.403906	0.0376458	0	0	0	6.20256	7.98757	1.37622e-15	2.06484e-13	danr
FBgn0034476	cell_surface	Plasma membrane	LRR	0.820589	0.927984	1.72547	2.65392	0.163514	7.64987	13.8376	39.7666	15.727	13.0526	-3.60189	-7.94459	1.94839e-15	2.87016e-13	Toll-7
FBgn0034723	cell_surface		ig_super	0	0	0	0	0	0	0.176116	0	3.39549	0	-1.37081	-7.9285	2.21813e-15	3.15286e-13	CG13506
FBgn0052698				0.0155228	0.477869	2.75763	1.15431	0.76331	29.1046	25.8515	75.4263	29.0715	26.1733	-4.60155	-7.92898	2.20951e-15	3.15286e-13	CG32698
FBgn0042185		Mitochondria (membrane)		0.00867246	0.67161	0.303187	0.386013	0	26.1708	18.1134	17.6523	11.9015	16.2185	-5.20786	-7.926	2.26326e-15	3.16155e-13	CG18769
FBgn0260429				18.5005	23.3546	37.0318	21.6055	26.0275	0.391779	2.01507	3.73191	0.403812	1.64968	3.80848	7.90232	2.73766e-15	3.75941e-13	CG42524
FBgn0263220	membrane_transporter			6.87123	9.68263	32.7069	17.2956	9.0401	1.37506	1.2239	4.35435	0.572548	0.99293	3.11478	7.82172	5.21082e-15	7.03635e-13	Hk
FBgn0017590	cell_surface		ig_super	1.07192	0.784921	0.193607	0	0.310261	53.5405	90.7141	119.189	79.6859	70.8147	-5.72553	-7.81727	5.39796e-15	7.05391e-13	klg
FBgn0262160				17.6819	18.1656	41.7587	31.9147	15.7637	3.17263	2.47976	11.6337	3.18739	1.66321	2.59717	7.81793	5.36972e-15	7.05391e-13	CG9932
FBgn0085200				0	0	0	0	0	0	0.561604	16.2131	0	0	-1.32987	-7.79878	6.25102e-15	8.03901e-13	CG34171
FBgn0038140	cell_surface			0	0.057179	0	0	0	6.45584	2.17453	2.92818	3.2288	3.71131	-6.19144	-7.76571	8.119e-15	1.02781e-12	PK2-R1
FBgn0038494	cell_surface		beat	1.17583	3.41321	2.93814	3.16059	3.11978	19.3015	30.0202	51.1324	12.448	29.558	-3.08418	-7.75868	8.58158e-15	1.06966e-12	beat-IIb
FBgn0000659	ecdysone_inducible,TF	Nucleus		0	0	0	0	0	0	0.118007	3.79496	0	0	-1.31293	-7.74298	9.71105e-15	1.19211e-12	fkh
FBgn0036891				0	0	0	0	0	0	0.755134	0	0	4.1498	-1.32481	-7.7354	1.03079e-14	1.24649e-12	CG9372
FBgn0034070	cell_surface		EGF	10.2928	9.44411	22.4482	23.4536	7.61726	42.8185	53.2203	135.808	61.5264	49.0786	-2.14214	-7.72806	1.09202e-14	1.29934e-12	SP2353
FBgn0086758	TF	Nucleus		4.38925	2.80812	10.1636	7.51923	3.85829	0.162764	0.299516	0	0.225918	0.196441	4.30601	7.72637	1.10657e-14	1.29934e-12	chinmo
FBgn0039816				1.3983	0.515768	0.254	1.4891	0	23.4041	18.9265	50.3953	21.8746	17.2018	-4.51366	-7.66003	1.85891e-14	2.15155e-12	CG11317
FBgn0039286	TF	Nucleus		2.21804	4.08118	1.90563	3.08192	0.183795	0	0	0	0	0	6.53756	7.64069	2.16065e-14	2.46558e-12	dan
FBgn0036504				0	0.947343	0	0	6.58637	0	0	0	0	0	1.21102	7.58466	3.33358e-14	3.7512e-12	yellow-k
FBgn0032694				0.13587	1.62459	1.10673	0.109139	2.13886	48.3022	37.2166	43.1522	43.1087	33.8754	-4.52102	-7.56463	3.88982e-14	4.31716e-12	MESR3
FBgn0052521				9.87359	10.0299	21.6098	24.8943	4.30355	67.6168	74.8487	103.964	73.1763	48.7021	-2.37768	-7.55268	4.26404e-14	4.66855e-12	CG32521
FBgn0034396	actin_binding			77.9151	61.7773	116.631	111.995	67.3692	34.4886	21.4217	51.9522	27.9538	22.5517	1.51184	7.54976	4.3606e-14	4.71061e-12	CG15097
FBgn0002306	cell_surface	Membrane	PTP_FNIII	0.912203	0.697486	0.947708	1.01498	0.572881	0	0	0	0	0	6.37865	7.50793	6.007e-14	6.40377e-12	sas
FBgn0033327				0.705889	0	0	0	3.70936	0	0	0	0	0	1.19021	7.49727	6.5163e-14	6.85651e-12	PGRP-SC1b
FBgn0003996	membrane_transporter	Cytoplasm, Membrane		0.646142	0.729158	0.910295	1.37782	1.97412	11.3875	9.4741	28.1265	13.6729	11.1212	-3.2791	-7.46971	8.03738e-14	8.25228e-12	w
FBgn0035445				0	0	6.12247	0.801293	0	0	0	0	0	0	1.18937	7.46956	8.04653e-14	8.25228e-12	CG12014
FBgn0031490	cell_surface			2.0164	0	0.101944	0	0	0	0	0	0	0	1.18405	7.32926	2.31427e-13	2.34378e-11	CG17264
FBgn0266801				58.0031	61.9033	119.197	92.9313	47.72	0.323963	0.157331	0	0	0.426622	5.66394	7.32394	2.4079e-13	2.4085e-11	CG45263
FBgn0052206	cell_surface			2.14298	2.2562	7.81406	4.8436	1.74231	13.2507	17.0246	56.869	21.553	14.3889	-2.56512	-7.32108	2.45979e-13	2.43039e-11	CG32206
FBgn0052600	cell_surface		dpr	21.3319	22.0254	43.1734	32.266	19.7559	62.3979	60.983	140.756	74.4063	61.5217	-1.46192	-7.29612	2.96177e-13	2.89112e-11	dpr8
FBgn0039177				0.110946	0	0	4.33899	0	0	0	0	0	0	1.18237	7.28148	3.30179e-13	3.18466e-11	CG13611
FBgn0066365	cell_surface			1.78286	0.0502554	0	0	0	0	0	0	0	0	1.18187	7.27152	3.55468e-13	3.38824e-11	dyl
FBgn0053679				0	0	0	0	0	0	0.919095	20.4009	0	0	-1.19053	-7.24365	4.36759e-13	4.11467e-11	CG33679
FBgn0259247				1.60886	0.0156073	0	0	0	0	0	0	0	0	1.17958	7.23287	4.72898e-13	4.40393e-11	laccase2
FBgn0039154				0	0	0	0	0	0	0	0	12.7354	0.0443883	-1.18997	-7.2245	5.02965e-13	4.63071e-11	Npc2f
FBgn0052547	cell_surface			2.62058	1.23622	7.84358	3.95916	2.81731	0.134519	0.105888	0.746767	0.104353	0.080946	3.8733	7.20457	5.82261e-13	5.30054e-11	CG32547
FBgn0260399	kinase_activity			0	0	0	0	0	0	0.109506	3.52821	0	0	-1.18916	-7.19847	6.08938e-13	5.4818e-11	gwl
FBgn0036403				0	0	0	0	0	0.117611	0	5.3862	0	0	-1.1886	-7.18153	6.89356e-13	6.13754e-11	CG6661
FBgn0037616				0	0	0	0	0	0.0426337	0	0	3.86729	0	-1.18836	-7.1745	7.257e-13	6.39089e-11	CG8136
FBgn0011829	cell_surface,kinase_activity		cadherin	0	0	0	0	0	0.0595856	1.81487	1.97933	0.774705	1.90565	-6.09159	-7.13448	9.71531e-13	8.46381e-11	Ret
FBgn0026398		Membrane		0	0	0	0	0	6.05063	0.847459	5.28474	3.87694	2.40996	-6.12436	-7.12456	1.04412e-12	8.99942e-11	Or22a
FBgn0030720				1.31877	0	0	0.0167268	0	0	0	0	0	0	1.17239	7.10565	1.19759e-12	1.02135e-10	CG8939
FBgn0053469				0	0	0	0	0	0	0.0565938	0	11.957	0	-1.18516	-7.08789	1.36174e-12	1.14925e-10	CG33469
FBgn0029922				2.9234	4.48569	8.76024	8.87021	8.82495	0.372794	0.473011	0	0.275868	0.12359	4.16126	7.04402	1.86773e-12	1.56004e-10	CG14431
FBgn0011206	RNA_binding,translation_regulation	Cytoplasm, Nucleus		28.8473	24.5913	70.8413	70.9034	23.8765	4.52961	5.39083	8.2427	10.9703	6.61231	2.41866	7.02549	2.13319e-12	1.76358e-10	bol
FBgn0030594				0	0	0	0	0	0	0.0189818	0	1.47327	0	-1.18071	-6.98811	2.7862e-12	2.28018e-10	CG9509
FBgn0036764	membrane_transporter			0	0	0	0	0	0	0.0221825	0	1.91728	0	-1.18002	-6.97251	3.11327e-12	2.52237e-10	CG5535
FBgn0004858	TF	Nucleus		0.374988	0.073148	0	0.0515991	0.596942	9.69775	11.6645	27.9196	10.5701	9.95945	-4.6637	-6.93975	3.92788e-12	3.15086e-10	elB
FBgn0085387	membrane_transporter	Membrane		159.168	113.849	477.63	288.403	174.167	50.8333	36.1249	119.002	51.423	35.2008	2.06198	6.85149	7.30856e-12	5.80529e-10	shakB
FBgn0004885	cell_surface		EGF	9.49093	8.26332	15.9691	12.4211	4.79155	31.447	22.7181	74.7054	26.4269	23.0108	-1.69547	-6.82967	8.5113e-12	6.695e-10	tok
FBgn0032741	TF			12.9116	5.50417	2.83529	4.21696	2.74962	0	0.143426	0	0	0	5.4352	6.71974	1.82045e-11	1.4182e-09	Side
FBgn0051660				1.7854	0.272384	3.78281	2.76604	0.922564	8.41803	17.4208	38.1025	15.7358	14.1495	-3.09023	-6.71252	1.91287e-11	1.47601e-09	pog
FBgn0031220	membrane_transporter			2.8821	1.38033	2.24799	1.69677	2.25694	12.6041	9.20397	29.2332	9.58678	8.22941	-2.3977	-6.67236	2.51717e-11	1.92397e-09	CG4822
FBgn0036934	cell_surface			0.763298	0.752318	1.19682	0.596583	0.0953474	11.4861	2.90658	10.1613	5.75145	4.70984	-3.14552	-6.6314	3.32529e-11	2.51789e-09	sNPF-R
FBgn0024150				0	0.0397871	0	0	0	1.3856	0.515959	4.05105	3.82057	0.326612	-5.40164	-6.57423	4.89046e-11	3.66875e-09	Ac78C
FBgn0000636	cell_surface	Membrane	ig_super	2.26659	7.89033	1.1444	4.3414	2.21219	10.8583	44.2938	101.078	34.932	47.4776	-3.29164	-6.54208	6.0671e-11	4.46869e-09	Fas3
FBgn0030665				1.03795	2.083	3.8645	3.12497	1.11667	0	0	0	0	0	5.65327	6.54275	6.03958e-11	4.46869e-09	CG15646
FBgn0040153				3.72612	9.32064	12.4713	10.343	8.26617	30.1886	33.8488	61.0048	48.7274	29.1877	-2.08418	-6.52058	7.00357e-11	5.11198e-09	l(1)G0469
FBgn0261928				1.27958	1.00651	2.84859	3.44849	1.04783	6.94353	7.22044	25.8614	7.86726	5.62353	-2.27835	-6.50783	7.62456e-11	5.51555e-09	CG42795
FBgn0034389		Plasma membrane		0	0	0	0	0	1.31645	1.56803	1.2883	0.230253	0.277482	-5.57009	-6.46623	1.00478e-10	7.2042e-09	Mctp
FBgn0044051	cell_surface	Secreted (curated)		0	0	0	0	0	3.21055	15.4393	12.5906	3.90437	7.09126	-5.57704	-6.46128	1.03818e-10	7.37837e-09	Ilp1
FBgn0029730				3.96621	0.380029	7.80996	2.39041	1.29965	0	0	0	0	0	5.53637	6.43609	1.22589e-10	8.63665e-09	CG12681
FBgn0016797	cell_surface	Membrane		6.54086	4.8424	12.7271	7.71829	8.0557	24.8058	22.173	50.9701	25.0263	19.7578	-1.69828	-6.42823	1.29098e-10	9.01682e-09	fz2
FBgn0053087	cell_surface		EGF,LDL	0.0412856	0.121675	1.37801	0.477559	0.384445	6.74884	4.50792	10.6235	5.50185	4.2251	-3.42345	-6.41047	1.45068e-10	1.00457e-08	LRP1
FBgn0000024				1.5382	0.672877	11.2572	4.09711	2.25542	22.1631	30.0782	63.414	27.0358	25.8164	-2.94876	-6.40109	1.54272e-10	1.05924e-08	Ace
FBgn0038237		Cytoplasm		0.133691	0.0978257	0.285955	0.0678275	0	1.66868	2.04687	5.46836	1.44028	1.2081	-3.80243	-6.38678	1.69419e-10	1.15347e-08	Pde6
FBgn0031016	cell_surface		LRR	4.98326	6.7675	16.0068	10.1155	7.26296	0	0.181035	0.119735	0.885093	0.0749194	4.23377	6.33632	2.35315e-10	1.58877e-08	kek5
FBgn0026397		Membrane		0	0.0974527	0	0	0	13.7973	3.48432	1.67291	5.09203	3.1654	-5.41238	-6.30129	2.95186e-10	1.97652e-08	Or22b
FBgn0015400	cell_surface		LRR	12.4084	10.1097	24.0074	18.185	9.37381	0.0521307	1.33023	2.93175	0.834728	0.132097	3.59408	6.2923	3.12804e-10	2.07732e-08	kek2
FBgn0011828	cell_surface	Secreted (curated)	LRR	17.9468	16.5716	32.4674	34.5537	13.3711	65.0894	39.2888	117.296	70.017	49.5244	-1.51386	-6.26445	3.74143e-10	2.46448e-08	Pxn
FBgn0053516	cell_surface		dpr	0.033178	0.666612	0	0.0144389	0.422231	29.104	25.3097	69.8754	43.4921	30.9376	-4.93854	-6.23634	4.47931e-10	2.92672e-08	dpr3
FBgn0085399	cell_surface		EGF	0.0101797	0.0404363	0.011891	1.05978	0	50.8464	37.4496	94.9345	40.3704	41.5324	-4.87129	-6.22855	4.70782e-10	3.05142e-08	CG34370
FBgn0261854	kinase_activity,microtubule	Cytoplasm		0.305421	0.0234647	2.51934	0.0663535	0.0438324	23.4991	35.8353	139.012	39.1832	21.5812	-4.82625	-6.20983	5.30422e-10	3.4107e-08	aPKC
FBgn0053639	cell_surface			4.30104	5.13692	14.948	11.2441	1.58488	0	0.0523437	0	0.319891	0	4.78525	6.19839	5.70449e-10	3.63919e-08	CG33639
FBgn0262473	cell_surface	Membrane	LRR	7.10192	8.75324	18.6004	21.5594	6.17006	0.512174	1.01477	1.20574	0.00777523	0.0460699	3.95346	6.13789	8.36248e-10	5.29319e-08	Tl
FBgn0085407	cell_surface			58.4306	57.0032	121.433	90.6548	50.0681	193.076	137.029	303.642	141.625	114.751	-1.17262	-6.13239	8.65709e-10	5.43719e-08	Pvf3
FBgn0261574	cell_surface	Membrane	cadherin	2.71957	2.14803	7.03866	3.71026	1.01551	11.3543	8.319	33.4754	15.3948	9.30077	-2.12907	-6.10413	1.0336e-09	6.44172e-08	kug
FBgn0085434	membrane_transporter	Membrane		3.19931	2.45564	13.8732	5.48056	3.43038	1.44758	0.651068	0.476595	0.512474	0.550996	2.6624	6.08207	1.18639e-09	7.33751e-08	NaCP60E
FBgn0261258	cell_surface			4.17743	2.1783	3.89057	7.95174	1.03215	0	0.137748	0	0	0	4.90879	6.07982	1.20321e-09	7.38516e-08	rgn
FBgn0026189		Membrane		58.3726	46.6121	119.174	95.7037	52.9726	18.2457	19.0443	55.0749	17.2778	20.1058	1.58121	6.05816	1.37691e-09	8.38773e-08	prominin-like
FBgn0037448				3.96446	4.44355	6.29119	2.81332	3.28897	12.7591	15.8	31.5212	21.2285	7.35871	-1.91488	-6.04385	1.50478e-09	9.09829e-08	CG15186
FBgn0035432	membrane_transporter			5.26117	6.60706	9.2579	8.70257	4.69602	19.885	17.1814	49.6762	13.2633	16.8425	-1.60145	-6.02649	1.67559e-09	9.95816e-08	ZnT63C
FBgn0039431	cell_surface		ig_super	7.34748	5.98919	11.3822	10.2968	4.25921	1.25823	1.17903	3.49987	0.266543	0.996603	2.46443	6.02569	1.68386e-09	9.95816e-08	plum
FBgn0266521				48.0036	57.5534	110.801	102.001	71.1735	161.349	221.349	369.585	308.262	256.302	-1.70968	-6.02599	1.68073e-09	9.95816e-08	stai
FBgn0038693				0.356215	0.51612	1.25553	0.0932905	0.0157413	5.74572	4.29253	28.0223	4.5577	3.07109	-3.6777	-5.9645	2.45388e-09	1.44068e-07	unc79
FBgn0260866				0.167783	0.872526	0.333351	0.732824	3.31989	0	0	0	0	0.00697853	5.09075	5.85396	4.80013e-09	2.79789e-07	dnr1
FBgn0261549	kinase_activity,phototransduction			4.27291	1.94487	18.0544	8.59556	4.8203	0.0475143	0.550977	0	0.497607	0.10572	3.94103	5.81739	5.97729e-09	3.45915e-07	rdgA
FBgn0085370		Nucleus		1.72288	3.25252	6.91415	4.54275	2.74837	0.0331705	0.265353	0.0392728	0	0	4.42764	5.80428	6.46446e-09	3.71454e-07	Pde11
FBgn0051997				69.6155	107.425	62.1519	68.2485	33.4306	0.484381	0	0	3.57666	2.71066	4.28045	5.79849	6.69139e-09	3.81786e-07	CG31997
FBgn0261287				0	0	0.165551	0	0	7.97128	5.54618	10.7165	1.401	2.1498	-4.95586	-5.7329	9.8727e-09	5.59361e-07	ymp
FBgn0083972				89.697	111.757	108.053	92.4135	55.5585	4.45164	17.0391	3.84001	12.599	15.3351	2.72997	5.70397	1.17047e-08	6.58549e-07	CG34136
FBgn0032586				27.9198	35.5668	34.8484	33.6638	21.0263	88.1928	61.5656	86.16	75.174	51.7303	-1.19957	-5.65738	1.53705e-08	8.5884e-07	Tpr2
FBgn0037963	cell_surface	Membrane	cadherin	2.11879	2.69942	5.92731	2.90641	0.748516	0.348456	0.223992	1.09034	0.198032	0.090937	2.81687	5.62816	1.8214e-08	1.01075e-06	Cad87A
FBgn0033872				246.9	191.378	536.729	468.228	276.523	134.398	71.3218	182.273	128.002	93.9985	1.48589	5.60104	2.13071e-08	1.17435e-06	CG6329
FBgn0035170	cell_surface		dpr	2.76959	3.56224	6.74235	5.29128	5.96726	0	0.080488	0	0	0.291455	4.33134	5.58437	2.34546e-08	1.28398e-06	dpr20
FBgn0032123	membrane_transporter			20.7811	21.8097	35.6661	27.0651	21.45	5.2636	9.85279	10.0998	4.01578	8.60802	1.69848	5.56444	2.62991e-08	1.43003e-06	Oatp30B
FBgn0265595				16.4394	17.3601	45.5905	25.7047	11.5249	6.47604	7.08128	15.2721	5.20723	6.40419	1.50624	5.55355	2.79931e-08	1.512e-06	CG44422
FBgn0051921				0.349918	1.0143	1.71361	1.20336	0.903326	0.0266999	0	0	0	0	4.77228	5.547	2.90616e-08	1.55932e-06	CG31921
FBgn0261801				0.686807	0.274385	0	0.0760978	0.469181	9.60591	5.46881	18.1679	3.72388	5.62652	-3.72644	-5.53611	3.09265e-08	1.64847e-06	CG42747
FBgn0243486	cell_surface		LRR	4.69052	9.63838	5.57072	8.04807	2.36287	0.55654	0.302078	0.261632	0.00976775	0	3.95052	5.52158	3.35962e-08	1.77906e-06	rdo
FBgn0036331				0	0	0.184069	0	0.2185	1.67107	4.78323	16.1291	8.45371	4.82907	-4.45028	-5.51071	3.57393e-08	1.88026e-06	CG14117
FBgn0028645	cell_surface		beat	0	0	0	0	0	0.740701	1.21945	0.961485	4.94875	0.00873013	-4.3251	-5.49434	3.92179e-08	2.04996e-06	beat-Ib
FBgn0028999	TF			0.890611	1.4372	2.25606	8.12901	1.94948	0	0.120838	0	0	0	4.55413	5.46841	4.54083e-08	2.35832e-06	nerfin-1
FBgn0004635		Golgi apparatus (membrane)		1.75029	0.439016	8.60402	0.104363	0.344705	76.7199	39.8507	83.9128	73.9153	47.9301	-4.02432	-5.45827	4.80807e-08	2.48121e-06	rho
FBgn0013433	cell_surface		beat	0	0	0	0	0.0168664	0.0448674	1.46434	3.30682	1.24498	0.388667	-4.53648	-5.44395	5.21106e-08	2.67215e-06	beat-Ia
FBgn0040823	cell_surface		dpr	28.6972	33.2594	53.432	22.2405	22.6733	75.2092	82.6506	178.47	64.3474	52.521	-1.35615	-5.39442	6.87442e-08	3.50293e-06	dpr6
FBgn0036044				0.0441575	0.0109628	0	0.445429	0	2.55712	4.50433	8.79773	3.60412	2.40819	-4.17642	-5.3795	7.46912e-08	3.78218e-06	Zasp67
FBgn0033403				12.3294	8.05864	33.2168	23.9528	13.6579	0.286325	0.053019	0	0	0	3.9818	5.34992	8.79918e-08	4.42801e-06	CG13739
FBgn0051352	actin_binding			12.311	12.1483	44.9374	22.9735	17.1514	2.57995	4.5094	12.8568	4.99088	3.06055	1.98573	5.34665	8.95983e-08	4.48102e-06	Unc-115a
FBgn0029881	microtubule	Nucleus		4.02293	2.85068	10.007	6.37548	8.29036	0.91681	0.914247	3.64666	1.02333	0.87361	2.21319	5.30053	1.15465e-07	5.73923e-06	pigs
FBgn0010905	ecdysone_inducible,synapse			32.9153	33.0004	85.0325	57.4253	28.7214	18.6666	14.9913	35.4054	19.6614	11.2093	1.26058	5.28218	1.27657e-07	6.30657e-06	Spn
FBgn0033388				0.518186	0.393942	4.01956	2.22149	0.214615	0	0	0	0	0	4.47082	5.26938	1.36886e-07	6.72152e-06	CG8046
FBgn0263490				3.14541	2.45523	8.75012	5.22163	3.90163	0.743855	0.529245	0.652755	1.2742	1.02562	2.22005	5.26799	1.37928e-07	6.73189e-06	mld
FBgn0266098		Cytoplasm		4.34433	5.69569	8.26191	4.61872	2.70526	2.28031	2.00119	3.95901	1.67787	1.34924	1.22953	5.26159	1.42812e-07	6.92854e-06	rg
FBgn0010226		Cytoplasm		0.0152056	0	0.362525	0.0344255	0	5.41694	10.8909	0	4.53419	13.3427	-4.32201	-5.23568	1.64375e-07	7.92717e-06	GstS1
FBgn0027608				226.169	252.491	467.036	401.556	211.677	158.351	73.4657	250.123	113.601	94.1854	1.22893	5.23161	1.68043e-07	8.05611e-06	CG2082
FBgn0031414	cell_surface	Secreted (curated)	EGF	0.726247	0.0745101	0.0596282	0.650936	0.658274	3.79173	3.96617	12.7146	4.33145	4.00182	-3.04883	-5.22862	1.70777e-07	8.13902e-06	eys
FBgn0028916				18.8175	19.0584	42.3211	39.9639	19.7628	11.7719	5.64962	14.4844	10.7329	4.16195	1.58379	5.21804	1.80827e-07	8.5676e-06	CG33090
FBgn0034725				3.28414	15.8929	1.03339	4.14603	8.28017	58.7376	64.0327	85.4248	50.1603	54.8657	-2.78028	-5.20662	1.92307e-07	9.05854e-06	CG6044
FBgn0036849				2.57694	0.700376	2.26351	6.06633	1.61215	0	0	0	0	0	4.46442	5.19077	2.0943e-07	9.8081e-06	CG14079
FBgn0020251		Golgi apparatus (membrane)		4.12819	3.57033	7.838	6.17009	3.61651	12.8097	9.82615	14.5641	16.0466	11.0253	-1.35623	-5.18426	2.16871e-07	1.00982e-05	sfl
FBgn0033159	cell_surface		ig_super	24.9179	20.0763	62.6196	47.6388	22.5615	11.8839	8.62088	24.6244	9.31169	11.8764	1.41305	5.15848	2.48961e-07	1.15262e-05	Dscam1
FBgn0037960	cell_surface	Membrane	methuselah	16.3981	12.123	22.0843	13.7261	21.6661	72.9042	47.6582	64.8975	48.3055	60.0677	-1.65347	-5.14125	2.72919e-07	1.25636e-05	mthl5
FBgn0031955		Cytoplasm, Cytoskeleton		2.31366	2.77468	5.60773	6.38698	3.35377	13.1833	8.52498	36.2659	8.1582	12.3418	-1.73952	-5.11023	3.21773e-07	1.47288e-05	CG14535
FBgn0029123	TF			7.87124	7.34568	15.7772	17.3754	7.86778	20.391	23.041	59.6906	33.2251	22.7316	-1.41381	-5.10353	3.33384e-07	1.51746e-05	SoxN
FBgn0052227	cell_surface			5.59496	2.17103	9.50344	5.57334	5.22608	19.1515	16.9032	23.5404	15.5404	14.0472	-1.59765	-5.09101	3.56165e-07	1.61209e-05	gogo
FBgn0083949	cell_surface		ig_super,sidestep	0	0.283251	0	0	0.0137597	16.0139	16.7341	30.715	13.6076	12.3431	-3.67221	-5.06763	4.02805e-07	1.81307e-05	CG34113
FBgn0259244		Membrane		37.1155	38.1617	72.1378	52.414	27.6835	18.6423	3.56968	27.015	12.555	7.41215	1.75313	5.01732	5.23975e-07	2.34282e-05	CG42342
FBgn0053113				76.9407	104.793	86.954	100.635	61.6741	176.186	193.446	231.668	165.548	150.938	-1.04147	-5.01647	5.26281e-07	2.34282e-05	Rtnl1
FBgn0085397	cell_surface		LRR	0.893207	1.02893	6.1041	1.92006	1.19443	0.0882604	0.124961	0	0	0	4.01408	5.00267	5.65425e-07	2.50332e-05	Fili
FBgn0261556	gef			1.96529	1.59444	4.99739	4.82768	1.54141	11.5468	5.2204	25.1676	7.95266	6.38307	-1.76319	-4.9965	5.83791e-07	2.57058e-05	CG42674
FBgn0041097	cell_surface		ig_super	0.7013	1.04739	5.5391	0.138514	0.262303	14.5674	12.4252	18.444	13.4187	6.25389	-2.89039	-4.99127	5.99851e-07	2.62702e-05	robo3
FBgn0037766				42.5686	36.6352	92.3364	69.6518	35.959	26.868	15.6091	28.2736	26.7456	13.1167	1.28584	4.97429	6.54874e-07	2.85258e-05	Teh1
FBgn0013997	cell_surface	Membrane	EGF	2.40952	2.72405	2.12416	2.81766	3.09288	5.0431	10.7686	17.3625	10.7065	7.37778	-1.73949	-4.9701	6.69198e-07	2.89938e-05	Nrx-IV
FBgn0263397	membrane_transporter			41.7263	31.6224	112.938	89.0329	52.1107	0.0100407	0.137257	0	1.12156	0	3.62699	4.95805	7.12026e-07	3.06853e-05	Ih
FBgn0000719	cell_surface	Secreted (curated)		2.11916	5.29252	8.06723	2.21085	3.43354	0	0.393892	0	0	0.0567068	3.94139	4.93896	7.8541e-07	3.36687e-05	fog
FBgn0036072	cell_surface			2.50367	2.82424	7.82361	1.35902	1.23828	0.137251	0.117264	0	0	0.0242642	4.07401	4.93379	8.06496e-07	3.43907e-05	CG6628
FBgn0051475				0.243428	0.0371907	0	0	0	4.17639	1.40018	11.8297	3.92753	0.317763	-4.04156	-4.89673	9.74448e-07	4.1335e-05	CG31475
FBgn0025393				2.17762	0	0	0	0	56.1706	17.9473	22.1825	44.6907	28.4969	-4.08419	-4.88273	1.04626e-06	4.41498e-05	CG14795
FBgn0025833				0.635671	0.273965	0.363962	0.896579	0.899765	5.16846	6.73347	1.65761	4.20951	6.53848	-2.71299	-4.86971	1.11763e-06	4.69175e-05	CG8910
FBgn0050095				6.81082	4.23368	0	13.3311	11.0356	0	0	0	0	0	3.70804	4.86067	1.16987e-06	4.88571e-05	CG30095
FBgn0067628		Mitochondria		0	0.127781	0	0	0	3.98737	2.01659	2.39371	2.35813	2.09765	-4.23209	-4.84416	1.27151e-06	5.28297e-05	CG33331
FBgn0003997	ecdysone_inducible	Plasma membrane		8.98592	7.50232	17.0479	8.71995	8.2903	17.6583	19.1002	75.3193	29.8906	22.8692	-1.51809	-4.84095	1.29219e-06	5.29967e-05	hid
FBgn0040571				0.364969	0	0.177472	0	0	4.51839	5.07011	3.20927	3.47153	4.50789	-3.88757	-4.84251	1.2821e-06	5.29967e-05	CG17193
FBgn0085421				19.0511	16.2935	28.618	29.9133	10.9878	8.43318	1.21728	9.30163	0.846916	1.75811	2.28233	4.8405	1.29515e-06	5.29967e-05	Epac
FBgn0264442	ecdysone_inducible	Nucleus		0.291536	1.69348	1.57437	2.56826	0.945765	4.75615	5.29591	21.5893	9.46793	3.53998	-2.32053	-4.83522	1.32998e-06	5.39983e-05	ab
FBgn0032482				15.4589	12.9115	12.6922	7.94135	5.46339	22.6585	42.7745	44.0568	33.0096	27.066	-1.56662	-4.83478	1.33296e-06	5.39983e-05	Pect
FBgn0264881				0	0	0	0	0	31.5535	1.70264	101.261	14.2042	0.587184	-3.77385	-4.82186	1.42227e-06	5.73294e-05	CG44072
FBgn0004919	TF	Membrane		13.6893	14.5757	16.8342	19.7758	7.72126	33.2174	23.7779	73.8472	28.4425	20.6372	-1.17024	-4.81432	1.47701e-06	5.92412e-05	gol
FBgn0264089	cell_surface	Secreted (curated)	EGF	9.07141	6.81188	27.9952	29.8413	20.5515	1.11405	1.87438	12.1576	0.659105	2.07619	2.49742	4.79961	1.58972e-06	6.34477e-05	sli
FBgn0085478				3.8523	3.40472	13.3833	7.90243	5.47828	2.07907	1.494	4.03906	1.10284	1.63665	1.71154	4.77707	1.7787e-06	7.06425e-05	CG34449
FBgn0000037		Membrane		1.78431	1.01809	2.10915	3.18565	0.733895	9.48132	6.49446	12.8516	7.7688	1.75199	-1.95662	-4.77004	1.84193e-06	7.27965e-05	mAChR-A
FBgn0085395	membrane_transporter			12.4603	12.2655	26.934	20.5277	9.22356	35.3792	31.8657	93.866	24.232	26.1012	-1.24899	-4.76761	1.86427e-06	7.3322e-05	Shawl
FBgn0261262	cell_surface		EGF,EGF,LDL	1.40077	1.24312	5.81773	1.91573	3.65151	10.8405	10.6758	25.7469	9.47553	7.24617	-1.93361	-4.75925	1.94316e-06	7.60556e-05	CG42613
FBgn0036369	phosphatase_activity			15.1265	12.6172	41.5399	20.9165	10.6876	3.25271	9.00581	5.81809	5.26327	3.09144	1.76202	4.72891	2.25731e-06	8.79266e-05	CG10089
FBgn0003041	gef			0	0.00870395	0	0	0.018604	0.0509279	0.124204	0	5.7735	0.338205	-3.58898	-4.72144	2.34177e-06	9.07798e-05	pbl
FBgn0050008				0	0	0	0	0	3.81552	4.27252	0	5.61941	1.92314	-3.58288	-4.71816	2.37987e-06	9.18178e-05	CG30008
FBgn0011582		Membrane		1.0556	1.95213	8.77201	6.32198	6.0188	0.515691	0.676692	2.04974	0.869798	0.225748	2.45126	4.71196	2.45342e-06	9.42065e-05	Dop1R1
FBgn0037676				0	0	0.541389	0	0	24.528	9.33681	13.6344	11.5407	9.56143	-3.58135	-4.65673	3.21265e-06	0.000122778	CG8861
FBgn0260635		Nucleus		24.8268	31.3659	33.1799	18.637	9.68067	55.4563	46.8916	106.576	51.1259	44.3211	-1.28048	-4.63854	3.50873e-06	0.000133464	Diap1
FBgn0027589	membrane_transporter			12.7643	12.0712	16.6699	15.4124	9.86411	23.6298	21.3218	56.2108	20.0731	20.2919	-0.948895	-4.63229	3.61648e-06	0.000136919	CG1688
FBgn0030737				0.0223302	0	0	0	0	2.66431	1.02113	7.94927	0.0860736	0.980778	-3.96849	-4.62084	3.82183e-06	0.000144021	CG9914
FBgn0015519	membrane_transporter			0.435392	1.22931	2.84108	0.842196	0.922503	1.93527	6.00884	9.31003	4.7172	5.03339	-1.99757	-4.60631	4.09883e-06	0.000153744	nAChRalpha3
FBgn0264606				0.0809771	0.124772	0.261676	2.20904	0.0647804	1.4442	5.08348	20.5217	7.39983	3.03412	-3.12395	-4.57303	4.80731e-06	0.000179488	Fife
FBgn0264090				1.39262	0.266232	0.451291	0.834125	0.086096	2.58843	4.7419	7.19312	4.1513	1.95024	-2.4491	-4.53133	5.86147e-06	0.000217842	CG43759
FBgn0052183	cell_surface		PTP_FNIII	0	0.0646756	0	0.59641	0	2.18345	3.14972	5.95942	7.07695	3.6894	-3.6951	-4.52335	6.08691e-06	0.000225188	Ccn
FBgn0031952	phosphatase_activity			12.0914	9.10355	28.2956	15.2316	11.6789	5.61962	5.04896	10.0112	6.9358	2.82351	1.34207	4.49592	6.92689e-06	0.000255098	cdc14
FBgn0004876	kinase_activity			14.7766	17.6559	50.8591	29.2842	17.7191	5.63395	9.48661	17.3446	11.0729	6.00109	1.37024	4.46117	8.15128e-06	0.000298831	cdi
FBgn0051676				148.38	124.497	194.275	213.514	101.535	103.287	28.209	45.1544	31.5907	43.9813	1.55596	4.45859	8.2502e-06	0.000301095	CG31676
FBgn0051619	cell_surface			3.10064	3.23784	8.88886	3.85314	2.2935	13.1507	10.3944	11.7384	10.2309	7.12908	-1.33218	-4.45428	8.41745e-06	0.000305821	CG31619
FBgn0264975		GPI anchored (membrane)		11.2552	12.8749	43.7661	28.651	13.71	8.4036	7.40857	14.3184	3.06661	4.80256	1.51892	4.44366	8.84425e-06	0.000319894	Nrg
FBgn0037414			osi	12.5167	0.108887	0.623377	0	0.0179029	0	0.0244135	0.0422894	0	0	3.32748	4.44171	8.92482e-06	0.000321373	Osi7
FBgn0036617				0	0	0	0	0	0.452592	1.36996	0	7.755	2.33179	-3.1631	-4.44042	8.97827e-06	0.000321867	Cpr72Ea
FBgn0004108	cell_surface	Membrane		67.888	66.466	144.21	142.656	59.276	41.5856	39.4271	39.1754	50.0359	28.1872	1.18168	4.43846	9.06061e-06	0.000323388	Nrt
FBgn0266429				3.20977	3.98612	8.50285	1.46837	3.31028	0.614365	0.180798	0	0	0.012068	3.49525	4.43386	9.25589e-06	0.000328909	AstA-R1
FBgn0036821				7.73871	7.71726	22.069	12.7829	4.49346	0.806195	1.29877	7.33359	0.355291	1.22363	2.32008	4.42487	9.65015e-06	0.000341422	CG3961
FBgn0051523				2.10221	0.102461	0.814202	0.421028	0.496183	4.82774	5.78933	11.2694	10.4734	2.51839	-2.66078	-4.42346	9.71307e-06	0.000342153	CG31523
FBgn0038641	membrane_transporter	Membrane		4.33826	3.66739	11.0564	9.91666	8.51871	2.72606	1.96922	1.04921	1.72694	1.6308	1.88453	4.42061	9.84225e-06	0.000345203	CG7708
FBgn0259734				1.07885	1.23586	4.8022	2.49665	1.81531	0.488885	0.158282	1.09908	0.138188	0.156926	2.44461	4.41887	9.92177e-06	0.000346492	CG42388
FBgn0265487		Membrane, Nucleus		22.1368	6.43052	39.0582	34.4935	13.6642	3.2376	4.56682	0.0766644	0.824307	2.84657	2.71411	4.4168	1.00173e-05	0.000348327	mbl
FBgn0038589				36.4014	46.441	37.3452	88.5858	57.4801	9.68639	1.2517	0	0	0.906327	3.43861	4.40411	1.06217e-05	0.000367765	CG18598
FBgn0050418	cell_surface		PTP_FNIII	0.168363	0.358275	0.688121	4.45151	0.391402	14.6899	5.80927	5.14535	17.5993	7.27475	-2.81654	-4.37946	1.18972e-05	0.000410173	nord
FBgn0027546		Cytoplasm		0.00849357	1.50137	1.07325	3.40597	3.64174	0	0.106534	0	0	0.00847845	3.74437	4.37512	1.21364e-05	0.000416648	CG4766
FBgn0013278		Cytoplasm		47.0095	59.8415	61.5375	43.568	29.9507	112.892	78.7442	138.569	79.9536	64.9977	-0.900398	-4.37089	1.23741e-05	0.000423018	Hsp70Bb
FBgn0019968	microtubule			5.82151	4.10336	8.65538	9.36635	3.34944	20.0315	7.37939	40.6817	13.7897	9.92628	-1.38812	-4.3674	1.25736e-05	0.000428029	Khc-73
FBgn0032487	RNA_binding			0.0314808	0.864768	0	0	0.534567	10.0096	4.28271	37.7242	4.13918	6.8647	-3.52998	-4.35997	1.3008e-05	0.000440966	Ski6
FBgn0028523	cell_surface		LRR	0	0	0	0	0	0.0786546	2.31169	0	4.52927	0.59792	-2.96053	-4.31761	1.57728e-05	0.000532465	CG5888
FBgn0038139	cell_surface			0	0.00863411	0	0	0	3.60831	0.536877	0	0.0146475	1.32788	-3.19579	-4.29285	1.76394e-05	0.000593007	PK2-R2
FBgn0016032	cell_surface	Membrane	tetraspanin	0	0	0	0	0	1.89728	3.47775	0	5.60934	1.49412	-3.1096	-4.2442	2.19373e-05	0.000728426	lbm
FBgn0033140				62.2177	41.3855	34.3062	40.6522	20.842	122.767	104.168	106.405	125.172	84.2396	-1.39149	-4.24456	2.1902e-05	0.000728426	CG12836
FBgn0003435	RNA_binding			48.7787	27.6127	113.542	73.895	42.8664	24.3904	16.2416	57.7262	18.5361	14.2511	1.29667	4.24173	2.21805e-05	0.000733496	sm
FBgn0045038	cell_surface			0	0.0124897	0	0	0	1.02972	0.594598	7.81939	0	0.273548	-3.28134	-4.23219	2.31426e-05	0.000762201	Proc
FBgn0040397				0.141432	0.32103	1.37556	0.00973813	0	2.05143	5.01706	15.2969	2.5614	4.33888	-3.18087	-4.2288	2.34939e-05	0.000770638	CG3655
FBgn0260941		Plasma membrane		2.34051	3.81929	7.1318	6.23399	6.75661	19.1802	18.7332	22.8236	10.6746	10.8353	-1.48465	-4.22424	2.3975e-05	0.000783247	app
FBgn0036576				20.0995	19.6875	42.5966	26.4665	15.5853	15.0834	9.50915	17.8309	13.4219	9.03977	0.923458	4.22113	2.43075e-05	0.000790923	CG5151
FBgn0029733	membrane_transporter			2.31445	1.91954	0	0.269684	1.4576	0	0	0	0	0	3.05459	4.21788	2.46612e-05	0.000799221	CG6927
FBgn0052062	RNA_binding,TF			10.4986	7.90274	30.1012	18.6335	9.00181	39.774	29.1067	112.71	25.8504	21.4742	-1.41261	-4.19853	2.68659e-05	0.000867202	A2bp1
FBgn0044049	cell_surface	Secreted (curated)		0	0	0	0	0	0.733118	1.21692	3.71995	4.12474	0.999815	-3.44427	-4.18731	2.82279e-05	0.000904747	Ilp4
FBgn0000064		Nucleus		7.55575	4.85174	7.47017	9.09462	5.42429	12.7279	16.2075	29.8012	11.6772	20.3286	-1.31179	-4.18711	2.82524e-05	0.000904747	Ald
FBgn0037614				21.9753	11.9457	46.7551	23.743	16.0883	10.2234	8.2438	17.2428	9.24695	6.02458	1.24114	4.1785	2.93435e-05	0.000935989	CG8116
FBgn0035802	gef			6.05179	4.38314	11.4218	19.5821	9.47046	3.36681	0.376922	2.43982	0.0461855	0.677305	2.63677	4.16684	3.08849e-05	0.000981293	CG33275
FBgn0032189		Secreted (weakly likely)		0	0	0	0	0	4.31627	2.18312	0	0.446444	1.66856	-3.00032	-4.1621	3.1534e-05	0.000998001	Ripalpha
FBgn0040877				0	0	0	0	0	6.66289	2.3421	0	0.265062	1.30131	-2.92539	-4.15731	3.22018e-05	0.00101517	CG12994
FBgn0003218	membrane_transporter,phototransduction	Nucleus		4.18419	4.24607	10.0186	6.69087	3.5471	2.50561	1.96216	2.66889	0.608175	1.82033	1.50592	4.15349	3.27448e-05	0.00102829	rdgB
FBgn0051955				0	0.287966	0	0	0	32.3375	23.7257	0	0.10656	14.3312	-3.24694	-4.15229	3.29159e-05	0.00102967	CG31955
FBgn0052373	cell_surface			11.0253	3.18677	1.35041	3.98704	1.48186	0	0.387308	0	0	0	3.53205	4.14759	3.35992e-05	0.001047	CG32373
FBgn0028888	cell_surface		LRR	2.30212	2.05823	12.4335	3.00196	3.26014	1.05003	0.163435	0	0.22954	0.0110276	3.07611	4.13315	3.5782e-05	0.00111075	CG4168
FBgn0052529				22.9056	17.4864	47.4914	42.8641	21.2883	13.775	10.7871	25.2914	16.2193	8.87109	1.04086	4.12212	3.75408e-05	0.0011609	Hers
FBgn0034072	cell_surface			3.17803	1.8238	4.38249	4.59417	1.65863	6.88734	5.3605	11.1541	6.3031	4.72141	-1.0946	-4.11557	3.86224e-05	0.0011898	Dg
FBgn0032296		Cytoplasm		0	0.014902	0	0.0144652	0	0.0211829	0.637052	0	4.55055	0.172263	-3.26223	-4.11075	3.94371e-05	0.0012103	CG6729
FBgn0001991	membrane_transporter	Membrane		3.40732	4.77678	8.22796	7.65798	2.84611	2.70749	1.21648	4.01619	2.28312	1.2511	1.24209	4.09739	4.17838e-05	0.00127748	Ca-alpha1D
FBgn0032955	kinase_activity			5.851	5.99916	11.0056	9.59181	6.19498	3.68022	2.05889	4.79953	1.13821	1.98583	1.53381	4.09386	4.24243e-05	0.00128735	CG2201
FBgn0261244	phototransduction			0.082244	0.0169919	0	1.18391	0	6.59138	4.50389	9.75109	3.16738	3.02667	-3.2815	-4.09467	4.22766e-05	0.00128735	inaE
FBgn0039054	cell_surface	Secreted (highly likely)		15.3103	13.5559	25.6826	24.3148	18.6286	10.6889	9.12753	17.2339	9.45359	5.89751	0.982616	4.09136	4.2885e-05	0.00129647	CG13830
FBgn0265959		Cytoplasm		0.00478578	0.028162	0.392147	0.0546731	0.30097	0.880693	0.423554	8.06964	2.73278	2.28438	-3.09439	-4.0781	4.54057e-05	0.00136757	rdgC
FBgn0032801				0	0	0	0	0	0.0960756	0.722343	27.4707	0	1.08704	-2.56256	-4.06559	4.79115e-05	0.00143239	CG10165
FBgn0053531	cell_surface,kinase_activity			4.68817	3.35559	6.32982	8.99484	4.54902	0.605057	1.59496	0.075331	1.32726	0.229964	2.41978	4.0557	4.99839e-05	0.00148886	Ddr
FBgn0036801				0.144595	0.534214	0.111205	0.496548	0	1.14181	3.2912	4.04589	1.69733	2.41912	-2.76812	-4.04881	5.14782e-05	0.00152775	MYPT-75D
FBgn0262617	kinase_activity			0.340811	0.695243	0.964981	0.70534	0.497938	1.95478	1.90988	3.09198	1.395	1.17999	-1.45063	-4.02965	5.58607e-05	0.00165176	CG43143
FBgn0037153				0.0228647	0.126145	1.65356	0.333058	0	8.83649	5.30683	11.7954	7.37448	5.91396	-3.24632	-4.01653	5.90606e-05	0.00174003	olf413
FBgn0035563				0	0	0	0	0	1.10714	0.567547	126.822	1.32132	3.52311	-2.79814	-4.01083	6.05067e-05	0.00177618	CG13716
FBgn0052057	cell_surface		dpr	50.3464	59.8195	124.664	131.12	57.1184	50.0569	35.8784	72.6074	23.9352	23.3656	1.08117	4.0003	6.32619e-05	0.00184613	dpr10
FBgn0032135		Golgi apparatus (membrane)		37.284	20.2665	50.9078	41.12	28.8279	13.4324	7.49785	24.7934	4.17778	14.3629	1.4959	3.99999	6.33452e-05	0.00184613	GlcAT-S
FBgn0032368	microtubule			1.05143	1.06842	11.4845	1.17852	2.02415	0	0.188736	0	0	0	3.51985	3.99716	6.41064e-05	0.00185961	spag4
FBgn0038143				9.04849	8.93585	21.7992	27.0288	18.6456	6.63998	2.94073	13.5651	4.16872	3.52316	1.58018	3.99657	6.42668e-05	0.00185961	CG9813
FBgn0000043	ecdysone_inducible	Cytoplasm, Cytoskeleton		80.9159	114.93	87.8699	111.857	58.5516	154.538	171.344	231.571	162.837	131.283	-0.853437	-3.98488	6.75151e-05	0.00194664	Act42A
FBgn0050401				0	0	0	0	0	2.16656	0.95197	0.409231	0.554078	0.984909	-3.22569	-3.97363	7.07864e-05	0.00203373	CG30401
FBgn0052432	cell_surface		LDL	1.13049	0.150621	0.769882	0.758637	0.15591	0	0.051927	0	0	0.00488843	3.45471	3.95951	7.51023e-05	0.0021501	CG32432
FBgn0030400				8.08253	7.22656	16.5779	16.6146	10.4529	17.7636	20.9636	78.2183	25.9787	20.3757	-1.26539	-3.95384	7.6907e-05	0.00219402	CG11138
FBgn0053513	membrane_transporter			0.00630966	0	0.210605	0.42452	0.575893	2.68985	3.43925	11.563	3.95642	1.82339	-3.01882	-3.94446	7.99815e-05	0.00227372	Nmdar2
FBgn0029930				3.24648	0.408095	4.04744	4.16076	0.881684	0	0.237897	0	0	0	3.391	3.94037	8.13553e-05	0.00229666	CG12541
FBgn0031265				0	0	0	0	0	1.88958	0.161984	9.3662	0	0	-2.21586	-3.94066	8.12576e-05	0.00229666	CG2794
FBgn0010240	membrane_transporter	Membrane		29.3263	28.8677	49.1612	36.8609	46.3148	19.05	12.2087	8.23831	17.8518	8.34551	1.48889	3.93206	8.42223e-05	0.00236934	Lcch3
FBgn0038653	cell_surface			0.384891	0.351989	0.876164	0.926496	0.516952	0	0.0671379	0.151251	0	0.0282185	3.0098	3.9276	8.57987e-05	0.00240533	CG18208
FBgn0027788	TF	Nucleus		0	0.0853084	0	0.138013	0	0	2.00302	11.9883	1.56783	1.51494	-3.33601	-3.92387	8.71388e-05	0.00243296	Hey
FBgn0023023				60.884	73.4411	80.5778	52.4059	36.8433	28.1776	29.2906	17.9295	22.9215	25.6736	1.19465	3.92319	8.73847e-05	0.00243296	CRMP
FBgn0036485		Golgi apparatus (membrane)		12.7815	2.29281	6.9246	6.55772	6.1697	31.8037	20.5948	28.6312	14.264	20.0093	-1.57052	-3.89923	9.64995e-05	0.00267753	FucTA
FBgn0005636	TF			0	2.54833	2.9813	1.36563	0.721089	3.24451	14.2345	25.5129	14.2913	14.1422	-2.70471	-3.88562	0.000102069	0.00282239	nvy
FBgn0003091	kinase_activity	Cytoplasm		8.73471	5.17486	8.21571	12.6708	4.76833	0	0.592105	0	0	0.0258621	3.22673	3.88341	0.000103002	0.00283851	Pkc53E
FBgn0039030				0	0	0	0	0.253192	0.134706	4.39642	17.5835	5.26509	0.690615	-3.18653	-3.87254	0.000107707	0.0029581	CG6660
FBgn0029746				3.46578	5.47788	6.8505	4.23613	2.23865	0.113527	0.414732	3.61901	0.143017	0.0446002	2.45561	3.87122	0.000108291	0.0029641	CG15465
FBgn0034136	membrane_transporter	Plasma membrane		1.24667	0.6886	0.773838	2.01948	0.78289	0.0833046	0	0.184931	0	0	3.24394	3.86337	0.000111832	0.00305071	DAT
FBgn0034397				0.312962	0.99897	4.26371	5.47336	0	0	0	0	0	0	2.73283	3.84448	0.000120807	0.00328449	CG15082
FBgn0043364	TF			3.77285	6.24687	11.0831	6.22412	9.01227	2.07592	0.775955	0	0.832292	0.986301	2.4758	3.83864	0.00012372	0.00334748	cbt
FBgn0263079				0	0	0	0	0	0.976083	0.592163	6.8039	0	0	-2.20185	-3.83818	0.00012395	0.00334748	CG43338
FBgn0036890				80.0766	95.0507	130.592	129.938	64.3219	165.803	140.56	211.255	167.676	172.836	-0.794835	-3.83668	0.000124707	0.00335674	CG9368
FBgn0051721		Nucleus		1.29129	1.04592	1.44492	0.319878	0.318537	5.7026	1.80965	9.98286	2.87829	1.98749	-1.98379	-3.83469	0.000125722	0.00337285	Trim9
FBgn0020647				4.98956	3.38663	11.3743	8.49534	4.48141	11.4616	9.66572	25.9465	12.4965	13.5546	-1.11841	-3.82071	0.000133069	0.00355817	KrT95D
FBgn0034736				0	0	0	0	0	2.55535	0.686988	1.69426	0	0.228888	-2.65051	-3.81648	0.00013537	0.00360779	CG6018
FBgn0031106				1.03124	0.547182	0.39556	0.0768492	0.338439	5.62689	3.01496	3.79737	7.62204	1.51204	-2.59394	-3.81352	0.000137004	0.00363937	Syx16
FBgn0001197	chromatin_assembly	Nucleus		79.5196	105.925	77.1456	99.3817	29.0662	219.857	180.357	214.21	147.443	108.388	-1.11168	-3.80421	0.000142258	0.0037543	His2Av
FBgn0031894				2.85262	1.63634	5.52732	3.72971	1.52388	0.73461	0.358417	0.314402	0.158438	0	2.70999	3.80448	0.000142104	0.0037543	CG4496
FBgn0266084				0.185889	0.0598699	1.29363	0.329319	0.0639837	0.978691	2.29276	6.65016	1.7859	1.68506	-2.45776	-3.80333	0.000142762	0.00375539	Fhos
FBgn0000473	ecdysone_inducible	ER (membrane)		5.64917	4.14651	5.54585	2.42334	0.0306673	0	0.278799	0	0	0	3.25575	3.79918	0.000145177	0.00380656	Cyp6a2
FBgn0034606				2.12226	0.0297535	2.05963	1.46332	0.360376	0.0422938	0.139849	0	0	0.00996932	3.21012	3.79518	0.000147538	0.00385597	ASPP
FBgn0261836	actin_binding,RNA_binding			1.09695	0.985729	3.18256	1.99008	0.898558	1.93722	4.14126	12.746	3.6672	2.13636	-1.40787	-3.78724	0.000152329	0.00395568	Msp300
FBgn0036860				3.71135	2.00167	0.0381398	1.51122	0	0	0	0	0	0	2.55591	3.78796	0.00015189	0.00395568	CG14086
FBgn0087012				0.231962	0.0767844	0	0	0	1.48837	1.93455	2.36132	1.20789	0.891734	-3.15268	-3.78499	0.000153714	0.00397889	5-HT2A
FBgn0053200		Secreted (weakly likely)		18.8869	8.11065	0.203323	8.16074	12.4725	111.928	74.7789	89.5785	70.8038	36.0929	-2.40217	-3.78052	0.000156502	0.00403815	ventrally-expressed-protein-D
FBgn0038828				141.27	121.516	109.065	100.569	138.955	45.5397	63.6447	108.33	44.5331	49.8745	1.11385	3.77746	0.000158438	0.00407513	CG17270
FBgn0052457				0.470977	1.04426	2.90293	0	0	10.7814	9.34483	31.0796	5.5944	9.55767	-2.97757	-3.7764	0.00015911	0.00407945	CG32457
FBgn0027930				0	0	0	0	0	2.32514	0.718027	2.73054	1.18165	0	-2.63992	-3.7748	0.000160134	0.0040799	MP1
FBgn0039344				0	0	0	0	0	0.231116	0.0658199	6.15677	0	1.44366	-2.45687	-3.77491	0.000160068	0.0040799	CG4582
FBgn0040383	ecdysone_inducible,membrane_transporter			0	0	0	0	0	2.94412	1.11799	0	3.02222	0.145757	-2.59161	-3.76597	0.000165904	0.00421365	CG5254
FBgn0003090		Cytoplasm		0	0	0	0	0	0.397037	0.0359357	0	0.341462	0.740076	-2.57926	-3.76307	0.000167838	0.00424945	pk
FBgn0013726	actin_binding			100.458	72.7419	111.874	91.6401	77.3721	55.4259	31.5606	43.435	44.02	46.7094	1.01158	3.75628	0.000172458	0.00435282	pnut
FBgn0261555		Nucleus		3.21211	1.68417	8.99126	7.07079	0.852252	0.845403	0.224864	1.8583	1.03995	0.372185	2.09501	3.7549	0.000173409	0.00436323	CG42673
FBgn0003870	TF	Nucleus		0.0154271	0	0	0	0	0	0.200435	0.278244	2.2178	0.179662	-2.95803	-3.74694	0.000179007	0.00449013	ttk
FBgn0053988				3.52009	4.29337	15.071	12.2511	7.77037	18.3738	13.8296	64.8898	21.2775	14.2289	-1.41069	-3.74297	0.000181858	0.00454758	Mid1
FBgn0052262				0.0513427	0	0	0.0494921	0	3.40637	0.0495373	10.9407	0	2.43444	-3.0442	-3.73299	0.000189217	0.00471703	CG32262
FBgn0010452	cell_surface		LRR	2.10112	1.24012	2.07938	4.87878	0.42074	8.82332	7.17822	5.66498	6.66768	7.32108	-1.76084	-3.73204	0.000189936	0.00472043	trn
FBgn0085409	cell_surface,kinase_activity			16.0532	14.7323	28.2078	29.9904	14.9383	3.6377	6.7109	22.896	3.35174	6.62644	1.38154	3.72423	0.000195909	0.00485169	CG34380
FBgn0013334		Cytoplasm		33.9938	22.1279	63.2644	62.9704	36.6285	26.0088	15.6365	37.7436	20.4206	13.3607	1.0031	3.72358	0.000196415	0.00485169	Sap47
FBgn0046692	kinase_activity	Cytoplasm		23.7654	35.7453	24.0834	16.0555	17.3494	8.6209	11.8889	12.0627	10.0029	7.71268	1.23181	3.70148	0.000214344	0.00527845	Stlk
FBgn0014184		Nucleus		192.126	240.288	189.066	200.21	134.108	464.78	308.05	417.293	326.125	268.403	-0.841098	-3.69386	0.000220874	0.00542279	Oda
FBgn0032779	phosphatase_activity			0	0.488154	0.124268	0.197923	0	1.83963	1.38325	6.64881	6.52877	0.353751	-3.03784	-3.68774	0.000226252	0.00552331	CG16771
FBgn0029939				4.17003	4.51805	5.90651	7.45526	3.04965	7.13516	9.19323	30.7618	9.41718	6.44068	-1.12701	-3.68765	0.000226332	0.00552331	CG9650
FBgn0000114	RNA_binding,splicing_regulator,translation_regulation			4.06972	2.24262	2.00488	1.16145	0.960527	7.48525	5.50832	19.0925	6.24669	3.24272	-1.654	-3.68615	0.000227676	0.00553942	aret
FBgn0033476	cell_surface			1.58354	2.80377	4.11153	2.91147	0.794195	4.79011	4.69844	15.1283	3.82123	7.12818	-1.44571	-3.6816	0.000231773	0.00562224	oys
FBgn0028412				0.651017	1.47777	3.59275	1.21395	3.36825	0	0.199917	0	0	0	3.22684	3.67021	0.000242353	0.00586134	Mst33A
FBgn0030477	TF			1.97314	1.8209	1.80568	1.15274	2.45368	0.0562689	0.230758	0	0	0	3.19086	3.66425	0.00024806	0.00596374	dmrt11E
FBgn0030723	cell_surface		dpr	0	0	0	0	0	1.87975	1.18469	0	0	1.09621	-2.16546	-3.66461	0.000247712	0.00596374	dpr18
FBgn0023095	cell_surface		LRR	0.677493	0.107387	0	0.217544	0	2.33618	3.50656	3.86606	1.38614	2.9192	-2.8614	-3.66294	0.000249337	0.00597672	caps
FBgn0010575	TF			13.6047	14.3922	41.1118	19.9582	12.4746	6.03794	9.2358	20.8566	4.89879	6.28679	1.14536	3.65984	0.000252376	0.00601398	sbb
FBgn0028397				2.01633	0.406061	3.80814	2.29491	0.270714	9.12749	2.96804	29.9332	5.67287	1.81109	-2.08488	-3.66049	0.000251737	0.00601398	Tob
FBgn0033654				0.471919	0.250646	0.896285	1.1257	0.203734	1.35491	3.50368	2.06096	2.92413	2.22764	-2.00296	-3.65699	0.000255191	0.00606321	Sobp
FBgn0263117				47.4985	44.1501	96.9749	85.4998	39.8884	128.136	72.4936	216.203	92.8205	78.4316	-0.830834	-3.6485	0.000263773	0.00624879	CG34377
FBgn0020309	ecdysone_inducible,TF			33.7787	29.1693	103.008	69.7516	37.5875	23.6654	17.438	58.9078	16.7573	15.6653	1.1118	3.64496	0.000267437	0.00631712	crol
FBgn0033244	actin_binding,kinase_activity			10.5858	6.3582	13.7025	9.59683	4.91228	16.2707	16.19	22.2268	13.8539	14.793	-0.88605	-3.64329	0.000269175	0.00633971	CG8726
FBgn0033985				1.58794	0.126879	6.96254	1.02047	0.116226	8.0902	9.10453	43.8355	13.8372	4.99218	-2.51852	-3.61233	0.000303457	0.00712641	CG10257
FBgn0260776				0	0.699201	0.711247	3.10572	0.303943	0	0	0	0	0	2.5008	3.61069	0.000305385	0.00715096	CG42570
FBgn0003963	TF	Nucleus		7.92804	2.48963	10.3694	7.6166	1.53534	0	0.611624	2.33525	1.1532	0.37058	2.40115	3.58214	0.000340792	0.00794753	ush
FBgn0039883	gap,synapse	Nucleus		26.3663	25.6371	71.5001	48.2817	22.7347	63.1212	53.2834	161.737	63.3916	49.8151	-0.929608	-3.5817	0.000341365	0.00794753	RhoGAP100F
FBgn0260466	membrane_transporter	Membrane		0	0	0	0	0	1.70717	0.979826	0.414529	0	0.133457	-2.41385	-3.57584	0.000349111	0.00810295	Indy-2
FBgn0260812				35.694	15.0975	45.9673	81.6925	22.8326	25.7333	0.704889	6.41908	3.45798	2.29896	2.1238	3.57514	0.000350041	0.00810295	inaF-D
FBgn0039024				0	0.437227	0.874749	1.27324	0.912289	0	0	0	0	0	2.5144	3.5731	0.000352775	0.00814297	CG4721
FBgn0264395				0.886886	0.167759	6.24272	1.91339	0	0	0	0	0	0	2.45089	3.55501	0.000377968	0.00869971	CG43843
FBgn0004569	cell_surface	Secreted (curated)		10.0582	14.0886	12.839	15.7506	8.28839	1.17471	0.21617	0	0	0	2.96703	3.55297	0.000380905	0.00874247	aos
FBgn0000479		Mitochondria		4.33633	4.89203	10.4017	11.9607	10.1812	19.7652	12.7782	45.8421	22.9491	12.6753	-1.22869	-3.54129	0.00039817	0.00911293	dnc
FBgn0000479		Secreted (highly likely)		4.33633	4.89203	10.4017	11.9607	10.1812	19.7652	12.7782	45.8421	22.9491	12.6753	-1.22869	-3.54129	0.00039817	0.00911293	dnc
FBgn0000479		Nucleus		4.33633	4.89203	10.4017	11.9607	10.1812	19.7652	12.7782	45.8421	22.9491	12.6753	-1.22869	-3.54129	0.00039817	0.00911293	dnc
FBgn0026141		Cytoplasm, Cytoskeleton		0	0	0	0	0	1.91755	1.35828	3.16165	1.14298	1.64488	-2.85168	-3.53739	0.00040411	0.00922281	Cdlc2
FBgn0031745				0.324639	1.49754	4.19453	0.363412	0	0	0.040416	0	0	0	2.88789	3.52075	0.000430327	0.00979356	rau
FBgn0028644	cell_surface		beat	0	0	0	0	0	0.516673	0.147442	0	2.03707	0	-1.9698	-3.49988	0.00046546	0.0105635	beat-Ic
FBgn0001122				18.1054	14.8948	40.7098	30.4686	20.0213	12.6386	10.7422	10.2831	11.6008	11.6003	1.02779	3.49351	0.000476706	0.0107885	Galphao
FBgn0036007	membrane_transporter	Plasma membrane		15.412	12.7617	23.5862	10.7099	13.1313	5.75402	3.4021	9.45018	7.35334	7.14766	1.17822	3.48863	0.000485508	0.0109266	path
FBgn0033463				3.7905	2.22682	2.49235	3.61541	6.41962	12.495	6.87999	28.6481	10.7014	11.1282	-1.52822	-3.48868	0.000485409	0.0109266	CG1513
FBgn0029771				0	0	0	0	0	3.99428	2.07468	0	0	2.56897	-2.03045	-3.47962	0.000502127	0.0112693	CG12730
FBgn0262475	RNA_binding,translation_regulation			0	0.0703288	0	0	0	0.588949	0.585684	0.0507266	1.2272	1.1109	-2.99409	-3.47498	0.000510896	0.0114345	bru-2
FBgn0028669	membrane_transporter			0.222287	0.487162	2.30262	0	1.17143	0	0.0369777	0	0	0	2.85467	3.46591	0.00052844	0.0117946	Vha100-3
FBgn0034720				5.12741	4.26033	10.7761	11.4234	4.00487	0.261581	1.55684	5.12276	1.70746	1.84843	1.69942	3.46281	0.000534557	0.0118983	Liprin-gamma
FBgn0038608		Nucleus		0	0	0	0	0	0.41981	1.92896	0	1.41961	0.46181	-2.37891	-3.46158	0.000537018	0.0119203	WRNexo
FBgn0032797	cell_surface			5.68097	4.20592	12.3888	7.65539	9.14305	2.89887	2.08951	7.10726	0.774885	2.39082	1.47617	3.45856	0.000543062	0.0120216	CG10186
FBgn0262737	RNA_binding,splicing_regulator			111.949	98.9074	182.95	148.238	64.2473	57.4745	67.0916	141.454	70.6669	41.9589	0.730521	3.45199	0.000556475	0.0122849	mub
FBgn0013759	kinase_activity,synapse	Plasma membrane		13.298	12.4957	35.6483	25.9884	9.69484	23.9221	36.2235	80.7621	32.628	29.1633	-1.01553	-3.45106	0.000558382	0.0122935	CASK
FBgn0261673				28.4156	39.6663	73.52	53.7626	36.2342	23.6459	14.5533	8.85689	11.1085	22.3303	1.33938	3.43592	0.000590551	0.0129665	nemy
FBgn0036454	cell_surface		ig_super	0.0195987	0	0	0	0	0	0.208005	3.48845	0.924501	0.127165	-2.68642	-3.42466	0.000615565	0.0134792	CG17839
FBgn0002593		Cytoplasm, Secreted (weakly likely)		232.438	205.444	220.607	244.583	172.072	124.343	117.663	178.597	115.979	124.069	0.740139	3.41901	0.000628504	0.0137254	RpLP1
FBgn0036868				0	0	0	0	0	0.390668	0.305167	0.594692	0.666064	0.0295993	-2.62145	-3.39892	0.000676517	0.0147342	ms(3)76Ba
FBgn0016061	cell_surface		ig_super,sidestep	27.8182	34.2535	77.9882	47.6939	21.2525	48.5537	75.7654	181.628	66.8229	54.7394	-0.954807	-3.39709	0.00068106	0.0147934	side
FBgn0035331	cell_surface			0.0124968	0.254406	0	0.517992	0.437672	2.84014	1.66391	7.29962	3.69486	0.623726	-2.60836	-3.39223	0.000693266	0.0150183	MsR1
FBgn0260470				18.9209	16.2272	18.0671	31.4277	9.12283	8.61451	9.85351	2.8581	5.14759	4.68949	1.40769	3.38784	0.000704452	0.0152199	SP555
FBgn0037989	membrane_transporter			0.135874	0.0532622	0.662011	1.97601	0.548972	0.0836192	0	0	0	0	2.87354	3.38655	0.00070777	0.0152509	ATP8B
FBgn0031356				1.40642	0.872914	0.814994	2.35369	1.36824	3.99821	3.05317	10.0878	3.91608	2.98332	-1.52282	-3.38287	0.000717339	0.0154161	CG17660
FBgn0029853		Cytoplasm, Membrane		0.967832	2.03873	0.349615	0	0	9.52203	3.96157	9.70525	19.1214	4.12792	-2.73636	-3.37958	0.000725967	0.0155603	CG3781
FBgn0052982				4.5347	3.87768	5.24588	5.21965	2.08356	0.119453	0.136028	2.376	0.0142562	0	2.6799	3.37683	0.000733254	0.015675	CG32982
FBgn0013718				9.8158	5.75863	11.2315	9.64317	3.45869	2.52524	2.1251	0	0.538896	0.813799	2.21059	3.37046	0.000750417	0.0159997	nuf
FBgn0265974		ER (membrane), Golgi apparatus (membrane)		6.95672	5.13829	18.4017	13.8477	8.40503	17.3765	16.9234	38.5063	17.2742	17.1368	-0.960669	-3.35983	0.000779895	0.0165845	ttv
FBgn0262735	RNA_binding			0.678354	0.816223	4.57346	2.6321	1.02647	7.14309	3.87545	9.10561	3.07577	3.425	-1.40646	-3.35552	0.000792158	0.0168012	Imp
FBgn0000454				2.0799	6.03955	4.73912	3.50229	1.00908	3.86514	12.5994	27.4572	11.9092	6.6491	-1.62324	-3.35457	0.00079489	0.0168151	Dip-B
FBgn0025830		Cytoskeleton		0	0.0404665	0	0.104317	0	0.573259	0.325708	1.43377	1.03691	0.196949	-2.90509	-3.3527	0.000800271	0.0168849	IntS8
FBgn0050361				0	0.0336553	0	0	0.27139	2.80662	2.07636	1.18946	0.207857	2.97705	-2.85219	-3.34396	0.000825909	0.0173805	mtt
FBgn0037294				0	0	0	0	0	1.17257	1.64106	1.38828	1.29945	0	-2.26746	-3.34189	0.000832094	0.0174654	CG12590
FBgn0264540				0	0	0	0	0	9.30012	0.706291	1.37638	16.4948	0	-2.12373	-3.34052	0.000836215	0.0175065	CG43919
FBgn0010473	cell_surface	Membrane	ig_super	43.9288	39.1116	101.519	54.5874	40.2866	18.6347	34.0313	52.9871	29.0876	20.4367	0.865637	3.33399	0.000856109	0.0178768	tutl
FBgn0038606				1.92208	0.640326	0.156668	1.14018	0	4.71925	7.2745	3.08883	4.81227	6.23153	-2.35582	-3.32815	0.000874251	0.0182087	CG15803
FBgn0032400				126.617	149.055	194.667	120.434	112.03	58.5669	68.7528	133.198	59.4323	82.831	0.847306	3.32381	0.000887961	0.0184468	CG6770
FBgn0083963	cell_surface			8.40134	10.6716	14.2404	11.4347	8.52034	21.0764	14.4429	57.6861	14.1104	12.307	-0.936318	-3.32188	0.000894117	0.0185272	CG34127
FBgn0033059				0	0	0	0.0681419	0	0	0.750245	24.8989	0	0	-1.84995	-3.31651	0.000911478	0.0188388	CG7845
FBgn0025111	membrane_transporter			0.323897	1.6689	5.59879	0.195146	1.50396	0.0571541	0.214851	0	0	0.020181	2.91579	3.31489	0.000916794	0.0188958	Ant2
FBgn0053203				2.04569	2.8894	15.2576	7.80769	3.56146	3.04369	1.74718	0.900911	1.19325	0.613988	1.75816	3.31425	0.0009189	0.0188958	CG33203
FBgn0021800				7.70317	9.80123	20.4479	20.5602	15.2886	25.0964	28.002	108.958	25.3451	19.5586	-1.20048	-3.31154	0.000927835	0.0190312	Reph
FBgn0264815		Nucleus		18.5028	10.894	57.5219	32.5962	18.0847	11.1959	6.5452	25.9254	1.83125	5.51803	1.48022	3.30937	0.000935048	0.0191307	Pde1c
FBgn0261871	cell_surface		dpr,ig_super	0	0.527628	0	0	0	5.35424	8.38721	24.0127	5.60684	3.06435	-2.51251	-3.30723	0.00094225	0.0191812	dpr2
FBgn0032297				16.4379	19.7969	22.8774	34.5522	19.9751	1.62427	13.7795	7.52064	5.26165	7.0557	1.5473	3.30753	0.000941232	0.0191812	CG17124
FBgn0011559		Secreted (curated)		0	0	0	0	0	0.313709	0.941914	0.437746	0	0.348604	-2.22915	-3.30356	0.000954646	0.0193848	Acp36DE
FBgn0031568	membrane_transporter			7.9097	8.45838	24.0082	18.4395	9.91137	28.9109	19.417	37.6442	27.7174	16.4344	-0.900823	-3.30164	0.000961197	0.019469	CG10019
FBgn0035676				3.4314	3.75467	1.85876	4.1959	1.89955	3.60296	7.68211	26.9223	11.312	3.51515	-1.4696	-3.29951	0.000968541	0.0195515	ssp6
FBgn0053993				0	0.2277	3.1661	0.534147	0.892269	0	0.0368713	0	0	0	2.6617	3.29906	0.000970094	0.0195515	CG33993
FBgn0039914	cell_surface			24.7212	22.7848	28.7401	40.2744	14.5195	11.0287	5.87198	0.0420312	2.72568	3.73212	2.05661	3.29328	0.000990267	0.0199085	mav
FBgn0038432				25.5768	41.8305	43.7727	27.6774	12.5685	20.302	8.37582	6.17162	10.434	9.37698	1.31643	3.29092	0.000998591	0.0200262	CG14883
FBgn0002643	TF	Nucleus		11.692	11.813	36.0864	26.6611	16.7028	12.5499	8.00466	18.2481	8.68414	7.62697	0.92128	3.28888	0.00100587	0.0201224	mam
FBgn0004606	ecdysone_inducible,TF	Nucleus		3.18688	2.69544	11.1193	8.59912	5.6568	13.0571	9.28148	23.4206	15.1448	10.4118	-1.12075	-3.27933	0.00104054	0.0207412	zfh1
FBgn0261872	RNA_binding			5.5021	10.6037	10.4098	12.2901	7.364	2.09412	5.14991	1.01389	1.87909	2.56779	1.62126	3.27896	0.00104192	0.0207412	scaf6
FBgn0030869				2.21279	2.95072	1.66937	3.09788	1.19089	3.54111	4.3462	18.9039	3.28176	5.04685	-1.35583	-3.2759	0.00105324	0.0209151	Socs16D
FBgn0025525	TF	Nucleus		2.40862	1.23144	5.6422	6.89638	2.84618	0	0.571852	0	0.849787	0.0377638	2.61289	3.27251	0.00106599	0.0211164	bab2
FBgn0038260	membrane_transporter			9.8404	9.46379	17.0833	20.3068	7.40177	3.06812	5.74963	6.88589	2.83679	0.262261	1.70756	3.26583	0.00109142	0.021542	CG14855
FBgn0040384		Membrane		2.9874	5.10384	3.28207	3.2985	2.09696	13.2345	9.07248	11.4516	3.21303	11.1266	-1.40839	-3.26548	0.00109279	0.021542	CG32795
FBgn0085443		Secreted (highly likely)		1.92797	2.98091	4.70119	4.73998	1.43389	0.0118118	0.701071	0	0	0	2.78812	3.25945	0.00111629	0.021952	spri
FBgn0039617	cell_surface		ig_super	0	0	0	0	0	0	0.153017	2.09638	0.400776	0.03598	-2.11753	-3.25514	0.00113336	0.0222335	CG14521
FBgn0037549	RNA_binding			0.87157	1.64449	1.68545	3.75269	1.25388	6.97181	5.29781	12.6729	7.55376	1.19869	-1.6167	-3.24503	0.00117437	0.0228721	CG7878
FBgn0032264				0	0	0	0	0	0	0.1884	0	5.05556	0.0365473	-1.72259	-3.24505	0.00117432	0.0228721	Lip4
FBgn0035007				0	0	0	0	0	2.38747	0.894371	5.2185	0	0	-1.8261	-3.24598	0.00117049	0.0228721	CG3492
FBgn0033791	cell_surface,kinase_activity			4.6414	4.14509	29.3529	12.0714	7.39833	7.61358	1.20818	3.00509	0.757295	2.13317	1.72563	3.24051	0.00119316	0.0231822	Drl-2
FBgn0000028	phosphatase_activity,TF	Nucleus		0.0201157	0	0	0	0	0	0.228048	8.65237	0	0	-1.86386	-3.23874	0.00120058	0.0232151	acj6
FBgn0064119	membrane_transporter			0	0	0	0	0	0.464402	0.257062	1.37209	0	0.00730842	-2.04313	-3.2391	0.00119908	0.0232151	CG33934
FBgn0259233				0.0746464	0.00926607	0.266953	0.269834	0.28718	0	0.00450135	0	0	0.0046571	2.87533	3.23463	0.00121802	0.0234961	CG42331
FBgn0029864				9.06458	11.1159	24.3054	13.8124	7.74426	6.66473	5.83317	14.6566	3.79312	5.5874	0.895094	3.22395	0.00126435	0.024332	CG15894
FBgn0031375	TF			52.5731	38.0321	62.9038	61.0281	43.4401	71.4341	66.2698	142.851	89.6748	64.1069	-0.661581	-3.21553	0.00130203	0.0249978	erm
FBgn0264449		Nucleus		5.05413	5.62973	15.7713	10.9818	9.71724	2.50915	3.86981	9.36738	4.46341	2.8307	1.11063	3.21136	0.00132107	0.0253033	CG43867
FBgn0016684	membrane_transporter			0	0	0	0.0164631	0	0	0	4.39139	0	1.62812	-1.65305	-3.20002	0.00137419	0.0262586	NaPi-T
FBgn0025683	membrane_transporter			0.270684	1.43887	0.117337	0.0316275	0.269607	6.44223	3.27876	0.370141	7.00838	1.73774	-2.43103	-3.19709	0.00138824	0.0264648	CG3164
FBgn0030016		Membrane		0	0	0	0	0	0.292678	0.100022	7.06902	0	0.745079	-2.01186	-3.18993	0.00142306	0.0270648	Or7a
FBgn0000579		Cytoplasm		9.20665	13.5936	15.5151	18.0498	3.11244	22.4385	23.253	54.4607	21.8713	13.4591	-1.08903	-3.17701	0.00148804	0.0282344	Eno
FBgn0033649	cell_surface			1.36886	1.04885	4.17139	1.49229	0.855434	0	0.3218	0	0	0	2.7544	3.16805	0.00153464	0.0290506	pyr
FBgn0086613		Nucleus		0	0	0	0.0397403	0.00875068	0.209504	0.155129	0.599445	0.243089	0.156381	-2.76271	-3.16167	0.00156866	0.0296254	Ino80
FBgn0033249				15.8283	44.6651	13.7777	20.6583	17.2974	20.7948	107.109	88.8885	56.9288	64.4712	-1.42744	-3.15579	0.00160062	0.0301586	CG11191
FBgn0035756				0	0.0399328	0.252253	0.775247	0.0387969	0	0	0	0	0.00364911	2.33819	3.15077	0.00162843	0.0306115	unc-13-4A
FBgn0030748				0.0104087	0	0	0	0	0	0	8.42815	0	0.208119	-1.51885	-3.15	0.0016327	0.0306207	Traf-like
FBgn0261873	kinase_activity			2.37829	2.42772	8.41208	7.32999	2.2309	8.45853	7.15825	26.5449	7.14458	6.06002	-1.15265	-3.14725	0.00164812	0.0308385	sdt
FBgn0030895				0	0	0	0	0	0	2.25412	0	1.61263	0.98791	-1.79771	-3.13638	0.00171045	0.031931	CG7135
FBgn0265607				5.95939	3.35118	4.89177	6.79181	2.43094	2.44364	2.13866	4.52501	1.88942	1.35133	0.991929	3.12946	0.00175126	0.0326178	beat-IIIa
FBgn0260753	cell_surface	Membrane		0.139268	0	0	0.0745822	0.0292314	1.99913	0.650976	0.814656	0.19552	0.420104	-2.66511	-3.12362	0.00178639	0.0331956	Pdfr
FBgn0036415				2.48976	2.47249	9.01811	1.84617	0	0	0	0	0	0.0955896	2.53896	3.11805	0.00182051	0.0337524	CG7768
FBgn0261611				1.04645	1.54062	1.16251	0.536124	1.93378	0.12589	0.385314	0	0	0.0368394	2.56399	3.11095	0.00186488	0.0344959	CG42700
FBgn0000964	TF			18.6712	15.9631	32.845	33.4506	13.435	5.25158	8.11606	23.4278	10.0644	11.0839	0.989965	3.10599	0.00189644	0.0349999	tj
FBgn0002973		Nucleus		5.28134	2.92315	10.8158	3.96152	8.19196	2.19967	1.65383	6.11741	0.448462	1.10085	1.59925	3.10477	0.0019043	0.035065	numb
FBgn0035699				0.467226	0.0857363	0	1.43927	0	5.20465	2.03838	7.89365	4.86826	1.03925	-2.4971	-3.09916	0.00194072	0.0356547	CG13300
FBgn0046999				0	0	0	0	0	3.84757	1.0801	21.2314	0	0	-1.69337	-3.09283	0.00198258	0.0363414	CG6429
FBgn0033792	cell_surface			0.0306946	0.169322	4.80188	0.0354986	1.56075	0.150429	0	0	0	0	2.50751	3.07182	0.00212758	0.0389113	CG13325
FBgn0022981	membrane_transporter			0	0.675812	1.01676	2.04673	0	0	0	0	0.0152866	0	2.02976	3.06972	0.00214257	0.0390971	rpk
FBgn0033697		ER (membrane)		0.0154999	0	0	0	0	0	0	1.35733	4.48869	0	-1.48547	-3.06809	0.00215429	0.0392225	Cyp6t3
FBgn0036202	cell_surface		EGF,LDL	16.0461	13.3725	30.61	20.2242	11.5075	19.4989	25.2055	50.9367	38.9207	27.3116	-0.807873	-3.06367	0.00218643	0.0397184	CG6024
FBgn0034436				4.52595	3.41945	15.7932	5.5188	5.18199	0.29585	0.612586	0	2.90719	0.824532	2.16782	3.06071	0.00220815	0.0400234	CG11961
FBgn0032587				0.0270189	0.661843	0.322086	0	0.0201992	0.725466	1.5474	6.45743	3.2204	0.40847	-2.4729	-3.05029	0.00228622	0.0413458	CG5953
FBgn0000451				1.93222	0.0361229	0.925059	0.654531	0.07721	0	0	0.0474178	0.0637305	0	2.62504	3.03659	0.00239272	0.0431755	ect
FBgn0051774	cell_surface		ig_super	0	0.00437444	0	0	0	0.0746157	0.532697	0	0	0.4021	-1.96889	-3.03535	0.0024026	0.0432575	fred
FBgn0003867		Secreted (curated)		0	0.0181577	0	0.0489428	0	0.36135	1.12906	7.70077	0	0	-2.22691	-3.0325	0.00242533	0.0435699	tsl
FBgn0053547	synapse			15.9666	14.1772	42.2013	23.6762	12.9905	32.5141	37.1808	121.951	26.8456	22.1648	-0.968023	-3.02179	0.00251285	0.0450422	Rim
FBgn0052264				16.3864	15.6161	32.0487	21.4498	10.9331	26.6326	23.0826	75.1187	26.617	22.3656	-0.741171	-3.00934	0.00261813	0.0468257	CG32264
FBgn0038087			beat	0	0	0	0	0	0.420186	0.81672	0	1.50652	0	-1.67111	-3.00344	0.00266948	0.047639	beat-Va
FBgn0014380		Cytoplasm		0	0	0.247909	0	0	0.66052	0.601953	0	6.42186	1.86834	-2.37235	-3.00204	0.0026818	0.0477538	RhoL
FBgn0003310		ER (membrane), Golgi apparatus (membrane)		3.92081	2.8006	3.69358	6.12565	3.60574	0.99671	1.81132	1.68808	1.54639	2.21397	1.18638	2.98916	0.00279745	0.0497039	S
FBgn0061435				0	0	0	0	0	0	2.5305	24.9853	0	2.1599	-1.65052	-2.98683	0.00281889	0.0499752	CG30270
